# Supplementary material for: Molecular Targets and Biological Functions of cAMP Signaling in Arabidopsis
Source: Biomolecules. 2021 May 3;11(5):688. doi: 10.3390/biom11050688 (PMC8147800; doi:10.3390/biom11050688)
Supplement: Supplementary file 1 [file biomolecules-11-00688-s001.zip]

Archive with 13 entries (13 files):
- Supplementary Data S1.xlsx
- Supplementary Data S2.xlsx
- Supplementary Data S3.xlsx
- Supplementary Data S4.xlsx
- Supplementary Data S5.xlsx
- Supplementary Data S6.xlsx
- Supplementary Data S7.xlsx
- Supplementary Figure S1.pdf
- Supplementary Figure S2.pdf
- Supplementary Table S1.pdf
- Supplementary Table S2.pdf
- Supplementary Table S3.pdf
- Supplementary Table S4.pdf
