# Supplementary material for: Molecular Targets and Biological Functions of cAMP Signaling in Arabidopsis
Source: Biomolecules. 2021 May 3;11(5):688. doi: 10.3390/biom11050688 (PMC8147800; doi:10.3390/biom11050688)
Supplement: Supplementary file 1 [file biomolecules-11-00688-s001.zip › Supplementary Data S1.xlsx]

## Sheet: Group.LD_vs_LB.deg_all.annot
Supplementary Data S1. List of cAMP-responsive genes (CRGs) （differentially expressed genes with an absolute value of log2 (fold change) >1 and FDR < 0.05)
gene_id	expression_LD	expression_LB	log2FC(LD/LB)	p-value	fdr	regulate	fpkm_LD1	fpkm_LD2	fpkm_LD3	fpkm_LB1	fpkm_LB2	fpkm_LB3
AT3G04930	35.795	3.0835	3.53285	7.23113e-58	1.46915e-53	up	35.1034	35.2721	37.0096	3.15256	2.2464	3.85155
AT2G01505	1.2584	0	6.98686	8.40773e-21	3.4164e-17	up	1.09208	1.54319	1.13992	0	0	0
AT1G74930	85.792	21.7824	1.97719	3.55371e-20	1.20335e-16	up	105.656	81.5048	70.2149	23.3015	23.9059	18.1399
AT1G50745	15.1142	4.05166	1.89672	1.28411e-17	2.37175e-14	up	14.8564	17.6104	12.8759	4.5719	4.20717	3.37593
AT4G02410	23.4733	7.86801	1.57573	3.38282e-17	5.72739e-14	up	28.065	21.1211	21.2337	7.84785	8.70689	7.04929
AT1G56070	246.81	83.2853	1.56715	1.95065e-16	2.80326e-13	up	252.765	244.087	243.579	85.9025	78.9694	84.9841
AT3G21150	31.1294	11.0448	1.49407	2.26105e-15	2.58085e-12	up	34.3901	31.9055	27.0925	10.8536	12.5236	9.75705
AT5G47230	29.839	9.40854	1.66411	2.41356e-15	2.58085e-12	up	33.5297	33.008	22.9794	10.4138	8.32536	9.48647
AT5G61600	168.681	52.4667	1.68463	3.35257e-15	3.40571e-12	up	164.813	182.042	159.186	60.5808	39.5516	57.2677
AT1G72910	48.3271	12.3694	1.96519	2.09087e-13	1.63385e-10	up	50.451	56.3864	38.144	7.80208	17.4779	11.8282
AT2G31980	155.015	57.9924	1.41832	3.52492e-13	2.65244e-10	up	137.717	179.328	148	54.0659	64.7216	55.1897
AT2G01008	3.96934	0.763653	2.36277	4.99688e-13	3.62577e-10	up	3.88504	4.01445	4.00853	0.872098	0.615119	0.803743
AT1G56600	41.9539	16.9032	1.311	1.02329e-12	6.11479e-10	up	46.3612	44.514	34.9866	18.8813	16.1757	15.6525
AT1G72920	38.901	10.5159	1.88623	1.36081e-12	7.67986e-10	up	37.1866	44.0788	35.4374	7.1514	15.8344	8.56203
AT3G45650	26.3836	9.98108	1.40148	2.66658e-12	1.38915e-09	up	22.4314	33.3489	23.3706	10.7581	10.2812	8.90398
AT2G40140	183.973	70.4567	1.38456	4.36034e-12	2.10926e-09	up	204.402	190.559	156.959	63.7164	77.873	69.7809
AT1G23730	15.3566	5.74703	1.4164	1.58928e-11	6.20951e-09	up	13.9245	17.9989	14.1463	5.72235	6.57345	4.94529
AT2G38470	329.099	129.644	1.3439	1.95857e-11	7.36894e-09	up	378.61	307.114	301.573	122.941	144.652	121.338
AT1G61470	19.1698	6.49726	1.55946	1.61929e-10	4.11238e-08	up	24.8894	17.9971	14.6228	5.46578	7.8434	6.18261
AT3G09870	40.9668	16.2244	1.33576	2.96295e-10	7.08215e-08	up	41.068	43.3563	38.4761	18.9016	12.9741	16.7974
AT4G23810	79.894	26.5734	1.58774	3.67131e-10	8.67325e-08	up	97.1482	81.7868	60.747	19.8929	36.3765	23.4506
AT3G15760	32.3	14.1674	1.18839	3.93933e-10	9.19946e-08	up	35.5867	33.3282	27.9852	14.8758	14.6892	12.9373
AT4G25470	25.4966	10.4021	1.29261	6.83994e-10	1.49904e-07	up	21.1008	29.0664	26.3228	9.87211	9.60546	11.7287
AT4G39840	19.8879	0	10.9584	1.36953e-09	2.83926e-07	up	30.2448	29.4189	0	0	0	0
AT2G15020	6.66751	2.42487	1.45546	1.97119e-09	3.92634e-07	up	8.02676	5.96455	6.01123	2.61063	2.16308	2.50092
AT5G01815	24.7241	3.05104	3.01441	2.54364e-09	4.78511e-07	up	19.2542	44.328	10.5903	1.55805	3.97247	3.62262
AT3G16720	62.4968	28.4887	1.13312	2.5948e-09	4.83657e-07	up	69.0408	61.8162	56.6336	28.9527	24.8875	31.626
AT5G02020	17.465	6.28849	1.47221	2.98612e-09	5.40278e-07	up	24.7333	13.0203	14.6414	6.93415	6.17037	5.76096
AT1G35210	49.4862	23.0269	1.10337	3.73698e-09	6.66002e-07	up	48.7634	58.2724	41.4228	24.306	20.3419	24.4329
AT1G64390	29.193	13.3693	1.12611	4.4331e-09	7.63282e-07	up	30.6057	30.2974	26.6759	15.5149	13.5774	11.0157
AT2G30020	243.361	113.666	1.09823	5.41864e-09	9.17421e-07	up	266.184	231.387	232.512	109.893	118.761	112.343
AT3G18710	14.3833	4.77333	1.5893	6.09875e-09	9.9926e-07	up	19.4905	14.5979	9.06134	4.12609	6.03177	4.16215
AT1G60190	29.2506	14.4612	1.01577	6.62884e-09	1.06887e-06	up	31.3045	28.1757	28.2715	13.1633	15.6303	14.5902
AT3G41762	6.15116	1.6612	1.88232	1.25615e-08	1.79727e-06	up	5.15864	6.49445	6.8004	1.51868	2.18296	1.28196
AT5G57180	4.67656	1.88312	1.30776	1.48172e-08	2.07614e-06	up	5.2289	4.72426	4.07652	1.68324	2.21373	1.7524
AT2G17040	82.3388	29.478	1.48162	1.64893e-08	2.2636e-06	up	93.1176	90.4075	63.4914	21.6154	42.7024	24.1162
AT4G24570	702.089	334.841	1.06816	1.86756e-08	2.50034e-06	up	736.786	716.392	653.088	319.263	347.878	337.382
AT3G12030	6.71751	0	9.39393	3.04366e-08	3.77062e-06	up	10.1767	9.97586	0	0	0	0
AT4G15248	22.2194	9.00375	1.30227	3.71493e-08	4.51953e-06	up	24.8593	18.7627	23.0363	9.09711	9.89172	8.02241
AT4G19170	43.0335	20.3481	1.08019	3.77485e-08	4.5651e-06	up	45.5668	35.4871	48.0465	22.4171	20.351	18.2761
AT5G58680	24.8205	12.339	1.00772	3.92062e-08	4.71332e-06	up	27.0001	25.6105	21.8508	11.5487	13.5124	11.9559
AT5G11060	10.5698	5.19351	1.02375	4.24103e-08	4.95201e-06	up	10.9515	11.0511	9.70674	5.44757	5.45077	4.6822
AT2G40130	2.31472	0.706495	1.69803	4.27101e-08	4.95852e-06	up	2.85096	2.29441	1.79877	0.751965	0.789519	0.578001
AT4G32208	1.17654	0.0240456	5.12315	5.87803e-08	6.49043e-06	up	1.87842	0.143777	1.50743	0	0.0385532	0.0335836
AT5G56880	1.37363	0.121604	3.39418	6.58832e-08	7.1965e-06	up	1.08085	0.67443	2.3656	0.072632	0.115741	0.176438
AT5G21960	30.4022	14.001	1.11808	8.99319e-08	9.46708e-06	up	31.4558	26.8364	32.9143	14.6958	10.2023	17.1051
AT4G25490	3.22873	0.791907	2.01392	1.05465e-07	1.09323e-05	up	3.26936	3.85847	2.55837	0.846876	0.764729	0.764117
AT5G09400	403.68	121.785	1.72879	1.55928e-07	1.50141e-05	up	420.367	423.697	366.976	85.9594	207.216	72.1801
AT4G11340	1.81978	0.322399	2.46068	2.47002e-07	2.23037e-05	up	1.56851	2.79559	1.09526	0.292448	0.38631	0.28844
AT1G19210	11.5025	4.37044	1.39405	3.9696e-07	3.33266e-05	up	13.2623	12.0046	9.24059	3.73618	5.35222	4.02291
AT4G27260	24.3255	12.0169	1.0168	5.01658e-07	4.10975e-05	up	30.3572	20.2041	22.4153	13.2153	9.98753	12.8478
AT5G27420	59.1884	23.7425	1.31748	1.03016e-06	7.58327e-05	up	59.4899	66.5713	51.5042	16.9785	36.1383	18.1109
AT2G03090	9.73051	4.35387	1.15839	1.12241e-06	8.17345e-05	up	10.897	9.23648	9.05808	5.09495	3.6268	4.33988
AT1G72940	44.7675	21.4599	1.06046	1.76393e-06	0.000121897	up	42.3639	48.7676	43.1709	17.1807	29.259	17.9401
AT4G04075	10.29	2.89091	1.82807	2.63184e-06	0.000173046	up	11.5538	10.9085	8.40768	2.65896	2.23894	3.77484
AT1G56150	25.5704	11.5867	1.14132	3.21389e-06	0.000205146	up	25.2118	32.0577	19.4416	10.4644	14.664	9.63172
AT1G49320	5.59616	1.99621	1.48254	3.54512e-06	0.000218925	up	6.13492	6.83948	3.81408	1.97885	2.10223	1.90755
AT5G55150	1.96848	0.107924	4.06847	3.60953e-06	0.000220225	up	2.32663	3.17902	0.399797	0.0396251	0.284147	0
AT4G15310	0.583751	0.0659684	2.96639	3.79546e-06	0.000229501	up	0.614341	0.785491	0.351422	0.0431595	0.154746	0
AT4G30250	3.8704	1.49289	1.36846	3.96529e-06	0.000239058	up	4.61547	3.98316	3.01257	1.83479	1.34848	1.29541
AT5G41761	12.5916	5.92258	1.08687	5.29771e-06	0.000302341	up	12.9303	14.1256	10.7189	5.88178	6.73669	5.14927
AT1G29240	6.0374	2.98577	1.01339	8.45672e-06	0.000448604	up	6.61259	5.84087	5.65876	3.33487	2.51967	3.10276
AT1G30190	4.63142	1.5939	1.53298	8.92653e-06	0.000472292	up	4.16183	5.79911	3.93332	1.38394	1.32787	2.0699
AT2G32010	3.73002	1.71756	1.11431	1.5935e-05	0.000756643	up	4.64899	3.36936	3.17172	1.98346	1.49387	1.67534
AT4G05380	0.717528	0.0552457	3.47905	1.93719e-05	0.0008945	up	1.11074	0.926084	0.115762	0.108998	0	0.0567386
AT3G14440	7.403	3.5827	1.04499	2.2096e-05	0.00099983	up	9.90895	5.98281	6.31724	4.33737	3.31883	3.09191
AT3G51710	5.10976	2.30404	1.14566	2.30914e-05	0.00103892	up	5.36365	5.55664	4.40899	2.33917	1.84329	2.72966
AT2G46400	224.522	109.068	1.04157	2.62146e-05	0.00114785	up	213.103	280.725	179.739	86.9108	146.042	94.2505
AT1G80325	5.5679	2.0489	1.43785	7.60771e-05	0.00281541	up	5.91121	5.5796	5.2129	1.60528	3.59233	0.949098
AT5G52750	155.086	76.5689	1.01814	8.2164e-05	0.00297562	up	160.169	186.329	118.759	60.3306	108.969	60.4074
AT5G51190	15.962	4.87404	1.7094	8.88444e-05	0.00315518	up	8.26926	21.342	18.2749	8.16449	4.2832	2.17441
AT5G66350	0.950135	0.33067	1.49486	9.76634e-05	0.00340348	up	0.946052	0.831763	1.07259	0.307368	0.346358	0.338283
AT2G34650	4.26432	2.06529	1.04238	0.000117683	0.00397831	up	5.07493	3.88037	3.83766	2.19426	1.68307	2.31852
AT3G63210	5.10838	2.01382	1.33861	0.000123432	0.00412462	up	7.65089	4.24204	3.43221	2.436	1.37522	2.23023
AT3G56408	10.4332	4.14792	1.32862	0.000180404	0.00561296	up	9.65679	12.2689	9.37375	2.29986	2.62999	7.51392
AT3G10590	2.84749	0.877004	1.68774	0.00018319	0.00566496	up	3.49185	3.11152	1.93912	0.671257	0.673891	1.28586
AT5G10130	2.58821	0.865142	1.56993	0.000198971	0.00603359	up	2.21646	3.53845	2.00972	1.06578	0.623881	0.905769
AT5G03150	2.66292	1.1941	1.15047	0.000208087	0.00626326	up	3.05756	2.77493	2.15628	0.97014	1.36266	1.24949
AT5G51990	4.70418	2.12674	1.1416	0.000266451	0.0076032	up	4.49529	4.77211	4.84513	2.00171	2.19761	2.18089
AT5G53730	3.10456	1.31753	1.23029	0.000340872	0.00938414	up	3.50629	3.36087	2.44653	1.32581	1.50531	1.12148
AT1G54870	4.01405	0.477946	3.04386	0.000431872	0.0112492	up	10.3171	0.39353	1.33157	0.300197	0.379885	0.753754
AT5G67450	10.7295	4.94866	1.1149	0.000465529	0.0119271	up	10.9962	12.0298	9.16252	3.67424	7.97003	3.20172
AT3G28620	2.46723	0.932764	1.39376	0.000467453	0.0119613	up	2.2702	2.89289	2.23862	1.02821	0.8602	0.909887
AT5G47610	5.81202	2.74078	1.08168	0.000513571	0.0129136	up	6.81687	5.42438	5.19481	2.71223	3.24151	2.26859
AT5G36740	0.513318	0.187589	1.40518	0.000633998	0.0154263	up	0.472428	0.493096	0.57443	0.270434	0.123407	0.168928
AT3G15670	6.10335	0.669135	3.17019	0.000739456	0.0174137	up	16.1915	0.425341	1.69318	0.830806	0.241525	0.935074
AT5G53486	2.52029	1.00126	1.32315	0.000756736	0.0177217	up	2.0721	3.24412	2.24463	0.862648	1.10831	1.03281
AT4G02780	0.552796	0.192681	1.4734	0.000765522	0.0178566	up	0.614904	0.53426	0.509223	0.265421	0.143259	0.169362
AT5G53210	0.558293	0.19581	1.46532	0.000864959	0.0196131	up	0.591929	0.468695	0.614255	0.189283	0.201086	0.197061
AT5G47130	2.56274	0.758578	1.74304	0.000930983	0.0208313	up	2.15876	3.92784	1.60161	0.508962	1.37427	0.3925
AT4G17220	15.7278	7.81699	1.0077	0.00109606	0.0239191	up	18.21	18.9214	10.0519	8.96649	4.36589	10.1186
AT1G77110	1.7369	0.794266	1.11905	0.00143788	0.0300859	up	1.98665	1.39867	1.82536	0.984881	0.784717	0.613199
AT4G14450	10.3941	4.93022	1.07451	0.00172162	0.0345293	up	11.2622	12.1364	7.78384	3.22343	6.97499	4.59225
AT4G26050	2.77087	1.22864	1.16678	0.00173274	0.0346784	up	2.22029	4.04698	2.04534	0.930608	1.43661	1.31871
AT4G14465	1.26087	0.431282	1.52604	0.00218814	0.0420989	up	0.906264	2.17943	0.6969	0.529994	0.42228	0.341572
AT4G28940	3.44485	1.51031	1.18426	0.0022644	0.043198	up	2.39713	3.81973	4.11768	1.52689	2.14689	0.857151
AT1G46480	2.04113	0.908638	1.15885	0.00236199	0.0445577	up	1.86388	2.40525	1.85426	1.14278	0.872591	0.710539
AT5G20820	5.15296	2.38034	1.11099	0.00237759	0.0448102	up	4.41384	6.5624	4.48266	2.22489	2.46355	2.45256
AT5G46790	0.798728	14.7555	-4.19043	1.89448e-56	1.9245e-52	down	0.899397	0.811343	0.685445	15.2744	15.7433	13.2488
AT5G64750	10.4429	60.2639	-2.52763	1.67616e-22	1.13515e-18	down	7.81643	8.33543	15.1768	63.9698	51.7376	65.0844
AT1G72416	13.046	62.5089	-2.25958	4.33996e-22	2.20437e-18	down	8.6751	15.5968	14.8659	70.2161	57.3674	59.9433
AT3G50970	16.3105	62.563	-1.93885	5.91447e-19	1.71663e-15	down	11.5384	18.5412	18.8521	64.9991	52.4857	70.2044
AT1G43160	5.07759	27.3808	-2.42864	9.94029e-19	2.52446e-15	down	4.76465	3.83417	6.63396	25.1608	20.4052	36.5766
AT4G19700	8.11302	25.2022	-1.63404	2.9449e-18	6.64795e-15	down	8.92324	7.87289	7.54294	25.5643	23.4467	26.5957
AT5G67190	6.52287	21.4879	-1.7184	3.72601e-18	7.57013e-15	down	6.23314	6.00481	7.33067	20.0796	23.4025	20.9815
AT5G25350	20.7048	86.0843	-2.05526	1.16912e-16	1.82716e-13	down	15.2462	18.7069	28.1613	92.6297	70.9132	94.71
AT2G38240	12.4846	69.7474	-2.48104	2.06964e-16	2.80326e-13	down	9.94966	8.19895	19.3052	79.7907	53.2857	76.1658
AT2G31010	3.35161	11.3198	-1.7529	7.14478e-16	9.07254e-13	down	2.64442	3.12132	4.28909	10.7878	10.5005	12.6712
AT4G37790	22.779	63.9638	-1.48914	2.37355e-15	2.58085e-12	down	21.3481	24.0495	22.9394	67.5329	55.9051	68.4532
AT5G54300	13.138	35.5416	-1.43507	3.70679e-15	3.58623e-12	down	13.8382	11.3117	14.264	33.5021	32.2615	40.8613
AT2G29440	10.8372	35.6888	-1.71855	8.59094e-15	7.93374e-12	down	9.15465	9.72572	13.6312	38.1092	27.4755	41.4817
AT1G14780	6.28363	16.6422	-1.40375	6.24132e-14	5.51326e-11	down	5.57103	6.13823	7.14161	17.5971	14.6319	17.6975
AT5G67480	8.65159	22.8603	-1.40077	8.61998e-14	7.29718e-11	down	7.79897	8.81075	9.34506	27.7396	20.0983	20.743
AT5G01380	16.9699	53.2655	-1.64964	1.46323e-13	1.18914e-10	down	13.2236	16.3835	21.3027	59.7854	41.2282	58.783
AT2G44670	32.4098	80.2841	-1.30842	6.55573e-13	4.43976e-10	down	27.525	37.1723	32.532	75.9788	81.6307	83.2429
AT3G53600	4.11277	15.4916	-1.91073	6.37176e-13	4.43976e-10	down	2.98956	4.92611	4.42264	15.5446	15.5783	15.3519
AT1G27910	5.54239	14.8472	-1.41999	6.91085e-13	4.52928e-10	down	4.59088	5.35688	6.6794	15.5338	12.884	16.1239
AT4G37530	14.2809	34.6896	-1.27982	8.62503e-13	5.47609e-10	down	12.6631	16.2353	13.9444	30.9579	36.0405	37.0704
AT1G75860	21.8495	55.9172	-1.35529	9.84834e-13	6.06329e-10	down	18.9611	22.7121	23.8754	51.5747	51.1067	65.0702
AT5G52310	11.5951	37.467	-1.69124	1.26692e-12	7.35429e-10	down	10.0497	9.16167	15.5739	37.1544	30.6826	44.5638
AT4G24960	28.7348	65.3553	-1.18523	1.76258e-12	9.67849e-10	down	28.8696	26.8897	30.445	65.9132	65.6339	64.5188
AT4G08170	5.75151	13.4271	-1.2217	1.83025e-12	9.78557e-10	down	5.71446	5.4195	6.12057	14.1455	13.9247	12.2112
AT2G32510	5.05248	15.7315	-1.63666	3.21635e-12	1.63366e-09	down	4.79512	4.59335	5.76897	17.5012	11.2408	18.4527
AT4G33070	2.33581	8.57035	-1.87095	3.47426e-12	1.72162e-09	down	1.82806	1.92585	3.25353	9.72847	7.05038	8.93221
AT5G56160	4.41152	12.0263	-1.44478	4.81117e-12	2.27322e-09	down	3.54804	4.28534	5.40117	12.3339	10.9232	12.8219
AT3G27170	14.3364	38.4041	-1.42095	7.16905e-12	3.31031e-09	down	12.8069	12.1303	18.0718	40.848	34.7468	39.6173
AT5G38710	22.7856	56.3061	-1.30479	7.79818e-12	3.52079e-09	down	19.6901	22.2239	26.4427	57.2749	53.3418	58.3016
AT1G62975	0.582344	4.35351	-2.88098	8.80589e-12	3.88933e-09	down	0.314682	0.837543	0.594808	6.08691	3.15298	3.82062
AT5G12340	10.2358	31.0447	-1.59978	1.02538e-11	4.43246e-09	down	6.9887	12.4593	11.2594	26.7639	35.0706	31.2997
AT4G16563	5.37016	16.7654	-1.64062	1.06538e-11	4.50943e-09	down	3.542	6.74837	5.82012	17.4684	14.5709	18.2568
AT1G72510	28.7994	71.5239	-1.31209	1.20145e-11	4.98161e-09	down	23.9199	30.1255	32.3529	75.7131	65.9174	72.9413
AT5G25280	26.2057	65.1988	-1.31464	1.46839e-11	5.96665e-09	down	23.1836	27.5721	27.8614	73.5852	56.5538	65.4574
AT5G12050	3.30098	9.5696	-1.53271	1.55005e-11	6.17498e-09	down	2.92873	3.33082	3.64338	10.3769	9.08457	9.24729
AT1G77680	4.41146	10.6257	-1.26633	1.67642e-11	6.42639e-09	down	4.76754	3.59334	4.87349	10.6743	9.80116	11.4017
AT3G12920	6.85597	17.4615	-1.34747	2.27737e-11	8.41261e-09	down	5.73357	8.34781	6.48653	18.0801	16.9524	17.3522
AT5G15410	19.4144	46.5798	-1.26214	2.54509e-11	9.23367e-09	down	17.5669	19.6702	21.0063	42.9146	44.6647	52.1601
AT5G61810	6.21069	16.8958	-1.44237	2.84588e-11	1.01438e-08	down	5.4335	5.33609	7.86247	17.698	14.5159	18.4734
AT4G23070	0.379121	2.75553	-2.82926	2.96979e-11	1.0403e-08	down	0.308151	0.424554	0.404659	2.70945	2.25155	3.3056
AT4G21870	12.0163	32.6967	-1.44339	3.13314e-11	1.04801e-08	down	10.1878	12.1667	13.6943	39.8145	26.2057	32.0698
AT4G35320	23.9719	63.8135	-1.41214	3.05207e-11	1.04801e-08	down	16.9367	27.1652	27.8139	68.5909	56.026	66.8238
AT5G44130	61.4689	169.951	-1.46704	3.14655e-11	1.04801e-08	down	44.964	64.1657	75.2769	187.078	153.042	169.733
AT3G25730	1.47533	5.76805	-1.9598	4.02996e-11	1.32059e-08	down	1.29353	1.57049	1.56197	7.07781	5.21822	5.00812
AT5G52882	14.9228	38.3369	-1.36063	5.30216e-11	1.7099e-08	down	12.9418	14.8875	16.9389	42.5485	30.9743	41.488
AT5G44050	9.17768	34.982	-1.92925	5.52937e-11	1.75531e-08	down	4.96957	8.51131	14.0522	36.2918	31.0476	37.6066
AT3G25760	32.4049	100.911	-1.63849	5.65045e-11	1.76616e-08	down	24.6915	25.6919	46.8313	105.978	106.641	90.1121
AT4G03400	7.54002	35.5905	-2.23734	5.89902e-11	1.81591e-08	down	4.07534	6.65214	11.8926	46.666	24.9218	35.1837
AT4G03390	11.5022	32.1282	-1.48112	6.02059e-11	1.82568e-08	down	9.36284	11.9604	13.1834	34.355	23.6029	38.4266
AT5G12010	19.7559	45.9433	-1.21716	6.12812e-11	1.83096e-08	down	17.216	21.3918	20.6598	46.9761	42.1524	48.7014
AT4G16780	25.4587	57.7113	-1.18038	6.47713e-11	1.90719e-08	down	26.947	22.8784	26.5508	51.7687	65.1978	56.1676
AT4G25260	7.86764	18.029	-1.19529	6.60586e-11	1.9173e-08	down	7.72957	7.63775	8.23561	18.8386	16.6352	18.6133
AT2G27690	114.632	323.12	-1.49498	7.18782e-11	2.05683e-08	down	82.6498	115.25	145.996	343.012	320.885	305.463
AT3G59350	80.85	204.603	-1.3394	7.38271e-11	2.08326e-08	down	64.1563	86.3294	92.0643	204.104	207.936	201.769
AT5G52120	3.21859	10.2774	-1.67191	7.79623e-11	2.16981e-08	down	2.44493	3.13229	4.07856	10.722	8.99575	11.1146
AT4G27560	10.5672	23.5825	-1.15737	8.75155e-11	2.40277e-08	down	10.2761	9.20943	12.2162	24.1094	23.5339	23.1042
AT1G15670	12.7363	28.0856	-1.14027	9.0684e-11	2.42853e-08	down	12.6057	11.2996	14.3035	30.6087	25.7027	27.9454
AT1G76090	16.7058	41.4812	-1.31159	9.16096e-11	2.42853e-08	down	12.3171	18.0282	19.772	42.6688	38.7237	43.0511
AT3G49940	9.31951	21.0625	-1.17549	9.20395e-11	2.42853e-08	down	8.75571	8.75645	10.4464	23.0326	18.9076	21.2473
AT1G61120	8.32334	27.8719	-1.74236	1.27616e-10	3.32406e-08	down	4.99104	11.2252	8.75383	21.4239	32.3497	29.8421
AT4G32800	43.193	121.316	-1.48969	1.44791e-10	3.7237e-08	down	28.8117	50.8941	49.8731	112.178	128.52	123.25
AT2G46240	2.25509	5.6285	-1.31574	1.82309e-10	4.57279e-08	down	2.52003	2.38748	1.85776	5.11451	6.06194	5.70904
AT2G25200	10.39	27.1747	-1.38621	1.94822e-10	4.82708e-08	down	7.76535	9.69445	13.7102	26.5173	29.0258	25.9811
AT5G44260	2.93719	9.31508	-1.66178	2.13817e-10	5.23388e-08	down	2.79304	2.21207	3.80645	10.8321	8.04145	9.07168
AT3G02550	24.0487	51.2096	-1.09014	2.41826e-10	5.84902e-08	down	23.1229	24.0886	24.9346	52.8514	52.7581	48.0193
AT5G63450	10.15	42.6804	-2.07101	4.05611e-10	9.36455e-08	down	7.86438	7.03319	15.5524	49.8102	24.3841	53.847
AT3G06070	78.9123	201.54	-1.35263	4.32672e-10	9.87707e-08	down	59.5161	80.6086	96.6122	222.999	191.055	190.566
AT3G27960	17.0199	38.8914	-1.19175	5.28769e-10	1.19367e-07	down	18.0548	17.2054	15.7994	34.964	35.7514	45.9586
AT1G16370	23.0506	54.3109	-1.23608	6.64191e-10	1.4829e-07	down	19.8031	20.9366	28.4121	57.5674	49.9648	55.4004
AT4G39980	21.2393	48.4208	-1.18851	6.8618e-10	1.49904e-07	down	19.4205	23.5534	20.7442	48.7677	41.2293	55.2654
AT5G62360	9.57056	27.1025	-1.50078	6.94475e-10	1.50103e-07	down	8.20016	10.0759	10.4356	33.4412	18.4376	29.4287
AT1G22360	18.7714	44.4678	-1.24378	7.40536e-10	1.58373e-07	down	14.8759	18.0786	23.3595	44.2372	42.7303	46.4357
AT1G11380	8.44166	24.9548	-1.56259	8.39376e-10	1.77642e-07	down	5.98207	8.48315	10.8598	26.8055	18.1787	29.8801
AT5G61780	37.0133	84.3486	-1.1881	1.29276e-09	2.70773e-07	down	33.3943	36.671	40.9747	86.9589	75.0987	90.9881
AT2G41830	3.50314	7.90372	-1.1716	1.62235e-09	3.32942e-07	down	3.37582	3.08366	4.04992	8.53733	7.05035	8.12348
AT2G47440	35.0202	88.6298	-1.33935	1.91278e-09	3.8862e-07	down	24.8269	36.8592	43.3746	95.5083	85.8309	84.5502
AT2G19800	22.6866	63.485	-1.48417	1.93844e-09	3.89933e-07	down	16.9591	25.0793	26.0212	62.9275	45.2496	82.2778
AT3G58620	7.38397	18.8508	-1.35097	2.24126e-09	4.42094e-07	down	5.84822	6.39818	9.90552	19.8295	15.0822	21.6406
AT1G72470	5.48141	12.0348	-1.13317	2.27564e-09	4.44559e-07	down	4.73742	5.54792	6.15889	12.4377	11.9479	11.7189
AT5G55050	9.83031	20.7252	-1.0753	2.3304e-09	4.50922e-07	down	8.98253	9.08947	11.4189	21.2742	20.5368	20.3645
AT4G06746	0.609143	3.42957	-2.47388	2.40315e-09	4.60612e-07	down	0.43627	0.651159	0.74	3.01182	2.90114	4.37576
AT4G38420	35.0292	101.627	-1.53639	2.4786e-09	4.70632e-07	down	21.7763	36.7251	46.5862	87.7285	112.707	104.446
AT1G69570	21.7638	57.2785	-1.39566	2.84548e-09	5.2556e-07	down	14.5727	22.3569	28.3618	59.6935	53.0135	59.1286
AT2G19570	0	14.1414	-10.4667	3.00495e-09	5.40278e-07	down	0	0	0	18.6856	23.7387	0
AT2G34770	45.9781	109.399	-1.2504	2.99593e-09	5.40278e-07	down	35.9112	44.4708	57.5524	113.795	103.115	111.288
AT3G25180	4.65737	13.9237	-1.5779	3.98596e-09	7.04198e-07	down	3.88515	5.63988	4.44707	9.7779	19.9212	12.0719
AT1G51090	7.96983	23.0733	-1.53242	4.11554e-09	7.20822e-07	down	5.57307	6.86615	11.4703	25.7082	21.6448	21.8669
AT5G28237	8.15663	20.588	-1.33469	4.21256e-09	7.3151e-07	down	6.79842	6.2655	11.406	21.9433	19.4799	20.3408
AT1G10090	11.4586	23.5071	-1.03602	4.84656e-09	8.27458e-07	down	10.6022	10.7168	13.0567	22.4311	22.8201	25.2701
AT2G40230	1.61622	5.26563	-1.69782	5.52284e-09	9.27335e-07	down	1.44023	1.30236	2.10608	5.72583	5.36783	4.70325
AT5G65280	15.3722	36.8667	-1.26145	5.57892e-09	9.29073e-07	down	13.1418	13.387	19.5876	40.6835	29.8099	40.1067
AT5G53750	23.6048	54.0136	-1.1939	5.90128e-09	9.74766e-07	down	18.8493	22.4142	29.5508	55.9102	56.0438	50.0868
AT3G50650	3.57855	8.72464	-1.28335	6.26485e-09	1.01826e-06	down	3.2418	3.5765	3.91734	10.2494	7.19105	8.7335
AT3G45060	4.88444	11.4521	-1.22765	6.79148e-09	1.07934e-06	down	4.75483	4.63159	5.26692	9.49912	10.952	13.9051
AT5G41800	7.48993	16.1798	-1.11014	6.80002e-09	1.07934e-06	down	7.25629	7.18906	8.02444	17.6078	13.8042	17.1275
AT1G14330	20.0257	46.1977	-1.20556	6.91669e-09	1.08935e-06	down	15.2965	20.3915	24.389	46.2315	43.0299	49.3317
AT1G14280	24.5751	56.978	-1.21287	7.30028e-09	1.1297e-06	down	18.2437	25.9736	29.508	60.4739	56.7507	53.7094
AT2G38310	45.0229	119.401	-1.40688	7.33971e-09	1.1297e-06	down	30.3375	43.9115	60.8197	129.334	107.741	121.127
AT5G62280	2.62132	7.59334	-1.53085	7.2749e-09	1.1297e-06	down	2.36687	2.75684	2.74026	9.03055	6.61087	7.1386
AT5G59580	0.85231	3.51852	-2.03278	8.51772e-09	1.30116e-06	down	0.70131	0.736954	1.11867	3.35588	2.63481	4.56486
AT5G05440	78.319	210.599	-1.42694	8.60323e-09	1.30442e-06	down	52.4233	75.9482	106.586	223.679	201.243	206.873
AT5G20150	5.71969	14.6941	-1.35969	8.81036e-09	1.32593e-06	down	4.40504	6.6023	6.15172	15.4208	12.37	16.2917
AT5G49700	1.9123	5.96197	-1.63537	9.78764e-09	1.46217e-06	down	1.35371	2.17592	2.20728	5.7607	5.5179	6.6073
AT3G25770	30.9626	86.718	-1.48551	1.06435e-08	1.57842e-06	down	22.0912	24.6174	46.1791	93.2693	83.466	83.4186
AT5G54170	120.583	262.031	-1.11964	1.09936e-08	1.61853e-06	down	116.32	106.185	139.245	248.578	270.476	267.038
AT5G39360	10.9467	22.8172	-1.05895	1.15803e-08	1.69264e-06	down	10.096	11.0698	11.6743	22.886	20.6384	24.9274
AT1G14920	5.69709	12.1542	-1.09181	1.17823e-08	1.70986e-06	down	4.79445	6.0708	6.22603	12.9478	11.4259	12.0887
AT1G76070	14.0107	28.8972	-1.04387	1.24133e-08	1.78866e-06	down	12.6681	14.2748	15.0891	28.6943	25.6815	32.3159
AT4G36670	7.7975	17.5364	-1.16824	1.35941e-08	1.93141e-06	down	6.09495	8.13289	9.16465	15.7003	17.3318	19.5771
AT1G62320	1.2126	3.87213	-1.6669	1.45949e-08	2.0592e-06	down	0.789576	1.51358	1.33465	4.16226	3.09062	4.36353
AT3G03990	35.1979	72.708	-1.04641	1.53973e-08	2.14266e-06	down	31.3925	37.15	37.0513	75.944	67.8297	74.3502
AT1G61667	19.028	40.7033	-1.09662	1.64716e-08	2.2636e-06	down	14.5943	21.7781	20.7115	43.4664	38.5343	40.1091
AT1G59710	10.704	26.3309	-1.2978	1.71228e-08	2.3348e-06	down	11.4234	6.8064	13.8823	25.4155	26.2145	27.3626
AT1G12540	0.0978584	1.05229	-3.29996	1.81158e-08	2.45373e-06	down	0.0622051	0.0952255	0.136145	1.26054	0.561755	1.33457
AT1G18710	7.29582	16.9604	-1.2159	1.87061e-08	2.50034e-06	down	5.88336	7.39433	8.60977	19.1728	16.8267	14.8817
AT5G67420	4.74202	10.7974	-1.18541	1.90609e-08	2.53111e-06	down	4.66683	3.98881	5.57043	12.3956	8.84401	11.1527
AT2G39130	6.43086	13.2444	-1.04115	2.08887e-08	2.75582e-06	down	5.76143	6.2094	7.32176	12.9645	12.9426	13.8262
AT1G75310	9.47737	20.6178	-1.12051	2.25476e-08	2.95548e-06	down	7.90452	9.306	11.2216	21.8876	17.8803	22.0854
AT2G30930	66.8856	163.277	-1.28743	2.30434e-08	3.00111e-06	down	48.8469	87.669	64.1409	141.7	177.272	170.859
AT1G02380	2.82105	8.18865	-1.53405	2.49014e-08	3.20204e-06	down	2.1941	2.92603	3.343	6.92142	8.08505	9.55948
AT1G72430	81.894	181.294	-1.14641	2.48162e-08	3.20204e-06	down	63.1422	87.3413	95.1986	190.126	178.298	175.459
AT1G76160	104.934	239.931	-1.19306	2.50815e-08	3.20491e-06	down	85.1069	99.5743	130.12	244.215	218.672	256.905
AT1G50040	11.674	36.5533	-1.64586	2.67775e-08	3.40024e-06	down	5.66694	12.8684	16.4868	37.0674	33.7324	38.86
AT4G05100	5.53397	20.1875	-1.86518	2.75287e-08	3.47392e-06	down	3.69622	3.44923	9.45645	19.7034	23.4238	17.4352
AT5G57887	11.9419	30.1293	-1.33441	2.98543e-08	3.74413e-06	down	12.2695	12.0607	11.4955	34.2034	22.1983	33.9861
AT3G17390	336.154	768.149	-1.19224	3.03407e-08	3.77062e-06	down	252.511	382.009	373.941	757.226	751.84	795.379
AT5G61570	1.66271	5.68873	-1.76845	3.5903e-08	4.42086e-06	down	0.903848	1.94734	2.13694	5.09346	5.96375	6.00898
AT5G63370	15.5673	32.0823	-1.04278	3.64578e-08	4.46213e-06	down	14.1036	18.1836	14.4148	29.4878	33.4073	33.3518
AT4G19530	10.7797	22.7801	-1.07876	4.0004e-08	4.78095e-06	down	9.2542	9.93245	13.1523	22.817	21.4993	24.0241
AT2G38250	13.2223	26.6153	-1.00873	4.07949e-08	4.84696e-06	down	11.1663	14.9219	13.5788	28.0633	22.9448	28.8377
AT2G22470	156.915	365.651	-1.22043	4.13269e-08	4.88161e-06	down	115.23	166.325	189.191	381.12	326.348	389.487
AT4G32790	6.36511	13.4366	-1.07672	4.23286e-08	4.95201e-06	down	5.02297	6.84444	7.22791	13.3718	13.7359	13.2021
AT4G32350	9.3619	19.7071	-1.07303	4.40968e-08	5.06166e-06	down	7.83463	9.43202	10.8191	21.9346	15.7676	21.4191
AT2G44230	21.7765	49.8655	-1.1949	4.66813e-08	5.32822e-06	down	17.7497	18.4888	29.0909	50.9688	51.0816	47.5462
AT5G62350	63.419	138.293	-1.12462	4.73554e-08	5.37497e-06	down	56.3445	61.1953	72.7173	159.636	112.042	143.202
AT1G72790	25.3141	64.062	-1.33918	4.87093e-08	5.46755e-06	down	15.8079	29.403	30.7315	60.1498	68.2455	63.7908
AT1G23480	11.0366	24.345	-1.14062	5.06906e-08	5.65868e-06	down	8.14945	11.4994	13.4608	24.3456	21.7556	26.9339
AT5G39580	25.254	57.5176	-1.18717	5.21005e-08	5.78429e-06	down	19.909	25.3627	30.4902	54.8865	46.686	70.9803
AT5G24030	45.454	126.291	-1.47406	6.49996e-08	7.13837e-06	down	29.6828	41.0602	65.6192	147.204	107.041	124.627
AT1G03457	5.74237	14.9737	-1.38116	6.74078e-08	7.32366e-06	down	3.74545	6.4137	7.06796	15.7111	11.5178	17.6921
AT3G02150	8.49996	17.3478	-1.02836	7.24939e-08	7.83435e-06	down	7.86337	8.23194	9.40457	18.0037	15.097	18.9427
AT3G22250	0.219519	1.71126	-2.90678	7.72459e-08	8.30373e-06	down	0.0963441	0.426657	0.135555	2.02797	1.18644	1.91936
AT1G25560	54.0038	113.969	-1.07737	8.52842e-08	9.07183e-06	down	43.2428	57.7293	61.0394	112.55	104.714	124.644
AT3G05650	2.56639	6.16027	-1.25998	8.91136e-08	9.42979e-06	down	2.67703	2.71002	2.31212	8.41152	5.00523	5.06407
AT1G14200	16.2802	33.5168	-1.04131	9.18911e-08	9.62347e-06	down	14.2058	19.0204	15.6143	32.3746	38.9754	29.2004
AT1G12450	8.89514	19.861	-1.15795	9.58884e-08	9.99059e-06	down	6.72498	8.59747	11.363	21.493	17.8596	20.2303
AT5G15120	3.08186	8.17612	-1.40471	1.09479e-07	1.12337e-05	down	3.23063	3.4607	2.55424	7.93174	6.54815	10.0485
AT5G25810	0.0910187	0.779973	-2.96718	1.17647e-07	1.20112e-05	down	0.0491407	0.188065	0.0358504	0.860773	0.706004	0.773141
AT1G22810	10.8046	25.2284	-1.22264	1.22966e-07	1.24293e-05	down	8.31827	11.1948	12.9007	27.3023	27.8477	20.5351
AT5G25450	3.83924	9.31526	-1.27657	1.37226e-07	1.37341e-05	down	3.8401	4.20767	3.46995	7.53593	9.55595	10.8539
AT5G58900	4.14409	9.68118	-1.22214	1.37122e-07	1.37341e-05	down	3.33714	3.80437	5.29074	10.7044	8.71282	9.6263
AT5G65630	24.4504	50.5789	-1.04837	1.45885e-07	1.44582e-05	down	20.7581	23.9545	28.6387	51.7683	44.7904	55.1781
AT2G23110	5.82292	14.3467	-1.29943	1.46625e-07	1.44611e-05	down	4.95607	6.03159	6.48111	11.4389	15.8378	15.7633
AT2G44810	0.230562	1.47024	-2.62136	1.50477e-07	1.46983e-05	down	0.170656	0.159197	0.361833	2.05514	0.788084	1.5675
AT3G05660	0.233229	1.16666	-2.27431	1.50319e-07	1.46983e-05	down	0.132351	0.231931	0.335405	0.976136	1.02937	1.49448
AT2G22860	61.228	139.992	-1.19295	1.55776e-07	1.50141e-05	down	43.6742	76.4833	63.5264	151.148	116.648	152.181
AT2G29450	304.181	639.843	-1.07276	1.55123e-07	1.50141e-05	down	293.077	257.013	362.454	682.969	593.796	642.766
AT2G17840	317.204	662.569	-1.06263	1.62667e-07	1.5516e-05	down	259.933	328.778	362.901	649.456	653.197	685.053
AT1G69150	0.27326	1.43085	-2.34672	2.07256e-07	1.94047e-05	down	0.18404	0.43434	0.201399	1.85418	1.13319	1.30519
AT2G23690	10.3424	25.8316	-1.31974	2.34068e-07	2.16162e-05	down	6.64761	10.876	13.5035	28.3402	21.054	28.1007
AT5G03520	57.2656	117.133	-1.03228	2.35508e-07	2.16507e-05	down	45.1653	63.8981	62.7336	115.804	112.986	122.61
AT1G57680	38.1361	88.4219	-1.21303	2.39403e-07	2.19097e-05	down	29.1691	43.0251	42.2141	63.9523	99.7365	101.577
AT2G39420	94.3179	197.123	-1.06341	2.44495e-07	2.22754e-05	down	74.1526	98.5529	110.248	193.263	202.891	195.215
AT1G33790	1.74661	4.69359	-1.42097	2.72413e-07	2.41686e-05	down	1.68381	2.32172	1.2343	4.41629	4.10741	5.55706
AT5G55090	1.30973	4.39869	-1.7401	2.89835e-07	2.56025e-05	down	0.924979	1.63383	1.37039	4.91204	3.27702	5.00701
AT2G46370	16.9473	35.7807	-1.07768	2.96565e-07	2.60836e-05	down	17.3447	15.151	18.3461	40.8591	26.5381	39.945
AT1G50460	22.4837	45.9926	-1.03219	3.19344e-07	2.7727e-05	down	18.5521	22.6672	26.2319	47.7982	40.1028	50.0769
AT3G30775	191.241	408.093	-1.09347	3.23981e-07	2.80099e-05	down	193.426	166.904	213.393	411.417	327.542	485.322
AT1G12710	2.38282	5.99256	-1.32686	3.3742e-07	2.90482e-05	down	2.3314	2.36085	2.45622	5.64003	5.3319	7.00574
AT3G20340	8.12538	18.5103	-1.18683	3.5818e-07	3.06406e-05	down	7.14679	8.67427	8.55508	18.0341	16.0932	21.4036
AT1G22530	64.2007	142.556	-1.15075	3.79012e-07	3.2085e-05	down	45.1691	72.7498	74.6831	130.99	139.331	157.347
AT2G42580	16.7813	34.0782	-1.02156	3.91081e-07	3.29693e-05	down	13.1858	18.2714	18.8866	31.9042	32.3497	37.9806
AT5G62920	1.83583	5.10139	-1.46945	4.14968e-07	3.46951e-05	down	1.4778	2.02904	2.00064	5.03904	4.57777	5.68735
AT2G28120	6.47048	13.3443	-1.04313	4.18799e-07	3.48719e-05	down	5.94469	6.35043	7.11633	15.0523	10.3635	14.6172
AT1G44350	53.0295	112.447	-1.08423	4.74842e-07	3.92169e-05	down	44.7852	46.0146	68.2888	116.413	103.909	117.019
AT5G65470	129.286	264.594	-1.03315	5.05073e-07	4.12111e-05	down	102.776	132.633	152.449	268.315	257.982	267.484
AT1G54740	17.8789	36.6355	-1.03457	5.32991e-07	4.33151e-05	down	14.2347	17.0346	22.3674	37.9653	30.6539	41.2872
AT5G06300	3.49657	8.49054	-1.27749	5.47365e-07	4.4306e-05	down	2.7328	4.15681	3.6001	8.78827	8.61696	8.06638
AT2G23770	2.19011	5.32214	-1.27714	5.50507e-07	4.43836e-05	down	2.08359	2.15809	2.32863	4.28466	4.73865	6.94312
AT3G44860	43.3611	99.3151	-1.19542	5.94928e-07	4.75872e-05	down	32.7126	49.3959	47.975	77.5539	130.515	89.8761
AT5G19110	24.9968	74.76	-1.58014	6.83357e-07	5.42335e-05	down	11.7661	30.2314	32.9927	85.0614	57.8911	81.3274
AT3G25870	3.08895	7.54006	-1.28471	7.40115e-07	5.85094e-05	down	2.51118	3.42257	3.3331	6.59388	8.37943	7.64689
AT1G61100	52.3533	105.936	-1.01671	7.43443e-07	5.85447e-05	down	41.0444	55.1917	60.8237	111.577	102.353	103.879
AT2G42870	3.19936	7.5185	-1.23008	7.66473e-07	6.01252e-05	down	3.15959	3.20331	3.23518	7.59636	7.64527	7.31386
AT5G02940	31.9315	67.1334	-1.07181	8.02642e-07	6.248e-05	down	28.3631	25.3497	42.0816	64.7637	69.7461	66.8903
AT4G04840	8.08066	18.3061	-1.17879	8.27132e-07	6.41406e-05	down	7.59527	6.0106	10.6361	17.6417	20.1068	17.1698
AT5G24660	6.77279	14.7402	-1.12078	8.39612e-07	6.48609e-05	down	7.13023	7.07006	6.11807	14.8051	15.7984	13.6171
AT4G37450	21.9542	45.2058	-1.04167	8.5828e-07	6.60079e-05	down	15.163	26.2474	24.4521	44.9997	48.6308	41.9868
AT5G59920	16.5641	35.5681	-1.10206	9.35429e-07	7.11802e-05	down	12.3022	15.1685	22.2216	37.9748	35.5075	33.222
AT1G31920	0.012144	2.09402	-6.57009	9.39272e-07	7.1206e-05	down	0	0	0.0364321	3.27027	0	3.0118
AT2G30600	26.9064	56.0878	-1.05946	9.51502e-07	7.18145e-05	down	21.9274	27.5602	31.2316	53.6246	46.4301	68.2087
AT4G21680	12.2714	25.7503	-1.06868	9.96414e-07	7.4427e-05	down	9.94462	12.9937	13.8759	24.6321	19.5466	33.0724
AT5G58670	19.3938	39.8427	-1.03834	1.09362e-06	7.99247e-05	down	14.668	23.775	19.7384	34.5031	43.121	41.904
AT2G19780	1.6527	4.31003	-1.37751	1.30766e-06	9.42116e-05	down	1.21243	1.69729	2.04838	4.5697	3.87672	4.48366
AT3G11402	0.561743	1.8957	-1.73688	1.3054e-06	9.42116e-05	down	0.554581	0.523759	0.606889	1.30876	2.18101	2.19733
AT4G28240	15.8941	55.3308	-1.79894	1.36285e-06	9.74967e-05	down	18.385	5.30623	23.991	55.8017	55.1834	55.0073
AT3G01080	2.55208	7.44655	-1.54119	1.51457e-06	0.000107593	down	1.81908	3.153	2.68417	4.57099	10.3913	7.37741
AT5G08135	13.8221	32.2844	-1.22326	1.59143e-06	0.000111879	down	13.3368	11.9906	16.1391	33.3007	29.1107	34.4419
AT5G60270	5.51227	11.5536	-1.06626	1.58649e-06	0.000111879	down	3.97441	5.51972	7.04268	11.2296	12.0176	11.4137
AT3G16690	7.64575	16.8145	-1.13595	1.63235e-06	0.00011436	down	5.14933	8.81884	8.96907	18.3639	14.2501	17.8296
AT2G02950	0.685287	2.07639	-1.58533	1.68259e-06	0.000117475	down	0.54542	0.684013	0.826427	2.24796	2.32498	1.65623
AT1G58200	19.0763	39.6095	-1.05367	1.71414e-06	0.000119268	down	21.2253	17.7316	18.2721	44.4152	27.8607	46.5525
AT4G28290	4.77134	10.2497	-1.10151	1.86745e-06	0.000127747	down	4.90323	3.80662	5.60418	10.1686	10.0444	10.5363
AT5G19100	0.959501	3.34576	-1.79133	2.01095e-06	0.000136644	down	0.575785	0.98392	1.3188	4.05637	2.60536	3.37556
AT4G25810	274.042	607.142	-1.14761	2.22219e-06	0.000149497	down	177.225	306.821	338.081	588.163	590.02	643.243
AT4G38400	61.043	138.67	-1.18363	2.53283e-06	0.000167621	down	39.8169	65.9316	77.3804	157.597	109.248	149.165
AT5G40380	5.3455	10.9382	-1.03161	2.83139e-06	0.000185566	down	4.01522	5.09335	6.92792	11.6324	10.1676	11.0147
AT5G40590	0.333807	1.56294	-2.19379	2.91511e-06	0.000188619	down	0.218897	0.434099	0.348426	1.64034	1.12726	1.92121
AT5G52400	1.36404	3.99565	-1.54361	3.3525e-06	0.000212189	down	0.9324	1.83705	1.32267	5.029	3.30288	3.65507
AT5G65613	7.30036	20.9043	-1.51647	3.42176e-06	0.000215232	down	5.39451	6.19356	10.313	20.8273	23.1308	18.7548
AT1G10020	20.8467	41.7404	-1.00128	3.49356e-06	0.000218653	down	14.8323	21.6523	26.0555	42.314	41.5652	41.342
AT1G62440	5.17332	14.4037	-1.47549	3.50844e-06	0.000218653	down	3.75644	3.25356	8.50997	16.1419	11.385	15.6842
AT3G27220	2.98818	6.08857	-1.02439	3.50044e-06	0.000218653	down	3.16494	2.86368	2.93591	5.75552	6.34956	6.16064
AT3G59940	26.2391	57.6011	-1.13408	3.53901e-06	0.000218925	down	17.3445	24.7632	36.6096	54.2218	58.9103	59.6712
AT5G17860	9.41464	19.033	-1.01475	4.05989e-06	0.000243318	down	10.0592	7.30178	10.8829	22.732	14.1791	20.188
AT4G06598	4.46675	10.115	-1.1774	4.08179e-06	0.000243911	down	3.70125	4.97731	4.72168	10.9354	8.31005	11.0996
AT1G65610	2.841	7.53766	-1.40456	4.27962e-06	0.000253496	down	1.54075	3.93229	3.04996	6.30978	8.62877	7.67442
AT2G33570	23.7238	48.209	-1.02266	4.3152e-06	0.00025486	down	16.9088	24.8183	29.4443	53.7778	43.3064	47.543
AT3G09440	20.5138	128.523	-2.64676	4.41333e-06	0.0002599	down	21.2552	20.1819	20.1043	42.9775	42.2486	300.342
AT2G28550	2.491	5.04783	-1.01601	7.06998e-06	0.00038927	down	2.19494	2.62668	2.6514	4.62763	5.35396	5.16191
AT1G12950	2.53854	7.26722	-1.51372	7.09199e-06	0.000389427	down	1.51187	4.1209	1.98284	7.9674	5.99757	7.8367
AT5G10410	0.683404	2.28784	-1.72851	7.83645e-06	0.000423439	down	0.717494	0.626066	0.706651	2.46924	1.60809	2.78621
AT1G05800	0.797205	2.56388	-1.67294	7.95513e-06	0.000428712	down	0.75349	0.8651	0.773025	2.65264	1.9911	3.0479
AT5G01740	2.69212	7.31427	-1.4386	8.01828e-06	0.000430972	down	2.12188	2.58472	3.36975	8.42543	6.02265	7.49474
AT4G17460	32.374	70.9489	-1.1317	8.07729e-06	0.000431859	down	19.4264	36.4249	41.2708	75.6253	62.0058	75.2155
AT4G15800	102.759	226.816	-1.14218	1.01161e-05	0.000528353	down	87.0365	110.483	110.758	268.853	275.313	136.282
AT4G15233	1.27491	2.66316	-1.05688	1.01685e-05	0.000529728	down	1.14872	1.61407	1.06193	2.36297	2.92623	2.70029
AT1G05420	0.515068	2.11498	-2.01687	1.02952e-05	0.000534954	down	0.662564	0.368083	0.514557	2.59864	1.316	2.43029
AT1G79310	6.0058	12.0595	-1.00454	1.07233e-05	0.000548778	down	4.51194	7.43521	6.07023	13.3865	10.2791	12.513
AT2G32100	0.388983	1.5487	-1.96594	1.22194e-05	0.000608484	down	0.392058	0.21528	0.559613	1.42267	1.74229	1.48113
AT2G22770	5.03504	10.2211	-1.02003	1.23252e-05	0.00061225	down	3.94113	4.96916	6.19483	10.4697	9.2478	10.946
AT3G04010	3.17273	6.75956	-1.0888	1.28018e-05	0.000632832	down	2.63963	2.54082	4.33776	6.25468	7.54092	6.48308
AT2G23670	2.36352	7.19731	-1.60243	1.45005e-05	0.000706493	down	1.56756	2.91559	2.60742	8.72199	5.13481	7.73513
AT1G28685	1.63837	4.39398	-1.41777	1.47959e-05	0.000714036	down	1.85475	2.02966	1.0307	3.98643	5.01418	4.18132
AT1G67190	3.8541	7.79744	-1.01472	1.47508e-05	0.000714036	down	3.38932	4.03201	4.14098	6.80227	7.61007	8.97997
AT5G54165	7.46447	18.2108	-1.28554	1.49982e-05	0.000719617	down	8.19516	8.05569	6.14255	14.9218	22.1885	17.522
AT5G46230	7.87908	15.8049	-1.00336	1.5317e-05	0.000731153	down	6.94969	7.69413	8.99343	14.549	17.6599	15.206
AT5G54145	1.22106	3.73099	-1.60351	1.53306e-05	0.000731153	down	1.20272	1.53429	0.926184	4.01611	3.59302	3.58382
AT2G23130	24.0903	52.3754	-1.12012	1.74714e-05	0.000816014	down	14.7713	23.4413	34.0582	60.8072	43.9451	52.3738
AT4G22610	2.78002	9.56881	-1.77957	1.74562e-05	0.000816014	down	1.18234	4.75114	2.40657	10.5989	8.03712	10.0704
AT1G16850	3.34914	7.70514	-1.1996	1.98334e-05	0.000911664	down	3.10794	3.5112	3.42829	8.55671	6.79727	7.76143
AT1G10550	2.88815	9.5205	-1.71742	2.06532e-05	0.000945069	down	1.06724	3.99285	3.60438	10.7312	7.09245	10.7379
AT4G26488	3.58399	7.30222	-1.02472	2.46155e-05	0.00109195	down	3.26203	3.09891	4.39105	7.73358	7.25201	6.92106
AT4G22030	0.191114	0.99917	-2.32708	2.49854e-05	0.00109876	down	0.127017	0.255204	0.191121	0.99793	0.449696	1.54988
AT4G23550	0.934322	2.87294	-1.61019	2.81291e-05	0.00120569	down	0.702104	0.861063	1.2398	2.89374	2.31873	3.40634
AT4G37770	17.7317	41.2703	-1.21831	2.81258e-05	0.00120569	down	11.4066	13.5394	28.2491	48.4113	36.4204	38.9792
AT2G37025	2.19575	4.49283	-1.02956	3.34126e-05	0.00139888	down	1.9974	2.30378	2.28606	4.04065	3.98293	5.45492
AT3G55720	0.418317	1.55265	-1.86724	3.34021e-05	0.00139888	down	0.443216	0.385505	0.42623	2.24189	0.860051	1.55601
AT4G09420	0.747344	1.98882	-1.40013	3.56957e-05	0.00147106	down	0.691834	0.768688	0.78151	2.15006	1.84134	1.97506
AT1G14550	0.350245	1.58102	-2.1429	4.0781e-05	0.00164394	down	0.219716	0.630653	0.200367	1.92433	0.992095	1.82663
AT3G59900	3.42952	7.68866	-1.1624	4.20494e-05	0.00169172	down	3.23775	3.53279	3.51801	8.7307	6.10798	8.2273
AT2G41940	3.57954	7.60281	-1.08463	4.21511e-05	0.00169246	down	3.19287	3.3453	4.20046	6.18425	8.74468	7.8795
AT3G10960	2.28518	4.93663	-1.10784	4.69434e-05	0.00186279	down	2.63252	2.29525	1.92777	5.36382	3.52214	5.92394
AT2G30830	0.62407	2.09293	-1.72969	4.94765e-05	0.00194809	down	0.475377	0.715174	0.68166	2.8038	1.31212	2.16288
AT4G12410	1.69849	4.49296	-1.39816	4.99756e-05	0.00196394	down	1.35944	1.75248	1.98354	5.06232	3.96494	4.45163
AT2G24850	41.604	116.872	-1.48991	5.40493e-05	0.00209565	down	24.9161	70.5909	29.305	68.729	154.671	127.216
AT4G29930	0.843572	2.23793	-1.39701	5.42315e-05	0.00209871	down	0.48876	1.22804	0.813917	2.18961	2.38138	2.1428
AT3G55940	1.51831	3.53056	-1.21204	5.79727e-05	0.00221944	down	1.23778	1.80327	1.51388	3.94404	2.66427	3.98336
AT1G18400	2.2277	4.77393	-1.09618	5.87822e-05	0.00224488	down	2.09153	2.31853	2.27302	4.81549	4.24536	5.26093
AT2G47550	4.36978	10.1757	-1.21762	6.33677e-05	0.00240643	down	2.43083	4.24475	6.43375	12.2322	8.60447	9.69057
AT2G40330	4.62831	9.30365	-1.00575	6.85786e-05	0.00257544	down	3.375	5.92354	4.58639	10.4326	7.9376	9.54072
AT3G23730	30.3563	64.1962	-1.08024	7.67479e-05	0.00283507	down	20.2538	29.0673	41.7477	72.6841	43.783	76.1216
AT1G72140	3.93614	10.217	-1.37386	7.99828e-05	0.00293323	down	2.05643	4.68228	5.06971	13.642	6.0038	11.0051
AT1G57560	1.81952	4.88655	-1.4203	8.09467e-05	0.0029473	down	1.60849	2.23967	1.6104	2.8563	5.98451	5.81884
AT5G57760	1.35266	4.7943	-1.8179	8.19312e-05	0.00297249	down	0.683319	1.61522	1.75946	6.46097	4.25689	3.66505
AT4G15230	0.309405	0.809571	-1.35948	9.35332e-05	0.00329344	down	0.282682	0.281598	0.363935	0.998031	0.824204	0.606478
AT3G12770	0.164355	0.687042	-1.99922	9.60824e-05	0.00335991	down	0.187703	0.0567121	0.24865	0.702368	0.510959	0.8478
AT4G04745	5.61321	12.982	-1.20816	0.000101257	0.00349871	down	3.13334	6.05726	7.64903	12.6106	12.8619	13.4735
AT5G01040	16.5141	36.5816	-1.14694	0.000102699	0.0035365	down	9.04883	25.4963	14.9972	41.919	35.0864	32.7395
AT3G13650	9.25173	18.969	-1.03505	0.000119261	0.0040183	down	7.79474	13.4812	6.47926	22.9033	16.7674	17.2364
AT5G05600	71.4367	222.538	-1.63918	0.00012156	0.00407547	down	29.2537	67.9941	117.062	279.095	109.525	278.994
AT5G42930	1.17631	3.28902	-1.47556	0.000131665	0.00434965	down	0.677306	1.61182	1.23981	3.52749	2.24442	4.09516
AT4G22620	1.58656	4.08783	-1.3599	0.00013232	0.00436419	down	1.5513	1.70475	1.50361	3.58506	3.32949	5.34894
AT3G09940	50.6818	126.861	-1.32354	0.000133962	0.00438277	down	30.0419	88.2882	33.7153	94.9056	152.655	133.023
AT5G53290	2.07431	4.30479	-1.04972	0.000137395	0.00446633	down	1.94211	1.96937	2.31145	4.04606	4.50394	4.36437
AT3G26420	2.94771	6.45152	-1.12739	0.000157989	0.00502327	down	3.48846	2.33916	3.0155	8.51794	3.5017	7.33492
AT5G01050	0.358737	1.22373	-1.74237	0.000182021	0.00564178	down	0.170199	0.521091	0.384921	1.40296	1.35537	0.912878
AT3G15370	0.2363	0.909525	-1.90047	0.000201358	0.00609687	down	0.191786	0.286252	0.230862	0.889257	0.543205	1.29611
AT5G21900	1.68678	3.55387	-1.07065	0.000208641	0.00627064	down	2.05939	1.31072	1.69022	3.2752	3.65246	3.73394
AT1G72360	7.28443	14.8644	-1.02796	0.000209426	0.0062715	down	4.52242	7.33738	9.99349	17.9376	12.9446	13.711
AT3G43250	5.24783	10.7543	-1.03371	0.000210584	0.00629183	down	4.42314	5.10409	6.21626	10.7576	7.82475	13.6804
AT4G26890	3.80534	7.72945	-1.02042	0.000222648	0.00660372	down	2.40685	4.12878	4.88039	8.28604	7.56675	7.33556
AT1G10480	0.589013	1.61134	-1.43653	0.000228796	0.00674667	down	0.4151	0.707193	0.644746	1.71085	1.38513	1.73805
AT4G37710	1.42714	5.74058	-2.00051	0.000242073	0.00707653	down	0.407853	2.49741	1.37616	7.45933	3.89246	5.86995
AT2G15760	2.52966	5.42711	-1.0982	0.000244643	0.00713114	down	1.86428	3.09172	2.63298	4.56424	6.29869	5.4184
AT1G28690	1.35397	2.96422	-1.1247	0.000286405	0.00809304	down	1.30836	1.30623	1.44733	3.03326	2.73203	3.12738
AT1G29640	3.96567	8.37533	-1.07667	0.000308105	0.00857833	down	3.20924	3.5638	5.12398	9.32395	8.09846	7.70357
AT4G24350	9.51509	19.848	-1.05992	0.000335123	0.00926353	down	6.29792	11.1615	11.0858	11.4911	25.894	22.1588
AT4G01070	1.9797	19.4494	-3.28984	0.000344192	0.00946272	down	1.55509	2.38474	1.99927	54.4794	2.04894	1.81983
AT1G02650	1.21671	3.00109	-1.2955	0.000351564	0.00960043	down	0.881694	1.37192	1.3965	3.31118	1.87152	3.82058
AT3G53590	0.25648	0.690303	-1.39395	0.000350866	0.00960043	down	0.187988	0.297701	0.28375	0.781477	0.67055	0.618883
AT5G03700	0.824333	2.12787	-1.35748	0.000362319	0.00978887	down	0.534612	0.85932	1.07907	2.25238	1.69708	2.43414
AT3G44870	1.72379	5.22878	-1.5953	0.00038023	0.010232	down	0.760723	3.13147	1.27917	6.34716	4.82108	4.51809
AT3G09450	0.74506	1.81788	-1.27551	0.000420211	0.0109901	down	0.530923	0.619724	1.08453	1.89645	1.89605	1.66113
AT1G57650	0.659567	1.7531	-1.39682	0.000449963	0.0115805	down	0.508769	0.845981	0.623951	1.11172	2.53852	1.60907
AT3G50140	0.159787	0.532286	-1.67533	0.000463826	0.0118984	down	0.0872065	0.222497	0.169657	0.419328	0.668211	0.509318
AT2G27505	0.95747	2.62884	-1.44761	0.000475714	0.012106	down	0.523695	1.20253	1.14618	2.89789	2.22135	2.76728
AT4G21920	2.42994	5.34664	-1.13448	0.000499906	0.0126483	down	2.21226	2.57019	2.50738	5.83437	4.21619	5.98935
AT4G31110	0.855508	2.29419	-1.41264	0.000536052	0.0134125	down	0.341343	1.17571	1.04947	2.4285	2.02168	2.43239
AT3G03265	6.26474	13.6885	-1.12639	0.000641288	0.015551	down	4.54549	5.44818	8.80055	13.5361	14.4553	13.0742
AT4G27970	2.59153	5.7226	-1.13983	0.000645189	0.0156051	down	1.54666	3.07157	3.15635	6.26691	3.51329	7.38761
AT1G20070	4.6395	10.2726	-1.14506	0.000755543	0.0177217	down	2.94681	3.98827	6.98342	13.8747	9.63695	7.30614
AT4G21850	42.4935	96.1427	-1.17774	0.00075744	0.0177217	down	22.9655	74.1151	30.4	72.7628	117.892	97.7729
AT2G30615	2.5271	5.3986	-1.09208	0.000777043	0.0180425	down	2.05705	1.76706	3.75718	4.94053	5.04811	6.20716
AT4G01140	1.64134	3.57737	-1.11929	0.000805527	0.0185344	down	1.46412	2.03247	1.42743	3.71664	2.47502	4.54043
AT3G47380	3.21299	6.49162	-1.0124	0.000831287	0.0190409	down	3.33645	2.35533	3.94718	6.48075	7.19022	5.80391
AT3G46700	2.18013	5.45775	-1.31993	0.000945515	0.0210868	down	0.776099	2.9377	2.82658	6.18502	4.76373	5.4245
AT4G10265	0.594883	1.74172	-1.53405	0.00101005	0.0223056	down	0.80829	0.386673	0.589685	2.01271	1.65896	1.5535
AT2G40180	0.662756	1.68545	-1.33351	0.001106	0.0241101	down	0.547337	0.925159	0.515773	1.40992	1.59144	2.05499
AT2G39030	19.4524	45.5355	-1.22662	0.00113736	0.0247406	down	6.73329	21.3291	30.2947	36.3193	52.7725	47.5147
AT4G36110	2.00585	4.32146	-1.10346	0.0012208	0.0263862	down	1.63163	1.92761	2.45833	3.70351	4.54272	4.71814
AT3G46280	3.84663	7.82336	-1.02229	0.00129676	0.0277621	down	2.31879	5.79685	3.42426	6.78236	6.83168	9.85603
AT5G17460	0.982587	2.05871	-1.05947	0.00130094	0.0278223	down	0.713444	1.15954	1.07478	1.87122	1.85984	2.44507
AT3G14260	0.484402	1.61695	-1.71841	0.00134733	0.0286336	down	0.35924	0.799125	0.294842	2.10525	0.746531	1.99907
AT4G21830	17.11	41.6851	-1.28419	0.00137447	0.0290583	down	7.23591	33.1223	10.9719	42.6391	39.1664	43.2496
AT4G29690	1.07905	2.74684	-1.33995	0.00141637	0.0297651	down	0.44772	1.40604	1.38338	2.98503	2.4162	2.83929
AT1G73830	1.13293	2.52629	-1.14998	0.00143525	0.0300839	down	1.07748	1.07671	1.24461	2.30267	2.40802	2.86817
AT5G43068	0.924338	2.97831	-1.67732	0.00144758	0.0302577	down	0.641191	1.57049	0.561335	4.53662	2.1056	2.29273
AT3G10020	1.74586	30.2013	-4.10484	0.00146266	0.0304476	down	0.736289	4.04397	0.457309	0.943198	88.4653	1.19542
AT4G33905	2.00206	4.23523	-1.07717	0.00148786	0.0308773	down	1.85964	1.63154	2.515	3.36228	5.61715	3.72627
AT1G65481	1.46459	3.27641	-1.1562	0.00155095	0.0318934	down	1.1936	1.49968	1.7005	2.83101	3.68853	3.30971
AT5G02750	0.462413	1.30764	-1.47984	0.00163234	0.0331642	down	0.641841	0.523596	0.221804	1.58374	0.9984	1.34079
AT1G53633	0.79809	2.37565	-1.56179	0.00176011	0.035059	down	0.394288	1.2449	0.755084	2.48839	1.94219	2.69637
AT3G49570	1.82256	4.00853	-1.13281	0.00203121	0.0394909	down	1.91208	1.92089	1.63471	3.97114	3.31122	4.74324
AT4G24415	1.12144	2.65592	-1.23648	0.00221881	0.0425193	down	0.871052	1.22231	1.27095	2.72579	2.54261	2.69936
AT2G47950	3.02873	6.78971	-1.16201	0.00239152	0.0449477	down	1.50489	4.50361	3.07768	7.98184	6.3799	6.00741
AT4G12500	2.53853	5.39698	-1.08516	0.00245424	0.0459483	down	2.07093	1.71721	3.82746	4.95527	5.78059	5.45508
AT5G56840	1.53017	3.27168	-1.09134	0.00256789	0.0475153	down	1.42133	1.24656	1.92263	3.7223	3.40337	2.68938
AT4G37410	9.9952	20.1682	-1.01204	0.00267233	0.0491792	down	4.13063	15.1759	10.6791	18.6472	19.5361	22.3212
