# Supplementary material for: Molecular Targets and Biological Functions of cAMP Signaling in Arabidopsis
Source: Biomolecules. 2021 May 3;11(5):688. doi: 10.3390/biom11050688 (PMC8147800; doi:10.3390/biom11050688)
Supplement: Supplementary file 1 [file biomolecules-11-00688-s001.zip › Supplementary Data S2.xlsx]

## Sheet: BP
Supplementary Data S2. Functional annotation of CRGs (GO terms using DAVID)
Category	Term	Count	%	PValue	Genes	List Total	Pop Hits	Pop Total	Fold Enrichment	Benjamini
GOTERM_BP_DIRECT	GO:0006355~regulation of transcription, DNA-templated	66	0.157143	2.48615e-06	AT2G41940, AT1G18400, AT3G21150, AT3G01080, AT5G51190, AT2G22770, AT4G14465, AT4G23810, AT5G64750, AT3G02150, AT5G65630, AT1G43160, AT1G46480, AT2G38250, AT3G10590, AT5G58900, AT4G16780, AT4G05100, AT1G73830, AT5G67480, AT1G57560, AT5G62920, AT5G56840, AT5G53290, AT5G57180, AT1G19210, AT2G28550, AT5G11060, AT5G67190, AT5G21960, AT4G06746, AT5G49700, AT3G02550, AT3G04930, AT3G25730, AT2G40130, AT1…	320	2119	18499	1.80058	0.000165315
GOTERM_BP_DIRECT	GO:0006351~transcription, DNA-templated	63	0.15	4.51116e-07	AT2G41940, AT1G18400, AT3G21150, AT3G01080, AT5G51190, AT2G22770, AT4G14465, AT4G23810, AT5G64750, AT3G02150, AT5G65630, AT1G43160, AT1G46480, AT2G38250, AT3G10590, AT5G58900, AT4G16780, AT1G73830, AT5G62920, AT2G42870, AT5G56840, AT5G53290, AT1G19210, AT2G28550, AT5G67190, AT5G21960, AT4G06746, AT4G25490, AT5G49700, AT3G04930, AT3G25730, AT5G67450, AT2G40130, AT1G22810, AT1G05420, AT4G32800, AT1…	320	1886	18499	1.93107	4.49979e-05
GOTERM_BP_DIRECT	GO:0045892~negative regulation of transcription, DNA-templated	6	0.0142857	0.0825472	AT2G42870, AT1G05420, AT2G32100, AT3G21150, AT4G16780, AT5G67450	320	134	18499	2.58848	0.636161
GOTERM_BP_DIRECT	GO:0009873~ethylene-activated signaling pathway	18	0.0428571	1.41425e-08	AT1G25560, AT1G22810, AT4G32800, AT5G53290, AT5G47230, AT5G51190, AT1G74930, AT1G19210, AT5G25350, AT2G28550, AT5G64750, AT5G67190, AT5G61600, AT1G43160, AT4G06746, AT5G21960, AT3G25730, AT1G72360	320	179	18499	5.81323	2.82142e-06
GOTERM_BP_DIRECT	GO:0009733~response to auxin	15	0.0357143	0.000541265	AT4G36110, AT4G22620, AT2G34650, AT5G20820, AT4G12410, AT1G72430, AT1G56150, AT3G59900, AT2G46370, AT4G03400, AT3G09870, AT4G27260, AT4G16780, AT5G67480, AT1G57560	320	290	18499	2.99014	0.0237168
GOTERM_BP_DIRECT	GO:0009737~response to abscisic acid	12	0.0285714	0.0809307	AT5G52310, AT5G27420, AT1G43160, AT4G05100, AT3G50970, AT1G56600, AT2G17840, AT4G24960, AT1G14920, AT5G58670, AT5G64750, AT3G63210	320	394	18499	1.76069	0.639548
GOTERM_BP_DIRECT	GO:0009738~abscisic acid-activated signaling pathway	10	0.0238095	0.00687877	AT2G40180, AT2G30020, AT5G46790, AT5G05440, AT5G51990, AT5G58670, AT2G38310, AT5G64750, AT5G67450, AT2G40330	320	195	18499	2.96458	0.178581
GOTERM_BP_DIRECT	GO:0009753~response to jasmonic acid	11	0.0261905	0.000384754	AT2G46370, AT2G39030, AT3G09940, AT1G61120, AT1G18710, AT1G43160, AT1G44350, AT4G05100, AT5G67480, AT2G24850, AT1G57560	320	156	18499	4.0763	0.0190103
GOTERM_BP_DIRECT	GO:0009695~jasmonic acid biosynthetic process	4	0.00952381	0.00882076	AT2G44810, AT1G05800, AT3G25770, AT3G25760	320	25	18499	9.2495	0.209961
GOTERM_BP_DIRECT	GO:0009694~jasmonic acid metabolic process	2	0.0047619	0.0991187	AT2G46370, AT1G44350	320	6	18499	19.2698	0.646972
GOTERM_BP_DIRECT	GO:0009739~response to gibberellin	5	0.0119048	0.0920397	AT5G67480, AT5G66350, AT4G19700, AT1G14920, AT1G57560	320	99	18499	2.91967	0.627615
GOTERM_BP_DIRECT	GO:0080037~negative regulation of cytokinin-activated signaling pathway	2	0.0047619	0.0991187	AT3G59940, AT1G15670	320	6	18499	19.2698	0.646972
GOTERM_BP_DIRECT	GO:0006952~defense response	21	0.05	0.0105314	AT2G39030, AT3G05660, AT3G25180, AT5G15410, AT3G16720, AT5G47230, AT3G05650, AT1G72940, AT2G31980, AT4G11340, AT1G72920, AT1G72910, AT4G09420, AT1G57650, AT5G53730, AT3G12920, AT3G13650, AT4G19530, AT4G23550, AT5G40380, AT1G61100	320	658	18499	1.84498	0.232042
GOTERM_BP_DIRECT	GO:0031347~regulation of defense response	7	0.0166667	0.000881503	AT3G12920, AT3G01080, AT5G24660, AT3G27960, AT4G19700, AT4G23810, AT3G02150	320	65	18499	6.22562	0.0345756
GOTERM_BP_DIRECT	GO:0010200~response to chitin	15	0.0357143	7.48745e-08	AT2G40140, AT5G27420, AT3G21150, AT3G16720, AT5G47230, AT5G51190, AT2G17040, AT4G23810, AT3G18710, AT5G47610, AT2G46400, AT3G53600, AT2G38470, AT4G23550, AT5G67450	320	133	18499	6.51985	9.95826e-06
GOTERM_BP_DIRECT	GO:0009409~response to cold	20	0.047619	1.16738e-06	AT3G17390, AT2G40140, AT1G50460, AT3G16690, AT5G47230, AT1G56600, AT2G17840, AT5G52310, AT1G43160, AT4G25470, AT1G56070, AT4G25490, AT3G25770, AT2G46240, AT2G38470, AT3G50970, AT4G24960, AT5G58670, AT3G26420, AT5G67450	320	299	18499	3.86685	9.31524e-05
GOTERM_BP_DIRECT	GO:0009631~cold acclimation	5	0.0119048	0.0114781	AT4G25470, AT4G25490, AT1G56070, AT3G50970, AT3G26420	320	51	18499	5.66759	0.23735
GOTERM_BP_DIRECT	GO:0034605~cellular response to heat	3	0.00714286	0.0734576	AT1G43160, AT5G61780, AT2G38470	320	26	18499	6.67031	0.613765
GOTERM_BP_DIRECT	GO:0009611~response to wounding	19	0.0452381	1.14265e-08	AT5G63450, AT2G44810, AT5G53750, AT1G74930, AT5G54170, AT1G72920, AT4G39980, AT4G24350, AT2G46370, AT2G27690, AT5G52310, AT1G61120, AT1G43160, AT2G30020, AT4G08170, AT4G10265, AT1G05800, AT5G67480, AT2G24850	320	199	18499	5.51949	4.55918e-06
GOTERM_BP_DIRECT	GO:0009651~response to salt stress	19	0.0452381	0.00195352	AT3G09940, AT5G02020, AT1G50460, AT5G24660, AT4G37530, AT4G01070, AT1G56600, AT1G14920, AT2G17840, AT5G52310, AT1G18710, AT1G43160, AT1G16850, AT5G61780, AT4G05100, AT2G38470, AT5G67480, AT5G24030, AT5G58670	320	484	18499	2.26938	0.0629494
GOTERM_BP_DIRECT	GO:0042538~hyperosmotic salinity response	5	0.0119048	0.0167491	AT5G52310, AT3G14440, AT4G24960, AT1G14920, AT5G67450	320	57	18499	5.071	0.312309
GOTERM_BP_DIRECT	GO:0006970~response to osmotic stress	11	0.0261905	5.05852e-05	AT1G50460, AT5G52310, AT3G16690, AT1G43160, AT1G58200, AT3G14440, AT3G58620, AT2G38470, AT2G42580, AT5G38710, AT5G64750	320	122	18499	5.21232	0.00287928
GOTERM_BP_DIRECT	GO:0009414~response to water deprivation	14	0.0333333	0.00116866	AT3G09940, AT5G52310, AT1G43160, AT3G30775, AT4G25490, AT3G14440, AT2G38470, AT3G50970, AT1G56600, AT5G24030, AT2G17840, AT5G38710, AT4G24960, AT5G58670	320	279	18499	2.90083	0.0415284
GOTERM_BP_DIRECT	GO:0006979~response to oxidative stress	11	0.0261905	0.0301015	AT4G21850, AT3G10020, AT3G20340, AT3G30775, AT1G14550, AT5G39580, AT4G21830, AT4G37530, AT4G04840, AT1G56600, AT2G29450	320	291	18499	2.18523	0.4405
GOTERM_BP_DIRECT	GO:2000377~regulation of reactive oxygen species metabolic process	3	0.00714286	0.0501842	AT2G46370, AT2G32010, AT1G14920	320	21	18499	8.25848	0.507565
GOTERM_BP_DIRECT	GO:0071456~cellular response to hypoxia	3	0.00714286	0.0734576	AT1G14550, AT4G37710, AT1G72360	320	26	18499	6.67031	0.613765
GOTERM_BP_DIRECT	GO:0034059~response to anoxia	2	0.0047619	0.0833068	AT1G72360, AT4G33070	320	5	18499	23.1238	0.629017
GOTERM_BP_DIRECT	GO:0009061~anaerobic respiration	3	0.00714286	0.0303324	AT3G27220, AT3G10020, AT5G15120	320	16	18499	10.8393	0.428011
GOTERM_BP_DIRECT	GO:0009641~shade avoidance	3	0.00714286	0.0268418	AT2G42870, AT4G16780, AT4G25260	320	15	18499	11.5619	0.418889
GOTERM_BP_DIRECT	GO:0007623~circadian rhythm	5	0.0119048	0.0869334	AT4G15248, AT5G52310, AT4G03390, AT2G17840, AT5G12050	320	97	18499	2.97986	0.624969
GOTERM_BP_DIRECT	GO:0009585~red, far-red light phototransduction	4	0.00952381	0.0915363	AT2G46370, AT1G14280, AT2G02950, AT4G16780	320	62	18499	3.72964	0.635053
GOTERM_BP_DIRECT	GO:0010017~red or far-red light signaling pathway	3	0.00714286	0.0685644	AT3G21150, AT2G02950, AT4G16780	320	25	18499	6.93712	0.599164
GOTERM_BP_DIRECT	GO:0043161~proteasome-mediated ubiquitin-dependent protein catabolic process	10	0.0238095	0.0340374	AT3G27220, AT5G47610, AT1G14330, AT3G12920, AT1G15670, AT5G67480, AT5G02750, AT4G19700, AT4G22030, AT2G30600	320	256	18499	2.25818	0.437704
GOTERM_BP_DIRECT	GO:0030162~regulation of proteolysis	5	0.0119048	0.00330856	AT3G27220, AT1G14330, AT1G15670, AT5G67480, AT2G30600	320	36	18499	8.02908	0.0967138
GOTERM_BP_DIRECT	GO:0030091~protein repair	3	0.00714286	0.0303324	AT4G21850, AT4G21830, AT4G04840	320	16	18499	10.8393	0.428011
GOTERM_BP_DIRECT	GO:0080163~regulation of protein serine/threonine phosphatase activity	3	0.00714286	0.0417901	AT5G46790, AT5G05440, AT2G38310	320	19	18499	9.1278	0.480611
GOTERM_BP_DIRECT	GO:0006402~mRNA catabolic process	3	0.00714286	0.0303324	AT1G77680, AT1G03457, AT5G61780	320	16	18499	10.8393	0.428011
GOTERM_BP_DIRECT	GO:0052696~flavonoid glucuronidation	6	0.0142857	0.0446397	AT3G22250, AT3G46700, AT4G27560, AT5G59580, AT4G01070, AT1G22360	320	112	18499	3.09693	0.490769
GOTERM_BP_DIRECT	GO:0006537~glutamate biosynthetic process	2	0.0047619	0.0833068	AT3G30775, AT5G38710	320	5	18499	23.1238	0.629017
GOTERM_BP_DIRECT	GO:0006562~proline catabolic process	2	0.0047619	0.0341919	AT3G30775, AT5G38710	320	2	18499	57.8094	0.426071
GOTERM_BP_DIRECT	GO:0010133~proline catabolic process to glutamate	2	0.0047619	0.0508483	AT3G30775, AT5G38710	320	3	18499	38.5396	0.500467
GOTERM_BP_DIRECT	GO:0010508~positive regulation of autophagy	2	0.0047619	0.0991187	AT2G46240, AT2G38470	320	6	18499	19.2698	0.646972
GOTERM_BP_DIRECT	GO:0055085~transmembrane transport	9	0.0214286	0.0310312	AT1G77110, AT1G16370, AT3G45060, AT4G27970, AT5G17860, AT1G58200, AT4G24570, AT5G24030, AT5G61810	320	212	18499	2.45417	0.421232
GOTERM_BP_DIRECT	GO:0006811~ion transport	5	0.0119048	0.0177522	AT1G16370, AT4G27970, AT1G58200, AT1G10090, AT1G62320	320	58	18499	4.98357	0.313497
GOTERM_BP_DIRECT	GO:0015706~nitrate transport	3	0.00714286	0.0459158	AT3G45650, AT3G45060, AT3G27170	320	20	18499	8.67141	0.488188
GOTERM_BP_DIRECT	GO:0001944~vasculature development	3	0.00714286	0.0734576	AT5G61600, AT1G46480, AT1G74930	320	26	18499	6.67031	0.613765
GOTERM_BP_DIRECT	GO:0042546~cell wall biogenesis	4	0.00952381	0.0848734	AT4G25810, AT2G33570, AT3G23730, AT1G10550	320	60	18499	3.85396	0.625818

## Sheet: MF
Supplementary Data S2. Functional annotation of CRGs (GO terms using DAVID)
Category	Term	Count	%	PValue	Genes	List Total	Pop Hits	Pop Total	Fold Enrichment	Benjamini
GOTERM_MF_DIRECT	GO:0003700~transcription factor activity, sequence-specific DNA binding	62	0.147619	1.14663e-10	AT2G41940, AT1G18400, AT3G21150, AT5G51190, AT3G01080, AT4G14465, AT2G22770, AT4G23810, AT5G64750, AT3G02150, AT1G43160, AT1G46480, AT2G38250, AT3G10590, AT5G58900, AT4G16780, AT4G05100, AT1G73830, AT1G57560, AT5G44260, AT5G56840, AT5G53290, AT1G19210, AT2G28550, AT5G11060, AT5G67190, AT5G21960, AT4G06746, AT4G25490, AT5G49700, AT3G25730, AT5G67450, AT1G22810, AT4G32800, AT1G12540, AT1G62975, AT1…	274	1711	18171	2.40309	2.74045e-08
GOTERM_MF_DIRECT	GO:0003677~DNA binding	50	0.119048	0.000649464	AT1G18400, AT5G51190, AT2G22770, AT4G23810, AT5G64750, AT3G02150, AT5G65630, AT1G43160, AT1G46480, AT3G10590, AT5G58900, AT4G16780, AT4G05100, AT1G73830, AT1G57560, AT5G44260, AT5G56840, AT5G53290, AT1G19210, AT2G28550, AT5G11060, AT5G67190, AT5G21960, AT4G06746, AT4G25490, AT3G25730, AT5G67450, AT1G22810, AT4G32800, AT1G12540, AT1G62975, AT5G61600, AT3G26420, AT1G72360, AT1G25560, AT2G40140, AT5…	274	2047	18171	1.61987	0.0504408
GOTERM_MF_DIRECT	GO:0043565~sequence-specific DNA binding	23	0.0547619	0.00058533	AT4G32800, AT4G17460, AT5G47230, AT3G01080, AT3G50650, AT5G51990, AT1G14920, AT4G23810, AT5G01380, AT4G37790, AT2G46400, AT1G18710, AT4G25470, AT2G30615, AT2G38250, AT3G53600, AT4G16780, AT4G05100, AT2G38470, AT4G23550, AT3G25730, AT1G57560, AT5G67450	274	676	18171	2.25637	0.0675758
GOTERM_MF_DIRECT	GO:0044212~transcription regulatory region DNA binding	13	0.0309524	0.00334262	AT2G41940, AT4G32800, AT1G10480, AT1G18710, AT5G61600, AT2G46400, AT2G30615, AT3G53600, AT2G38470, AT4G05100, AT3G25730, AT1G57560, AT5G67450	274	319	18171	2.70259	0.124859
GOTERM_MF_DIRECT	GO:0005215~transporter activity	12	0.0285714	0.0153119	AT1G77110, AT1G72140, AT5G56160, AT3G10960, AT1G12950, AT3G45650, AT4G27970, AT5G54170, AT4G21680, AT5G44050, AT5G24030, AT1G22530	274	344	18171	2.3134	0.369335
GOTERM_MF_DIRECT	GO:0003824~catalytic activity	10	0.0238095	0.0816991	AT2G46370, AT2G34770, AT5G65280, AT4G32790, AT4G37770, AT4G08170, AT2G39420, AT4G28940, AT3G03990, AT4G24350	274	349	18171	1.90022	0.603829
GOTERM_MF_DIRECT	GO:0016758~transferase activity, transferring hexosyl groups	7	0.0166667	0.0375434	AT3G22250, AT3G46700, AT4G27560, AT5G59580, AT4G01070, AT1G56600, AT1G22360	274	164	18171	2.83063	0.43538
GOTERM_MF_DIRECT	GO:0042803~protein homodimerization activity	7	0.0166667	0.0534674	AT2G19570, AT2G42870, AT5G03150, AT4G16780, AT5G46790, AT2G38310, AT2G40330	274	179	18171	2.59342	0.499031
GOTERM_MF_DIRECT	GO:0080043~quercetin 3-O-glucosyltransferase activity	6	0.0142857	0.0227139	AT3G22250, AT3G46700, AT4G27560, AT5G59580, AT4G01070, AT1G22360	274	107	18171	3.71874	0.3672
GOTERM_MF_DIRECT	GO:0080044~quercetin 7-O-glucosyltransferase activity	6	0.0142857	0.0211289	AT3G22250, AT3G46700, AT4G27560, AT5G59580, AT4G01070, AT1G22360	274	105	18171	3.78957	0.399739
GOTERM_MF_DIRECT	GO:0004857~enzyme inhibitor activity	5	0.0119048	0.0324133	AT3G47380, AT5G62360, AT5G62350, AT4G25260, AT2G47550	274	80	18171	4.14484	0.408449
GOTERM_MF_DIRECT	GO:0008194~UDP-glycosyltransferase activity	5	0.0119048	0.065883	AT3G22250, AT3G46700, AT5G59580, AT4G01070, AT1G22360	274	101	18171	3.28305	0.539597
GOTERM_MF_DIRECT	GO:0046910~pectinesterase inhibitor activity	5	0.0119048	0.088533	AT3G47380, AT5G62360, AT5G62350, AT4G25260, AT2G47550	274	112	18171	2.9606	0.587785
GOTERM_MF_DIRECT	GO:0031625~ubiquitin protein ligase binding	5	0.0119048	0.0863357	AT3G27220, AT1G14330, AT1G15670, AT5G67480, AT2G30600	274	111	18171	2.98728	0.608689
GOTERM_MF_DIRECT	GO:0004864~protein phosphatase inhibitor activity	4	0.00952381	0.00162486	AT5G46790, AT5G05440, AT2G38310, AT2G40330	274	16	18171	16.5794	0.092593
GOTERM_MF_DIRECT	GO:0010427~abscisic acid binding	4	0.00952381	0.00271954	AT5G46790, AT5G05440, AT2G38310, AT2G40330	274	19	18171	13.9616	0.122055
GOTERM_MF_DIRECT	GO:0016722~oxidoreductase activity, oxidizing metal ions	4	0.00952381	0.025026	AT5G01040, AT5G01050, AT1G76160, AT4G38420	274	42	18171	6.31595	0.37246
GOTERM_MF_DIRECT	GO:0004872~receptor activity	4	0.00952381	0.0220124	AT5G46790, AT5G05440, AT2G38310, AT2G40330	274	40	18171	6.63175	0.383448
GOTERM_MF_DIRECT	GO:0033743~peptide-methionine (R)-S-oxide reductase activity	3	0.00714286	0.00934627	AT4G21850, AT4G21830, AT4G04840	274	10	18171	19.8953	0.274293
GOTERM_MF_DIRECT	GO:0002020~protease binding	3	0.00714286	0.0181681	AT3G09440, AT2G31980, AT1G22530	274	14	18171	14.2109	0.385472
GOTERM_MF_DIRECT	GO:0003712~transcription cofactor activity	3	0.00714286	0.049965	AT2G42870, AT5G61780, AT5G67480	274	24	18171	8.28969	0.493673
GOTERM_MF_DIRECT	GO:0016762~xyloglucan:xyloglucosyl transferase activity	3	0.00714286	0.0876201	AT4G25810, AT3G23730, AT1G10550	274	33	18171	6.02887	0.598749
GOTERM_MF_DIRECT	GO:0004657~proline dehydrogenase activity	2	0.0047619	0.029823	AT3G30775, AT5G38710	274	2	18171	66.3175	0.403614
GOTERM_MF_DIRECT	GO:0052740~1-acyl-2-lysophosphatidylserine acylhydrolase activity	2	0.0047619	0.0444005	AT2G44810, AT1G05800	274	3	18171	44.2117	0.471916
GOTERM_MF_DIRECT	GO:0052739~phosphatidylserine 1-acylhydrolase activity	2	0.0047619	0.0444005	AT2G44810, AT1G05800	274	3	18171	44.2117	0.471916
GOTERM_MF_DIRECT	GO:0046423~allene-oxide cyclase activity	2	0.0047619	0.0587597	AT3G25770, AT3G25760	274	4	18171	33.1588	0.515023

## Sheet: CC
Supplementary Data S2. Functional annotation of CRGs (GO terms using DAVID)
Category	Term	Count	%	PValue	Genes	List Total	Pop Hits	Pop Total	Fold Enrichment	Benjamini
GOTERM_CC_DIRECT	GO:0005634~nucleus	183	0.435714	0.00143315	AT2G19570, AT3G21150, AT3G20340, AT5G51190, AT2G22770, AT4G14465, AT5G25350, AT1G59710, AT3G59900, AT3G25870, AT4G23810, AT1G57650, AT5G47610, AT1G43160, AT5G25280, AT4G08170, AT1G46480, AT5G58900, AT4G16780, AT5G05440, AT4G19530, AT4G05100, AT2G38310, AT5G62920, AT3G49940, AT1G30190, AT5G56840, AT5G53290, AT5G57180, AT5G20150, AT5G55150, AT3G63210, AT1G51090, AT4G15233, AT5G55090, AT4G06598, AT2…	393	9796	25147	1.19535	0.109674
GOTERM_CC_DIRECT	GO:0005886~plasma membrane	77	0.183333	0.00644619	AT3G17390, AT5G65280, AT1G14280, AT1G23730, AT3G09440, AT3G45060, AT2G23770, AT4G30250, AT5G44050, AT5G03700, AT1G22530, AT3G50140, AT2G32010, AT1G56070, AT5G05440, AT4G37450, AT3G09450, AT2G38310, AT1G61100, AT5G60270, AT5G52882, AT3G05650, AT2G15760, AT4G27970, AT3G27960, AT3G53590, AT2G22470, AT4G36670, AT4G15233, AT1G58200, AT4G15230, AT5G09400, AT3G05660, AT4G31110, AT4G03390, AT5G15410, AT1…	393	3702	25147	1.33091	0.230424
GOTERM_CC_DIRECT	GO:0009505~plant-type cell wall	10	0.0238095	0.0877267	AT1G76160, AT1G62440, AT4G15800, AT5G44130, AT4G16563, AT5G39580, AT4G38400, AT4G38420, AT2G47550, AT4G24350	393	341	25147	1.87646	0.710474
GOTERM_CC_DIRECT	GO:0043231~intracellular membrane-bounded organelle	7	0.0166667	0.0728755	AT2G27690, AT3G22250, AT3G46700, AT4G27560, AT5G59580, AT4G01070, AT1G22360	393	186	25147	2.40812	0.706481
GOTERM_CC_DIRECT	GO:0000932~cytoplasmic mRNA processing body	4	0.00952381	0.0451771	AT5G44260, AT1G77680, AT5G61780, AT3G63210	393	51	25147	5.01861	0.607864
GOTERM_CC_DIRECT	GO:0010494~cytoplasmic stress granule	3	0.00714286	0.0418759	AT5G44260, AT5G61780, AT3G63210	393	21	25147	9.14104	0.684944
