# Supplementary material for: Molecular Targets and Biological Functions of cAMP Signaling in Arabidopsis
Source: Biomolecules. 2021 May 3;11(5):688. doi: 10.3390/biom11050688 (PMC8147800; doi:10.3390/biom11050688)
Supplement: Supplementary file 1 [file biomolecules-11-00688-s001.zip › Supplementary Data S3.xlsx]

## Sheet: up-regulated CRGs
Supplementary Data S3. Functional annotation of up-regulated CRGs （GO terms and KEGG pathways using DAVID)
Category	Term	Count	%	PValue	Genes	List Total	Pop Hits	Pop Total	Fold Enrichment	Benjamini
GOTERM_BP_DIRECT	GO:0010200~response to chitin	13	13.6842	1.45874e-13	AT2G40140, AT5G27420, AT3G21150, AT5G47230, AT5G51190, AT3G16720, AT2G17040, AT4G23810, AT3G18710, AT5G47610, AT2G46400, AT2G38470, AT5G67450	74	133	18499	24.4348	2.01319e-11
GOTERM_MF_DIRECT	GO:0003700~transcription factor activity, sequence-specific DNA binding	23	24.2105	1.96225e-08	AT2G40140, AT5G53210, AT3G21150, AT5G47230, AT5G51190, AT1G74930, AT4G14465, AT1G19210, AT2G17040, AT5G51990, AT4G23810, AT5G11060, AT5G03150, AT5G61600, AT2G46400, AT4G25470, AT5G21960, AT1G46480, AT3G10590, AT4G25490, AT2G38470, AT5G66350, AT5G67450	63	1711	18171	3.87718	1.43244e-06
GOTERM_BP_DIRECT	GO:0006355~regulation of transcription, DNA-templated	26	27.3684	2.45157e-07	AT2G40130, AT3G21150, AT5G51190, AT4G14465, AT4G23810, AT1G61470, AT5G61600, AT2G46400, AT1G46480, AT3G10590, AT2G38470, AT2G40140, AT5G53210, AT5G57180, AT5G47230, AT1G74930, AT1G19210, AT2G17040, AT5G51990, AT5G11060, AT5G03150, AT4G25470, AT5G21960, AT5G36740, AT5G66350, AT3G04930	74	2119	18499	3.06732	1.69157e-05
GOTERM_BP_DIRECT	GO:0006351~transcription, DNA-templated	24	25.2632	4.98537e-07	AT2G40130, AT5G53210, AT3G21150, AT5G47230, AT5G51190, AT1G74930, AT4G14465, AT1G19210, AT2G17040, AT5G51990, AT4G23810, AT1G61470, AT5G03150, AT5G61600, AT2G46400, AT4G25470, AT5G21960, AT1G46480, AT3G10590, AT4G25490, AT2G38470, AT5G66350, AT3G04930, AT5G67450	74	1886	18499	3.18116	2.29324e-05
GOTERM_MF_DIRECT	GO:0003677~DNA binding	20	21.0526	3.16781e-05	AT2G40140, AT5G53210, AT5G47230, AT5G51190, AT1G74930, AT1G19210, AT2G17040, AT5G51990, AT4G23810, AT5G11060, AT5G03150, AT5G61600, AT4G25470, AT1G46480, AT5G21960, AT5G36740, AT4G25490, AT3G10590, AT5G66350, AT5G67450	63	2047	18171	2.81806	0.0011556
GOTERM_BP_DIRECT	GO:0009409~response to cold	8	8.42105	0.000175829	AT2G40140, AT4G25470, AT5G47230, AT4G25490, AT1G56070, AT2G38470, AT1G56600, AT5G67450	74	299	18499	6.6886	0.00604827
GOTERM_BP_DIRECT	GO:0009873~ethylene-activated signaling pathway	6	6.31579	0.00070793	AT5G61600, AT5G51190, AT5G21960, AT5G47230, AT1G74930, AT1G19210	74	179	18499	8.37944	0.019356
GOTERM_BP_DIRECT	GO:0001944~vasculature development	3	3.15789	0.00469511	AT5G61600, AT1G46480, AT1G74930	74	26	18499	28.8446	0.102589
GOTERM_CC_DIRECT	GO:0005634~nucleus	48	50.5263	0.00545252	AT2G40130, AT3G21150, AT5G51190, AT2G34650, AT4G14465, AT3G15670, AT1G56600, AT4G23810, AT1G61470, AT2G32010, AT4G15248, AT5G47610, AT2G46400, AT5G61600, AT1G46480, AT3G10590, AT5G41761, AT2G38470, AT1G29240, AT2G40140, AT5G02020, AT1G30190, AT5G53210, AT5G57180, AT5G47230, AT3G16720, AT1G74930, AT5G20820, AT1G19210, AT3G28620, AT2G17040, AT5G55150, AT5G51990, AT3G63210, AT5G56880, AT5G11060, AT5…	90	9796	25147	1.3691	0.19203
GOTERM_BP_DIRECT	GO:0006952~defense response	8	8.42105	0.0149558	AT5G53730, AT3G16720, AT5G47230, AT2G31980, AT1G72940, AT1G72920, AT4G11340, AT1G72910	74	658	18499	3.03935	0.257009
GOTERM_BP_DIRECT	GO:0009631~cold acclimation	3	3.15789	0.0172877	AT4G25470, AT4G25490, AT1G56070	74	51	18499	14.7051	0.25979
GOTERM_BP_DIRECT	GO:0009733~response to auxin	5	5.26316	0.0276965	AT3G09870, AT2G34650, AT4G27260, AT5G20820, AT1G56150	74	290	18499	4.31011	0.349928
GOTERM_BP_DIRECT	GO:0009734~auxin-activated signaling pathway	4	4.21053	0.0392895	AT1G77110, AT2G34650, AT5G66350, AT1G56150	74	190	18499	5.26287	0.395195
GOTERM_BP_DIRECT	GO:0010120~camalexin biosynthetic process	2	2.10526	0.0387774	AT4G27260, AT2G38470	74	10	18499	49.9973	0.420611
GOTERM_BP_DIRECT	GO:0045893~positive regulation of transcription, DNA-templated	4	4.21053	0.0544514	AT5G61600, AT5G47230, AT4G25490, AT4G23810	74	217	18499	4.60805	0.474752
GOTERM_MF_DIRECT	GO:0043565~sequence-specific DNA binding	7	7.36842	0.0273586	AT2G46400, AT4G25470, AT5G47230, AT2G38470, AT5G51990, AT5G67450, AT4G23810	63	676	18171	2.98669	0.490845
GOTERM_MF_DIRECT	GO:0008270~zinc ion binding	10	10.5263	0.0457514	AT1G23730, AT4G15248, AT5G47610, AT5G03150, AT5G27420, AT3G21150, AT3G16720, AT5G36740, AT3G28620, AT5G67450	63	1393	18171	2.07056	0.495271
GOTERM_MF_DIRECT	GO:0046872~metal ion binding	11	11.5789	0.0442668	AT1G61470, AT2G40140, AT5G03150, AT2G30020, AT4G19170, AT3G14440, AT5G52750, AT5G66350, AT1G56600, AT5G67450, AT3G63210	63	1606	18171	1.97554	0.562332
GOTERM_BP_DIRECT	GO:0009414~response to water deprivation	4	4.21053	0.0980309	AT4G25490, AT3G14440, AT2G38470, AT1G56600	74	279	18499	3.58404	0.665542
GOTERM_MF_DIRECT	GO:0044212~transcription regulatory region DNA binding	4	4.21053	0.0953274	AT5G61600, AT2G46400, AT2G38470, AT5G67450	63	319	18171	3.61666	0.70444
KEGG_PATHWAY	ath00906:Carotenoid biosynthesis	2	2.10526	0.0539235	AT4G19170, AT3G14440	10	29	4727	32.6	0.392794
KEGG_PATHWAY	ath04075:Plant hormone signal transduction	3	3.15789	0.0868515	AT3G09870, AT4G27260, AT1G56150	10	265	4727	5.35132	0.33559

## Sheet: down-regulated CRGs
	Supplementary Data S3. Functional annotation of down-regulated CRGs （GO terms and KEGG pathways using DAVID)
Category	Term	Count	%	PValue	Genes	List Total	Pop Hits	Pop Total	Fold Enrichment	Benjamini
GOTERM_BP_DIRECT	GO:0009611~response to wounding	16	4.92308	6.86301e-08	AT5G63450, AT2G44810, AT5G53750, AT5G54170, AT4G39980, AT4G24350, AT2G46370, AT2G27690, AT5G52310, AT1G61120, AT1G43160, AT4G08170, AT4G10265, AT1G05800, AT5G67480, AT2G24850	246	199	18499	6.04617	2.35399e-05
GOTERM_BP_DIRECT	GO:0009873~ethylene-activated signaling pathway	12	3.69231	2.76123e-05	AT1G25560, AT1G22810, AT5G67190, AT4G32800, AT5G53290, AT1G43160, AT4G06746, AT5G25350, AT3G25730, AT2G28550, AT5G64750, AT1G72360	246	179	18499	5.04129	0.00472438
GOTERM_BP_DIRECT	GO:0009753~response to jasmonic acid	11	3.38462	4.46865e-05	AT2G46370, AT2G39030, AT3G09940, AT1G61120, AT1G18710, AT1G43160, AT1G44350, AT4G05100, AT5G67480, AT2G24850, AT1G57560	246	156	18499	5.30251	0.00509624
GOTERM_MF_DIRECT	GO:0003700~transcription factor activity, sequence-specific DNA binding	39	12	6.42356e-05	AT2G41940, AT1G22810, AT4G32800, AT1G18400, AT3G01080, AT1G12540, AT2G22770, AT1G14920, AT1G62975, AT5G64750, AT3G02150, AT1G10480, AT1G43160, AT2G38250, AT5G58900, AT4G16780, AT4G05100, AT1G73830, AT1G57560, AT1G72360, AT1G25560, AT5G25810, AT5G44260, AT5G56840, AT4G17460, AT5G53290, AT1G69570, AT3G50650, AT2G28550, AT4G29930, AT5G01380, AT4G37790, AT5G67190, AT1G18710, AT3G53600, AT4G06746, AT5…	211	1711	18171	1.96296	0.0135894
GOTERM_BP_DIRECT	GO:0006970~response to osmotic stress	9	2.76923	0.000222019	AT1G50460, AT5G52310, AT3G16690, AT1G43160, AT1G58200, AT3G58620, AT2G42580, AT5G38710, AT5G64750	246	122	18499	5.54748	0.0188601
GOTERM_MF_DIRECT	GO:0004864~protein phosphatase inhibitor activity	4	1.23077	0.000762529	AT5G46790, AT5G05440, AT2G38310, AT2G40330	211	16	18171	21.5296	0.0780279
GOTERM_BP_DIRECT	GO:0030162~regulation of proteolysis	5	1.53846	0.00126754	AT3G27220, AT1G14330, AT1G15670, AT5G67480, AT2G30600	246	36	18499	10.4443	0.0833309
GOTERM_MF_DIRECT	GO:0010427~abscisic acid binding	4	1.23077	0.00128616	AT5G46790, AT5G05440, AT2G38310, AT2G40330	211	19	18171	18.1302	0.0873257
GOTERM_BP_DIRECT	GO:0009409~response to cold	12	3.69231	0.00221337	AT3G17390, AT1G50460, AT5G52310, AT3G16690, AT1G43160, AT2G46240, AT3G25770, AT3G50970, AT2G17840, AT4G24960, AT3G26420, AT5G58670	246	299	18499	3.01803	0.0906301
GOTERM_BP_DIRECT	GO:0031347~regulation of defense response	6	1.84615	0.00169236	AT3G12920, AT3G01080, AT5G24660, AT3G27960, AT4G19700, AT3G02150	246	65	18499	6.94146	0.0922886
GOTERM_BP_DIRECT	GO:0009651~response to salt stress	16	4.92308	0.00208176	AT3G09940, AT1G50460, AT5G24660, AT4G37530, AT4G01070, AT1G14920, AT2G17840, AT5G52310, AT1G18710, AT1G43160, AT1G16850, AT5G61780, AT4G05100, AT5G67480, AT5G24030, AT5G58670	246	484	18499	2.48592	0.0970723
GOTERM_BP_DIRECT	GO:0009695~jasmonic acid biosynthetic process	4	1.23077	0.0042552	AT2G44810, AT1G05800, AT3G25770, AT3G25760	246	25	18499	12.0319	0.149998
GOTERM_CC_DIRECT	GO:0005886~plasma membrane	64	19.6923	0.00235346	AT3G17390, AT5G65280, AT1G14280, AT3G09440, AT3G45060, AT2G23770, AT5G44050, AT5G03700, AT1G22530, AT3G50140, AT5G05440, AT4G37450, AT3G09450, AT2G38310, AT1G61100, AT5G60270, AT5G52882, AT3G05650, AT4G27970, AT2G15760, AT3G27960, AT3G53590, AT2G22470, AT4G36670, AT4G15233, AT1G58200, AT4G15230, AT3G05660, AT4G31110, AT4G03390, AT5G15410, AT1G72790, AT5G03520, AT5G44130, AT4G21680, AT2G17840, AT5…	303	3702	25147	1.43479	0.154048
GOTERM_BP_DIRECT	GO:0006351~transcription, DNA-templated	39	12	0.00577631	AT2G41940, AT1G22810, AT1G05420, AT4G32800, AT1G18400, AT3G01080, AT1G12540, AT2G22770, AT1G14920, AT1G62975, AT5G64750, AT3G02150, AT5G65630, AT1G10480, AT1G43160, AT2G38250, AT5G58900, AT4G16780, AT1G73830, AT1G72360, AT1G25560, AT5G62920, AT5G25810, AT2G42870, AT5G56840, AT4G17460, AT5G53290, AT1G69570, AT3G50650, AT2G28550, AT4G29930, AT5G01380, AT4G37790, AT2G32100, AT5G67190, AT4G06746, AT5…	246	1886	18499	1.55502	0.180206
GOTERM_BP_DIRECT	GO:0006811~ion transport	5	1.53846	0.00727975	AT1G16370, AT4G27970, AT1G58200, AT1G10090, AT1G62320	246	58	18499	6.48269	0.203737
GOTERM_MF_DIRECT	GO:0080043~quercetin 3-O-glucosyltransferase activity	6	1.84615	0.00806892	AT3G22250, AT3G46700, AT4G27560, AT5G59580, AT4G01070, AT1G22360	211	107	18171	4.82907	0.249945
GOTERM_MF_DIRECT	GO:0004857~enzyme inhibitor activity	5	1.53846	0.0138478	AT3G47380, AT5G62360, AT5G62350, AT4G25260, AT2G47550	211	80	18171	5.38241	0.25697
GOTERM_MF_DIRECT	GO:0016722~oxidoreductase activity, oxidizing metal ions	4	1.23077	0.0125448	AT5G01040, AT5G01050, AT1G76160, AT4G38420	211	42	18171	8.20176	0.258271
GOTERM_MF_DIRECT	GO:0033743~peptide-methionine (R)-S-oxide reductase activity	3	0.923077	0.00562746	AT4G21850, AT4G21830, AT4G04840	211	10	18171	25.8355	0.259559
GOTERM_MF_DIRECT	GO:0080044~quercetin 7-O-glucosyltransferase activity	6	1.84615	0.00746523	AT3G22250, AT3G46700, AT4G27560, AT5G59580, AT4G01070, AT1G22360	211	105	18171	4.92106	0.273278
GOTERM_MF_DIRECT	GO:0043565~sequence-specific DNA binding	16	4.92308	0.0121603	AT4G32800, AT4G17460, AT3G01080, AT3G50650, AT1G14920, AT5G01380, AT4G37790, AT1G18710, AT2G30615, AT3G53600, AT2G38250, AT4G16780, AT4G05100, AT4G23550, AT3G25730, AT1G57560	211	676	18171	2.03831	0.278017
GOTERM_MF_DIRECT	GO:0004872~receptor activity	4	1.23077	0.0109794	AT5G46790, AT5G05440, AT2G38310, AT2G40330	211	40	18171	8.61185	0.285329
GOTERM_BP_DIRECT	GO:0009414~response to water deprivation	10	3.07692	0.0123259	AT3G09940, AT5G52310, AT1G43160, AT3G30775, AT3G50970, AT5G24030, AT2G17840, AT5G38710, AT4G24960, AT5G58670	246	279	18499	2.69531	0.29848
GOTERM_BP_DIRECT	GO:0052696~flavonoid glucuronidation	6	1.84615	0.0167005	AT3G22250, AT3G46700, AT4G27560, AT5G59580, AT4G01070, AT1G22360	246	112	18499	4.02853	0.303049
GOTERM_MF_DIRECT	GO:0005215~transporter activity	10	3.07692	0.0188997	AT1G72140, AT5G56160, AT3G10960, AT1G12950, AT4G27970, AT5G54170, AT4G21680, AT5G44050, AT5G24030, AT1G22530	211	344	18171	2.50344	0.308899
GOTERM_BP_DIRECT	GO:0009641~shade avoidance	3	0.923077	0.016373	AT2G42870, AT4G16780, AT4G25260	246	15	18499	15.0398	0.314423
GOTERM_BP_DIRECT	GO:0006402~mRNA catabolic process	3	0.923077	0.0185504	AT1G77680, AT1G03457, AT5G61780	246	16	18499	14.0998	0.31463
GOTERM_BP_DIRECT	GO:0009061~anaerobic respiration	3	0.923077	0.0185504	AT3G27220, AT3G10020, AT5G15120	246	16	18499	14.0998	0.31463
GOTERM_BP_DIRECT	GO:0030091~protein repair	3	0.923077	0.0185504	AT4G21850, AT4G21830, AT4G04840	246	16	18499	14.0998	0.31463
GOTERM_BP_DIRECT	GO:0043161~proteasome-mediated ubiquitin-dependent protein catabolic process	9	2.76923	0.0210898	AT3G27220, AT1G14330, AT3G12920, AT1G15670, AT5G67480, AT5G02750, AT4G19700, AT4G22030, AT2G30600	246	256	18499	2.64372	0.319412
GOTERM_BP_DIRECT	GO:0006979~response to oxidative stress	10	3.07692	0.0158176	AT4G21850, AT3G10020, AT3G20340, AT3G30775, AT1G14550, AT5G39580, AT4G21830, AT4G37530, AT4G04840, AT2G29450	246	291	18499	2.58416	0.323369
GOTERM_BP_DIRECT	GO:0006355~regulation of transcription, DNA-templated	40	12.3077	0.0209723	AT2G41940, AT1G22810, AT4G32800, AT1G18400, AT3G01080, AT2G22770, AT1G14920, AT5G64750, AT3G02150, AT5G65630, AT1G10480, AT1G43160, AT2G38250, AT5G58900, AT4G16780, AT4G05100, AT1G73830, AT5G67480, AT1G57560, AT1G72360, AT1G25560, AT5G62920, AT5G25810, AT5G56840, AT4G17460, AT5G53290, AT1G69570, AT3G50650, AT2G28550, AT4G29930, AT5G01380, AT4G37790, AT5G67190, AT1G18710, AT3G53600, AT4G06746, AT5…	246	2119	18499	1.41952	0.332282
GOTERM_BP_DIRECT	GO:0009733~response to auxin	10	3.07692	0.0155102	AT2G46370, AT4G36110, AT4G03400, AT4G22620, AT4G16780, AT4G12410, AT5G67480, AT1G72430, AT3G59900, AT1G57560	246	290	18499	2.59308	0.337965
GOTERM_MF_DIRECT	GO:0004657~proline dehydrogenase activity	2	0.615385	0.0229808	AT3G30775, AT5G38710	211	2	18171	86.1185	0.338119
GOTERM_BP_DIRECT	GO:0006562~proline catabolic process	2	0.615385	0.0263132	AT3G30775, AT5G38710	246	2	18499	75.1992	0.353084
GOTERM_BP_DIRECT	GO:0080163~regulation of protein serine/threonine phosphatase activity	3	0.923077	0.0257569	AT5G46790, AT5G05440, AT2G38310	246	19	18499	11.8736	0.360788
GOTERM_MF_DIRECT	GO:0052739~phosphatidylserine 1-acylhydrolase activity	2	0.615385	0.0342734	AT2G44810, AT1G05800	211	3	18171	57.4123	0.371404
GOTERM_MF_DIRECT	GO:0052740~1-acyl-2-lysophosphatidylserine acylhydrolase activity	2	0.615385	0.0342734	AT2G44810, AT1G05800	211	3	18171	57.4123	0.371404
GOTERM_MF_DIRECT	GO:0044212~transcription regulatory region DNA binding	9	2.76923	0.0322079	AT2G41940, AT1G10480, AT4G32800, AT1G18710, AT2G30615, AT3G53600, AT4G05100, AT3G25730, AT1G57560	211	319	18171	2.42968	0.371789
GOTERM_MF_DIRECT	GO:0003712~transcription cofactor activity	3	0.923077	0.0310498	AT2G42870, AT5G61780, AT5G67480	211	24	18171	10.7648	0.381149
GOTERM_MF_DIRECT	GO:0016758~transferase activity, transferring hexosyl groups	6	1.84615	0.0419442	AT3G22250, AT3G46700, AT4G27560, AT5G59580, AT4G01070, AT1G22360	211	164	18171	3.15068	0.381441
GOTERM_MF_DIRECT	GO:0008194~UDP-glycosyltransferase activity	5	1.53846	0.0297046	AT3G22250, AT3G46700, AT5G59580, AT4G01070, AT1G22360	211	101	18171	4.26329	0.389864
GOTERM_MF_DIRECT	GO:0046423~allene-oxide cyclase activity	2	0.615385	0.045436	AT3G25770, AT3G25760	211	4	18171	43.0592	0.39057
GOTERM_MF_DIRECT	GO:0046910~pectinesterase inhibitor activity	5	1.53846	0.0410356	AT3G47380, AT5G62360, AT5G62350, AT4G25260, AT2G47550	211	112	18171	3.84458	0.390936
GOTERM_MF_DIRECT	GO:0031625~ubiquitin protein ligase binding	5	1.53846	0.0399173	AT3G27220, AT1G14330, AT1G15670, AT5G67480, AT2G30600	211	111	18171	3.87921	0.399743
GOTERM_MF_DIRECT	GO:0003824~catalytic activity	9	2.76923	0.0504152	AT2G46370, AT2G34770, AT5G65280, AT4G32790, AT4G37770, AT4G08170, AT2G39420, AT3G03990, AT4G24350	211	349	18171	2.22082	0.408264
GOTERM_MF_DIRECT	GO:0042803~protein homodimerization activity	6	1.84615	0.0570598	AT2G19570, AT2G42870, AT4G16780, AT5G46790, AT2G38310, AT2G40330	211	179	18171	2.88665	0.419635
GOTERM_CC_DIRECT	GO:0005634~nucleus	135	41.5385	0.0305322	AT2G19570, AT3G20340, AT2G22770, AT5G25350, AT1G59710, AT3G59900, AT3G25870, AT1G57650, AT1G43160, AT4G08170, AT5G25280, AT5G58900, AT4G16780, AT5G05440, AT4G05100, AT4G19530, AT2G38310, AT5G62920, AT3G49940, AT5G56840, AT5G53290, AT5G20150, AT1G51090, AT4G06598, AT5G55090, AT4G15233, AT2G47950, AT1G72470, AT5G63370, AT5G49700, AT4G15230, AT4G32350, AT3G10020, AT5G40590, AT1G12540, AT2G32510, AT4…	303	9796	25147	1.14374	0.423277
GOTERM_MF_DIRECT	GO:0016762~xyloglucan:xyloglucosyl transferase activity	3	0.923077	0.0555359	AT4G25810, AT3G23730, AT1G10550	211	33	18171	7.82895	0.424891
GOTERM_CC_DIRECT	GO:0043231~intracellular membrane-bounded organelle	7	2.15385	0.025213	AT2G27690, AT3G22250, AT3G46700, AT4G27560, AT5G59580, AT4G01070, AT1G22360	303	186	25147	3.12341	0.453575
GOTERM_BP_DIRECT	GO:0071456~cellular response to hypoxia	3	0.923077	0.0460914	AT1G14550, AT4G37710, AT1G72360	246	26	18499	8.67683	0.463405
GOTERM_BP_DIRECT	GO:0010133~proline catabolic process to glutamate	2	0.615385	0.0392101	AT3G30775, AT5G38710	246	3	18499	50.1328	0.464004
GOTERM_BP_DIRECT	GO:0009585~red, far-red light phototransduction	4	1.23077	0.0490453	AT2G46370, AT1G14280, AT2G02950, AT4G16780	246	62	18499	4.85156	0.472103
GOTERM_BP_DIRECT	GO:0009738~abscisic acid-activated signaling pathway	7	2.15385	0.0456895	AT2G40180, AT5G46790, AT5G05440, AT5G58670, AT2G38310, AT5G64750, AT2G40330	246	195	18499	2.69946	0.473568
GOTERM_BP_DIRECT	GO:0042546~cell wall biogenesis	4	1.23077	0.0452265	AT4G25810, AT2G33570, AT3G23730, AT1G10550	246	60	18499	5.01328	0.48389
GOTERM_BP_DIRECT	GO:0009813~flavonoid biosynthetic process	6	1.84615	0.0439317	AT3G22250, AT3G46700, AT4G27560, AT5G59580, AT4G01070, AT1G22360	246	145	18499	3.11169	0.488282
GOTERM_MF_DIRECT	GO:0020037~heme binding	9	2.76923	0.0800356	AT2G27690, AT5G52400, AT3G25180, AT5G63450, AT1G14550, AT5G39580, AT4G37530, AT4G37410, AT5G59920	211	386	18171	2.00794	0.523055
GOTERM_BP_DIRECT	GO:0006357~regulation of transcription from RNA polymerase II promoter	7	2.15385	0.0645759	AT5G56840, AT1G18710, AT2G30615, AT1G12540, AT4G05100, AT1G62975, AT1G57560	246	213	18499	2.47133	0.533844
GOTERM_MF_DIRECT	GO:0004806~triglyceride lipase activity	3	0.923077	0.0882021	AT5G42930, AT2G44810, AT1G05800	211	43	18171	6.00827	0.54466
GOTERM_BP_DIRECT	GO:0034059~response to anoxia	2	0.615385	0.0644956	AT1G72360, AT4G33070	246	5	18499	30.0797	0.545492
GOTERM_BP_DIRECT	GO:0006537~glutamate biosynthetic process	2	0.615385	0.0644956	AT3G30775, AT5G38710	246	5	18499	30.0797	0.545492
GOTERM_BP_DIRECT	GO:0055085~transmembrane transport	7	2.15385	0.0633993	AT1G16370, AT3G45060, AT4G27970, AT5G17860, AT1G58200, AT5G24030, AT5G61810	246	212	18499	2.48299	0.551727
GOTERM_CC_DIRECT	GO:0009505~plant-type cell wall	10	3.07692	0.0226963	AT1G76160, AT1G62440, AT4G15800, AT5G44130, AT4G16563, AT5G39580, AT4G38400, AT4G38420, AT2G47550, AT4G24350	303	341	25147	2.43382	0.557362
GOTERM_MF_DIRECT	GO:0047714~galactolipase activity	2	0.615385	0.099352	AT2G44810, AT1G05800	211	9	18171	19.1374	0.561984
GOTERM_MF_DIRECT	GO:0004629~phospholipase C activity	2	0.615385	0.099352	AT3G55940, AT5G58670	211	9	18171	19.1374	0.561984
GOTERM_MF_DIRECT	GO:0004435~phosphatidylinositol phospholipase C activity	2	0.615385	0.099352	AT3G55940, AT5G58670	211	9	18171	19.1374	0.561984
GOTERM_MF_DIRECT	GO:0016798~hydrolase activity, acting on glycosyl bonds	3	0.923077	0.0988896	AT4G25810, AT3G23730, AT1G10550	211	46	18171	5.61642	0.573884
GOTERM_BP_DIRECT	GO:0080037~negative regulation of cytokinin-activated signaling pathway	2	0.615385	0.0768888	AT3G59940, AT1G15670	246	6	18499	25.0664	0.587378
GOTERM_BP_DIRECT	GO:0009694~jasmonic acid metabolic process	2	0.615385	0.0768888	AT2G46370, AT1G44350	246	6	18499	25.0664	0.587378
GOTERM_BP_DIRECT	GO:0000304~response to singlet oxygen	2	0.615385	0.0891184	AT1G61120, AT4G21830	246	7	18499	21.4855	0.620991
GOTERM_BP_DIRECT	GO:2000762~regulation of phenylpropanoid metabolic process	2	0.615385	0.0891184	AT3G59940, AT1G15670	246	7	18499	21.4855	0.620991
GOTERM_BP_DIRECT	GO:0006873~cellular ion homeostasis	2	0.615385	0.0891184	AT4G27970, AT5G24030	246	7	18499	21.4855	0.620991
GOTERM_BP_DIRECT	GO:0042787~protein ubiquitination involved in ubiquitin-dependent protein catabolic process	6	1.84615	0.0866932	AT3G27220, AT1G14330, AT1G15670, AT5G67480, AT5G02750, AT2G30600	246	177	18499	2.54912	0.621679
KEGG_PATHWAY	ath04075:Plant hormone signal transduction	12	3.69231	7.36494e-05	AT2G46370, AT4G36110, AT5G62920, AT4G03400, AT4G22620, AT5G46790, AT4G12410, AT5G05440, AT5G25350, AT1G14920, AT2G38310, AT2G40330	51	265	4727	4.19711	0.00286831
KEGG_PATHWAY	ath00562:Inositol phosphate metabolism	4	1.23077	0.0345065	AT3G55940, AT2G19800, AT4G08170, AT5G58670	51	68	4727	5.45213	0.495788
KEGG_PATHWAY	ath00592:alpha-Linolenic acid metabolism	3	0.923077	0.0549881	AT2G44810, AT3G25770, AT3G25760	51	36	4727	7.72386	0.520615
