# Supplementary material for: Molecular Targets and Biological Functions of cAMP Signaling in Arabidopsis
Source: Biomolecules. 2021 May 3;11(5):688. doi: 10.3390/biom11050688 (PMC8147800; doi:10.3390/biom11050688)
Supplement: Supplementary file 1 [file biomolecules-11-00688-s001.zip › Supplementary Data S4.xlsx]

## Sheet: KEGG_ALL
Supplementary Data S4. Biological pathways of CRGs (based on KEGG database)
TermID	Description	Category	GeneRatio	BgRatio	Enrich_factor	P_value	P_adjust	GeneCount	GeneIDs	GeneNames	KeggIDs
ko04075	Plant hormone signal transduction	Environmental Information Processing	7/53	44/2292	6.87993	4.67983e-05	0.00425865	7	AT1G14920,AT1G56150,AT2G38310,AT2G40330,AT2G46370,AT3G09870,AT4G03400,AT4G12410,AT4G22620,AT4G27260,AT4G36110,AT5G05440,AT5G25350,AT5G46790,AT5G62920	AT1G14920,AT1G56150,AT2G38310,AT2G40330,AT2G46370,AT3G09870,AT4G03400,AT4G12410,AT4G22620,AT4G27260,AT4G36110,AT5G05440,AT5G25350,AT5G46790,AT5G62920	K14487,K14488,K14492,K14494,K14496,K14506,K14515
ko00904	Diterpenoid biosynthesis	Metabolism	3/53	9/2292	14.4151	0.000889394	0.0383127	3	AT1G61120,AT3G25180,AT4G02780	AT1G61120,AT3G25180,AT4G02780	K04120,K17961,K17982
ko04016	MAPK signaling pathway - plant	Environmental Information Processing	6/53	54/2292	4.80503	0.00126306	0.0383127	6	AT2G32510,AT2G38310,AT2G38470,AT2G40330,AT4G23550,AT5G05440,AT5G25350,AT5G46790,AT5G53210	AT2G32510,AT2G38310,AT2G38470,AT2G40330,AT4G23550,AT5G05440,AT5G25350,AT5G46790,AT5G53210	K13424,K13426,K14496,K14515,K20558,K20716
ko04626	Plant-pathogen interaction	Organismal Systems	4/53	37/2292	4.67517	0.00956934	0.210428	4	AT2G38470,AT3G59350,AT4G23550,AT5G15410	AT2G38470,AT3G59350,AT4G23550,AT5G15410	K05391,K13424,K13426,K13436
ko00400	Phenylalanine, tyrosine and tryptophan biosynthesis	Metabolism	3/53	23/2292	5.64069	0.0149146	0.210428	3	AT2G24850,AT4G39980,AT5G28237	AT2G24850,AT4G39980,AT5G28237	K00815,K01626,K01696
ko00562	Inositol phosphate metabolism	Metabolism	3/53	23/2292	5.64069	0.0149146	0.210428	3	AT2G19800,AT3G55940,AT4G08170,AT5G58670	AT2G19800,AT3G55940,AT4G08170,AT5G58670	K00469,K00913,K05857
ko00363	Bisphenol degradation	Metabolism	1/53	1/2292	43.2453	0.0231239	0.210428	1	AT4G37410	AT4G37410	K00517
ko00524	Neomycin, kanamycin and gentamicin biosynthesis	Metabolism	1/53	1/2292	43.2453	0.0231239	0.210428	1	AT1G50460	AT1G50460	K00844
ko00624	Polycyclic aromatic hydrocarbon degradation	Metabolism	1/53	1/2292	43.2453	0.0231239	0.210428	1	AT4G37410	AT4G37410	K00517
ko05033	Nicotine addiction	Human Diseases	1/53	1/2292	43.2453	0.0231239	0.210428	1	AT2G39130	AT2G39130	K15015
ko00910	Nitrogen metabolism	Metabolism	2/53	13/2292	6.65312	0.0347731	0.244393	2	AT1G23730,AT3G45060	AT1G23730,AT3G45060	K01673,K02575
ko00053	Ascorbate and aldarate metabolism	Metabolism	2/53	15/2292	5.76604	0.0454556	0.244393	2	AT2G19800,AT3G09940	AT2G19800,AT3G09940	K00469,K08232
ko00401	Novobiocin biosynthesis	Metabolism	1/53	2/2292	21.6226	0.045723	0.244393	1	AT2G24850	AT2G24850	K00815
ko00903	Limonene and pinene degradation	Metabolism	1/53	2/2292	21.6226	0.045723	0.244393	1	AT4G37410	AT4G37410	K00517
ko05032	Morphine addiction	Human Diseases	1/53	2/2292	21.6226	0.045723	0.244393	1	AT2G39130	AT2G39130	K15015
ko01110	Biosynthesis of secondary metabolites	Metabolism	15/53	419/2292	1.54816	0.047093	0.244393	15	AT1G14550,AT1G50460,AT1G76090,AT2G24850,AT2G44810,AT3G14440,AT3G17390,AT3G25760,AT3G25770,AT3G30775,AT4G02780,AT4G19170,AT4G33070,AT4G37410,AT4G37530,AT4G37770,AT4G39980,AT5G28237,AT5G38710,AT5G39580	AT1G14550,AT1G50460,AT1G76090,AT2G24850,AT2G44810,AT3G14440,AT3G17390,AT3G25760,AT3G25770,AT3G30775,AT4G02780,AT4G19170,AT4G33070,AT4G37410,AT4G37530,AT4G37770,AT4G39980,AT5G28237,AT5G38710,AT5G39580	K00318,K00430,K00517,K00789,K00815,K00844,K01568,K01626,K01696,K01762,K04120,K08242,K09840,K10525,K16818
ko00052	Galactose metabolism	Metabolism	2/53	16/2292	5.40566	0.051194	0.244393	2	AT1G50460,AT1G56600	AT1G50460,AT1G56600	K00844,K18819
ko00592	alpha-Linolenic acid metabolism	Metabolism	2/53	16/2292	5.40566	0.051194	0.244393	2	AT2G44810,AT3G25760,AT3G25770	AT2G44810,AT3G25760,AT3G25770	K10525,K16818
ko00270	Cysteine and methionine metabolism	Metabolism	3/53	37/2292	3.50637	0.0521956	0.244393	3	AT2G24850,AT3G17390,AT4G37770	AT2G24850,AT3G17390,AT4G37770	K00789,K00815,K01762
ko04910	Insulin signaling pathway	Organismal Systems	2/53	18/2292	4.80503	0.0633933	0.244393	2	AT1G50460,AT1G72470	AT1G50460,AT1G72470	K00844,K07195
ko00430	Taurine and hypotaurine metabolism	Metabolism	1/53	3/2292	14.4151	0.0678089	0.244393	1	AT5G15120	AT5G15120	K10712
ko04933	AGE-RAGE signaling pathway in diabetic complications	Human Diseases	1/53	3/2292	14.4151	0.0678089	0.244393	1	AT3G55940,AT5G58670	AT3G55940,AT5G58670	K05857
ko04964	Proximal tubule bicarbonate reclamation	Organismal Systems	1/53	3/2292	14.4151	0.0678089	0.244393	1	AT4G24570	AT4G24570	K13577
ko04973	Carbohydrate digestion and absorption	Organismal Systems	1/53	3/2292	14.4151	0.0678089	0.244393	1	AT1G50460	AT1G50460	K00844
ko05204	Chemical carcinogenesis	Human Diseases	1/53	3/2292	14.4151	0.0678089	0.244393	1	AT2G29440,AT2G29450	AT2G29440,AT2G29450	K00799
ko04070	Phosphatidylinositol signaling system	Environmental Information Processing	2/53	19/2292	4.55214	0.0698266	0.244393	2	AT3G55940,AT4G08170,AT5G58670	AT3G55940,AT4G08170,AT5G58670	K00913,K05857
ko00521	Streptomycin biosynthesis	Metabolism	1/53	4/2292	10.8113	0.089393	0.262412	1	AT1G50460	AT1G50460	K00844
ko00980	Metabolism of xenobiotics by cytochrome P450	Metabolism	1/53	4/2292	10.8113	0.089393	0.262412	1	AT2G29440,AT2G29450	AT2G29440,AT2G29450	K00799
ko00982	Drug metabolism - cytochrome P450	Metabolism	1/53	4/2292	10.8113	0.089393	0.262412	1	AT2G29440,AT2G29450	AT2G29440,AT2G29450	K00799
ko04930	Type II diabetes mellitus	Human Diseases	1/53	4/2292	10.8113	0.089393	0.262412	1	AT1G50460	AT1G50460	K00844
ko04972	Pancreatic secretion	Organismal Systems	1/53	4/2292	10.8113	0.089393	0.262412	1	AT5G03520	AT5G03520	K07901
ko04152	AMPK signaling pathway	Environmental Information Processing	2/53	23/2292	3.76046	0.0974876	0.27723	2	AT1G56070,AT5G03520	AT1G56070,AT5G03520	K03234,K07901
ko00627	Aminobenzoate degradation	Metabolism	1/53	5/2292	8.64906	0.110487	0.295714	1	AT4G37410	AT4G37410	K00517
ko00945	Stilbenoid, diarylheptanoid and gingerol biosynthesis	Metabolism	1/53	5/2292	8.64906	0.110487	0.295714	1	AT4G37410	AT4G37410	K00517
ko04144	Endocytosis	Cellular Processes	3/53	54/2292	2.40252	0.127161	0.33062	3	AT2G17840,AT3G09440,AT5G03520	AT2G17840,AT3G09440,AT5G03520	K03283,K07901,K19366
ko05145	Toxoplasmosis	Human Diseases	1/53	6/2292	7.20755	0.131101	0.331393	1	AT3G09440	AT3G09440	K03283
ko04020	Calcium signaling pathway	Environmental Information Processing	1/53	7/2292	6.1779	0.151246	0.362194	1	AT3G55940,AT5G58670	AT3G55940,AT5G58670	K05857
ko04915	Estrogen signaling pathway	Organismal Systems	1/53	7/2292	6.1779	0.151246	0.362194	1	AT3G09440	AT3G09440	K03283
ko00010	Glycolysis / Gluconeogenesis	Metabolism	2/53	32/2292	2.70283	0.16799	0.370353	2	AT1G50460,AT4G33070	AT1G50460,AT4G33070	K00844,K01568
ko00950	Isoquinoline alkaloid biosynthesis	Metabolism	1/53	8/2292	5.40566	0.170932	0.370353	1	AT2G24850	AT2G24850	K00815
ko00960	Tropane, piperidine and pyridine alkaloid biosynthesis	Metabolism	1/53	8/2292	5.40566	0.170932	0.370353	1	AT2G24850	AT2G24850	K00815
ko04727	GABAergic synapse	Organismal Systems	1/53	8/2292	5.40566	0.170932	0.370353	1	AT2G39130	AT2G39130	K15015
ko04010	MAPK signaling pathway	Environmental Information Processing	1/53	9/2292	4.80503	0.190171	0.382587	1	AT3G09440	AT3G09440	K03283
ko04612	Antigen processing and presentation	Organismal Systems	1/53	9/2292	4.80503	0.190171	0.382587	1	AT3G09440	AT3G09440	K03283
ko04921	Oxytocin signaling pathway	Organismal Systems	1/53	9/2292	4.80503	0.190171	0.382587	1	AT1G56070	AT1G56070	K03234
ko01230	Biosynthesis of amino acids	Metabolism	4/53	99/2292	1.74728	0.193396	0.382587	4	AT2G24850,AT3G17390,AT4G39980,AT5G28237	AT2G24850,AT3G17390,AT4G39980,AT5G28237	K00789,K00815,K01626,K01696
ko05134	Legionellosis	Human Diseases	1/53	11/2292	3.93139	0.227343	0.413369	1	AT3G09440	AT3G09440	K03283
ko05162	Measles	Human Diseases	1/53	11/2292	3.93139	0.227343	0.413369	1	AT3G09440	AT3G09440	K03283
ko05418	Fluid shear stress and atherosclerosis	Human Diseases	1/53	11/2292	3.93139	0.227343	0.413369	1	AT2G29440,AT2G29450	AT2G29440,AT2G29450	K00799
ko00040	Pentose and glucuronate interconversions	Metabolism	1/53	12/2292	3.60377	0.245296	0.413369	1	AT2G47550	AT2G47550	K01051
ko00983	Drug metabolism - other enzymes	Metabolism	1/53	12/2292	3.60377	0.245296	0.413369	1	AT2G19570	AT2G19570	K01489
ko04213	Longevity regulating pathway - multiple species	Organismal Systems	1/53	12/2292	3.60377	0.245296	0.413369	1	AT3G09440	AT3G09440	K03283
ko04260	Cardiac muscle contraction	Organismal Systems	1/53	12/2292	3.60377	0.245296	0.413369	1	AT5G25450	AT5G25450	K00417
ko05230	Central carbon metabolism in cancer	Human Diseases	1/53	12/2292	3.60377	0.245296	0.413369	1	AT1G50460	AT1G50460	K00844
ko02024	Quorum sensing	Cellular Processes	1/53	13/2292	3.32656	0.262839	0.43488	1	AT4G39980	AT4G39980	K01626
ko00360	Phenylalanine metabolism	Metabolism	1/53	14/2292	3.08895	0.279983	0.445195	1	AT2G24850	AT2G24850	K00815
ko04530	Tight junction	Cellular Processes	1/53	14/2292	3.08895	0.279983	0.445195	1	AT5G03520	AT5G03520	K07901
ko01130	Biosynthesis of antibiotics	Metabolism	6/53	194/2292	1.33748	0.289348	0.445195	6	AT1G50460,AT2G24850,AT3G30775,AT4G33070,AT4G39980,AT5G28237,AT5G38710	AT1G50460,AT2G24850,AT3G30775,AT4G33070,AT4G39980,AT5G28237,AT5G38710	K00318,K00815,K00844,K01568,K01626,K01696
ko01524	Platinum drug resistance	Human Diseases	1/53	15/2292	2.88302	0.296735	0.445195	1	AT2G29440,AT2G29450	AT2G29440,AT2G29450	K00799
ko04066	HIF-1 signaling pathway	Environmental Information Processing	1/53	15/2292	2.88302	0.296735	0.445195	1	AT1G50460	AT1G50460	K00844
ko00350	Tyrosine metabolism	Metabolism	1/53	16/2292	2.70283	0.313104	0.445195	1	AT2G24850	AT2G24850	K00815
ko00480	Glutathione metabolism	Metabolism	1/53	16/2292	2.70283	0.313104	0.445195	1	AT2G29440,AT2G29450	AT2G29440,AT2G29450	K00799
ko04919	Thyroid hormone signaling pathway	Organismal Systems	1/53	16/2292	2.70283	0.313104	0.445195	1	AT3G55940,AT5G58670	AT3G55940,AT5G58670	K05857
ko05164	Influenza A	Human Diseases	1/53	16/2292	2.70283	0.313104	0.445195	1	AT3G09440	AT3G09440	K03283
ko00100	Steroid biosynthesis	Metabolism	1/53	18/2292	2.40252	0.344729	0.482621	1	AT1G76090	AT1G76090	K08242
ko00051	Fructose and mannose metabolism	Metabolism	1/53	19/2292	2.27607	0.360002	0.496366	1	AT1G50460	AT1G50460	K00844
ko00130	Ubiquinone and other terpenoid-quinone biosynthesis	Metabolism	1/53	20/2292	2.16226	0.374925	0.501737	1	AT2G24850	AT2G24850	K00815
ko00906	Carotenoid biosynthesis	Metabolism	1/53	20/2292	2.16226	0.374925	0.501737	1	AT3G14440,AT4G19170	AT3G14440,AT4G19170	K09840
ko01100	Metabolic pathways	Metabolism	21/53	861/2292	1.05476	0.428479	0.545086	21	AT1G14550,AT1G50460,AT2G19570,AT2G24850,AT2G44810,AT2G47550,AT3G09940,AT3G14440,AT3G17390,AT3G25760,AT3G25770,AT3G30775,AT3G55940,AT4G02780,AT4G08170,AT4G19170,AT4G33070,AT4G37410,AT4G37530,AT4G37770,AT4G39980,AT5G15120,AT5G25450,AT5G28237,AT5G38710,AT5G39580,AT5G58670	AT1G14550,AT1G50460,AT2G19570,AT2G24850,AT2G44810,AT2G47550,AT3G09940,AT3G14440,AT3G17390,AT3G25760,AT3G25770,AT3G30775,AT3G55940,AT4G02780,AT4G08170,AT4G19170,AT4G33070,AT4G37410,AT4G37530,AT4G37770,AT4G39980,AT5G15120,AT5G25450,AT5G28237,AT5G38710,AT5G39580,AT5G58670	K00318,K00417,K00430,K00517,K00789,K00815,K00844,K00913,K01051,K01489,K01568,K01626,K01696,K01762,K04120,K05857,K08232,K09840,K10525,K10712,K16818
ko00330	Arginine and proline metabolism	Metabolism	1/53	24/2292	1.80189	0.431277	0.545086	1	AT3G30775,AT5G38710	AT3G30775,AT5G38710	K00318
ko00940	Phenylpropanoid biosynthesis	Metabolism	1/53	24/2292	1.80189	0.431277	0.545086	1	AT1G14550,AT4G37530,AT5G39580	AT1G14550,AT4G37530,AT5G39580	K00430
ko04721	Synaptic vesicle cycle	Organismal Systems	1/53	24/2292	1.80189	0.431277	0.545086	1	AT2G39130	AT2G39130	K15015
ko05169	Epstein-Barr virus infection	Human Diseases	2/53	64/2292	1.35142	0.43953	0.547908	2	AT3G09440,AT5G61780	AT3G09440,AT5G61780	K03283,K15979
ko00500	Starch and sucrose metabolism	Metabolism	1/53	30/2292	1.44151	0.506581	0.622957	1	AT1G50460	AT1G50460	K00844
ko04141	Protein processing in endoplasmic reticulum	Genetic Information Processing	2/53	77/2292	1.12325	0.538024	0.63874	2	AT3G09440,AT4G21870	AT3G09440,AT4G21870	K03283,K13993
ko00260	Glycine, serine and threonine metabolism	Metabolism	1/53	33/2292	1.31046	0.540472	0.63874	1	AT5G28237	AT5G28237	K01696
ko04723	Retrograde endocannabinoid signaling	Organismal Systems	1/53	33/2292	1.31046	0.540472	0.63874	1	AT2G39130	AT2G39130	K15015
ko00564	Glycerophospholipid metabolism	Metabolism	1/53	35/2292	1.23558	0.561787	0.655418	1	AT2G44810	AT2G44810	K16818
ko04146	Peroxisome	Cellular Processes	1/53	36/2292	1.20126	0.572077	0.658975	1	AT4G33905	AT4G33905	K13348
ko05203	Viral carcinogenesis	Human Diseases	1/53	39/2292	1.10885	0.601546	0.684259	1	AT5G61780	AT5G61780	K15979
ko00520	Amino sugar and nucleotide sugar metabolism	Metabolism	1/53	40/2292	1.08113	0.610919	0.686342	1	AT1G50460	AT1G50460	K00844
ko04932	Non-alcoholic fatty liver disease (NAFLD)	Human Diseases	1/53	45/2292	0.961006	0.654636	0.726486	1	AT5G25450	AT5G25450	K00417
ko03018	RNA degradation	Genetic Information Processing	1/53	49/2292	0.882557	0.686106	0.752236	1	AT1G61470	AT1G61470	K12581
ko05010	Alzheimer's disease	Human Diseases	1/53	58/2292	0.745608	0.746984	0.809233	1	AT5G25450	AT5G25450	K00417
ko05012	Parkinson's disease	Human Diseases	1/53	60/2292	0.720755	0.75885	0.812415	1	AT5G25450	AT5G25450	K00417
ko05016	Huntington's disease	Human Diseases	1/53	72/2292	0.600629	0.819394	0.861578	1	AT5G25450	AT5G25450	K00417
ko00240	Pyrimidine metabolism	Metabolism	1/53	73/2292	0.592401	0.823706	0.861578	1	AT2G19570	AT2G19570	K01489
ko01120	Microbial metabolism in diverse environments	Metabolism	2/53	145/2292	0.596487	0.859731	0.88904	2	AT1G50460,AT4G37410	AT1G50460,AT4G37410	K00517,K00844
ko00190	Oxidative phosphorylation	Metabolism	1/53	92/2292	0.470057	0.888843	0.901427	1	AT5G25450	AT5G25450	K00417
ko01200	Carbon metabolism	Metabolism	1/53	93/2292	0.465003	0.891521	0.901427	1	AT1G50460	AT1G50460	K00844
ko03040	Spliceosome	Genetic Information Processing	1/53	101/2292	0.428171	0.910784	0.910784	1	AT3G09440	AT3G09440	K03283

## Sheet: KEGG_EIP
TermID	Description	Category	GeneRatio	BgRatio	Enrich_factor	P_value	P_adjust	GeneCount	GeneIDs	GeneNames	KeggIDs
ko04075	Plant hormone signal transduction	Environmental Information Processing	7/53	44/2292	6.87993	4.67983e-05	0.00425865	7	AT1G14920,AT1G56150,AT2G38310,AT2G40330,AT2G46370,AT3G09870,AT4G03400,AT4G12410,AT4G22620,AT4G27260,AT4G36110,AT5G05440,AT5G25350,AT5G46790,AT5G62920	AT1G14920,AT1G56150,AT2G38310,AT2G40330,AT2G46370,AT3G09870,AT4G03400,AT4G12410,AT4G22620,AT4G27260,AT4G36110,AT5G05440,AT5G25350,AT5G46790,AT5G62920	K14487,K14488,K14492,K14494,K14496,K14506,K14515
ko04016	MAPK signaling pathway - plant	Environmental Information Processing	6/53	54/2292	4.80503	0.00126306	0.0383127	6	AT2G32510,AT2G38310,AT2G38470,AT2G40330,AT4G23550,AT5G05440,AT5G25350,AT5G46790,AT5G53210	AT2G32510,AT2G38310,AT2G38470,AT2G40330,AT4G23550,AT5G05440,AT5G25350,AT5G46790,AT5G53210	K13424,K13426,K14496,K14515,K20558,K20716
ko04070	Phosphatidylinositol signaling system	Environmental Information Processing	2/53	19/2292	4.55214	0.0698266	0.244393	2	AT3G55940,AT4G08170,AT5G58670	AT3G55940,AT4G08170,AT5G58670	K00913,K05857
ko04152	AMPK signaling pathway	Environmental Information Processing	2/53	23/2292	3.76046	0.0974876	0.27723	2	AT1G56070,AT5G03520	AT1G56070,AT5G03520	K03234,K07901
ko04020	Calcium signaling pathway	Environmental Information Processing	1/53	7/2292	6.1779	0.151246	0.362194	1	AT3G55940,AT5G58670	AT3G55940,AT5G58670	K05857
ko04010	MAPK signaling pathway	Environmental Information Processing	1/53	9/2292	4.80503	0.190171	0.382587	1	AT3G09440	AT3G09440	K03283
ko04066	HIF-1 signaling pathway	Environmental Information Processing	1/53	15/2292	2.88302	0.296735	0.445195	1	AT1G50460	AT1G50460	K00844

## Sheet: KEGG_M
TermID	Description	Category	GeneRatio	BgRatio	Enrich_factor	P_value	P_adjust	GeneCount	GeneIDs	GeneNames	KeggIDs
ko00904	Diterpenoid biosynthesis	Metabolism	3/53	9/2292	14.4151	0.000889394	0.0383127	3	AT1G61120,AT3G25180,AT4G02780	AT1G61120,AT3G25180,AT4G02780	K04120,K17961,K17982
ko00400	Phenylalanine, tyrosine and tryptophan biosynthesis	Metabolism	3/53	23/2292	5.64069	0.0149146	0.210428	3	AT2G24850,AT4G39980,AT5G28237	AT2G24850,AT4G39980,AT5G28237	K00815,K01626,K01696
ko00562	Inositol phosphate metabolism	Metabolism	3/53	23/2292	5.64069	0.0149146	0.210428	3	AT2G19800,AT3G55940,AT4G08170,AT5G58670	AT2G19800,AT3G55940,AT4G08170,AT5G58670	K00469,K00913,K05857
ko00363	Bisphenol degradation	Metabolism	1/53	1/2292	43.2453	0.0231239	0.210428	1	AT4G37410	AT4G37410	K00517
ko00524	Neomycin, kanamycin and gentamicin biosynthesis	Metabolism	1/53	1/2292	43.2453	0.0231239	0.210428	1	AT1G50460	AT1G50460	K00844
ko00624	Polycyclic aromatic hydrocarbon degradation	Metabolism	1/53	1/2292	43.2453	0.0231239	0.210428	1	AT4G37410	AT4G37410	K00517
ko00910	Nitrogen metabolism	Metabolism	2/53	13/2292	6.65312	0.0347731	0.244393	2	AT1G23730,AT3G45060	AT1G23730,AT3G45060	K01673,K02575
ko00053	Ascorbate and aldarate metabolism	Metabolism	2/53	15/2292	5.76604	0.0454556	0.244393	2	AT2G19800,AT3G09940	AT2G19800,AT3G09940	K00469,K08232
ko00401	Novobiocin biosynthesis	Metabolism	1/53	2/2292	21.6226	0.045723	0.244393	1	AT2G24850	AT2G24850	K00815
ko00903	Limonene and pinene degradation	Metabolism	1/53	2/2292	21.6226	0.045723	0.244393	1	AT4G37410	AT4G37410	K00517
ko01110	Biosynthesis of secondary metabolites	Metabolism	15/53	419/2292	1.54816	0.047093	0.244393	15	AT1G14550,AT1G50460,AT1G76090,AT2G24850,AT2G44810,AT3G14440,AT3G17390,AT3G25760,AT3G25770,AT3G30775,AT4G02780,AT4G19170,AT4G33070,AT4G37410,AT4G37530,AT4G37770,AT4G39980,AT5G28237,AT5G38710,AT5G39580	AT1G14550,AT1G50460,AT1G76090,AT2G24850,AT2G44810,AT3G14440,AT3G17390,AT3G25760,AT3G25770,AT3G30775,AT4G02780,AT4G19170,AT4G33070,AT4G37410,AT4G37530,AT4G37770,AT4G39980,AT5G28237,AT5G38710,AT5G39580	K00318,K00430,K00517,K00789,K00815,K00844,K01568,K01626,K01696,K01762,K04120,K08242,K09840,K10525,K16818
ko00052	Galactose metabolism	Metabolism	2/53	16/2292	5.40566	0.051194	0.244393	2	AT1G50460,AT1G56600	AT1G50460,AT1G56600	K00844,K18819
ko00592	alpha-Linolenic acid metabolism	Metabolism	2/53	16/2292	5.40566	0.051194	0.244393	2	AT2G44810,AT3G25760,AT3G25770	AT2G44810,AT3G25760,AT3G25770	K10525,K16818
ko00270	Cysteine and methionine metabolism	Metabolism	3/53	37/2292	3.50637	0.0521956	0.244393	3	AT2G24850,AT3G17390,AT4G37770	AT2G24850,AT3G17390,AT4G37770	K00789,K00815,K01762
ko00430	Taurine and hypotaurine metabolism	Metabolism	1/53	3/2292	14.4151	0.0678089	0.244393	1	AT5G15120	AT5G15120	K10712
ko00521	Streptomycin biosynthesis	Metabolism	1/53	4/2292	10.8113	0.089393	0.262412	1	AT1G50460	AT1G50460	K00844
ko00980	Metabolism of xenobiotics by cytochrome P450	Metabolism	1/53	4/2292	10.8113	0.089393	0.262412	1	AT2G29440,AT2G29450	AT2G29440,AT2G29450	K00799
ko00982	Drug metabolism - cytochrome P450	Metabolism	1/53	4/2292	10.8113	0.089393	0.262412	1	AT2G29440,AT2G29450	AT2G29440,AT2G29450	K00799
ko00627	Aminobenzoate degradation	Metabolism	1/53	5/2292	8.64906	0.110487	0.295714	1	AT4G37410	AT4G37410	K00517
ko00945	Stilbenoid, diarylheptanoid and gingerol biosynthesis	Metabolism	1/53	5/2292	8.64906	0.110487	0.295714	1	AT4G37410	AT4G37410	K00517
ko00010	Glycolysis / Gluconeogenesis	Metabolism	2/53	32/2292	2.70283	0.16799	0.370353	2	AT1G50460,AT4G33070	AT1G50460,AT4G33070	K00844,K01568
ko00950	Isoquinoline alkaloid biosynthesis	Metabolism	1/53	8/2292	5.40566	0.170932	0.370353	1	AT2G24850	AT2G24850	K00815
ko00960	Tropane, piperidine and pyridine alkaloid biosynthesis	Metabolism	1/53	8/2292	5.40566	0.170932	0.370353	1	AT2G24850	AT2G24850	K00815
ko01230	Biosynthesis of amino acids	Metabolism	4/53	99/2292	1.74728	0.193396	0.382587	4	AT2G24850,AT3G17390,AT4G39980,AT5G28237	AT2G24850,AT3G17390,AT4G39980,AT5G28237	K00789,K00815,K01626,K01696
ko00040	Pentose and glucuronate interconversions	Metabolism	1/53	12/2292	3.60377	0.245296	0.413369	1	AT2G47550	AT2G47550	K01051
ko00983	Drug metabolism - other enzymes	Metabolism	1/53	12/2292	3.60377	0.245296	0.413369	1	AT2G19570	AT2G19570	K01489
ko00360	Phenylalanine metabolism	Metabolism	1/53	14/2292	3.08895	0.279983	0.445195	1	AT2G24850	AT2G24850	K00815
ko01130	Biosynthesis of antibiotics	Metabolism	6/53	194/2292	1.33748	0.289348	0.445195	6	AT1G50460,AT2G24850,AT3G30775,AT4G33070,AT4G39980,AT5G28237,AT5G38710	AT1G50460,AT2G24850,AT3G30775,AT4G33070,AT4G39980,AT5G28237,AT5G38710	K00318,K00815,K00844,K01568,K01626,K01696
ko00350	Tyrosine metabolism	Metabolism	1/53	16/2292	2.70283	0.313104	0.445195	1	AT2G24850	AT2G24850	K00815
ko00480	Glutathione metabolism	Metabolism	1/53	16/2292	2.70283	0.313104	0.445195	1	AT2G29440,AT2G29450	AT2G29440,AT2G29450	K00799
ko00100	Steroid biosynthesis	Metabolism	1/53	18/2292	2.40252	0.344729	0.482621	1	AT1G76090	AT1G76090	K08242
ko00051	Fructose and mannose metabolism	Metabolism	1/53	19/2292	2.27607	0.360002	0.496366	1	AT1G50460	AT1G50460	K00844
ko00130	Ubiquinone and other terpenoid-quinone biosynthesis	Metabolism	1/53	20/2292	2.16226	0.374925	0.501737	1	AT2G24850	AT2G24850	K00815
ko00906	Carotenoid biosynthesis	Metabolism	1/53	20/2292	2.16226	0.374925	0.501737	1	AT3G14440,AT4G19170	AT3G14440,AT4G19170	K09840
ko01100	Metabolic pathways	Metabolism	21/53	861/2292	1.05476	0.428479	0.545086	21	AT1G14550,AT1G50460,AT2G19570,AT2G24850,AT2G44810,AT2G47550,AT3G09940,AT3G14440,AT3G17390,AT3G25760,AT3G25770,AT3G30775,AT3G55940,AT4G02780,AT4G08170,AT4G19170,AT4G33070,AT4G37410,AT4G37530,AT4G37770,AT4G39980,AT5G15120,AT5G25450,AT5G28237,AT5G38710,AT5G39580,AT5G58670	AT1G14550,AT1G50460,AT2G19570,AT2G24850,AT2G44810,AT2G47550,AT3G09940,AT3G14440,AT3G17390,AT3G25760,AT3G25770,AT3G30775,AT3G55940,AT4G02780,AT4G08170,AT4G19170,AT4G33070,AT4G37410,AT4G37530,AT4G37770,AT4G39980,AT5G15120,AT5G25450,AT5G28237,AT5G38710,AT5G39580,AT5G58670	K00318,K00417,K00430,K00517,K00789,K00815,K00844,K00913,K01051,K01489,K01568,K01626,K01696,K01762,K04120,K05857,K08232,K09840,K10525,K10712,K16818
ko00330	Arginine and proline metabolism	Metabolism	1/53	24/2292	1.80189	0.431277	0.545086	1	AT3G30775,AT5G38710	AT3G30775,AT5G38710	K00318
ko00940	Phenylpropanoid biosynthesis	Metabolism	1/53	24/2292	1.80189	0.431277	0.545086	1	AT1G14550,AT4G37530,AT5G39580	AT1G14550,AT4G37530,AT5G39580	K00430
ko00500	Starch and sucrose metabolism	Metabolism	1/53	30/2292	1.44151	0.506581	0.622957	1	AT1G50460	AT1G50460	K00844
ko00260	Glycine, serine and threonine metabolism	Metabolism	1/53	33/2292	1.31046	0.540472	0.63874	1	AT5G28237	AT5G28237	K01696
ko00564	Glycerophospholipid metabolism	Metabolism	1/53	35/2292	1.23558	0.561787	0.655418	1	AT2G44810	AT2G44810	K16818
ko00520	Amino sugar and nucleotide sugar metabolism	Metabolism	1/53	40/2292	1.08113	0.610919	0.686342	1	AT1G50460	AT1G50460	K00844
ko00240	Pyrimidine metabolism	Metabolism	1/53	73/2292	0.592401	0.823706	0.861578	1	AT2G19570	AT2G19570	K01489
ko01120	Microbial metabolism in diverse environments	Metabolism	2/53	145/2292	0.596487	0.859731	0.88904	2	AT1G50460,AT4G37410	AT1G50460,AT4G37410	K00517,K00844
ko00190	Oxidative phosphorylation	Metabolism	1/53	92/2292	0.470057	0.888843	0.901427	1	AT5G25450	AT5G25450	K00417
ko01200	Carbon metabolism	Metabolism	1/53	93/2292	0.465003	0.891521	0.901427	1	AT1G50460	AT1G50460	K00844

## Sheet: KEGG_GIP
TermID	Description	Category	GeneRatio	BgRatio	Enrich_factor	P_value	P_adjust	GeneCount	GeneIDs	GeneNames	KeggIDs
ko04141	Protein processing in endoplasmic reticulum	Genetic Information Processing	2/53	77/2292	1.12325	0.538024	0.63874	2	AT3G09440,AT4G21870	AT3G09440,AT4G21870	K03283,K13993
ko03018	RNA degradation	Genetic Information Processing	1/53	49/2292	0.882557	0.686106	0.752236	1	AT1G61470	AT1G61470	K12581
ko03040	Spliceosome	Genetic Information Processing	1/53	101/2292	0.428171	0.910784	0.910784	1	AT3G09440	AT3G09440	K03283

## Sheet: KEGG_CP
TermID	Description	Category	GeneRatio	BgRatio	Enrich_factor	P_value	P_adjust	GeneCount	GeneIDs	GeneNames	KeggIDs
ko04144	Endocytosis	Cellular Processes	3/53	54/2292	2.40252	0.127161	0.33062	3	AT2G17840,AT3G09440,AT5G03520	AT2G17840,AT3G09440,AT5G03520	K03283,K07901,K19366
ko02024	Quorum sensing	Cellular Processes	1/53	13/2292	3.32656	0.262839	0.43488	1	AT4G39980	AT4G39980	K01626
ko04530	Tight junction	Cellular Processes	1/53	14/2292	3.08895	0.279983	0.445195	1	AT5G03520	AT5G03520	K07901
ko04146	Peroxisome	Cellular Processes	1/53	36/2292	1.20126	0.572077	0.658975	1	AT4G33905	AT4G33905	K13348

## Sheet: KEGG_OS
TermID	Description	Category	GeneRatio	BgRatio	Enrich_factor	P_value	P_adjust	GeneCount	GeneIDs	GeneNames	KeggIDs
ko04626	Plant-pathogen interaction	Organismal Systems	4/53	37/2292	4.67517	0.00956934	0.210428	4	AT2G38470,AT3G59350,AT4G23550,AT5G15410	AT2G38470,AT3G59350,AT4G23550,AT5G15410	K05391,K13424,K13426,K13436
ko04910	Insulin signaling pathway	Organismal Systems	2/53	18/2292	4.80503	0.0633933	0.244393	2	AT1G50460,AT1G72470	AT1G50460,AT1G72470	K00844,K07195
ko04964	Proximal tubule bicarbonate reclamation	Organismal Systems	1/53	3/2292	14.4151	0.0678089	0.244393	1	AT4G24570	AT4G24570	K13577
ko04973	Carbohydrate digestion and absorption	Organismal Systems	1/53	3/2292	14.4151	0.0678089	0.244393	1	AT1G50460	AT1G50460	K00844
ko04972	Pancreatic secretion	Organismal Systems	1/53	4/2292	10.8113	0.089393	0.262412	1	AT5G03520	AT5G03520	K07901
ko04915	Estrogen signaling pathway	Organismal Systems	1/53	7/2292	6.1779	0.151246	0.362194	1	AT3G09440	AT3G09440	K03283
ko04727	GABAergic synapse	Organismal Systems	1/53	8/2292	5.40566	0.170932	0.370353	1	AT2G39130	AT2G39130	K15015
ko04612	Antigen processing and presentation	Organismal Systems	1/53	9/2292	4.80503	0.190171	0.382587	1	AT3G09440	AT3G09440	K03283
ko04921	Oxytocin signaling pathway	Organismal Systems	1/53	9/2292	4.80503	0.190171	0.382587	1	AT1G56070	AT1G56070	K03234
ko04213	Longevity regulating pathway - multiple species	Organismal Systems	1/53	12/2292	3.60377	0.245296	0.413369	1	AT3G09440	AT3G09440	K03283
ko04260	Cardiac muscle contraction	Organismal Systems	1/53	12/2292	3.60377	0.245296	0.413369	1	AT5G25450	AT5G25450	K00417
ko04919	Thyroid hormone signaling pathway	Organismal Systems	1/53	16/2292	2.70283	0.313104	0.445195	1	AT3G55940,AT5G58670	AT3G55940,AT5G58670	K05857
ko04721	Synaptic vesicle cycle	Organismal Systems	1/53	24/2292	1.80189	0.431277	0.545086	1	AT2G39130	AT2G39130	K15015
ko04723	Retrograde endocannabinoid signaling	Organismal Systems	1/53	33/2292	1.31046	0.540472	0.63874	1	AT2G39130	AT2G39130	K15015

## Sheet: KEGG_HD
TermID	Description	Category	GeneRatio	BgRatio	Enrich_factor	P_value	P_adjust	GeneCount	GeneIDs	GeneNames	KeggIDs
ko05033	Nicotine addiction	Human Diseases	1/53	1/2292	43.2453	0.0231239	0.210428	1	AT2G39130	AT2G39130	K15015
ko05032	Morphine addiction	Human Diseases	1/53	2/2292	21.6226	0.045723	0.244393	1	AT2G39130	AT2G39130	K15015
ko04933	AGE-RAGE signaling pathway in diabetic complications	Human Diseases	1/53	3/2292	14.4151	0.0678089	0.244393	1	AT3G55940,AT5G58670	AT3G55940,AT5G58670	K05857
ko05204	Chemical carcinogenesis	Human Diseases	1/53	3/2292	14.4151	0.0678089	0.244393	1	AT2G29440,AT2G29450	AT2G29440,AT2G29450	K00799
ko04930	Type II diabetes mellitus	Human Diseases	1/53	4/2292	10.8113	0.089393	0.262412	1	AT1G50460	AT1G50460	K00844
ko05145	Toxoplasmosis	Human Diseases	1/53	6/2292	7.20755	0.131101	0.331393	1	AT3G09440	AT3G09440	K03283
ko05134	Legionellosis	Human Diseases	1/53	11/2292	3.93139	0.227343	0.413369	1	AT3G09440	AT3G09440	K03283
ko05162	Measles	Human Diseases	1/53	11/2292	3.93139	0.227343	0.413369	1	AT3G09440	AT3G09440	K03283
ko05418	Fluid shear stress and atherosclerosis	Human Diseases	1/53	11/2292	3.93139	0.227343	0.413369	1	AT2G29440,AT2G29450	AT2G29440,AT2G29450	K00799
ko05230	Central carbon metabolism in cancer	Human Diseases	1/53	12/2292	3.60377	0.245296	0.413369	1	AT1G50460	AT1G50460	K00844
ko01524	Platinum drug resistance	Human Diseases	1/53	15/2292	2.88302	0.296735	0.445195	1	AT2G29440,AT2G29450	AT2G29440,AT2G29450	K00799
ko05164	Influenza A	Human Diseases	1/53	16/2292	2.70283	0.313104	0.445195	1	AT3G09440	AT3G09440	K03283
ko05169	Epstein-Barr virus infection	Human Diseases	2/53	64/2292	1.35142	0.43953	0.547908	2	AT3G09440,AT5G61780	AT3G09440,AT5G61780	K03283,K15979
ko05203	Viral carcinogenesis	Human Diseases	1/53	39/2292	1.10885	0.601546	0.684259	1	AT5G61780	AT5G61780	K15979
ko04932	Non-alcoholic fatty liver disease (NAFLD)	Human Diseases	1/53	45/2292	0.961006	0.654636	0.726486	1	AT5G25450	AT5G25450	K00417
ko05010	Alzheimer's disease	Human Diseases	1/53	58/2292	0.745608	0.746984	0.809233	1	AT5G25450	AT5G25450	K00417
ko05012	Parkinson's disease	Human Diseases	1/53	60/2292	0.720755	0.75885	0.812415	1	AT5G25450	AT5G25450	K00417
ko05016	Huntington's disease	Human Diseases	1/53	72/2292	0.600629	0.819394	0.861578	1	AT5G25450	AT5G25450	K00417
