# Supplementary material for: Molecular Targets and Biological Functions of cAMP Signaling in Arabidopsis
Source: Biomolecules. 2021 May 3;11(5):688. doi: 10.3390/biom11050688 (PMC8147800; doi:10.3390/biom11050688)
Supplement: Supplementary file 1 [file biomolecules-11-00688-s001.zip › Supplementary Data S5.xlsx]

## Sheet: GSEA_GO terms
Supplementary Data S5. GSEA analysis based on GO terms
TermID	Description	Size	enrichmentScore	NES	P_value	P_adjust	rank	leading_edge	core_enrichment
GO:0035556	intracellular signal transduction	489	-0.355349	-1.47846	0.00120048	0.2101	2400	tags=21%, list=12%, signal=19%	AT4G17615/AT2G43850/AT5G58700/AT5G52020/AT5G28080/AT3G47220/AT5G24430/AT2G30360/AT1G02900/AT5G57390/AT4G13950/AT5G67180/AT4G23650/AT2G26700/AT3G24715/AT1G78080/AT1G23490/AT3G51550/AT4G16110/AT2G31230/AT1G75840/AT2G20350/AT1G62400/AT3G07980/AT4G21940/AT5G25190/AT3G12690/AT1G20090/AT3G54320/AT3G16570/AT5G63770/AT5G11210/AT3G25170/AT1G22985/AT5G07310/AT3G10660/AT2G29120/AT3G54990/AT4G14580/AT3G15356…
GO:0048046	apoplast	398	-0.379249	-1.55855	0.00123001	0.2101	2772	tags=22%, list=14%, signal=19%	AT5G49910/AT1G09560/AT4G14880/AT2G01850/AT1G08260/AT5G38430/AT4G02520/AT4G11210/AT4G38700/AT3G55440/AT4G07820/AT3G49120/AT5G39160/AT4G25000/AT4G03210/AT1G72150/AT3G04200/AT1G32170/AT4G11190/AT3G26470/AT2G30870/AT1G02900/AT4G14130/AT2G43570/AT4G13950/AT2G06850/AT5G48100/AT1G64160/AT5G48070/AT1G58170/AT5G48485/AT1G19570/AT1G65310/AT4G34260/AT4G28365/AT5G09805/AT4G15980/AT1G35140/AT1G73965/AT1G72610…
GO:0006979	response to oxidative stress	386	-0.350599	-1.43626	0.00123305	0.2101	2720	tags=20%, list=13%, signal=18%	AT1G34190/AT1G16420/AT4G11830/AT1G59730/AT1G76080/AT4G34710/AT5G07460/AT5G63160/AT5G07320/AT5G66390/AT3G49120/AT3G63080/AT1G52200/AT3G01190/AT3G10985/AT4G11290/AT1G08830/AT3G53260/AT1G05240/AT2G29500/AT1G68850/AT5G17000/AT3G03670/AT5G19880/AT1G19570/AT1G07890/AT2G26150/AT1G77420/AT2G39770/AT3G53220/AT5G14130/AT5G46350/AT5G16970/AT1G09940/AT1G14870/AT1G19540/AT4G12400/AT5G44380/AT5G05340/AT3G57520…
GO:1901657	glycosyl compound metabolic process	207	-0.476931	-1.85607	0.00136054	0.2101	4280	tags=37%, list=21%, signal=30%	AT1G65860/AT4G04880/AT1G12140/AT1G45191/AT1G54040/AT1G55810/AT1G24100/AT3G03640/AT5G54060/AT2G36310/AT5G65860/AT1G62560/AT2G43910/AT1G02850/AT5G15950/AT2G25450/AT4G23100/AT1G60260/AT4G26510/AT1G16400/AT1G10700/AT1G61820/AT3G02470/AT1G68360/AT4G31500/AT1G16410/AT2G23190/AT1G61730/AT4G21760/AT5G63790/AT1G52400/AT2G22330/AT3G19710/AT1G17410/AT3G09260/AT1G24625/AT3G60130/AT1G66270/AT5G52020/AT5G36220…
GO:0009611	response to wounding	185	-0.461185	-1.77464	0.00137741	0.2101	3020	tags=34%, list=15%, signal=29%	AT4G13280/AT3G14840/AT1G79380/AT5G43580/AT1G30135/AT5G50200/AT2G22330/AT3G19710/AT4G34710/AT5G63970/AT2G38870/AT3G24550/AT2G34600/AT4G16760/AT4G24220/AT2G20340/AT1G19640/AT1G66760/AT1G78080/AT5G42650/AT2G32800/AT5G63770/AT4G23600/AT5G47240/AT1G71697/AT3G15356/AT1G01140/AT4G33720/AT5G04370/AT4G10390/AT3G45140/AT3G44550/AT3G51450/AT3G56700/AT5G60300/AT5G22500/AT3G17860/AT5G10300/AT1G74950/AT1G51760…
GO:1901136	carbohydrate derivative catabolic process	60	-0.621664	-2.00163	0.00161551	0.2101	2573	tags=33%, list=13%, signal=29%	AT3G09260/AT1G02360/AT3G60130/AT4G19720/AT2G43570/AT5G49900/AT4G19820/AT3G16410/AT2G44450/AT2G43610/AT3G16400/AT1G51470/AT1G47600/AT2G43620/AT5G10300/AT3G44320/AT4G19810/AT1G68760/AT2G19570
GO:1901658	glycosyl compound catabolic process	31	-0.735275	-2.11374	0.00170648	0.2101	2451	tags=35%, list=12%, signal=31%	AT3G60130/AT5G49900/AT3G16410/AT2G44450/AT3G16400/AT1G51470/AT1G47600/AT5G10300/AT3G44320/AT2G19570
GO:0009694	jasmonic acid metabolic process	22	-0.839998	-2.24516	0.0017331	0.2101	2225	tags=59%, list=11%, signal=53%	AT1G19640/AT5G42650/AT5G07010/AT3G25780/AT3G45140/AT3G48520/AT2G06050/AT2G46370/AT1G44350/AT3G25770/AT3G25760/AT1G05800
GO:0004709	MAP kinase kinase kinase activity	19	-0.733888	-1.89161	0.0017452	0.2101	962	tags=63%, list=5%, signal=60%	AT4G08470/AT4G36950/AT4G08500/AT1G08720/AT1G05100/AT1G53570/AT1G07150/AT5G67080/AT4G26890/AT2G32510/AT5G55090
GO:0006213	pyrimidine nucleoside metabolic process	16	-0.807601	-1.98674	0.00176367	0.2101	2	tags=38%, list=0%, signal=38%	AT1G71100/AT1G55810/AT2G36310/AT4G26510/AT2G19570
GO:0009695	jasmonic acid biosynthetic process	16	-0.816025	-2.00746	0.00176367	0.2101	2225	tags=50%, list=11%, signal=45%	AT5G42650/AT3G25780/AT3G45140/AT2G06050/AT3G25770/AT3G25760/AT1G05800
GO:0004864	protein phosphatase inhibitor activity	13	-0.792103	-1.87967	0.00177936	0.2101	2787	tags=69%, list=14%, signal=60%	AT4G17870/AT5G52200/AT2G31305/AT4G01026/AT2G40330/AT2G38310/AT5G05440/AT5G46790
GO:0016814	hydrolase activity, acting on carbon-nitrogen (but not peptide) bonds, in cyclic amidines	20	-0.795605	-2.05318	0.00177936	0.2101	2	tags=20%, list=0%, signal=20%	AT2G38660/AT4G04880/AT2G19570
GO:0032544	plastid translation	12	-0.787938	-1.81585	0.00178253	0.2101	46	tags=25%, list=0%, signal=25%	AT3G62910/AT1G79850
GO:0019239	deaminase activity	11	-0.867779	-1.93901	0.00185185	0.2101	2	tags=18%, list=0%, signal=18%	AT2G19570
GO:0072503	cellular divalent inorganic cation homeostasis	15	0.758963	1.9661	0.00226244	0.2101	2147	tags=27%, list=11%, signal=24%	AT3G12030/AT2G38170/AT3G51860/AT5G14870
GO:0000326	protein storage vacuole	16	0.765998	2.00734	0.00229885	0.2101	532	tags=38%, list=3%, signal=37%	AT1G49320/AT4G28520/AT1G03890/AT1G73190/AT5G44120/AT1G03880
GO:0051090	regulation of DNA-binding transcription factor activity	16	0.720985	1.88938	0.00229885	0.2101	695	tags=25%, list=3%, signal=24%	AT1G32640/AT3G56710/AT2G41180/AT1G79030
GO:0000322	storage vacuole	17	0.753715	1.98883	0.00230415	0.2101	532	tags=35%, list=3%, signal=34%	AT1G49320/AT4G28520/AT1G03890/AT1G73190/AT5G44120/AT1G03880
GO:0010268	brassinosteroid homeostasis	21	0.715132	2.01955	0.00232019	0.2101	1626	tags=38%, list=8%, signal=35%	AT4G15310/AT1G65670/AT5G45340/AT3G13730/AT2G26710/AT5G05690/AT4G36380/AT4G15393
GO:0004650	polygalacturonase activity	33	0.612693	1.93545	0.00239234	0.2101	3933	tags=58%, list=19%, signal=47%	AT1G80170/AT1G60590/AT3G48950/AT2G41850/AT3G15720/AT4G33440/AT5G14650/AT3G62110/AT1G10640/AT3G61490/AT3G07830/AT3G57510/AT5G49215/AT1G48100/AT3G07970/AT3G42950/AT5G48140/AT3G14040/AT3G07850
GO:0006816	calcium ion transport	31	0.601214	1.85994	0.00240385	0.2101	1311	tags=16%, list=6%, signal=15%	AT3G12030/AT4G35290/AT2G29100/AT2G38170/AT1G05200
GO:0016128	phytosteroid metabolic process	31	0.624779	1.93285	0.00240385	0.2101	1626	tags=29%, list=8%, signal=27%	AT4G15310/AT1G65670/AT5G45340/AT2G36800/AT3G13730/AT2G26710/AT5G05690/AT4G36380/AT4G15393
GO:0016131	brassinosteroid metabolic process	26	0.681342	1.9964	0.00240385	0.2101	1626	tags=35%, list=8%, signal=32%	AT4G15310/AT1G65670/AT5G45340/AT2G36800/AT3G13730/AT2G26710/AT5G05690/AT4G36380/AT4G15393
GO:0009834	plant-type secondary cell wall biogenesis	39	0.610065	1.99922	0.002457	0.2101	3466	tags=54%, list=17%, signal=45%	AT4G33450/AT1G32770/AT3G61910/AT5G15630/AT2G46770/AT1G17950/AT5G44030/AT1G75500/AT2G40320/AT2G36570/AT2G38080/AT4G18780/AT5G12870/AT2G15440/AT4G36890/AT5G17420/AT3G50220/AT1G27440/AT5G60490/AT5G03170/AT5G46340
GO:0055088	lipid homeostasis	39	0.573231	1.87851	0.002457	0.2101	1626	tags=26%, list=8%, signal=24%	AT4G15310/AT1G65670/AT1G68570/AT5G45340/AT3G13730/AT2G26710/AT1G42550/AT5G05690/AT4G36380/AT4G15393
GO:0019748	secondary metabolic process	381	-0.348059	-1.42462	0.00247219	0.2101	3843	tags=33%, list=19%, signal=27%	AT4G20240/AT1G02920/AT1G62560/AT2G43910/AT1G80820/AT2G45560/AT2G25450/AT2G45580/AT2G37040/AT4G23100/AT4G34850/AT2G36880/AT1G16400/AT1G50520/AT4G39940/AT1G78370/AT1G13710/AT2G39410/AT4G34230/AT1G61820/AT2G29720/AT1G01190/AT4G30210/AT1G49860/AT1G68360/AT1G73290/AT4G31500/AT1G16410/AT1G17190/AT1G02930/AT2G23190/AT3G62160/AT1G76470/AT1G61730/AT3G12220/AT5G63790/AT1G09500/AT2G22330/AT3G19710/AT4G13310…
GO:0006790	sulfur compound metabolic process	340	-0.361235	-1.46138	0.00256739	0.2101	4843	tags=36%, list=24%, signal=28%	AT5G26220/AT1G10360/AT3G59760/AT3G22890/AT1G04580/AT2G38040/AT5G64000/AT5G23010/AT4G04770/AT3G55040/AT4G12030/AT1G21120/AT4G13430/AT3G13110/AT5G41220/AT1G17170/AT4G33790/AT3G24030/AT2G02930/AT5G14200/AT5G02790/AT4G21990/AT1G65860/AT1G12140/AT1G54040/AT5G01310/AT1G24100/AT4G04610/AT5G43780/AT1G02920/AT5G65860/AT1G62560/AT2G43910/AT5G15950/AT2G25450/AT5G63990/AT4G23100/AT2G36880/AT1G16400/AT4G26910…
GO:0010051	xylem and phloem pattern formation	64	0.52958	1.89956	0.0026178	0.2101	3222	tags=42%, list=16%, signal=36%	AT2G32010/AT4G17220/AT3G54720/AT2G01950/AT1G05470/AT1G73590/AT3G09160/AT5G10250/AT5G01170/AT1G78120/AT1G04550/AT2G21050/AT4G08150/AT3G22810/AT1G31770/AT5G02030/AT3G09070/AT5G43870/AT4G32780/AT1G11130/AT4G36890/AT5G46700/AT4G14740/AT5G51730/AT5G60690/AT5G49660/AT1G19850
GO:0009873	ethylene-activated signaling pathway	153	-0.459758	-1.72942	0.00283286	0.2101	2023	tags=31%, list=10%, signal=28%	AT5G67180/AT1G78080/AT3G51550/AT4G16110/AT2G31230/AT2G20350/AT5G25190/AT3G54320/AT1G22985/AT5G07310/AT3G54990/AT3G15356/AT4G27950/AT2G25490/AT1G53910/AT1G71520/AT3G14230/AT4G28140/AT1G03800/AT5G40990/AT5G10720/AT1G13260/AT5G44210/AT5G61590/AT2G23340/AT2G44940/AT3G50260/AT3G60490/AT3G24500/AT5G61890/AT4G36900/AT2G28550/AT1G72360/AT5G53290/AT1G25560/AT1G22810/AT2G20880/AT1G10480/AT4G32800/AT1G68840…
GO:0000160	phosphorelay signal transduction system	170	-0.442528	-1.68058	0.00283688	0.2101	2023	tags=28%, list=10%, signal=26%	AT5G67180/AT1G78080/AT3G51550/AT4G16110/AT2G31230/AT2G20350/AT5G25190/AT3G54320/AT1G22985/AT5G07310/AT3G54990/AT3G15356/AT4G27950/AT2G25490/AT1G53910/AT1G71520/AT3G14230/AT4G28140/AT1G03800/AT5G40990/AT5G10720/AT1G13260/AT5G44210/AT5G61590/AT3G21510/AT2G23340/AT2G44940/AT3G50260/AT3G60490/AT3G24500/AT5G61890/AT4G36900/AT2G28550/AT1G72360/AT5G53290/AT1G25560/AT1G22810/AT2G20880/AT1G10480/AT4G32800…
GO:0005622	intracellular	142	-0.460912	-1.71853	0.00287356	0.2101	2772	tags=32%, list=14%, signal=28%	AT5G45810/AT2G32400/AT3G23805/AT1G07940/AT1G29230/AT4G14010/AT5G45820/AT3G51770/AT5G18610/AT1G17410/AT3G47220/AT2G30360/AT4G35870/AT1G02900/AT5G15930/AT4G13950/AT3G51550/AT3G14530/AT3G16570/AT5G63770/AT5G40890/AT5G11210/AT5G41730/AT3G25170/AT3G07890/AT5G52580/AT3G15356/AT1G12220/AT5G07070/AT4G18700/AT5G40990/AT3G29430/AT2G34180/AT5G07920/AT1G76690/AT3G05490/AT5G01760/AT4G14640/AT5G01810/AT5G58670…
GO:0010200	response to chitin	113	0.502406	1.97069	0.00298507	0.2101	1562	tags=37%, list=8%, signal=35%	AT1G32640/AT5G51190/AT5G47230/AT3G18710/AT4G23810/AT3G21150/AT2G40140/AT2G38470/AT5G27420/AT3G16720/AT5G67450/AT2G46400/AT2G44840/AT3G55980/AT3G02840/AT1G20823/AT3G46080/AT3G46090/AT3G46600/AT4G17490/AT5G03680/AT3G19380/AT1G27730/AT3G49530/AT1G51700/AT3G50060/AT5G59820/AT4G18880/AT3G56400/AT2G33580/AT3G19580/AT1G80840/AT5G59450/AT5G64660/AT3G46620/AT1G42990/AT3G23230/AT3G45640/AT1G07520/AT5G09800…
GO:0016999	antibiotic metabolic process	109	-0.483222	-1.729	0.003003	0.2101	2363	tags=28%, list=12%, signal=24%	AT3G49120/AT3G01190/AT4G11290/AT2G43430/AT1G18870/AT1G05240/AT1G68850/AT5G36880/AT3G03670/AT5G24530/AT5G19880/AT1G07890/AT4G10500/AT5G14130/AT4G39030/AT2G44450/AT5G05340/AT5G64100/AT5G06720/AT5G17820/AT3G28200/AT2G23580/AT4G10490/AT1G30870/AT1G05250/AT5G39580/AT4G26010/AT4G37530/AT1G14550
GO:0016143	S-glycoside metabolic process	102	-0.494865	-1.7602	0.0030303	0.2101	4965	tags=53%, list=24%, signal=40%	AT1G74100/AT1G04580/AT5G23010/AT4G12030/AT1G21120/AT4G13430/AT5G14200/AT1G65860/AT1G12140/AT1G54040/AT1G24100/AT1G62560/AT2G43910/AT2G25450/AT4G23100/AT1G16400/AT1G68360/AT4G31500/AT1G16410/AT2G23190/AT1G61730/AT5G63790/AT2G22330/AT3G19710/AT3G09260/AT1G24625/AT3G60130/AT5G52020/AT5G36220/AT4G01120/AT4G28410/AT2G30590/AT5G53810/AT1G65880/AT3G16410/AT4G37400/AT2G44450/AT1G12610/AT3G28740/AT3G16400…
GO:0019757	glycosinolate metabolic process	102	-0.494865	-1.7602	0.0030303	0.2101	4965	tags=53%, list=24%, signal=40%	AT1G74100/AT1G04580/AT5G23010/AT4G12030/AT1G21120/AT4G13430/AT5G14200/AT1G65860/AT1G12140/AT1G54040/AT1G24100/AT1G62560/AT2G43910/AT2G25450/AT4G23100/AT1G16400/AT1G68360/AT4G31500/AT1G16410/AT2G23190/AT1G61730/AT5G63790/AT2G22330/AT3G19710/AT3G09260/AT1G24625/AT3G60130/AT5G52020/AT5G36220/AT4G01120/AT4G28410/AT2G30590/AT5G53810/AT1G65880/AT3G16410/AT4G37400/AT2G44450/AT1G12610/AT3G28740/AT3G16400…
GO:0019760	glucosinolate metabolic process	102	-0.494865	-1.7602	0.0030303	0.2101	4965	tags=53%, list=24%, signal=40%	AT1G74100/AT1G04580/AT5G23010/AT4G12030/AT1G21120/AT4G13430/AT5G14200/AT1G65860/AT1G12140/AT1G54040/AT1G24100/AT1G62560/AT2G43910/AT2G25450/AT4G23100/AT1G16400/AT1G68360/AT4G31500/AT1G16410/AT2G23190/AT1G61730/AT5G63790/AT2G22330/AT3G19710/AT3G09260/AT1G24625/AT3G60130/AT5G52020/AT5G36220/AT4G01120/AT4G28410/AT2G30590/AT5G53810/AT1G65880/AT3G16410/AT4G37400/AT2G44450/AT1G12610/AT3G28740/AT3G16400…
GO:0017001	antibiotic catabolic process	77	-0.522172	-1.76056	0.00312013	0.2101	2363	tags=32%, list=12%, signal=29%	AT3G49120/AT3G01190/AT4G11290/AT2G43430/AT1G05240/AT1G68850/AT3G03670/AT5G24530/AT5G19880/AT1G07890/AT4G10500/AT5G14130/AT5G05340/AT5G64100/AT5G06720/AT5G17820/AT3G28200/AT4G10490/AT1G30870/AT1G05250/AT5G39580/AT4G26010/AT4G37530/AT1G14550
GO:0031406	carboxylic acid binding	59	-0.565282	-1.81715	0.00321543	0.2101	3345	tags=27%, list=16%, signal=23%	AT4G33910/AT1G05010/AT1G20270/AT4G17870/AT3G63010/AT4G01026/AT5G48485/AT3G01990/AT1G48740/AT5G43660/AT1G12420/AT2G40330/AT2G38310/AT5G05440/AT5G46790
GO:0043177	organic acid binding	59	-0.565282	-1.81715	0.00321543	0.2101	3345	tags=27%, list=16%, signal=23%	AT4G33910/AT1G05010/AT1G20270/AT4G17870/AT3G63010/AT4G01026/AT5G48485/AT3G01990/AT1G48740/AT5G43660/AT1G12420/AT2G40330/AT2G38310/AT5G05440/AT5G46790
GO:0019208	phosphatase regulator activity	34	-0.636062	-1.86254	0.003367	0.2101	2978	tags=38%, list=15%, signal=33%	AT5G47790/AT4G08960/AT4G17870/AT1G13460/AT5G52200/AT2G31305/AT4G01026/AT4G15410/AT2G40330/AT2G38310/AT5G05440/AT5G46790
GO:0007389	pattern specification process	153	0.456747	1.88276	0.00337838	0.2101	3297	tags=36%, list=16%, signal=30%	AT3G10590/AT2G32010/AT4G17220/AT3G54720/AT2G45450/AT1G32240/AT1G70510/AT2G01950/AT1G23080/AT2G27990/AT2G31160/AT5G03680/AT1G05470/AT1G73590/AT3G09160/AT5G10250/AT1G16510/AT5G01170/AT1G78120/AT1G04550/AT5G01200/AT2G21050/AT2G31650/AT1G69270/AT4G31400/AT2G17820/AT1G75820/AT4G08150/AT3G22810/AT2G41370/AT1G28560/AT1G80180/AT1G31770/AT3G44750/AT5G59340/AT5G02030/AT1G69180/AT2G38090/AT3G09070/AT2G37630…
GO:0045333	cellular respiration	31	-0.639525	-1.83848	0.00341297	0.2101	5389	tags=58%, list=27%, signal=43%	AT3G15640/AT3G02090/AT5G66760/AT4G37830/AT4G28070/AT2G44520/AT1G22840/AT1G52710/AT3G27380/AT5G40650/AT4G10040/AT4G30490/AT5G67490/AT5G51060/AT3G27220/AT5G25450/AT5G15120
GO:0019888	protein phosphatase regulator activity	33	-0.647087	-1.88239	0.00342466	0.2101	2978	tags=39%, list=15%, signal=34%	AT5G47790/AT4G08960/AT4G17870/AT1G13460/AT5G52200/AT2G31305/AT4G01026/AT4G15410/AT2G40330/AT2G38310/AT5G05440/AT5G46790
GO:0030091	protein repair	24	-0.677667	-1.86163	0.00343053	0.2101	708	tags=17%, list=3%, signal=16%	AT4G21850/AT4G04840/AT4G21830
GO:0016762	xyloglucan:xyloglucosyl transferase activity	27	-0.698565	-1.94468	0.0034662	0.2101	2699	tags=56%, list=13%, signal=48%	AT4G03210/AT1G32170/AT4G14130/AT2G06850/AT5G48070/AT1G65310/AT4G30290/AT4G30270/AT4G30280/AT5G57550/AT3G23730/AT4G25810/AT2G18800/AT1G10550
GO:0019212	phosphatase inhibitor activity	14	-0.774749	-1.86125	0.00355872	0.2101	2787	tags=64%, list=14%, signal=56%	AT4G17870/AT5G52200/AT2G31305/AT4G01026/AT2G40330/AT2G38310/AT5G05440/AT5G46790
GO:0033293	monocarboxylic acid binding	20	-0.678317	-1.7505	0.00355872	0.2101	2509	tags=35%, list=12%, signal=31%	AT4G01026/AT5G48485/AT2G40330/AT2G38310/AT5G05440/AT5G46790
GO:0010243	response to organonitrogen compound	209	0.392216	1.67001	0.00369004	0.2101	1562	tags=23%, list=8%, signal=21%	AT1G32640/AT5G51190/AT5G47230/AT3G18710/AT4G23810/AT3G21150/AT2G40140/AT2G38470/AT5G27420/AT3G16720/AT5G67450/AT2G46400/AT2G44840/AT3G55980/AT3G02840/AT1G20823/AT3G46080/AT3G46090/AT3G46600/AT4G17490/AT5G03680/AT3G19380/AT1G27730/AT3G49530/AT1G51700/AT3G50060/AT5G59820/AT4G18880/AT3G56400/AT4G35290/AT2G33580/AT2G29100/AT3G19580/AT1G80840/AT5G59450/AT5G64660/AT3G46620/AT1G42990/AT3G23230/AT3G45640…
GO:0010427	abscisic acid binding	11	-0.771733	-1.7244	0.0037037	0.2101	412	tags=55%, list=2%, signal=53%	AT4G01026/AT2G40330/AT2G38310/AT5G05440/AT5G46790
GO:0030308	negative regulation of cell growth	11	-0.780287	-1.74352	0.0037037	0.2101	2103	tags=55%, list=10%, signal=49%	AT3G51550/AT4G20260/AT4G17470/AT5G52240/AT1G05800
GO:0035304	regulation of protein dephosphorylation	11	-0.794529	-1.77534	0.0037037	0.2101	2787	tags=55%, list=14%, signal=47%	AT4G08960/AT4G17870/AT5G52200/AT2G31305/AT5G46790
GO:0051301	cell division	248	0.369482	1.60613	0.00404858	0.2101	5731	tags=40%, list=28%, signal=29%	AT1G74930/AT5G61600/AT3G60550/AT1G46480/AT4G22410/AT5G03150/AT2G42290/AT5G61480/AT4G17490/AT1G46264/AT2G45080/AT3G49860/AT4G11280/AT1G20700/AT1G63680/AT5G44160/AT5G58370/AT2G19710/AT1G15570/AT1G67510/AT1G13448/AT5G20450/AT2G01210/AT4G31400/AT2G29680/AT4G34160/AT5G47220/AT2G21800/AT4G30710/AT3G21870/AT1G20720/AT5G48600/AT1G69400/AT5G03280/AT1G28370/AT3G57830/AT1G44110/AT5G61330/AT1G73740/AT2G37630…
GO:1901698	response to nitrogen compound	254	0.361164	1.57022	0.00413223	0.2101	1562	tags=21%, list=8%, signal=20%	AT1G32640/AT5G51190/AT5G47230/AT3G18710/AT4G23810/AT3G21150/AT2G40140/AT2G38470/AT5G27420/AT3G16720/AT5G67450/AT1G76800/AT2G46400/AT2G44840/AT3G55980/AT5G04950/AT3G02840/AT1G20823/AT3G46080/AT3G46090/AT3G46600/AT4G17490/AT5G03680/AT3G19380/AT1G27730/AT3G49530/AT1G51700/AT3G50060/AT5G59820/AT4G18880/AT1G05850/AT3G56400/AT4G35290/AT2G33580/AT2G29100/AT3G19580/AT1G80840/AT5G59450/AT5G64660/AT3G46620…
GO:0006874	cellular calcium ion homeostasis	11	0.835909	2.00536	0.004329	0.2101	1	tags=9%, list=0%, signal=9%	AT3G12030
GO:0016765	transferase activity, transferring alkyl or aryl (other than methyl) groups	133	-0.462308	-1.70945	0.00437956	0.2101	4835	tags=40%, list=24%, signal=31%	AT3G59760/AT5G44000/AT3G55040/AT4G34640/AT5G41220/AT1G17170/AT2G02930/AT5G02790/AT2G39550/AT2G44520/AT2G02390/AT1G02920/AT2G36880/AT3G23630/AT1G78370/AT2G34630/AT1G49860/AT4G34650/AT1G17190/AT1G02930/AT2G23410/AT4G14880/AT1G78510/AT4G02520/AT2G47730/AT5G62480/AT2G27760/AT2G30870/AT2G29420/AT3G62760/AT1G09240/AT1G22410/AT3G14530/AT1G19570/AT1G25410/AT2G29470/AT3G09270/AT2G29490/AT2G29460/AT3G63110…
GO:0009299	mRNA transcription	12	0.823211	2.02273	0.00453515	0.2101	1157	tags=50%, list=6%, signal=47%	AT5G28490/AT4G18610/AT2G31160/AT3G23290/AT1G78815/AT1G07090
GO:0008356	asymmetric cell division	20	0.668492	1.87093	0.00454546	0.2101	3794	tags=55%, list=19%, signal=45%	AT5G03150/AT2G42290/AT1G46264/AT5G44160/AT1G67510/AT2G01210/AT3G57830/AT2G37630/AT1G55540/AT2G02080/AT4G37650
GO:0016132	brassinosteroid biosynthetic process	21	0.689015	1.94579	0.00464037	0.2101	1626	tags=33%, list=8%, signal=31%	AT4G15310/AT1G65670/AT5G45340/AT3G13730/AT5G05690/AT4G36380/AT4G15393
GO:0120178	steroid hormone biosynthetic process	21	0.689015	1.94579	0.00464037	0.2101	1626	tags=33%, list=8%, signal=31%	AT4G15310/AT1G65670/AT5G45340/AT3G13730/AT5G05690/AT4G36380/AT4G15393
GO:0048507	meristem development	22	0.659825	1.87013	0.00470588	0.2101	1637	tags=50%, list=8%, signal=46%	AT1G46480/AT3G54720/AT5G61480/AT1G05470/AT1G21590/AT4G32880/AT1G65380/AT1G69270/AT2G41510/AT4G02010/AT4G13195
GO:0048878	chemical homeostasis	322	0.382994	1.7086	0.00471698	0.2101	2240	tags=20%, list=11%, signal=18%	AT3G12030/AT4G15310/AT1G77110/AT1G76800/AT1G65670/AT5G52750/AT4G27260/AT1G68570/AT5G61350/AT2G01420/AT3G56980/AT5G45340/AT3G24450/AT4G37390/AT1G23080/AT2G01830/AT1G73590/AT2G37460/AT2G47160/AT5G52760/AT4G16370/AT3G13730/AT2G28660/AT5G04150/AT5G57130/AT1G03120/AT3G53720/AT2G26710/AT1G42550/AT5G63530/AT4G34600/AT5G54510/AT1G70940/AT2G38170/AT5G24380/AT5G05690/AT1G74810/AT3G06130/AT4G36380/AT1G32450…
GO:0051336	regulation of hydrolase activity	81	-0.499565	-1.69536	0.00472441	0.2101	2966	tags=27%, list=15%, signal=23%	AT1G32740/AT4G08960/AT4G17870/AT4G28480/AT3G50850/AT5G52200/AT2G31305/AT5G15930/AT3G17980/AT2G01540/AT3G16420/AT3G07890/AT5G52580/AT1G70790/AT3G02460/AT4G28550/AT4G27100/AT4G17470/AT4G16500/AT4G19700/AT5G46790
GO:0010411	xyloglucan metabolic process	48	-0.585232	-1.8281	0.00487013	0.2101	3359	tags=44%, list=17%, signal=37%	AT3G06550/AT3G62720/AT2G01850/AT4G03210/AT1G32170/AT4G14130/AT2G06850/AT5G48070/AT1G65310/AT1G74380/AT4G30290/AT1G70230/AT4G30270/AT2G20370/AT4G30280/AT5G57550/AT3G23730/AT4G25810/AT2G18800/AT1G10550
GO:0005811	lipid droplet	37	0.550512	1.77777	0.004914	0.2101	2528	tags=38%, list=12%, signal=33%	AT1G05510/AT5G50600/AT5G50700/AT5G55240/AT4G26740/AT3G27660/AT2G25890/AT4G25140/AT5G07600/AT5G07520/AT5G40420/AT3G57140/AT1G70680/AT2G47780
GO:0098772	molecular function regulator	382	-0.341437	-1.39703	0.00493827	0.2101	3102	tags=20%, list=15%, signal=18%	AT4G19600/AT2G43120/AT3G17660/AT3G21660/AT5G47550/AT5G47790/AT4G14010/AT5G43580/AT1G11580/AT4G08960/AT2G26440/AT4G17870/AT5G64640/AT1G13460/AT2G38870/AT4G28480/AT1G53840/AT2G28330/AT5G52200/AT1G02900/AT2G31305/AT5G15930/AT4G13950/AT4G18300/AT4G01026/AT5G20860/AT1G64160/AT1G23490/AT3G17980/AT2G01540/AT4G15980/AT4G15410/AT3G10525/AT3G16570/AT3G16420/AT1G74340/AT5G64620/AT3G25170/AT3G07890/AT5G52580…
GO:0030234	enzyme regulator activity	301	-0.366999	-1.47167	0.00510204	0.2101	3102	tags=26%, list=15%, signal=23%	AT1G70800/AT3G15730/AT4G33220/AT5G37740/AT4G01900/AT5G12140/AT3G47940/AT2G26590/AT5G53000/AT2G37550/AT1G23205/AT3G10720/AT5G50550/AT4G11920/AT4G17640/AT4G19600/AT2G43120/AT3G17660/AT3G21660/AT5G47550/AT5G47790/AT5G43580/AT1G11580/AT4G08960/AT2G26440/AT4G17870/AT5G64640/AT1G13460/AT2G38870/AT4G28480/AT1G53840/AT2G28330/AT5G52200/AT2G31305/AT5G15930/AT4G01026/AT5G20860/AT1G64160/AT1G23490/AT3G17980…
GO:0042562	hormone binding	31	-0.607319	-1.7459	0.00511945	0.2101	2509	tags=35%, list=12%, signal=31%	AT3G63010/AT1G12820/AT4G01026/AT3G23150/AT3G26810/AT1G72180/AT2G40330/AT2G38310/AT5G05440/AT5G46790
GO:0045735	nutrient reservoir activity	47	0.53009	1.78807	0.00512821	0.2101	1225	tags=28%, list=6%, signal=26%	AT3G04170/AT4G28520/AT1G03890/AT3G04190/AT3G22640/AT2G18540/AT5G44120/AT4G27160/AT4G27140/AT1G03880/AT2G28490/AT5G54740/AT5G39120
GO:0016887	ATPase activity	361	0.300076	1.35736	0.00518135	0.2101	7116	tags=46%, list=35%, signal=30%	AT4G05380/AT4G30250/AT3G50930/AT5G40000/AT1G51380/AT3G28510/AT1G05460/AT5G04895/AT4G04180/AT2G46620/AT2G24250/AT4G02070/AT4G24860/AT3G24320/AT5G19210/AT3G10310/AT1G18410/AT1G20720/AT1G21730/AT1G48650/AT2G21300/AT3G09660/AT5G27680/AT3G18524/AT1G24290/AT3G28540/AT3G10140/AT5G47820/AT3G12810/AT1G08060/AT3G56690/AT1G09100/AT4G01020/AT1G03190/AT5G63630/AT2G35340/AT4G35740/AT4G26660/AT3G02060/AT4G15850…
GO:0043178	alcohol binding	22	-0.673398	-1.79986	0.00519931	0.2101	2509	tags=41%, list=12%, signal=36%	AT1G12820/AT4G01026/AT3G26810/AT1G42470/AT2G40330/AT2G38310/AT5G05440/AT5G46790
GO:0003777	microtubule motor activity	60	0.481863	1.71735	0.00522193	0.2101	7220	tags=70%, list=36%, signal=45%	AT3G10310/AT1G18410/AT1G21730/AT2G21300/AT5G47820/AT4G26660/AT3G20150/AT3G44050/AT5G54670/AT3G51150/AT5G06670/AT3G16060/AT1G63640/AT3G49650/AT5G02370/AT2G22610/AT4G14330/AT4G27180/AT5G33300/AT5G65930/AT1G18550/AT2G21380/AT3G44730/AT4G14150/AT3G19050/AT4G21270/AT5G66310/AT3G45850/AT2G28620/AT3G23670/AT1G59540/AT2G36200/AT1G18370/AT3G43210/AT2G37420/AT5G60930/AT1G55550/AT5G27550/AT2G47500/AT3G17360…
GO:0072511	divalent inorganic cation transport	60	0.515336	1.83665	0.00522193	0.2101	2947	tags=25%, list=15%, signal=21%	AT3G12030/AT1G05300/AT2G30080/AT5G59520/AT4G35290/AT2G29100/AT2G38170/AT1G55910/AT1G05200/AT2G19110/AT1G60960/AT3G51480/AT2G29110/AT5G48400/AT4G35920
GO:0042493	response to drug	391	0.317225	1.45048	0.005291	0.2101	1253	tags=17%, list=6%, signal=17%	AT1G32640/AT5G51190/AT5G47230/AT3G18710/AT4G23810/AT3G21150/AT2G40140/AT2G38470/AT5G27420/AT3G16720/AT5G67450/AT1G76800/AT2G46400/AT4G33710/AT4G14390/AT2G44840/AT3G55980/AT5G04950/AT3G02840/AT1G20823/AT2G46410/AT3G46080/AT1G14480/AT3G46090/AT3G46600/AT4G17490/AT5G42380/AT1G18570/AT5G24110/AT5G03680/AT3G19380/AT5G54610/AT3G61190/AT1G27730/AT3G49530/AT2G37710/AT1G51700/AT1G06180/AT1G79180/AT3G50060…
GO:0005871	kinesin complex	58	0.512532	1.81443	0.00530504	0.2101	7220	tags=72%, list=36%, signal=47%	AT3G10310/AT1G18410/AT1G21730/AT2G21300/AT5G47820/AT4G26660/AT3G20150/AT3G44050/AT5G54670/AT3G51150/AT5G06670/AT3G16060/AT1G63640/AT3G49650/AT5G02370/AT2G22610/AT4G14330/AT4G27180/AT5G33300/AT5G65930/AT1G18550/AT2G21380/AT3G44730/AT4G14150/AT3G19050/AT4G21270/AT5G66310/AT3G45850/AT2G28620/AT3G23670/AT1G59540/AT2G36200/AT1G18370/AT3G43210/AT2G37420/AT5G60930/AT1G55550/AT5G27550/AT2G47500/AT3G17360…
GO:0070838	divalent metal ion transport	58	0.521069	1.84466	0.00530504	0.2101	2947	tags=26%, list=15%, signal=22%	AT3G12030/AT1G05300/AT2G30080/AT5G59520/AT4G35290/AT2G29100/AT2G38170/AT1G55910/AT1G05200/AT2G19110/AT1G60960/AT3G51480/AT2G29110/AT5G48400/AT4G35920
GO:0019840	isoprenoid binding	15	-0.725987	-1.76325	0.00535714	0.2101	2509	tags=47%, list=12%, signal=41%	AT3G63010/AT4G01026/AT2G40330/AT2G38310/AT5G05440/AT5G46790
GO:0009738	abscisic acid-activated signaling pathway	228	-0.395652	-1.54821	0.00539084	0.2101	2509	tags=23%, list=12%, signal=21%	AT2G22430/AT4G17615/AT1G24625/AT3G57120/AT5G24430/AT5G41790/AT1G12240/AT3G07360/AT4G23650/AT4G01026/AT3G51550/AT4G18010/AT3G17980/AT2G01540/AT4G21940/AT3G59220/AT1G18100/AT1G10560/AT3G10660/AT1G70790/AT1G12680/AT5G59550/AT5G65160/AT5G47670/AT3G11410/AT1G62660/AT1G15100/AT1G02340/AT1G07150/AT5G60820/AT5G10720/AT3G44460/AT1G51800/AT2G01150/AT3G18040/AT5G52900/AT5G67080/AT5G01810/AT2G40330/AT4G26890…
GO:0006875	cellular metal ion homeostasis	82	0.475211	1.79173	0.00544959	0.2101	2173	tags=21%, list=11%, signal=19%	AT3G12030/AT1G76800/AT5G52750/AT3G24450/AT5G52760/AT4G16370/AT2G28660/AT3G53720/AT5G63530/AT2G38170/AT3G06130/AT5G26690/AT5G52740/AT3G51860/AT1G23000/AT5G14870/AT1G21140
GO:0046527	glucosyltransferase activity	179	-0.419688	-1.6062	0.00558659	0.2101	2760	tags=26%, list=14%, signal=23%	AT2G01850/AT2G29750/AT3G07020/AT2G15490/AT2G25540/AT1G07240/AT4G03210/AT1G32170/AT3G55710/AT4G14130/AT4G15280/AT2G06850/AT2G29730/AT5G48070/AT2G22930/AT5G64740/AT1G65310/AT3G21780/AT4G03550/AT3G03050/AT4G30290/AT3G53150/AT3G07160/AT4G30270/AT4G15270/AT5G53990/AT2G36760/AT3G46690/AT5G16910/AT4G30280/AT2G36850/AT5G57550/AT5G59590/AT1G22400/AT1G22340/AT5G49690/AT3G23730/AT4G25810/AT4G27560/AT1G22360…
GO:0016042	lipid catabolic process	196	-0.403022	-1.54896	0.00560224	0.2101	2623	tags=22%, list=13%, signal=20%	AT1G74460/AT3G54950/AT1G53920/AT4G25770/AT2G05260/AT5G58700/AT3G47220/AT4G16760/AT5G22810/AT1G28660/AT3G51970/AT4G32810/AT2G30550/AT5G49900/AT3G21780/AT3G03520/AT1G31480/AT5G14450/AT1G29670/AT1G71120/AT5G24200/AT2G42010/AT2G31690/AT5G24230/AT2G03980/AT3G02040/AT1G71250/AT1G71691/AT1G53990/AT5G40990/AT5G41080/AT5G58690/AT4G17470/AT5G27520/AT1G02400/AT3G50400/AT4G37070/AT5G58670/AT5G55050/AT3G26420…
GO:0004629	phospholipase C activity	10	-0.804561	-1.75069	0.00560748	0.2101	2310	tags=50%, list=11%, signal=44%	AT3G47220/AT5G58690/AT5G58670/AT3G55940
GO:0042592	homeostatic process	494	0.319856	1.50345	0.00561798	0.2101	2284	tags=17%, list=11%, signal=15%	AT3G12030/AT4G15310/AT1G77110/AT1G76800/AT1G65670/AT5G52750/AT4G27260/AT1G68570/AT5G61350/AT2G01420/AT3G56980/AT5G45340/AT3G24450/AT4G37390/AT1G23080/AT2G01830/AT1G48130/AT3G61190/AT1G73590/AT2G37460/AT2G47160/AT5G52760/AT1G17460/AT4G16370/AT3G13730/AT2G28660/AT5G04150/AT5G57130/AT1G03120/AT3G53720/AT1G65970/AT1G47271/AT2G26710/AT1G42550/AT5G63530/AT4G34600/AT5G54510/AT4G33040/AT1G70940/AT5G59430…
GO:0005875	microtubule associated complex	87	0.480722	1.81643	0.00568182	0.2101	7220	tags=67%, list=36%, signal=43%	AT1G14380/AT5G23430/AT4G27595/AT3G10310/AT1G18410/AT1G21730/AT2G21300/AT1G19870/AT1G11160/AT5G47820/AT2G14825/AT4G26660/AT1G18840/AT3G20150/AT3G44050/AT5G54670/AT3G51150/AT3G49260/AT5G06670/AT3G16060/AT1G63640/AT1G61210/AT3G49650/AT2G02790/AT5G02370/AT2G22610/AT4G14330/AT5G40740/AT4G27180/AT5G33300/AT5G65930/AT1G18550/AT2G21380/AT3G44730/AT4G14150/AT3G19050/AT5G48520/AT4G21270/AT5G66310/AT3G45850…
GO:0009753	response to jasmonic acid	151	-0.442654	-1.65951	0.00570613	0.2101	2799	tags=30%, list=14%, signal=26%	AT3G03760/AT4G38620/AT1G21910/AT5G27380/AT2G36890/AT4G34710/AT3G50480/AT5G52660/AT2G34600/AT1G19570/AT5G42650/AT2G39770/AT2G32800/AT5G07010/AT4G20860/AT4G23600/AT5G40350/AT3G15356/AT5G59090/AT4G33720/AT3G45140/AT4G34990/AT3G51450/AT5G59780/AT1G49950/AT2G34700/AT1G74950/AT1G70700/AT1G72450/AT3G06490/AT1G54260/AT5G44420/AT5G13220/AT5G60890/AT1G44350/AT3G44860/AT2G39030/AT3G09940/AT5G67480/AT2G24850…
GO:0044282	small molecule catabolic process	162	-0.425313	-1.60499	0.00571429	0.2101	4278	tags=23%, list=21%, signal=18%	AT4G04880/AT1G65520/AT3G16170/AT2G02390/AT3G48990/AT2G16500/AT2G36310/AT1G76150/AT2G37040/AT1G79440/AT4G26910/AT5G55070/AT1G17290/AT1G19630/AT2G03800/AT2G22330/AT5G43430/AT4G34710/AT3G55440/AT4G16760/AT2G43430/AT3G53260/AT2G20340/AT5G24530/AT4G18010/AT3G21780/AT4G10500/AT3G55840/AT1G14520/AT5G27520/AT1G02400/AT4G10490/AT3G30775/AT5G38710/AT2G19800/AT2G19570
GO:0030003	cellular cation homeostasis	116	0.448614	1.77904	0.00588235	0.2101	2173	tags=19%, list=11%, signal=17%	AT3G12030/AT1G76800/AT5G52750/AT3G24450/AT2G47160/AT5G52760/AT4G16370/AT2G28660/AT3G53720/AT5G63530/AT2G38170/AT1G74810/AT3G06130/AT1G15460/AT5G26690/AT5G52740/AT3G14070/AT3G51860/AT1G23000/AT5G27150/AT5G14870/AT1G21140
GO:0003002	regionalization	105	0.452624	1.74969	0.00593472	0.2101	3222	tags=35%, list=16%, signal=30%	AT2G32010/AT4G17220/AT3G54720/AT1G70510/AT2G01950/AT2G31160/AT1G05470/AT1G73590/AT3G09160/AT5G10250/AT1G16510/AT5G01170/AT1G78120/AT1G04550/AT2G21050/AT2G31650/AT4G31400/AT2G17820/AT1G75820/AT4G08150/AT3G22810/AT2G41370/AT1G80180/AT1G31770/AT5G02030/AT3G09070/AT5G43870/AT4G32780/AT1G11130/AT5G20240/AT4G36890/AT5G46700/AT4G14740/AT5G51730/AT5G60690/AT5G49660/AT1G19850
GO:0016757	transferase activity, transferring glycosyl groups	472	-0.332522	-1.38048	0.00600962	0.2101	3517	tags=24%, list=17%, signal=20%	AT1G70090/AT4G26510/AT5G17990/AT2G37585/AT1G38065/AT3G53160/AT3G45400/AT1G55740/AT5G62220/AT3G46660/AT5G09870/AT3G02250/AT1G27200/AT5G05170/AT5G49190/AT3G62720/AT3G15350/AT2G39445/AT4G13410/AT4G07960/AT5G12890/AT4G01750/AT2G01850/AT2G29750/AT3G25140/AT3G07020/AT2G15490/AT3G54020/AT3G28180/AT1G20550/AT1G56550/AT2G25540/AT1G02720/AT1G76270/AT1G07240/AT1G52630/AT5G47780/AT4G03210/AT2G32450/AT1G32170…
GO:0009888	tissue development	126	0.43694	1.74259	0.00606061	0.2101	3710	tags=39%, list=18%, signal=32%	AT5G53210/AT1G46480/AT4G37810/AT3G54720/AT2G35230/AT5G61480/AT5G64530/AT1G05470/AT1G21590/AT2G30370/AT1G20700/AT5G10250/AT5G01170/AT4G32880/AT1G65380/AT3G49240/AT3G21710/AT1G69270/AT2G27230/AT2G41510/AT4G08150/AT3G22810/AT4G02010/AT4G13195/AT2G28250/AT5G23080/AT5G02030/AT1G27320/AT1G64625/AT3G09070/AT5G43870/AT4G32780/AT5G19530/AT1G80370/AT4G14740/AT2G34260/AT5G60690/AT5G50820/AT5G46780/AT1G62990…
GO:0055065	metal ion homeostasis	138	0.425922	1.72763	0.00634921	0.2101	2240	tags=22%, list=11%, signal=20%	AT3G12030/AT1G76800/AT5G52750/AT3G56980/AT3G24450/AT5G52760/AT4G16370/AT2G28660/AT5G04150/AT3G53720/AT5G63530/AT4G34600/AT2G38170/AT5G24380/AT3G06130/AT1G32450/AT2G41240/AT5G26690/AT3G47640/AT5G13740/AT5G52740/AT3G02850/AT3G51860/AT1G23000/AT5G27150/AT2G19110/AT5G14870/AT5G53550/AT1G21140/AT1G60960/AT1G58340
GO:0004364	glutathione transferase activity	55	-0.546896	-1.73717	0.00638978	0.2101	4835	tags=53%, list=24%, signal=40%	AT5G44000/AT3G55040/AT5G41220/AT1G17170/AT2G02930/AT5G02790/AT2G02390/AT1G02920/AT1G78370/AT1G49860/AT1G17190/AT1G02930/AT4G02520/AT2G47730/AT5G62480/AT2G30870/AT2G29420/AT3G62760/AT1G19570/AT2G29470/AT3G09270/AT2G29490/AT2G29460/AT1G69930/AT1G10370/AT1G69920/AT2G29450/AT2G29440
GO:0016229	steroid dehydrogenase activity	10	0.771834	1.82936	0.00642398	0.2101	547	tags=30%, list=3%, signal=29%	AT5G50600/AT5G50700/AT5G14700
GO:0032973	amino acid export across plasma membrane	10	0.763116	1.8087	0.00642398	0.2101	2237	tags=60%, list=11%, signal=53%	AT2G37460/AT1G01070/AT4G01430/AT4G08290/AT2G37450/AT4G08300
GO:0006749	glutathione metabolic process	60	-0.537395	-1.7303	0.00646204	0.2101	4840	tags=52%, list=24%, signal=39%	AT1G10360/AT3G55040/AT5G41220/AT1G17170/AT2G02930/AT5G02790/AT1G02920/AT4G23100/AT1G78370/AT1G44790/AT1G49860/AT1G17190/AT1G02930/AT5G27380/AT4G02520/AT2G47730/AT5G62480/AT2G30870/AT2G29420/AT3G62760/AT1G19570/AT2G29470/AT3G09270/AT2G29490/AT2G29460/AT1G69930/AT1G10370/AT1G69920/AT2G29450/AT2G29440
GO:0008081	phosphoric diester hydrolase activity	49	-0.560701	-1.75506	0.00649351	0.2101	2623	tags=27%, list=13%, signal=23%	AT4G11830/AT5G58700/AT3G47220/AT2G42010/AT3G02040/AT5G41080/AT5G58690/AT4G36945/AT4G26690/AT5G58670/AT3G55940/AT4G29690
GO:0048646	anatomical structure formation involved in morphogenesis	141	0.403561	1.63499	0.00651466	0.2101	3460	tags=39%, list=17%, signal=33%	AT2G03090/AT3G18550/AT2G40610/AT3G24300/AT1G73870/AT5G61480/AT2G27990/AT2G31160/AT1G73590/AT1G21590/AT2G13680/AT4G28250/AT2G38120/AT1G15570/AT3G24420/AT1G26780/AT5G05690/AT2G39700/AT1G69500/AT3G55500/AT1G77690/AT2G37640/AT4G02010/AT3G59420/AT5G40260/AT2G20750/AT2G41370/AT1G28560/AT3G11980/AT5G59340/AT1G68540/AT2G18480/AT5G02030/AT5G63090/AT3G14067/AT1G01280/AT2G37630/AT3G52430/AT4G38210/AT2G26170…
GO:0009119	ribonucleoside metabolic process	47	-0.552302	-1.71773	0.00653595	0.2101	2	tags=11%, list=0%, signal=11%	AT5G11160/AT3G17717/AT3G25570/AT2G19570
GO:0009407	toxin catabolic process	41	-0.571666	-1.72606	0.00676819	0.2101	4496	tags=59%, list=22%, signal=46%	AT1G17170/AT2G02930/AT2G02390/AT1G02920/AT1G78370/AT1G49860/AT1G17190/AT1G02930/AT4G02520/AT2G47730/AT5G62480/AT2G30870/AT2G29420/AT3G62760/AT2G29470/AT3G09270/AT2G29490/AT2G29460/AT1G69930/AT1G10370/AT1G69920/AT2G29450/AT2G29440
GO:0055074	calcium ion homeostasis	14	0.71574	1.81661	0.00681818	0.2101	1	tags=7%, list=0%, signal=7%	AT3G12030
GO:0055080	cation homeostasis	178	0.389651	1.63447	0.00687285	0.2101	2240	tags=20%, list=11%, signal=18%	AT3G12030/AT1G76800/AT5G52750/AT3G56980/AT3G24450/AT2G47160/AT5G52760/AT4G16370/AT2G28660/AT5G04150/AT3G53720/AT5G63530/AT4G34600/AT2G38170/AT5G24380/AT1G74810/AT3G06130/AT1G32450/AT2G41240/AT1G15460/AT5G26690/AT3G47640/AT5G13740/AT5G52740/AT3G14070/AT3G02850/AT3G51860/AT1G23000/AT5G27150/AT2G19110/AT5G14870/AT5G53550/AT1G21140/AT1G60960/AT1G58340
GO:2000652	regulation of secondary cell wall biogenesis	17	0.688532	1.81683	0.00691244	0.2101	3175	tags=59%, list=16%, signal=50%	AT4G33450/AT1G79180/AT5G16600/AT4G28500/AT1G17950/AT1G28470/AT5G12870/AT1G66810/AT5G49660/AT1G62990
GO:0005507	copper ion binding	183	-0.407329	-1.56549	0.00691563	0.2101	4017	tags=28%, list=20%, signal=23%	ATMG00160/AT2G19940/AT1G22840/AT1G02920/AT5G50370/AT4G38580/AT1G76100/AT5G13490/AT1G02410/AT1G79440/AT2G36880/AT5G19550/AT4G10040/AT5G61030/AT3G56240/AT4G39830/AT1G02930/AT5G21105/AT3G26460/AT4G13860/AT3G16430/AT3G09260/AT3G55440/AT2G04400/AT1G08830/AT2G30870/AT3G52300/AT5G51480/AT5G48100/AT4G22010/AT1G19570/AT2G27730/AT3G16420/AT1G31710/AT5G66920/AT2G01530/AT4G20260/AT4G31530/AT4G12420/AT1G20440…
GO:0016145	S-glycoside catabolic process	19	-0.678542	-1.74896	0.0069808	0.2101	2451	tags=53%, list=12%, signal=46%	AT2G43910/AT3G09260/AT3G60130/AT3G16410/AT2G44450/AT3G16400/AT1G51470/AT1G47600/AT3G44320
GO:0019759	glycosinolate catabolic process	19	-0.678542	-1.74896	0.0069808	0.2101	2451	tags=53%, list=12%, signal=46%	AT2G43910/AT3G09260/AT3G60130/AT3G16410/AT2G44450/AT3G16400/AT1G51470/AT1G47600/AT3G44320
GO:0019762	glucosinolate catabolic process	19	-0.678542	-1.74896	0.0069808	0.2101	2451	tags=53%, list=12%, signal=46%	AT2G43910/AT3G09260/AT3G60130/AT3G16410/AT2G44450/AT3G16400/AT1G51470/AT1G47600/AT3G44320
GO:0046873	metal ion transmembrane transporter activity	179	0.40146	1.68361	0.00699301	0.2101	2947	tags=25%, list=15%, signal=22%	AT3G12030/AT5G09400/AT1G76800/AT3G46900/AT1G05300/AT2G30080/AT5G59520/AT4G16370/AT2G37925/AT2G25600/AT1G27770/AT4G22200/AT4G35290/AT5G14880/AT2G29100/AT5G66650/AT2G38170/AT2G46440/AT1G10970/AT1G55910/AT1G05200/AT1G07430/AT2G26975/AT5G13740/AT3G14070/AT3G02850/AT3G51860/AT2G40540/AT5G27150/AT1G70300/AT2G19110/AT5G14870/AT1G21140/AT1G60960/AT3G51480/AT4G01840/AT1G31120/AT2G29110/AT1G19780/AT5G48400…
GO:0001944	vasculature development	23	0.626146	1.79064	0.0070922	0.2101	2009	tags=43%, list=10%, signal=39%	AT1G74930/AT5G61600/AT1G46480/AT5G61480/AT4G17490/AT4G11280/AT1G20700/AT5G47220/AT5G03280/AT1G28370
GO:0098771	inorganic ion homeostasis	190	0.361999	1.52878	0.0070922	0.2101	2240	tags=18%, list=11%, signal=17%	AT3G12030/AT1G76800/AT5G52750/AT3G56980/AT3G24450/AT2G47160/AT5G52760/AT4G16370/AT2G28660/AT5G04150/AT3G53720/AT5G63530/AT4G34600/AT2G38170/AT5G24380/AT1G74810/AT3G06130/AT1G32450/AT2G41240/AT1G15460/AT5G26690/AT3G47640/AT3G17790/AT5G13740/AT5G52740/AT3G02850/AT3G51860/AT1G23000/AT5G27150/AT2G19110/AT5G14870/AT5G53550/AT1G21140/AT1G60960/AT1G58340
GO:0009734	auxin-activated signaling pathway	181	0.388434	1.62618	0.00716846	0.2101	2934	tags=32%, list=14%, signal=28%	AT5G66350/AT3G09870/AT4G32280/AT1G56150/AT1G77110/AT2G34650/AT2G01420/AT5G40030/AT5G18020/AT2G01950/AT1G23080/AT5G18080/AT1G73590/AT3G62100/AT3G03850/AT1G16510/AT1G75520/AT5G18030/AT2G36910/AT5G54510/AT3G03840/AT1G31880/AT2G38120/AT1G70940/AT5G18050/AT1G78120/AT1G04550/AT5G60450/AT2G33310/AT5G49980/AT2G21050/AT3G16500/AT5G18010/AT1G75500/AT1G77690/AT3G22810/AT1G76530/AT3G12830/AT1G29510/AT3G27580…
GO:0030001	metal ion transport	181	0.378214	1.58339	0.00716846	0.2101	3108	tags=24%, list=15%, signal=20%	AT3G12030/AT5G09400/AT1G76800/AT5G52750/AT3G53530/AT3G24450/AT1G05300/AT2G30080/AT5G59520/AT5G52760/AT4G16370/AT2G28660/AT2G25090/AT3G53720/AT4G35290/AT2G29100/AT5G63530/AT2G38170/AT1G15520/AT1G55910/AT1G05200/AT3G06130/AT5G26690/AT5G52740/AT3G02850/AT1G23000/AT5G27150/AT2G29650/AT2G19110/AT1G21140/AT1G60960/AT3G51480/AT4G01840/AT2G29110/AT5G48400/AT3G11050/AT3G08040/AT4G35920/AT2G37390/AT1G71050…
GO:0016129	phytosteroid biosynthetic process	26	0.620153	1.81711	0.00721154	0.2101	1626	tags=27%, list=8%, signal=25%	AT4G15310/AT1G65670/AT5G45340/AT3G13730/AT5G05690/AT4G36380/AT4G15393
GO:0010075	regulation of meristem growth	34	0.556292	1.76283	0.00735294	0.210462	2260	tags=32%, list=11%, signal=29%	AT5G03150/AT3G54720/AT5G46260/AT1G03170/AT1G67710/AT3G06020/AT1G75820/AT5G13290/AT4G20270/AT5G46270/AT3G15150
GO:0010252	auxin homeostasis	34	0.545476	1.72856	0.00735294	0.210462	951	tags=24%, list=5%, signal=22%	AT1G77110/AT4G27260/AT2G01420/AT4G37390/AT1G23080/AT1G73590/AT5G54510/AT1G70940
GO:0050801	ion homeostasis	225	0.358051	1.53974	0.00754717	0.214143	2240	tags=20%, list=11%, signal=18%	AT3G12030/AT1G76800/AT5G52750/AT1G68570/AT3G56980/AT3G24450/AT2G37460/AT2G47160/AT5G52760/AT4G16370/AT2G28660/AT5G04150/AT1G03120/AT3G53720/AT1G42550/AT5G63530/AT4G34600/AT2G38170/AT5G24380/AT1G74810/AT3G06130/AT1G32450/AT2G41240/AT1G15460/AT5G26690/AT3G47640/AT3G17790/AT4G33000/AT4G08290/AT5G13740/AT5G52740/AT3G14070/AT3G02850/AT3G51860/AT1G23000/AT5G27150/AT2G37450/AT2G19110/AT5G14870/AT5G53550…
GO:0046915	transition metal ion transmembrane transporter activity	47	0.510489	1.72196	0.00769231	0.216379	2181	tags=28%, list=11%, signal=25%	AT1G76800/AT3G46900/AT1G05300/AT2G30080/AT4G16370/AT2G37925/AT1G10970/AT1G55910/AT2G26975/AT3G14070/AT2G19110/AT1G21140/AT1G60960
GO:0045786	negative regulation of cell cycle	48	0.490356	1.66833	0.00777202	0.216753	3875	tags=38%, list=19%, signal=30%	AT3G01600/AT1G29770/AT3G50630/AT1G13448/AT1G20720/AT1G69400/AT3G18524/AT3G15150/AT1G49910/AT2G32710/AT4G30870/AT2G23430/AT5G48820/AT3G25100/AT2G18290/AT4G37650/AT1G80210/AT1G02970
GO:0034220	ion transmembrane transport	235	0.325285	1.39952	0.008	0.22122	2237	tags=14%, list=11%, signal=12%	AT3G12030/AT4G38250/AT1G17810/AT1G76800/AT4G24570/AT1G73190/AT1G05300/AT2G30080/AT1G25530/AT3G28960/AT2G37460/AT1G01070/AT1G64780/AT2G38120/AT5G23810/AT4G01430/AT1G55910/ATCG00530/AT2G21050/AT1G80660/AT5G33280/AT1G74810/AT1G77690/AT1G77990/AT4G08290/AT5G46110/AT4G26180/AT5G27150/AT3G54830/AT2G37450/AT1G21140/AT4G08300
GO:0009832	plant-type cell wall biogenesis	75	0.438357	1.62031	0.00815217	0.221792	3610	tags=41%, list=18%, signal=34%	AT4G33450/AT4G17220/AT1G32770/AT3G61910/AT5G15630/AT2G46770/AT1G17950/AT2G21770/AT5G44030/AT1G75500/AT2G32530/AT2G40320/AT2G36570/AT2G38080/AT4G18780/AT1G55850/AT4G23990/AT5G12870/AT4G24000/AT2G15440/AT4G36890/AT5G17420/AT3G50220/AT5G47820/AT1G22620/AT2G32540/AT1G27440/AT5G60490/AT5G03170/AT5G46340/AT1G74420
GO:0016671	oxidoreductase activity, acting on a sulfur group of donors, disulfide as acceptor	51	-0.535959	-1.67445	0.00815661	0.221792	2536	tags=29%, list=12%, signal=26%	AT4G21990/AT4G04610/AT1G31020/AT1G59730/AT1G76080/AT5G07460/AT4G29670/AT3G53220/AT1G62180/AT1G45145/AT4G21840/AT4G21850/AT4G04840/AT4G21830
GO:1901361	organic cyclic compound catabolic process	201	-0.388849	-1.49991	0.0083682	0.225665	2614	tags=13%, list=13%, signal=12%	AT5G43430/AT2G32550/AT3G09260/AT3G17810/AT4G21600/AT3G51970/AT3G53260/AT2G20340/AT5G48100/AT5G24530/AT4G03110/AT4G10500/AT3G55840/AT2G32070/AT1G19670/AT4G27650/AT1G68760/AT4G10490/AT3G30775/AT5G01040/AT5G61780/AT1G77680/AT5G38710/AT1G03457/AT5G01050/AT2G19570
GO:0023014	signal transduction by protein phosphorylation	33	-0.588225	-1.71116	0.00856164	0.226881	4285	tags=45%, list=21%, signal=36%	AT4G36950/AT2G26000/AT4G08500/AT1G08720/AT1G05100/AT5G18610/AT3G07980/AT1G53570/AT3G13530/AT1G07150/AT5G67080/AT4G26890/AT2G32510/AT5G55090
GO:0032147	activation of protein kinase activity	32	-0.592591	-1.71649	0.00856164	0.226881	1726	tags=25%, list=8%, signal=23%	AT1G53570/AT3G13530/AT1G07150/AT5G67080/AT4G26890/AT2G32510/AT5G55090
GO:0048609	multicellular organismal reproductive process	93	0.412583	1.57442	0.00864553	0.226881	3673	tags=31%, list=18%, signal=26%	AT3G63210/AT4G28520/AT1G03890/AT5G44120/AT1G32770/AT1G48130/AT1G03880/AT2G41850/AT3G22550/AT2G46770/AT4G31400/AT1G07430/AT2G17820/AT3G54390/AT5G05550/AT3G44750/AT3G11100/AT1G55250/AT2G44950/AT3G57510/AT2G27840/AT1G48270/AT3G50990/AT3G07970/AT1G72520/AT5G67110/AT4G17483/AT5G11580/AT5G23660
GO:0005253	anion channel activity	19	-0.650751	-1.67732	0.008726	0.226881	1646	tags=26%, list=8%, signal=24%	AT5G40890/AT4G27970/AT3G27170/AT5G24030
GO:0035303	regulation of dephosphorylation	18	-0.671997	-1.70348	0.00888099	0.226881	2787	tags=39%, list=14%, signal=34%	AT5G47790/AT4G08960/AT4G17870/AT5G52200/AT2G31305/AT5G46790
GO:0098662	inorganic cation transmembrane transport	114	0.40669	1.60008	0.00892857	0.226881	1252	tags=6%, list=6%, signal=6%	AT3G12030/AT1G76800/AT1G05300/AT2G30080/AT1G55910/ATCG00530/AT1G80660
GO:0098655	cation transmembrane transport	121	0.40109	1.59646	0.00903615	0.226881	1252	tags=7%, list=6%, signal=6%	AT3G12030/AT1G76800/AT1G05300/AT2G30080/AT1G64780/AT1G55910/ATCG00530/AT1G80660
GO:0010337	regulation of salicylic acid metabolic process	12	0.718923	1.76648	0.0090703	0.226881	3401	tags=58%, list=17%, signal=49%	AT5G26920/AT2G41010/AT1G05850/AT1G73805/AT3G56880/AT3G52430/AT1G53130
GO:0140115	export across plasma membrane	12	0.740464	1.81941	0.0090703	0.226881	2237	tags=50%, list=11%, signal=45%	AT2G37460/AT1G01070/AT4G01430/AT4G08290/AT2G37450/AT4G08300
GO:0016810	hydrolase activity, acting on carbon-nitrogen (but not peptide) bonds	93	-0.467254	-1.63796	0.00916031	0.226881	763	tags=4%, list=4%, signal=4%	AT3G44320/AT1G44350/AT2G19570
GO:0006873	cellular ion homeostasis	127	0.405372	1.61497	0.00925926	0.226881	2173	tags=19%, list=11%, signal=17%	AT3G12030/AT1G76800/AT5G52750/AT3G24450/AT2G47160/AT5G52760/AT4G16370/AT2G28660/AT1G03120/AT3G53720/AT5G63530/AT2G38170/AT1G74810/AT3G06130/AT1G15460/AT5G26690/AT3G17790/AT5G52740/AT3G14070/AT3G51860/AT1G23000/AT5G27150/AT5G14870/AT1G21140
GO:0016298	lipase activity	85	-0.470961	-1.62408	0.00930233	0.226881	3462	tags=33%, list=17%, signal=27%	AT3G26430/AT2G39410/AT3G16785/AT4G22305/AT4G11830/AT3G54950/AT1G53920/AT4G25770/AT5G58700/AT3G47220/AT2G30550/AT1G77420/AT1G31480/AT1G71120/AT2G42010/AT2G31690/AT1G71250/AT1G53990/AT5G40990/AT5G58690/AT4G37070/AT5G58670/AT5G55050/AT3G26420/AT3G55940/AT1G05800/AT2G44810
GO:0010305	leaf vascular tissue pattern formation	33	0.53926	1.70348	0.00956938	0.226881	3222	tags=45%, list=16%, signal=38%	AT2G32010/AT3G54720/AT2G01950/AT1G05470/AT3G09160/AT5G10250/AT1G78120/AT3G22810/AT5G43870/AT4G32780/AT1G11130/AT5G46700/AT4G14740/AT5G51730/AT1G19850
GO:0031056	regulation of histone modification	33	0.529659	1.67315	0.00956938	0.226881	5596	tags=48%, list=28%, signal=35%	AT5G11470/AT3G24140/AT4G04180/AT1G54440/AT1G04020/AT4G39100/AT3G48430/AT1G14350/AT1G77300/AT4G18470/AT2G23740/AT5G28390/AT4G30200/AT5G37055/AT3G44600/AT2G16390
GO:0004620	phospholipase activity	56	-0.518059	-1.65267	0.00961539	0.226881	3462	tags=34%, list=17%, signal=28%	AT2G39410/AT3G16785/AT4G22305/AT4G11830/AT3G54950/AT5G58700/AT3G47220/AT2G30550/AT1G77420/AT1G31480/AT2G42010/AT2G31690/AT5G58690/AT4G37070/AT5G58670/AT3G55940/AT1G05800/AT2G44810
GO:0046364	monosaccharide biosynthetic process	48	-0.530925	-1.65846	0.00974026	0.226881	4278	tags=35%, list=21%, signal=28%	AT5G42740/AT5G28840/AT5G03690/AT3G54050/AT4G30440/AT2G46750/AT3G55440/AT1G78050/AT2G39770/AT3G23820/AT5G65690/AT1G14520/AT5G15650/AT2G20370/AT2G46740/AT2G19800
GO:0009640	photomorphogenesis	38	0.514722	1.67946	0.0097561	0.226881	1982	tags=29%, list=10%, signal=26%	AT3G21150/AT5G39860/AT3G54720/AT1G74660/AT1G73590/AT2G36910/AT5G48150/AT3G24420/AT1G20900/AT5G15160/AT5G54190
GO:0019827	stem cell population maintenance	38	0.519752	1.69587	0.0097561	0.226881	2945	tags=39%, list=14%, signal=34%	AT1G69440/AT5G43810/AT2G27990/AT2G31160/AT2G35350/AT4G37750/AT5G61850/AT2G27230/AT2G03710/AT1G04020/AT2G46920/AT5G48160/AT5G02030/AT2G17950/AT5G44280
GO:0098727	maintenance of cell number	38	0.519752	1.69587	0.0097561	0.226881	2945	tags=39%, list=14%, signal=34%	AT1G69440/AT5G43810/AT2G27990/AT2G31160/AT2G35350/AT4G37750/AT5G61850/AT2G27230/AT2G03710/AT1G04020/AT2G46920/AT5G48160/AT5G02030/AT2G17950/AT5G44280
GO:0055082	cellular chemical homeostasis	142	0.384513	1.56223	0.00980392	0.226881	2173	tags=18%, list=11%, signal=16%	AT3G12030/AT1G76800/AT5G52750/AT5G61350/AT3G24450/AT2G47160/AT5G52760/AT4G16370/AT2G28660/AT1G03120/AT3G53720/AT5G63530/AT2G38170/AT1G74810/AT3G06130/AT1G15460/AT5G26690/AT3G17790/AT5G52740/AT3G14070/AT3G51860/AT1G23000/AT5G27150/AT5G14870/AT1G21140
GO:0031098	stress-activated protein kinase signaling cascade	35	-0.582929	-1.70572	0.0102215	0.230738	1726	tags=23%, list=8%, signal=21%	AT1G53570/AT3G13530/AT1G07150/AT5G67080/AT4G26890/AT2G32510/AT5G55090
GO:0009926	auxin polar transport	51	0.484239	1.68192	0.0102828	0.230738	3344	tags=39%, list=16%, signal=33%	AT1G77110/AT2G34650/AT2G01420/AT5G40030/AT1G23080/AT1G73590/AT2G36910/AT2G38120/AT1G70940/AT1G77690/AT1G29510/AT3G27580/AT1G28560/AT5G03280/AT1G02520/AT2G26170/AT5G19530/AT3G28860/AT1G13980/AT1G14350
GO:0009060	aerobic respiration	22	-0.619238	-1.6551	0.0103986	0.230738	5078	tags=55%, list=25%, signal=41%	AT3G02090/AT4G37830/AT4G28070/AT1G22840/AT1G52710/AT3G27380/AT5G40650/AT4G10040/AT4G30490/AT5G51060/AT5G25450
GO:0034062	5'-3' RNA polymerase activity	52	0.458033	1.58445	0.0105541	0.230738	7695	tags=54%, list=38%, signal=34%	AT4G14520/AT2G15400/AT1G68990/AT5G15700/AT1G63020/AT2G41340/AT3G53920/AT2G24120/AT4G11130/AT3G57080/AT1G14790/AT1G06790/AT3G57660/AT3G25940/AT5G67100/AT2G19910/AT3G23780/AT5G41880/AT5G52800/AT1G01210/AT2G19920/AT5G60040/AT2G19930/AT1G67320/AT4G21710/AT1G29940/AT4G35800/AT2G40030
GO:0097747	RNA polymerase activity	52	0.458033	1.58445	0.0105541	0.230738	7695	tags=54%, list=38%, signal=34%	AT4G14520/AT2G15400/AT1G68990/AT5G15700/AT1G63020/AT2G41340/AT3G53920/AT2G24120/AT4G11130/AT3G57080/AT1G14790/AT1G06790/AT3G57660/AT3G25940/AT5G67100/AT2G19910/AT3G23780/AT5G41880/AT5G52800/AT1G01210/AT2G19920/AT5G60040/AT2G19930/AT1G67320/AT4G21710/AT1G29940/AT4G35800/AT2G40030
GO:0005261	cation channel activity	65	0.463482	1.66332	0.0106952	0.230738	2947	tags=32%, list=15%, signal=28%	AT3G12030/AT2G25600/AT1G27770/AT4G22200/AT4G35290/AT2G29100/AT5G66650/AT2G46440/AT2G48060/AT1G05200/AT1G07430/AT3G02850/AT5G14870/AT3G51480/AT4G01840/AT2G29110/AT1G19780/AT5G48400/AT5G46240/AT5G54250/AT4G35920
GO:0010921	regulation of phosphatase activity	12	-0.73455	-1.69282	0.0106952	0.230738	2637	tags=42%, list=13%, signal=36%	AT4G17870/AT5G52200/AT2G31305/AT5G46790
GO:0031306	intrinsic component of mitochondrial outer membrane	12	-0.733629	-1.69069	0.0106952	0.230738	2572	tags=42%, list=13%, signal=36%	AT1G04070/AT3G20040/AT1G06530/AT1G50460
GO:0031307	integral component of mitochondrial outer membrane	12	-0.733629	-1.69069	0.0106952	0.230738	2572	tags=42%, list=13%, signal=36%	AT1G04070/AT3G20040/AT1G06530/AT1G50460
GO:0009691	cytokinin biosynthetic process	15	-0.698919	-1.6975	0.0107143	0.230738	3437	tags=53%, list=17%, signal=44%	AT3G53450/AT2G27760/AT1G25410/AT3G63110/AT1G68460/AT5G06300/AT5G52400
GO:0009914	hormone transport	68	0.456181	1.65044	0.0108108	0.230738	3344	tags=38%, list=16%, signal=32%	AT1G77110/AT2G34650/AT2G01420/AT5G40030/AT1G23080/AT1G73590/AT1G16510/AT2G36910/AT2G38120/AT1G70940/AT1G19770/AT1G75500/AT1G77690/AT1G29510/AT3G27580/AT1G28560/AT5G03280/AT1G54200/AT1G02520/AT2G26170/AT1G28230/AT5G19530/AT1G22220/AT3G28860/AT1G13980/AT1G14350
GO:0042744	hydrogen peroxide catabolic process	70	-0.498224	-1.65578	0.0108192	0.230738	2363	tags=30%, list=12%, signal=27%	AT3G49120/AT3G01190/AT4G11290/AT1G05240/AT1G68850/AT3G03670/AT5G19880/AT1G07890/AT5G14130/AT5G05340/AT5G64100/AT5G06720/AT5G17820/AT3G28200/AT1G30870/AT1G05250/AT5G39580/AT4G26010/AT4G37530/AT1G14550
GO:0042743	hydrogen peroxide metabolic process	77	-0.481607	-1.62379	0.0109204	0.231386	2363	tags=27%, list=12%, signal=24%	AT3G49120/AT3G01190/AT4G11290/AT1G05240/AT1G68850/AT3G03670/AT5G19880/AT1G07890/AT5G14130/AT5G05340/AT5G64100/AT5G06720/AT5G17820/AT3G28200/AT1G30870/AT1G05250/AT5G39580/AT4G26010/AT4G37530/AT1G14550
GO:0042445	hormone metabolic process	186	-0.386985	-1.48728	0.0111266	0.234232	3505	tags=31%, list=17%, signal=26%	AT1G16400/AT3G23630/AT2G19590/AT3G53450/AT1G01480/AT2G45400/AT1G68320/AT4G26200/AT4G31500/AT1G05010/AT1G16410/AT1G19630/AT3G59060/AT4G15400/AT2G22330/AT4G16760/AT4G29740/AT2G27760/AT4G28410/AT4G32810/AT1G18870/AT1G19640/AT5G24530/AT5G07200/AT5G42650/AT1G25410/AT5G07010/AT3G25780/AT4G10500/AT3G47190/AT5G58660/AT4G39030/AT3G63440/AT5G43890/AT3G45140/AT1G75450/AT3G63110/AT5G27520/AT3G48520/AT2G06050…
GO:0010588	cotyledon vascular tissue pattern formation	14	0.684474	1.73726	0.0113636	0.236175	2909	tags=57%, list=14%, signal=49%	AT1G05470/AT3G09160/AT5G10250/AT5G01170/AT2G21050/AT1G31770/AT3G09070/AT5G51730
GO:0045168	cell-cell signaling involved in cell fate commitment	14	0.684226	1.73663	0.0113636	0.236175	565	tags=14%, list=3%, signal=14%	AT2G01505/AT5G59305
GO:0010431	seed maturation	28	0.556513	1.67324	0.0116822	0.239743	1974	tags=29%, list=10%, signal=26%	AT4G28520/AT1G03890/AT5G44120/AT1G03880/AT2G17820/AT3G54390/AT5G05550/AT3G11100
GO:1903338	regulation of cell wall organization or biogenesis	28	0.571612	1.71864	0.0116822	0.239743	4838	tags=50%, list=24%, signal=38%	AT4G33450/AT1G79180/AT5G16600/AT4G28500/AT1G17950/AT1G28470/AT4G04920/AT5G12870/AT1G66810/AT5G49660/AT1G62990/AT3G16060/AT1G62700/AT3G08550
GO:0004857	enzyme inhibitor activity	129	-0.438747	-1.61554	0.0118519	0.241704	2787	tags=30%, list=14%, signal=26%	AT5G47550/AT5G47790/AT5G43580/AT1G11580/AT2G26440/AT4G17870/AT5G64640/AT2G38870/AT1G53840/AT2G28330/AT5G52200/AT2G31305/AT4G01026/AT5G20860/AT4G15980/AT3G10525/AT5G64620/AT4G02320/AT1G53830/AT4G02330/AT5G06870/AT1G23200/AT3G19150/AT3G49220/AT2G26390/AT2G43510/AT2G43520/AT1G73260/AT2G40330/AT3G47380/AT5G62350/AT4G25260/AT2G47550/AT2G38310/AT5G05440/AT4G16500/AT5G62360/AT5G46790
GO:0072507	divalent inorganic cation homeostasis	26	0.590276	1.72956	0.0120192	0.243595	2147	tags=23%, list=11%, signal=21%	AT3G12030/AT2G38170/AT5G13740/AT3G51860/AT2G19110/AT5G14870
GO:0072527	pyrimidine-containing compound metabolic process	78	-0.472714	-1.59531	0.0125	0.251775	2	tags=9%, list=0%, signal=9%	AT1G06520/AT3G17810/AT3G11430/AT5G59490/AT2G32150/AT2G19570
GO:0016209	antioxidant activity	153	-0.396882	-1.49291	0.0127479	0.255192	2536	tags=21%, list=12%, signal=18%	AT1G76080/AT4G02520/AT5G66390/AT3G49120/AT3G63080/AT3G01190/AT2G47730/AT4G11290/AT1G08830/AT1G05240/AT1G68850/AT3G03670/AT5G19880/AT1G19570/AT1G07890/AT3G53220/AT5G14130/AT5G05340/AT1G45145/AT5G07390/AT5G64100/AT5G06720/AT5G17820/AT3G28200/AT5G51060/AT1G30870/AT1G05250/AT5G39580/AT4G26010/AT4G37530/AT1G14550
GO:0090558	plant epidermis development	10	0.741576	1.75765	0.012848	0.255628	4151	tags=70%, list=20%, signal=56%	AT5G53210/AT4G37810/AT2G30370/AT1G80370/AT5G10310/AT2G18790/AT4G12970
GO:0031227	intrinsic component of endoplasmic reticulum membrane	60	0.451917	1.61063	0.0130548	0.257286	1387	tags=10%, list=7%, signal=9%	AT3G12030/AT4G14390/AT5G50650/AT4G14400/AT4G03450/AT4G03500
GO:0060918	auxin transport	61	0.448152	1.59533	0.013089	0.257286	3344	tags=38%, list=16%, signal=32%	AT1G77110/AT2G34650/AT2G01420/AT5G40030/AT1G23080/AT1G73590/AT1G16510/AT2G36910/AT2G38120/AT1G70940/AT1G75500/AT1G77690/AT1G29510/AT3G27580/AT1G28560/AT5G03280/AT1G54200/AT1G02520/AT2G26170/AT5G19530/AT3G28860/AT1G13980/AT1G14350
GO:0009636	response to toxic substance	128	-0.437512	-1.61118	0.0132159	0.258224	4813	tags=40%, list=24%, signal=31%	AT2G47630/AT4G15955/AT3G55040/AT5G11650/AT4G37610/AT4G02340/AT2G47180/AT5G02790/ATCG00020/AT2G32700/AT3G47860/AT1G18150/AT3G05600/AT4G27940/AT3G20390/AT4G32551/AT2G39410/AT2G26740/AT1G17190/AT3G59410/AT5G05410/AT1G34190/AT2G46320/AT1G16420/AT2G15490/AT1G08650/AT5G63160/AT5G58070/AT2G43570/AT2G29500/AT2G26150/AT1G77420/AT4G23600/AT5G46350/AT4G12400/AT5G24810/AT1G54050/AT1G12110/AT1G45145/AT5G35750…
GO:0048731	system development	287	0.316546	1.40207	0.0134529	0.260503	3558	tags=24%, list=18%, signal=20%	AT2G01505/AT1G74930/AT3G10590/AT5G61600/AT2G17040/AT1G46480/AT3G54720/AT5G51870/AT5G61480/AT2G27990/AT4G17490/AT4G12750/AT1G69490/AT5G64530/AT1G73590/AT1G67260/AT4G11280/AT3G09160/AT1G20700/AT5G10250/AT5G64770/AT5G01170/AT1G02730/AT4G37750/AT3G45640/AT5G61850/AT5G23320/AT5G01200/AT5G51810/AT1G20900/AT3G10870/AT4G24860/AT5G47220/AT2G40080/AT4G31610/AT4G31160/AT5G44180/AT5G03280/AT1G28370/AT4G39100…
GO:0072593	reactive oxygen species metabolic process	106	-0.445528	-1.59379	0.0135542	0.260503	2363	tags=23%, list=12%, signal=20%	AT3G49120/AT3G01190/AT4G11290/AT1G05240/AT1G68850/AT5G62520/AT3G03670/AT5G19880/AT1G07890/AT5G14130/AT1G64110/AT5G05340/AT5G64100/AT5G06720/AT5G17820/AT3G28200/AT1G30870/AT1G05250/AT5G39580/AT4G26010/AT4G37530/AT5G52882/AT1G14550
GO:0010065	primary meristem tissue development	14	0.671488	1.7043	0.0136364	0.260503	1637	tags=50%, list=8%, signal=46%	AT1G46480/AT5G61480/AT1G05470/AT1G21590/AT4G32880/AT4G02010/AT4G13195
GO:0030148	sphingolipid biosynthetic process	26	-0.605627	-1.68556	0.0136519	0.260503	3967	tags=50%, list=20%, signal=40%	AT4G22330/AT1G69640/AT3G06060/AT3G61580/AT3G54020/AT1G13580/AT3G48780/AT1G14290/AT3G48790/AT4G36830/AT1G26200/AT2G46210
GO:0042737	drug catabolic process	195	-0.374036	-1.4374	0.013947	0.264125	2773	tags=26%, list=14%, signal=23%	AT3G27400/AT1G11580/AT4G01700/AT2G26440/AT5G64640/AT3G17810/AT1G02360/AT5G66390/AT3G49120/AT3G01190/AT3G59050/AT4G11290/AT1G53840/AT4G19720/AT3G53260/AT2G43570/AT2G20340/AT1G05240/AT1G68850/AT5G04310/AT5G20860/AT3G03670/AT5G24530/AT5G19880/AT1G07890/AT4G15980/AT4G19820/AT4G10500/AT5G14130/AT4G02320/AT1G53830/AT4G02330/AT1G23200/AT5G05340/AT2G43610/AT3G49220/AT2G43620/AT4G19810/AT5G64100/AT5G06720…
GO:0016758	transferase activity, transferring hexosyl groups	317	-0.343202	-1.381	0.0140665	0.264125	2760	tags=24%, list=14%, signal=21%	AT1G70090/AT2G37585/AT3G53160/AT1G55740/AT5G62220/AT3G46660/AT5G09870/AT5G05170/AT5G49190/AT3G62720/AT3G15350/AT2G39445/AT5G12890/AT2G01850/AT2G29750/AT3G25140/AT3G07020/AT2G15490/AT3G54020/AT2G25540/AT1G02720/AT1G07240/AT5G47780/AT4G03210/AT1G32170/AT3G55710/AT4G14130/AT4G15280/AT2G06850/AT2G35650/AT1G24170/AT4G27480/AT2G29730/AT5G48070/AT2G22930/AT5G64740/AT1G65310/AT3G21780/AT1G74380/AT4G03550…
GO:0008308	voltage-gated anion channel activity	17	-0.656425	-1.64457	0.0140845	0.264125	1604	tags=24%, list=8%, signal=22%	AT4G27970/AT3G27170/AT5G24030
GO:0010074	maintenance of meristem identity	32	0.531964	1.66568	0.0143541	0.266532	2063	tags=38%, list=10%, signal=34%	AT1G69440/AT2G27990/AT2G31160/AT2G35350/AT4G37750/AT5G61850/AT2G27230/AT2G03710/AT1G04020/AT2G46920/AT5G48160/AT5G02030
GO:0022611	dormancy process	26	0.574592	1.68361	0.0144231	0.266532	4800	tags=50%, list=24%, signal=38%	AT3G63210/AT1G48130/AT3G22550/AT1G07430/AT3G44750/AT1G55250/AT2G44950/AT2G27840/AT1G48270/AT1G52920/AT5G20700/AT1G22160/AT3G06010
GO:0036293	response to decreased oxygen levels	59	-0.506523	-1.62826	0.0144695	0.266532	4717	tags=47%, list=23%, signal=37%	AT1G04700/AT3G20770/AT1G05880/AT5G25250/AT4G32690/AT2G32700/AT5G57610/AT4G31970/AT5G27630/AT4G32551/AT1G19250/AT2G47520/AT1G17290/AT5G49190/AT5G63790/AT2G43430/AT3G03670/AT1G35140/AT5G54960/AT2G26150/AT1G53910/AT3G14230/AT5G39890/AT5G15120/AT4G33070/AT4G37710/AT1G14550
GO:0070482	response to oxygen levels	60	-0.501892	-1.61599	0.0145396	0.266532	4717	tags=47%, list=23%, signal=36%	AT1G04700/AT3G20770/AT1G05880/AT5G25250/AT4G32690/AT2G32700/AT5G57610/AT4G31970/AT5G27630/AT4G32551/AT1G19250/AT2G47520/AT1G17290/AT5G49190/AT5G63790/AT2G43430/AT3G03670/AT1G35140/AT5G54960/AT2G26150/AT1G53910/AT3G14230/AT5G39890/AT5G15120/AT4G33070/AT4G37710/AT1G14550
GO:0102483	scopolin beta-glucosidase activity	39	-0.543366	-1.62583	0.0151261	0.275734	3720	tags=38%, list=18%, signal=31%	AT1G60260/AT1G61820/AT4G21760/AT3G09260/AT3G60130/AT1G66270/AT2G44470/AT2G44450/AT1G51470/AT1G66280/AT1G47600/AT3G60120/AT1G60270/AT5G28510
GO:0098660	inorganic ion transmembrane transport	125	0.360188	1.43531	0.0152439	0.276338	1268	tags=7%, list=6%, signal=7%	AT3G12030/AT1G76800/AT4G24570/AT1G05300/AT2G30080/AT1G55910/ATCG00530/AT1G80660/AT5G33280
GO:0046700	heterocycle catabolic process	168	-0.376727	-1.43114	0.0155148	0.279695	2614	tags=11%, list=13%, signal=9%	AT5G43430/AT2G32550/AT3G09260/AT3G17810/AT4G21600/AT4G03110/AT3G55840/AT2G32070/AT1G19670/AT4G27650/AT1G68760/AT3G30775/AT5G61780/AT1G77680/AT5G38710/AT1G03457/AT2G19570
GO:0044036	cell wall macromolecule metabolic process	144	-0.401528	-1.49855	0.0158273	0.282234	2734	tags=26%, list=13%, signal=22%	AT2G01850/AT3G25140/AT4G01700/AT1G02360/AT4G03210/AT1G32170/AT5G41040/AT4G38300/AT4G14130/AT2G43570/AT2G06850/AT5G48070/AT1G65310/AT1G74380/AT4G28320/AT4G30290/AT1G70230/AT1G78240/AT4G30270/AT2G43610/AT4G33820/AT1G27930/AT2G20370/AT2G43620/AT3G01040/AT4G30280/AT4G26690/AT5G57550/AT1G02310/AT3G02570/AT3G23730/AT2G14690/AT4G25810/AT2G18800/AT2G40230/AT1G10550
GO:0006829	zinc ion transport	13	0.676811	1.68945	0.0159091	0.282234	2181	tags=46%, list=11%, signal=41%	AT1G05300/AT2G30080/AT5G59520/AT1G55910/AT2G19110/AT1G60960
GO:0030176	integral component of endoplasmic reticulum membrane	58	0.452393	1.60153	0.0159151	0.282234	1387	tags=10%, list=7%, signal=10%	AT3G12030/AT4G14390/AT5G50650/AT4G14400/AT4G03450/AT4G03500
GO:0045860	positive regulation of protein kinase activity	49	-0.499937	-1.56486	0.0162338	0.284189	962	tags=16%, list=5%, signal=16%	AT1G53570/AT3G13530/AT1G07150/AT5G67080/AT4G26890/AT2G32510/AT5G55090
GO:0015980	energy derivation by oxidation of organic compounds	50	-0.510304	-1.59398	0.0162866	0.284189	5475	tags=40%, list=27%, signal=29%	AT4G17650/AT3G15640/AT3G02090/AT5G66760/AT4G37830/AT4G28070/AT2G44520/AT1G22840/AT1G52710/AT3G27380/AT3G24090/AT5G40650/AT4G10040/AT4G30490/AT5G67490/AT5G51060/AT3G27220/AT5G25450/AT5G15120
GO:0033674	positive regulation of kinase activity	50	-0.498689	-1.5577	0.0162866	0.284189	962	tags=16%, list=5%, signal=15%	AT1G53570/AT3G13530/AT1G07150/AT5G67080/AT4G26890/AT2G32510/AT5G55090
GO:0010162	seed dormancy process	25	0.575131	1.66916	0.0168269	0.292055	4800	tags=52%, list=24%, signal=40%	AT3G63210/AT1G48130/AT3G22550/AT1G07430/AT3G44750/AT1G55250/AT2G44950/AT2G27840/AT1G48270/AT1G52920/AT5G20700/AT1G22160/AT3G06010
GO:0016872	intramolecular lyase activity	11	0.675785	1.62122	0.017316	0.298953	3152	tags=36%, list=16%, signal=31%	AT4G02780/AT5G66230/AT2G26310/AT5G50375
GO:0015748	organophosphate ester transport	28	-0.575383	-1.61649	0.0174216	0.299193	2806	tags=36%, list=14%, signal=31%	AT1G14560/AT5G07320/AT5G48970/AT3G01550/AT1G22180/AT5G27520/AT1G61800/AT2G38530/AT5G61810
GO:0010383	cell wall polysaccharide metabolic process	120	-0.423081	-1.54103	0.0178838	0.305522	2734	tags=26%, list=13%, signal=22%	AT2G01850/AT3G25140/AT4G03210/AT1G32170/AT5G41040/AT4G38300/AT4G14130/AT2G06850/AT5G48070/AT1G65310/AT1G74380/AT4G28320/AT4G30290/AT1G70230/AT1G78240/AT4G30270/AT4G33820/AT1G27930/AT2G20370/AT3G01040/AT4G30280/AT4G26690/AT5G57550/AT1G02310/AT3G23730/AT2G14690/AT4G25810/AT2G18800/AT2G40230/AT1G10550
GO:0010168	ER body	10	-0.737804	-1.60543	0.0186916	0.314855	5334	tags=90%, list=26%, signal=66%	AT1G54030/AT4G27870/AT1G52400/AT3G09260/AT4G27860/AT5G23830/AT3G15950/AT5G24290
GO:0044452	nucleolar part	67	0.421961	1.52117	0.0187166	0.314855	7277	tags=57%, list=36%, signal=37%	AT1G77310/AT1G31760/AT1G15910/AT4G37110/AT3G44530/AT3G57150/AT4G25630/AT1G54250/AT2G20490/AT5G16750/AT5G66540/AT5G11580/AT5G59980/AT3G57660/AT3G25940/AT5G59390/AT2G35605/AT4G00380/AT1G80790/AT5G23570/AT3G23780/AT3G12860/AT3G48670/AT1G21610/AT5G27120/AT4G12600/AT3G05060/AT3G06530/AT3G12550/AT2G40360/AT3G29375/AT5G08180/AT1G56110/AT5G20600/AT5G14050/AT3G21540/AT1G15440/AT4G40030
GO:0010014	meristem initiation	27	0.538437	1.60335	0.0188235	0.314855	3382	tags=33%, list=17%, signal=28%	AT1G20700/AT4G32880/AT4G13195/AT1G28560/AT5G48160/AT3G15170/AT1G11130/AT5G60690/AT4G28530
GO:0015605	organophosphate ester transmembrane transporter activity	33	-0.551581	-1.60456	0.0188356	0.314855	2938	tags=36%, list=14%, signal=31%	AT3G51870/AT1G14560/AT1G12600/AT5G07320/AT5G56450/AT5G48970/AT3G01550/AT4G23010/AT5G27520/AT1G61800/AT5G61810
GO:0019210	kinase inhibitor activity	23	0.580981	1.66147	0.0189125	0.314855	3163	tags=48%, list=16%, signal=40%	AT3G27630/AT3G50630/AT5G02220/AT5G59360/AT1G08180/AT5G26230/AT2G28870/AT1G51355/AT2G32710/AT2G23430/AT5G48820
GO:0098754	detoxification	54	-0.487334	-1.54386	0.0192308	0.318528	4525	tags=48%, list=22%, signal=38%	AT5G41220/AT1G17170/AT2G02930/AT2G02390/AT1G02920/AT1G78370/AT1G49860/AT1G17190/AT1G02930/AT1G22990/AT4G02520/AT2G47730/AT5G62480/AT2G30870/AT2G29420/AT3G62760/AT2G29470/AT3G09270/AT2G29490/AT2G29460/AT1G69930/AT1G10370/AT1G69920/AT2G29450/AT2G29440
GO:0001666	response to hypoxia	53	-0.484742	-1.5258	0.0195759	0.322606	4717	tags=47%, list=23%, signal=36%	AT1G04700/AT3G20770/AT1G05880/AT5G25250/AT4G32690/AT2G32700/AT5G57610/AT4G31970/AT5G27630/AT4G32551/AT1G19250/AT1G17290/AT5G49190/AT5G63790/AT3G03670/AT1G35140/AT5G54960/AT2G26150/AT1G53910/AT3G14230/AT5G39890/AT5G15120/AT4G37710/AT1G14550
GO:1901681	sulfur compound binding	34	-0.543447	-1.59134	0.020202	0.329533	3810	tags=35%, list=19%, signal=29%	AT5G27630/AT3G55410/AT1G02930/AT5G27380/AT4G02520/AT2G47730/AT2G30870/AT5G54960/AT5G26740/AT2G29450/AT4G33070
GO:0140097	catalytic activity, acting on DNA	152	0.334158	1.37655	0.0202703	0.329533	5926	tags=41%, list=29%, signal=30%	AT5G22470/AT1G14460/AT4G24790/AT2G24250/AT4G18820/AT2G26840/AT1G20720/AT4G02390/AT4G31150/AT5G27680/AT3G10140/AT1G67630/AT1G19340/AT4G30870/AT5G45720/AT2G31320/AT1G03190/AT2G02480/AT4G36050/AT4G35740/AT1G79890/AT2G36720/AT3G25100/AT1G06670/AT1G10520/AT2G07690/AT1G75090/AT1G44900/AT4G17020/AT3G12710/AT3G22880/AT1G10930/AT5G67100/AT5G14620/AT5G04130/AT4G00060/AT4G02060/AT1G18090/AT5G44635/AT1G07745…
GO:0034754	cellular hormone metabolic process	41	-0.50758	-1.53256	0.0203046	0.329533	3453	tags=46%, list=17%, signal=39%	AT1G66340/AT5G03270/AT1G16400/AT3G23630/AT3G53450/AT4G31500/AT1G16410/AT2G22330/AT4G29740/AT2G27760/AT4G28410/AT1G25410/AT3G63440/AT1G75450/AT3G63110/AT1G68460/AT5G06300/AT5G52400
GO:0051781	positive regulation of cell division	12	0.684917	1.68292	0.0204082	0.329533	5088	tags=58%, list=25%, signal=44%	AT4G24860/AT3G21700/AT1G21410/AT3G15220/AT5G16940/AT5G05970/AT5G54840
GO:0015562	efflux transmembrane transporter activity	18	0.628558	1.68161	0.0205011	0.329533	1400	tags=44%, list=7%, signal=41%	AT3G45650/AT1G77110/AT2G01420/AT1G23080/AT1G73590/AT2G36910/AT1G70940/AT1G15460
GO:0072341	modified amino acid binding	22	-0.592806	-1.58446	0.0207972	0.33079	5735	tags=68%, list=28%, signal=49%	AT2G44620/AT4G25050/AT5G42150/AT1G17170/AT1G02920/AT1G02930/AT5G27380/AT4G02520/AT2G47730/AT2G30870/AT1G76180/AT1G20450/AT5G27200/AT2G29450
GO:0019852	L-ascorbic acid metabolic process	19	-0.613191	-1.58051	0.0209424	0.33079	2499	tags=37%, list=12%, signal=32%	AT5G28840/AT2G46750/AT2G39770/AT1G14520/AT2G46740/AT2G19800
GO:0019853	L-ascorbic acid biosynthetic process	19	-0.613191	-1.58051	0.0209424	0.33079	2499	tags=37%, list=12%, signal=32%	AT5G28840/AT2G46750/AT2G39770/AT1G14520/AT2G46740/AT2G19800
GO:0019005	SCF ubiquitin ligase complex	50	-0.486478	-1.51956	0.0211726	0.33079	2455	tags=24%, list=12%, signal=21%	AT5G63160/AT1G12820/AT3G26810/AT2G42620/AT2G02870/AT3G27220/AT2G30600/AT1G15670/AT1G14330/AT5G67480/AT5G25350
GO:0051213	dioxygenase activity	102	-0.422938	-1.50436	0.0212121	0.33079	3386	tags=27%, list=17%, signal=23%	AT4G16765/AT1G52820/AT4G33910/AT1G11950/AT1G20270/AT3G55970/AT3G11180/AT4G03070/AT4G32810/AT5G24530/AT5G07200/AT4G10500/AT3G47190/AT5G58660/AT3G45140/AT1G48740/AT5G43660/AT4G20350/AT3G49620/AT1G14120/AT1G02400/AT5G39890/AT4G10490/AT5G15120/AT5G05600/AT2G30830/AT2G38240
GO:0080043	quercetin 3-O-glucosyltransferase activity	88	-0.43134	-1.50636	0.0213415	0.33079	2760	tags=28%, list=14%, signal=25%	AT2G29750/AT3G07020/AT2G15490/AT1G07240/AT3G55710/AT4G15280/AT2G29730/AT2G22930/AT3G21780/AT3G53150/AT4G15270/AT5G53990/AT2G36760/AT3G46690/AT5G59590/AT1G22400/AT1G22340/AT5G49690/AT4G27560/AT1G22360/AT3G46700/AT5G59580/AT3G22250/AT4G01070
GO:0080044	quercetin 7-O-glucosyltransferase activity	88	-0.43134	-1.50636	0.0213415	0.33079	2760	tags=28%, list=14%, signal=25%	AT2G29750/AT3G07020/AT2G15490/AT1G07240/AT3G55710/AT4G15280/AT2G29730/AT2G22930/AT3G21780/AT3G53150/AT4G15270/AT5G53990/AT2G36760/AT3G46690/AT5G59590/AT1G22400/AT1G22340/AT5G49690/AT4G27560/AT1G22360/AT3G46700/AT5G59580/AT3G22250/AT4G01070
GO:0006694	steroid biosynthetic process	67	0.419722	1.5131	0.0213904	0.33079	1626	tags=16%, list=8%, signal=15%	AT4G15310/AT5G50600/AT5G50700/AT1G65670/AT5G45340/AT5G14700/AT4G10020/AT3G13730/AT5G05690/AT4G36380/AT4G15393
GO:0005262	calcium channel activity	32	0.511261	1.60085	0.0215311	0.330971	1311	tags=19%, list=6%, signal=18%	AT3G12030/AT1G27770/AT4G35290/AT2G29100/AT5G66650/AT1G05200
GO:0009308	amine metabolic process	86	-0.446563	-1.54879	0.0216049	0.330971	3902	tags=41%, list=19%, signal=33%	AT4G27070/AT5G15950/AT5G17990/AT3G23630/AT3G53450/AT3G02470/AT1G28680/AT4G31500/AT5G05730/AT5G07080/AT1G69370/AT2G22330/AT4G08870/AT4G34710/AT3G59050/AT2G04400/AT4G29740/AT2G27760/AT1G09240/AT1G25410/AT3G17717/AT1G31710/AT3G55840/AT3G25570/AT3G63440/AT1G65840/AT1G75450/AT3G63110/AT5G05590/AT5G60890/AT1G68460/AT5G06300/AT5G28237/AT5G52400
GO:0000325	plant-type vacuole	74	0.402331	1.48383	0.0217984	0.332374	2504	tags=23%, list=12%, signal=20%	AT5G09400/AT1G49320/AT1G17810/AT4G28520/AT1G03890/AT1G73190/AT5G44120/AT1G03880/AT2G27420/AT1G75820/AT3G60970/AT3G13080/AT5G27150/AT4G32940/AT3G62700/AT3G60160/AT4G01470
GO:0042803	protein homodimerization activity	190	-0.36528	-1.40431	0.0222222	0.336288	2656	tags=16%, list=13%, signal=14%	AT4G00570/AT5G27380/AT4G08960/AT3G28180/AT4G17870/AT2G32550/AT3G09260/AT5G50960/AT4G26750/AT4G24660/AT4G01026/AT5G02200/AT1G14687/AT3G49250/AT4G19003/AT2G39180/AT2G36100/AT1G49950/AT5G63240/AT5G58750/AT2G27370/AT1G51800/AT5G13220/AT2G40330/AT4G16780/AT2G42870/AT2G38310/AT5G46790/AT2G19570
GO:0019439	aromatic compound catabolic process	191	-0.364464	-1.3995	0.0223464	0.336288	2614	tags=12%, list=13%, signal=11%	AT5G43430/AT2G32550/AT3G09260/AT4G21600/AT3G53260/AT2G20340/AT5G48100/AT5G24530/AT4G03110/AT4G10500/AT3G55840/AT2G32070/AT1G19670/AT4G27650/AT1G68760/AT4G10490/AT5G01040/AT5G61780/AT1G77680/AT1G03457/AT5G01050/AT2G19570
GO:0009073	aromatic amino acid family biosynthetic process	55	-0.483005	-1.53423	0.0223642	0.336288	4442	tags=36%, list=22%, signal=28%	AT3G29200/AT1G09795/AT5G66120/AT4G27070/AT1G11790/AT5G17990/AT2G22250/AT4G31500/AT5G05730/AT1G69370/AT1G48850/AT2G04400/AT1G22410/AT1G71920/AT5G05590/AT2G45300/AT5G60890/AT4G39980/AT5G28237
GO:0051606	detection of stimulus	108	-0.423165	-1.51458	0.0224888	0.336609	1847	tags=17%, list=9%, signal=15%	AT2G32250/AT1G52520/AT1G31480/AT5G41730/AT5G04190/AT5G27060/AT5G61270/AT1G53910/AT1G18810/AT1G02340/AT4G14640/AT5G39890/AT4G16780/AT1G14280/AT5G15120/AT5G46330/AT2G02950
GO:0007584	response to nutrient	20	-0.603604	-1.55769	0.0231317	0.344651	1081	tags=30%, list=5%, signal=28%	AT5G60300/AT5G51060/AT3G02570/AT4G21830/AT1G61120
GO:0010067	procambium histogenesis	10	0.687497	1.62947	0.0235546	0.347749	1637	tags=50%, list=8%, signal=46%	AT1G46480/AT5G61480/AT1G05470/AT4G32880/AT4G13195
GO:0061695	transferase complex, transferring phosphorus-containing groups	100	0.372596	1.43054	0.0235988	0.347749	5139	tags=31%, list=25%, signal=23%	AT1G14460/AT4G24790/AT4G14520/AT2G15400/AT4G18820/AT1G68990/AT5G10060/AT5G15700/AT1G63020/AT2G41340/AT1G67630/AT5G45720/AT3G61420/AT2G02480/AT2G24120/AT3G57080/AT1G54250/AT1G18340/AT1G06790/AT3G54180/AT3G57660/AT3G25940/AT5G27620/AT5G67100/AT3G18770/AT5G48630/AT1G03760/AT1G76540/AT4G21670/AT3G23780/AT5G41880
GO:0009644	response to high light intensity	75	-0.453096	-1.51668	0.0236593	0.347749	2313	tags=21%, list=11%, signal=19%	AT2G41430/AT1G07350/AT2G29500/AT2G26150/AT2G42540/AT4G12400/AT5G24810/AT1G54050/AT1G05347/AT1G74310/AT3G51910/AT3G12580/AT1G01470/AT2G17840/AT2G46240
GO:0034655	nucleobase-containing compound catabolic process	126	-0.404137	-1.4771	0.0238095	0.348388	515	tags=4%, list=3%, signal=4%	AT5G61780/AT1G77680/AT1G03457/AT2G19570
GO:0009505	plant-type cell wall	230	-0.34166	-1.33712	0.0242588	0.352507	2343	tags=21%, list=12%, signal=19%	AT3G01190/AT4G11290/AT1G12240/AT5G26120/AT2G30490/AT2G43570/AT2G06850/AT1G05240/AT4G13340/AT3G03670/AT1G65310/AT1G35140/AT4G20860/AT5G14450/AT4G08950/AT1G53830/AT2G44450/AT5G06870/AT3G02880/AT1G75750/AT4G30270/AT5G45280/AT1G09550/AT1G74000/AT1G27950/AT3G28550/AT4G12420/AT2G34700/AT3G54590/AT5G51550/AT4G22470/AT4G26690/AT5G64100/AT3G54580/AT5G17820/AT5G48450/AT1G23720/AT3G28200/AT3G52500/AT3G45970…
GO:1901990	regulation of mitotic cell cycle phase transition	38	0.487928	1.59204	0.0243902	0.352507	5471	tags=45%, list=27%, signal=33%	AT1G29770/AT1G15570/AT1G13448/AT3G21700/AT1G69400/AT2G44950/AT1G49910/AT4G30870/AT3G48150/AT3G25100/AT3G54180/AT3G05870/AT4G21530/AT1G76540/AT5G54840/AT1G79280/AT2G38620
GO:0051187	cofactor catabolic process	93	-0.435313	-1.52599	0.0244275	0.352507	2545	tags=25%, list=13%, signal=22%	AT5G66390/AT3G49120/AT3G01190/AT4G11290/AT1G05240/AT1G68850/AT3G03670/AT5G19880/AT1G07890/AT5G14130/AT1G19670/AT5G05340/AT5G64100/AT5G06720/AT5G17820/AT3G28200/AT1G30870/AT1G05250/AT5G39580/AT4G26010/AT4G37530/AT1G14550
GO:0035821	modification of morphology or physiology of other organism	74	0.393472	1.45116	0.0245232	0.352507	1228	tags=23%, list=6%, signal=22%	AT5G42242/AT5G19175/AT3G43505/AT3G48231/AT1G13755/AT5G44973/AT2G02147/AT1G05460/AT1G13607/AT1G13609/AT1G54445/AT3G16895/AT3G05727/AT2G02140/AT3G27835/AT2G21465/AT5G56369
GO:0004888	transmembrane signaling receptor activity	202	0.320065	1.36271	0.025	0.357785	4230	tags=41%, list=21%, signal=32%	AT1G65800/AT4G30520/AT2G01950/AT5G47070/AT5G20480/AT4G28490/AT2G01830/AT4G35030/AT3G45410/AT5G23170/AT3G05140/AT3G08760/AT1G21590/AT2G41820/AT1G77280/AT1G60800/AT4G35290/AT2G33580/AT4G21380/AT2G29100/AT1G72540/AT4G34440/AT3G09780/AT1G69790/AT2G42960/AT1G20650/AT5G06820/AT1G05200/AT2G18890/AT2G17820/AT3G13380/AT4G13190/AT5G46570/AT3G25560/AT2G05940/AT4G02010/AT3G59420/AT4G02482/AT2G31880/AT2G16640…
GO:0005385	zinc ion transmembrane transporter activity	16	0.641322	1.68062	0.0252874	0.359037	5617	tags=69%, list=28%, signal=50%	AT1G05300/AT2G30080/AT1G10970/AT1G55910/AT1G60960/AT3G58810/AT2G04032/AT2G04620/AT3G12750/AT1G68100/AT2G29410
GO:0042575	DNA polymerase complex	11	0.668567	1.60391	0.025974	0.359037	2854	tags=45%, list=14%, signal=39%	AT1G14460/AT4G24790/AT4G18820/AT5G45720/AT2G02480
GO:0048859	formation of anatomical boundary	11	0.665141	1.59569	0.025974	0.359037	3382	tags=64%, list=17%, signal=53%	AT2G31160/AT1G26780/AT5G59340/AT5G63090/AT3G15170/AT3G28860/AT4G28530
GO:0090691	formation of plant organ boundary	11	0.665141	1.59569	0.025974	0.359037	3382	tags=64%, list=17%, signal=53%	AT2G31160/AT1G26780/AT5G59340/AT5G63090/AT3G15170/AT3G28860/AT4G28530
GO:0042343	indole glucosinolate metabolic process	29	-0.547253	-1.54568	0.026087	0.359037	3031	tags=45%, list=15%, signal=38%	AT2G23190/AT3G09260/AT5G36220/AT5G53810/AT4G37400/AT3G28740/AT1G77520/AT1G77530/AT5G67310/AT1G63140/AT5G60890/AT4G37410
GO:0016151	nickel cation binding	13	-0.679889	-1.61338	0.0266904	0.359037	930	tags=23%, list=5%, signal=22%	AT1G20450/AT3G50970
GO:0046417	chorismate metabolic process	14	-0.668657	-1.60637	0.0266904	0.359037	4386	tags=57%, list=22%, signal=45%	AT3G29200/AT5G66120/AT1G69370/AT1G48850/AT1G22410/AT2G45300/AT4G39980
GO:0102336	3-oxo-arachidoyl-CoA synthase activity	20	-0.589352	-1.52091	0.0266904	0.359037	3388	tags=65%, list=17%, signal=54%	AT4G34520/AT2G46720/AT3G10280/AT2G28630/AT1G25450/AT5G43760/AT4G34250/AT2G26640/AT3G52160/AT1G01120/AT1G19440/AT2G16280
GO:0102337	3-oxo-cerotoyl-CoA synthase activity	20	-0.589352	-1.52091	0.0266904	0.359037	3388	tags=65%, list=17%, signal=54%	AT4G34520/AT2G46720/AT3G10280/AT2G28630/AT1G25450/AT5G43760/AT4G34250/AT2G26640/AT3G52160/AT1G01120/AT1G19440/AT2G16280
GO:0102338	3-oxo-lignoceronyl-CoA synthase activity	20	-0.589352	-1.52091	0.0266904	0.359037	3388	tags=65%, list=17%, signal=54%	AT4G34520/AT2G46720/AT3G10280/AT2G28630/AT1G25450/AT5G43760/AT4G34250/AT2G26640/AT3G52160/AT1G01120/AT1G19440/AT2G16280
GO:0102756	very-long-chain 3-ketoacyl-CoA synthase activity	20	-0.589352	-1.52091	0.0266904	0.359037	3388	tags=65%, list=17%, signal=54%	AT4G34520/AT2G46720/AT3G10280/AT2G28630/AT1G25450/AT5G43760/AT4G34250/AT2G26640/AT3G52160/AT1G01120/AT1G19440/AT2G16280
GO:0048509	regulation of meristem development	105	0.369373	1.42786	0.0267062	0.359037	2716	tags=27%, list=13%, signal=23%	AT5G03150/AT5G39860/AT1G18835/AT3G54720/AT5G46260/AT1G74660/AT5G43810/AT2G01830/AT1G03170/AT5G50080/AT5G44160/AT1G27360/AT2G42640/AT5G15160/AT1G67710/AT3G06020/AT1G75820/AT1G04020/AT5G13290/AT1G27320/AT4G20270/AT1G55350/AT5G46270/AT3G15150/AT2G26170/AT1G65470/AT5G46700/AT2G34720
GO:0010087	phloem or xylem histogenesis	67	0.416704	1.50222	0.026738	0.359037	3942	tags=43%, list=19%, signal=35%	AT5G61480/AT5G64530/AT1G20700/AT5G10250/AT5G01170/AT4G32880/AT3G21710/AT4G08150/AT3G22810/AT4G13195/AT2G28250/AT5G23080/AT5G02030/AT1G27320/AT1G64625/AT3G09070/AT5G43870/AT4G32780/AT5G19530/AT4G14740/AT5G60690/AT5G50820/AT1G62990/AT1G13980/AT2G18290/AT1G09540/AT5G13180/AT5G62940/AT4G31910
GO:1900057	positive regulation of leaf senescence	12	-0.69604	-1.60407	0.026738	0.359037	1289	tags=58%, list=6%, signal=55%	AT5G14930/AT1G05100/AT2G45210/AT1G77450/AT4G22620/AT4G12410
GO:1905623	positive regulation of leaf development	12	-0.69604	-1.60407	0.026738	0.359037	1289	tags=58%, list=6%, signal=55%	AT5G14930/AT1G05100/AT2G45210/AT1G77450/AT4G22620/AT4G12410
GO:0006364	rRNA processing	197	0.3212	1.3703	0.027027	0.360565	7631	tags=44%, list=38%, signal=28%	AT1G51380/AT5G10605/AT3G09160/AT3G20420/AT5G14580/AT4G26600/AT2G21070/AT3G52905/AT2G04270/AT3G13740/AT3G57150/AT1G06720/AT1G17690/AT2G34260/AT4G25630/AT5G51730/AT2G20490/AT3G15460/AT5G16750/AT4G28450/AT4G10620/AT5G66540/AT3G11964/AT2G31890/AT1G69070/AT2G25355/AT3G22660/AT5G26180/AT1G75660/AT4G18905/AT5G46420/AT5G63420/AT3G01160/AT1G59760/AT3G12860/AT3G04770/AT1G25260/AT3G46210/AT5G22440/AT1G45230…
GO:0005788	endoplasmic reticulum lumen	40	-0.503385	-1.51065	0.0270728	0.360565	2899	tags=42%, list=14%, signal=37%	AT4G16660/AT3G62600/AT1G08450/AT1G04980/AT2G19500/AT1G52410/AT2G35540/AT4G28395/AT1G52400/AT3G09260/AT1G66270/AT3G08970/AT3G15950/AT1G66280/AT1G51760/AT5G28510
GO:1905268	negative regulation of chromatin organization	14	0.638619	1.62087	0.0272727	0.361752	4283	tags=57%, list=21%, signal=45%	AT5G11470/AT3G24140/AT1G04020/AT4G39100/AT3G48430/AT3G15120/AT3G63270/AT4G18470
GO:1901987	regulation of cell cycle phase transition	42	0.476483	1.57052	0.0275689	0.362959	5471	tags=43%, list=27%, signal=31%	AT1G29770/AT1G15570/AT1G13448/AT3G21700/AT1G69400/AT2G44950/AT1G49910/AT4G30870/AT3G48150/AT3G25100/AT1G14350/AT3G54180/AT3G05870/AT4G21530/AT1G76540/AT5G54840/AT1G79280/AT2G38620
GO:0048508	embryonic meristem development	16	0.633254	1.65948	0.0275862	0.362959	1637	tags=50%, list=8%, signal=46%	AT1G46480/AT5G61480/AT1G05470/AT1G21590/AT4G32880/AT1G69270/AT4G02010/AT4G13195
GO:0030135	coated vesicle	43	-0.493099	-1.50925	0.0277778	0.363565	3454	tags=28%, list=17%, signal=23%	AT5G16830/AT2G21190/AT3G59500/AT1G21900/AT1G25240/AT5G42090/AT1G08400/AT2G25430/AT4G25070/AT1G05020/AT5G10410
GO:0031225	anchored component of membrane	199	-0.348659	-1.34256	0.0278552	0.363565	2413	tags=22%, list=12%, signal=19%	AT5G57920/AT4G35100/AT5G60950/AT5G51480/AT5G04310/AT2G42365/AT4G28365/AT3G07320/AT3G43720/AT3G57270/AT4G27520/AT2G32300/AT2G44790/AT3G02880/AT4G20260/AT5G55180/AT5G56170/AT3G52470/AT3G13520/AT1G65240/AT1G27950/AT4G12420/AT5G65390/AT5G15350/AT5G20230/AT5G13900/AT4G36945/AT1G03870/AT4G12730/AT4G26690/AT2G24450/AT3G51350/AT5G48450/AT4G26830/AT3G57260/AT5G53250/AT4G28280/AT4G37450/AT3G04010/AT2G23130…
GO:0009116	nucleoside metabolic process	69	-0.455932	-1.50589	0.0282575	0.364174	2	tags=23%, list=0%, signal=23%	AT1G71100/AT4G04880/AT1G55810/AT2G36310/AT5G65860/AT5G15950/AT4G26510/AT1G10700/AT3G02470/AT1G17410/AT5G11160/AT3G17717/AT3G25570/AT2G35390/AT2G19570
GO:0001933	negative regulation of protein phosphorylation	23	0.564374	1.61398	0.0283688	0.364174	2635	tags=39%, list=13%, signal=34%	AT1G29770/AT3G50630/AT1G79030/AT2G20470/AT1G01760/AT5G63190/AT5G57050/AT2G32710/AT2G23430
GO:0042326	negative regulation of phosphorylation	23	0.564374	1.61398	0.0283688	0.364174	2635	tags=39%, list=13%, signal=34%	AT1G29770/AT3G50630/AT1G79030/AT2G20470/AT1G01760/AT5G63190/AT5G57050/AT2G32710/AT2G23430
GO:0043243	positive regulation of protein complex disassembly	12	-0.688697	-1.58714	0.0285205	0.364174	2173	tags=50%, list=11%, signal=45%	AT4G28000/AT2G01330/AT4G20260/AT1G64110/AT5G52882
GO:0004601	peroxidase activity	105	-0.412841	-1.47574	0.0285714	0.364174	2502	tags=25%, list=12%, signal=22%	AT5G66390/AT3G49120/AT3G63080/AT3G01190/AT2G47730/AT4G11290/AT1G05240/AT1G68850/AT3G03670/AT5G19880/AT1G07890/AT5G14130/AT5G05340/AT5G07390/AT5G64100/AT5G06720/AT5G17820/AT3G28200/AT5G51060/AT1G30870/AT1G05250/AT5G39580/AT4G26010/AT4G37530/AT1G14550
GO:0015217	ADP transmembrane transporter activity	15	-0.654111	-1.58867	0.0285714	0.364174	3577	tags=47%, list=18%, signal=38%	AT5G13490/AT1G14560/AT5G07320/AT5G56450/AT5G27520/AT5G61810
GO:0040029	regulation of gene expression, epigenetic	95	0.368081	1.40892	0.0289855	0.368014	5280	tags=32%, list=26%, signal=23%	AT1G69440/AT1G05460/AT1G66700/AT5G11470/AT4G25530/AT3G49240/AT4G13570/AT4G39100/AT1G63020/AT5G04290/AT1G08060/AT5G04940/AT2G35160/AT5G44280/AT2G14825/AT4G11130/AT4G02020/AT5G46910/AT4G13940/AT3G15120/AT5G59390/AT1G77300/AT3G63270/AT2G23740/AT3G23780/AT1G32490/AT5G02560/AT1G76630/AT3G48670/AT5G49160
GO:0042910	xenobiotic transmembrane transporter activity	46	-0.484865	-1.5026	0.0291734	0.36883	1933	tags=20%, list=10%, signal=18%	AT1G11670/AT4G39030/AT4G23030/AT2G04040/AT1G15150/AT3G23550/AT1G12950/AT5G44050
GO:0042542	response to hydrogen peroxide	71	-0.442895	-1.47672	0.0292758	0.36883	2784	tags=27%, list=14%, signal=23%	AT5G05410/AT1G34190/AT1G16420/AT5G63160/AT2G29500/AT2G26150/AT1G77420/AT5G46350/AT4G12400/AT5G24810/AT1G54050/AT5G10720/AT1G05347/AT1G74310/AT3G12580/AT1G73260/AT2G46240/AT5G67480
GO:0044030	regulation of DNA methylation	16	0.622692	1.6318	0.0298851	0.371922	2575	tags=31%, list=13%, signal=27%	AT5G36740/AT5G36670/AT5G11470/AT3G56790/AT1G05380
GO:0006302	double-strand break repair	75	0.379247	1.40182	0.0298913	0.371922	5964	tags=47%, list=29%, signal=33%	AT4G31400/AT2G24250/AT1G04020/AT1G20720/AT4G02390/AT5G64630/AT3G09660/AT5G15920/AT5G27680/AT3G15150/AT1G65470/AT5G54260/AT4G30870/AT5G40820/AT4G35740/AT3G25100/AT3G59550/AT1G10520/AT1G80210/AT1G10930/AT5G67100/AT4G00020/AT3G23100/AT1G31360/AT3G05210/AT2G17036/AT5G41150/AT5G15170/AT1G66730/AT3G19210/AT5G64520/AT3G05740/AT1G27880/AT3G07800/AT3G12530
GO:0006123	mitochondrial electron transport, cytochrome c to oxygen	10	-0.720585	-1.56796	0.0299065	0.371922	5078	tags=70%, list=25%, signal=53%	AT4G37830/AT4G28070/AT1G22840/AT1G52710/AT4G10040/AT4G30490
GO:0033993	response to lipid	479	-0.304614	-1.26457	0.0302297	0.371922	2977	tags=21%, list=15%, signal=18%	AT4G33950/AT1G32740/AT2G33700/AT5G57710/AT5G67300/AT4G15400/AT2G17290/AT5G28770/AT1G52400/AT5G45820/AT3G47620/AT2G36890/AT1G55870/AT4G34710/AT1G08930/AT4G35100/AT5G52660/AT4G25000/AT3G57120/AT1G66350/AT3G07370/AT3G63010/AT5G41790/AT1G12240/AT2G41230/AT1G76180/AT3G07360/AT3G61460/AT2G32690/AT1G67100/AT3G51550/AT5G14920/AT4G18010/AT3G21780/AT3G28210/AT3G59220/AT3G16570/AT2G42540/AT3G61890/AT4G39070…
GO:2000762	regulation of phenylpropanoid metabolic process	14	-0.663926	-1.59501	0.0302491	0.371922	2658	tags=50%, list=13%, signal=43%	AT3G23590/AT4G09820/AT5G05340/AT5G20230/AT3G59940/AT1G15670
GO:0010444	guard mother cell differentiation	11	0.663271	1.5912	0.030303	0.371922	6259	tags=82%, list=31%, signal=57%	AT3G24140/AT1G15570/AT4G34160/AT5G67260/AT1G14350/AT3G54180/AT3G50070/AT2G38620/AT3G48750
GO:0004860	protein kinase inhibitor activity	22	0.563708	1.5977	0.0305882	0.371922	3163	tags=45%, list=16%, signal=38%	AT3G27630/AT3G50630/AT5G02220/AT5G59360/AT1G08180/AT2G28870/AT1G51355/AT2G32710/AT2G23430/AT5G48820
GO:0043547	positive regulation of GTPase activity	35	-0.514924	-1.50673	0.0306644	0.371922	2016	tags=26%, list=10%, signal=23%	AT3G17980/AT2G01540/AT3G07890/AT5G52580/AT1G70790/AT3G02460/AT4G28550/AT4G27100
GO:0008202	steroid metabolic process	85	0.375548	1.41733	0.0308123	0.371922	1626	tags=15%, list=8%, signal=14%	AT4G15310/AT5G50600/AT5G50700/AT1G65670/AT5G45340/AT2G36800/AT5G14700/AT4G10020/AT3G13730/AT2G26710/AT5G05690/AT4G36380/AT4G15393
GO:0006665	sphingolipid metabolic process	47	-0.485787	-1.51086	0.0310458	0.371922	4548	tags=36%, list=22%, signal=28%	AT1G27980/AT5G19200/AT4G22330/AT1G69640/AT3G06060/AT3G61580/AT3G54020/AT2G38010/AT1G13580/AT3G48780/AT5G49900/AT1G14290/AT3G48790/AT4G36830/AT1G26200/AT2G46210
GO:0009788	negative regulation of abscisic acid-activated signaling pathway	43	-0.48345	-1.47972	0.0310458	0.371922	2483	tags=26%, list=12%, signal=23%	AT1G24625/AT3G51550/AT3G11410/AT5G10720/AT1G51800/AT3G02140/AT5G01810/AT2G41940/AT5G25160/AT5G64750
GO:1901420	negative regulation of response to alcohol	43	-0.48345	-1.47972	0.0310458	0.371922	2483	tags=26%, list=12%, signal=23%	AT1G24625/AT3G51550/AT3G11410/AT5G10720/AT1G51800/AT3G02140/AT5G01810/AT2G41940/AT5G25160/AT5G64750
GO:1905958	negative regulation of cellular response to alcohol	43	-0.48345	-1.47972	0.0310458	0.371922	2483	tags=26%, list=12%, signal=23%	AT1G24625/AT3G51550/AT3G11410/AT5G10720/AT1G51800/AT3G02140/AT5G01810/AT2G41940/AT5G25160/AT5G64750
GO:0003899	DNA-directed 5'-3' RNA polymerase activity	46	0.446063	1.49436	0.0311688	0.371922	5932	tags=37%, list=29%, signal=26%	AT4G14520/AT2G15400/AT1G68990/AT5G15700/AT1G63020/AT2G41340/AT3G53920/AT2G24120/AT3G57080/AT1G06790/AT3G57660/AT3G25940/AT5G67100/AT3G23780/AT5G41880/AT5G52800/AT1G01210
GO:2001251	negative regulation of chromosome organization	26	0.534262	1.56544	0.03125	0.371922	4283	tags=42%, list=21%, signal=33%	AT5G11470/AT3G24140/AT1G13448/AT1G04020/AT1G69400/AT4G39100/AT1G49910/AT3G48430/AT3G15120/AT3G63270/AT4G18470
GO:0010072	primary shoot apical meristem specification	14	0.630926	1.60135	0.0318182	0.371922	2460	tags=21%, list=12%, signal=19%	AT1G20700/AT4G32880/AT3G15170
GO:0016144	S-glycoside biosynthetic process	39	-0.501594	-1.50084	0.0319328	0.371922	4965	tags=56%, list=24%, signal=43%	AT2G20610/AT1G74100/AT5G23010/AT4G12030/AT4G13430/AT5G14200/AT1G65860/AT1G12140/AT1G24100/AT1G62560/AT2G25450/AT4G23100/AT1G16400/AT4G31500/AT1G16410/AT2G22330/AT3G19710/AT4G28410/AT1G65880/AT5G60890/AT2G30830
GO:0019758	glycosinolate biosynthetic process	39	-0.501594	-1.50084	0.0319328	0.371922	4965	tags=56%, list=24%, signal=43%	AT2G20610/AT1G74100/AT5G23010/AT4G12030/AT4G13430/AT5G14200/AT1G65860/AT1G12140/AT1G24100/AT1G62560/AT2G25450/AT4G23100/AT1G16400/AT4G31500/AT1G16410/AT2G22330/AT3G19710/AT4G28410/AT1G65880/AT5G60890/AT2G30830
GO:0019761	glucosinolate biosynthetic process	39	-0.501594	-1.50084	0.0319328	0.371922	4965	tags=56%, list=24%, signal=43%	AT2G20610/AT1G74100/AT5G23010/AT4G12030/AT4G13430/AT5G14200/AT1G65860/AT1G12140/AT1G24100/AT1G62560/AT2G25450/AT4G23100/AT1G16400/AT4G31500/AT1G16410/AT2G22330/AT3G19710/AT4G28410/AT1G65880/AT5G60890/AT2G30830
GO:0080167	response to karrikin	94	-0.419249	-1.47581	0.0319635	0.371922	2540	tags=21%, list=13%, signal=19%	AT1G06520/AT4G34710/AT5G07460/AT2G47730/AT5G06980/AT1G31350/AT3G53260/AT2G30490/AT5G64620/AT4G39070/AT3G57520/AT5G51550/AT1G10370/AT2G01150/AT1G61800/AT3G45060/AT5G05600/AT3G09440/AT4G13510
GO:0045338	farnesyl diphosphate metabolic process	13	-0.677773	-1.60837	0.0320285	0.371922	2964	tags=69%, list=15%, signal=59%	AT2G23800/AT4G34640/AT4G13280/AT4G34650/AT3G14530/AT3G29430/AT4G36810/AT1G49530
GO:0019725	cellular homeostasis	278	0.287357	1.26028	0.0321101	0.371922	2284	tags=14%, list=11%, signal=12%	AT3G12030/AT1G76800/AT5G52750/AT5G61350/AT3G24450/AT1G48130/AT3G61190/AT2G47160/AT5G52760/AT4G16370/AT2G28660/AT1G03120/AT3G53720/AT1G65970/AT1G47271/AT5G63530/AT4G33040/AT1G78120/AT2G38170/AT1G50950/AT1G03850/AT4G37480/AT1G74810/AT3G06130/AT1G15460/AT5G26690/AT3G17790/AT3G21460/AT5G52740/AT1G64500/AT3G14070/AT3G51860/AT1G23000/AT5G27150/AT5G14870/AT1G21140/AT1G53300/AT1G69880
GO:0016072	rRNA metabolic process	202	0.309409	1.31734	0.0321429	0.371922	7490	tags=43%, list=37%, signal=27%	AT1G51380/AT5G10605/AT3G09160/AT3G20420/AT4G04180/AT5G14580/AT4G26600/AT2G21070/AT3G52905/AT2G04270/AT3G13740/AT3G57150/AT1G06720/AT1G17690/AT2G34260/AT4G25630/AT5G51730/AT2G20490/AT3G15460/AT5G16750/AT4G28450/AT4G10620/AT5G66540/AT3G11964/AT2G31890/AT1G69070/AT2G25355/AT3G22660/AT5G26180/AT1G75660/AT4G18905/AT5G46420/AT5G63420/AT3G01160/AT1G59760/AT3G12860/AT4G15420/AT3G04770/AT1G25260/AT3G46210…
GO:0045489	pectin biosynthetic process	50	-0.467173	-1.45926	0.0325733	0.372062	2734	tags=28%, list=13%, signal=24%	AT3G25140/AT1G02720/AT5G47780/AT5G41040/AT1G24170/AT5G06700/AT1G78240/AT3G01040/AT3G50760/AT3G58790/AT4G02130/AT2G33570/AT2G40230
GO:0055076	transition metal ion homeostasis	105	0.35923	1.38866	0.032641	0.372062	3035	tags=29%, list=15%, signal=24%	AT1G76800/AT5G52750/AT3G56980/AT3G24450/AT5G52760/AT4G16370/AT2G28660/AT5G04150/AT5G63530/AT4G34600/AT2G38170/AT5G24380/AT3G06130/AT2G41240/AT5G26690/AT3G47640/AT5G13740/AT5G52740/AT3G51860/AT1G23000/AT2G19110/AT5G53550/AT1G21140/AT1G60960/AT1G58340/AT3G56970/AT3G08040/AT2G37390/AT1G71050/AT3G07600
GO:0008194	UDP-glycosyltransferase activity	223	-0.333361	-1.30177	0.0326531	0.372062	3517	tags=25%, list=17%, signal=21%	AT1G70090/AT2G37585/AT3G53160/AT3G46660/AT5G09870/AT5G05170/AT5G49190/AT3G62720/AT3G15350/AT2G39445/AT5G12890/AT4G01750/AT2G29750/AT3G25140/AT3G07020/AT2G15490/AT1G56550/AT2G25540/AT1G02720/AT1G07240/AT5G47780/AT3G55710/AT4G15280/AT1G24170/AT4G27480/AT2G29730/AT2G22930/AT5G64740/AT3G21780/AT4G03550/AT3G03050/AT3G53150/AT3G07160/AT4G15270/AT5G53990/AT2G36760/AT3G46690/AT3G01040/AT1G61280/AT5G16910…
GO:0000295	adenine nucleotide transmembrane transporter activity	22	-0.573011	-1.53155	0.0329289	0.372062	3577	tags=41%, list=18%, signal=34%	AT3G51870/AT1G14560/AT1G12600/AT5G07320/AT5G56450/AT4G23010/AT5G27520/AT5G61810
GO:0005346	purine ribonucleotide transmembrane transporter activity	22	-0.573011	-1.53155	0.0329289	0.372062	3577	tags=41%, list=18%, signal=34%	AT3G51870/AT1G14560/AT1G12600/AT5G07320/AT5G56450/AT4G23010/AT5G27520/AT5G61810
GO:0015216	purine nucleotide transmembrane transporter activity	22	-0.573011	-1.53155	0.0329289	0.372062	3577	tags=41%, list=18%, signal=34%	AT3G51870/AT1G14560/AT1G12600/AT5G07320/AT5G56450/AT4G23010/AT5G27520/AT5G61810
GO:0016798	hydrolase activity, acting on glycosyl bonds	333	-0.320023	-1.29587	0.0329531	0.372062	2743	tags=21%, list=14%, signal=18%	AT1G78520/AT2G01850/AT1G52400/AT1G11580/AT1G69830/AT4G01700/AT3G09260/AT1G02360/AT3G60130/AT1G66270/AT4G25000/AT4G03210/AT1G32170/AT3G55430/AT4G38300/AT1G12240/AT4G19720/AT5G26120/AT4G14130/AT2G43570/AT2G06850/AT5G48070/AT1G65310/AT5G49900/AT4G34260/AT2G42365/AT3G07320/AT3G57270/AT4G19820/AT4G28320/AT3G06500/AT2G44470/AT1G76130/AT4G30290/AT2G44450/AT3G06770/AT1G48930/AT4G30270/AT5G55180/AT2G43610…
GO:0098803	respiratory chain complex	72	-0.436199	-1.44849	0.033123	0.372691	8637	tags=67%, list=43%, signal=38%	AT5G40770/AT5G52840/AT4G02580/AT5G47570/AT3G03100/AT5G11770/AT3G52730/AT5G13430/AT1G47260/AT1G14450/AT3G12260/AT2G42210/AT5G08530/AT5G37510/AT3G03070/AT3G17240/AT2G20360/AT2G46505/AT1G47420/AT1G16700/AT1G79010/AT5G62575/AT4G34700/AT5G67590/AT4G32470/AT1G08480/AT3G27240/AT2G02510/AT1G51980/AT4G32210/AT2G33220/AT4G28510/AT5G09600/AT3G15640/AT3G02090/AT2G20530/AT5G66760/AT4G37830/AT5G13440/AT1G04630…
GO:0004553	hydrolase activity, hydrolyzing O-glycosyl compounds	306	-0.326062	-1.30745	0.0333761	0.374248	2743	tags=22%, list=14%, signal=20%	AT1G78520/AT2G01850/AT1G52400/AT1G69830/AT4G01700/AT3G09260/AT1G02360/AT3G60130/AT1G66270/AT4G25000/AT4G03210/AT1G32170/AT3G55430/AT4G38300/AT1G12240/AT4G19720/AT5G26120/AT4G14130/AT2G43570/AT2G06850/AT5G48070/AT1G65310/AT5G49900/AT4G34260/AT2G42365/AT3G07320/AT3G57270/AT4G19820/AT4G28320/AT3G06500/AT2G44470/AT1G76130/AT4G30290/AT2G44450/AT3G06770/AT1G48930/AT4G30270/AT5G55180/AT2G43610/AT4G33820…
GO:0090575	RNA polymerase II transcription factor complex	55	-0.46672	-1.4825	0.0335463	0.374787	1510	tags=13%, list=7%, signal=12%	AT5G51790/AT4G25410/AT4G25400/AT5G51780/AT1G62975/AT1G12540
GO:0001934	positive regulation of protein phosphorylation	54	-0.463829	-1.46939	0.0336538	0.374787	962	tags=31%, list=5%, signal=30%	AT5G45190/AT5G12980/AT4G08470/AT4G36950/AT2G47410/AT1G05100/AT4G19600/AT2G32550/AT3G07980/AT1G53570/AT3G13530/AT1G07150/AT5G67080/AT4G26890/AT2G32510/AT5G55090
GO:0015215	nucleotide transmembrane transporter activity	25	-0.559263	-1.55074	0.0341297	0.376412	3577	tags=36%, list=18%, signal=30%	AT3G51870/AT1G14560/AT1G12600/AT5G07320/AT5G56450/AT4G23010/AT5G27520/AT5G61810
GO:0010223	secondary shoot formation	18	0.594832	1.59138	0.0341686	0.376412	2521	tags=56%, list=12%, signal=49%	AT3G18550/AT1G73870/AT5G61480/AT2G27990/AT3G24420/AT5G02030/AT3G14067/AT2G26170/AT3G15170/AT4G37470
GO:0010346	shoot axis formation	18	0.594832	1.59138	0.0341686	0.376412	2521	tags=56%, list=12%, signal=49%	AT3G18550/AT1G73870/AT5G61480/AT2G27990/AT3G24420/AT5G02030/AT3G14067/AT2G26170/AT3G15170/AT4G37470
GO:0048829	root cap development	10	0.665984	1.57848	0.0342612	0.376412	2472	tags=50%, list=12%, signal=44%	AT2G38120/AT2G21050/AT1G77690/AT3G59420/AT5G46080
GO:0048316	seed development	55	0.415531	1.45843	0.0345745	0.378579	4691	tags=35%, list=23%, signal=27%	AT1G49320/AT3G61880/AT1G01070/AT5G05860/AT5G24380/AT4G01430/AT1G32560/AT4G34160/AT1G64625/AT5G53550/AT5G67260/AT5G06760/AT1G53130/AT3G23070/AT3G27670/AT4G14510/AT5G12840/AT3G50070/AT1G13120
GO:0005199	structural constituent of cell wall	19	-0.597599	-1.54032	0.034904	0.380909	1962	tags=32%, list=10%, signal=29%	AT3G22800/AT3G28550/AT3G54590/AT3G54580/AT1G23720
GO:0017144	drug metabolic process	496	-0.301185	-1.25208	0.035109	0.381246	3863	tags=23%, list=19%, signal=19%	AT4G33220/AT5G43780/ATCG00470/AT5G65860/AT1G11790/AT5G15950/AT3G62000/AT2G38230/AT1G52710/AT2G37040/AT1G64060/AT3G10720/AT3G12500/AT2G23620/AT1G70090/AT2G36880/AT4G26910/AT4G39940/AT5G55070/AT2G22250/AT4G30170/AT3G02470/AT1G49570/AT5G58730/AT3G47950/AT5G13450/AT1G36370/AT2G02720/AT3G27400/AT4G01750/AT1G11580/AT3G25140/AT4G01700/ATCG00480/AT2G26440/AT5G61760/AT3G29360/ATCG00130/AT5G64640/AT1G02720…
GO:0016837	carbon-oxygen lyase activity, acting on polysaccharides	22	0.557582	1.58034	0.0352941	0.381246	1728	tags=32%, list=9%, signal=29%	AT4G22080/AT4G13710/AT4G24780/AT1G67750/AT4G13210/AT5G63180/AT1G30350
GO:0030570	pectate lyase activity	22	0.557582	1.58034	0.0352941	0.381246	1728	tags=32%, list=9%, signal=29%	AT4G22080/AT4G13710/AT4G24780/AT1G67750/AT4G13210/AT5G63180/AT1G30350
GO:0003774	motor activity	82	0.375711	1.41657	0.0354223	0.381246	6305	tags=55%, list=31%, signal=38%	AT5G54280/AT5G20450/AT3G10310/AT1G18410/AT1G21730/AT2G21300/AT3G19960/AT1G50360/AT5G47820/AT4G26660/AT3G20150/AT3G44050/AT5G54670/AT3G51150/AT5G06670/AT3G16060/AT1G63640/AT3G49650/AT2G20290/AT5G02370/AT2G22610/AT4G14330/AT3G58160/AT4G27180/AT5G33300/AT5G65930/AT1G18550/AT2G21380/AT3G44730/AT4G14150/AT4G27370/AT3G19050/AT4G21270/AT1G17580/AT5G66310/AT3G45850/AT2G28620/AT3G23670/AT4G15930/AT1G59540…
GO:0050790	regulation of catalytic activity	217	-0.336083	-1.30992	0.0355191	0.381246	3063	tags=17%, list=15%, signal=15%	AT5G47550/AT1G32740/AT2G01690/AT4G08960/AT2G44740/AT4G17870/AT4G28480/AT3G50850/AT5G52200/AT2G31305/AT3G05327/AT5G15930/AT5G23600/AT3G17980/AT2G01540/AT3G07980/AT3G16420/AT5G64620/AT3G07890/AT5G52580/AT1G70790/AT3G02460/AT4G28550/AT3G19150/AT1G53570/AT3G13530/AT1G07150/AT4G27100/AT4G17470/AT5G67080/AT4G26890/AT4G16500/AT4G19700/AT2G32510/AT5G55090/AT5G46790
GO:0009690	cytokinin metabolic process	26	-0.558738	-1.55506	0.0358362	0.383388	2170	tags=42%, list=11%, signal=38%	AT3G53450/AT4G29740/AT2G27760/AT1G25410/AT3G63440/AT1G75450/AT3G63110/AT1G68460/AT5G06300/AT5G52400
GO:0071555	cell wall organization	433	-0.305998	-1.264	0.0361882	0.385889	2699	tags=20%, list=13%, signal=18%	AT1G11580/AT2G22330/AT3G28180/AT2G26440/AT1G56550/AT5G64640/AT2G25540/AT1G02720/AT5G47780/AT3G01190/AT4G03210/AT3G50240/AT1G32170/AT4G11290/AT1G53840/AT4G14130/AT2G06850/AT1G05240/AT4G13340/AT2G35650/AT1G24170/AT5G04310/AT3G22800/AT5G20860/AT5G48070/AT3G03670/AT5G64740/AT1G65310/AT5G50750/AT4G15980/AT5G48930/AT4G03550/AT4G02320/AT3G03050/AT4G30290/AT3G08900/AT1G53830/AT5G22940/AT4G02330/AT5G06700…
GO:0042327	positive regulation of phosphorylation	55	-0.46274	-1.46986	0.0367412	0.389828	962	tags=31%, list=5%, signal=30%	AT5G45190/AT5G12980/AT4G08470/AT4G36950/AT2G47410/AT1G05100/AT4G19600/AT2G32550/AT3G07980/AT1G53570/AT3G13530/AT1G07150/AT5G67080/AT4G26890/AT2G32510/AT5G55090
GO:0005089	Rho guanyl-nucleotide exchange factor activity	11	0.655125	1.57166	0.0367965	0.389828	830	tags=27%, list=4%, signal=26%	AT5G05940/AT1G31650/AT5G02010
GO:0005347	ATP transmembrane transporter activity	16	-0.624406	-1.53607	0.037037	0.389845	3577	tags=50%, list=18%, signal=41%	AT2G39970/AT5G13490/AT3G51870/AT5G07320/AT5G56450/AT5G27520/AT5G61810
GO:1902936	phosphatidylinositol bisphosphate binding	11	-0.701461	-1.56738	0.037037	0.389845	5147	tags=73%, list=25%, signal=54%	AT4G30510/AT3G15730/AT3G62770/AT3G56440/AT2G40810/AT4G20260/AT2G42010
GO:0051703	intraspecies interaction between organisms	14	-0.65265	-1.56792	0.0373665	0.390792	1900	tags=36%, list=9%, signal=32%	AT3G24715/AT3G51550/AT3G45040/AT3G60260
GO:0080027	response to herbivore	14	-0.65292	-1.56857	0.0373665	0.390792	1315	tags=43%, list=6%, signal=40%	AT3G45140/AT3G16400/AT3G44860/AT3G44870/AT1G61120
GO:0009765	photosynthesis, light harvesting	23	0.548282	1.56796	0.0378251	0.394323	5962	tags=52%, list=29%, signal=37%	AT2G34420/AT2G05070/AT5G54270/AT1G29920/AT1G19150/AT3G08940/AT1G29910/AT1G61520/AT2G21970/AT4G10340/AT3G47470/AT3G27690
GO:0010410	hemicellulose metabolic process	92	-0.403395	-1.41247	0.0381679	0.396631	2279	tags=23%, list=11%, signal=20%	AT1G32170/AT4G38300/AT4G14130/AT2G06850/AT5G48070/AT1G65310/AT1G74380/AT4G30290/AT1G70230/AT4G30270/AT4G33820/AT1G27930/AT2G20370/AT4G30280/AT5G57550/AT3G23730/AT2G14690/AT4G25810/AT2G18800/AT1G10550
GO:0009743	response to carbohydrate	100	-0.401373	-1.42789	0.0392157	0.406225	2153	tags=33%, list=11%, signal=30%	AT5G03730/AT3G06850/AT5G08790/AT2G30470/AT2G28190/AT1G04700/AT5G61230/AT1G01130/AT2G28900/AT5G57610/AT5G57090/AT4G01900/AT4G37220/AT5G28770/AT3G49340/AT1G08830/AT4G18300/AT4G30850/AT5G45890/AT3G54320/AT1G01140/AT3G12700/AT4G20260/AT4G22970/AT1G61800/AT3G16350/AT1G72180/AT3G02570/AT5G56840/AT3G16690/AT5G52310/AT5G64750
GO:0009768	photosynthesis, light harvesting in photosystem I	21	0.567548	1.60277	0.0394432	0.407288	5962	tags=52%, list=29%, signal=37%	AT2G34420/AT2G05070/AT5G54270/AT1G29920/AT1G19150/AT3G08940/AT1G29910/AT1G61520/AT4G10340/AT3G47470/AT3G27690
GO:0006865	amino acid transport	56	0.412126	1.44461	0.0396825	0.407605	2237	tags=30%, list=11%, signal=27%	AT4G38250/AT1G25530/AT3G28960/AT2G37460/AT1G01070/AT2G38120/AT5G23810/AT4G01430/AT2G21050/AT1G24400/AT2G39890/AT1G77690/AT4G08290/AT5G24920/AT3G54830/AT2G37450/AT4G08300
GO:0031338	regulation of vesicle fusion	23	-0.561756	-1.51775	0.0397237	0.407605	2016	tags=26%, list=10%, signal=24%	AT3G07890/AT5G52580/AT3G02460/AT4G28550/AT4G27100
GO:0010564	regulation of cell cycle process	88	0.359721	1.355	0.0404624	0.410335	5173	tags=34%, list=25%, signal=26%	AT3G01600/AT1G29770/AT5G64910/AT1G15570/AT1G13448/AT4G24860/AT1G04020/AT5G49430/AT3G21700/AT1G69400/AT1G55350/AT2G44950/AT3G18524/AT3G15150/AT1G49910/AT4G30870/AT2G46980/AT3G48150/AT3G25100/AT2G18290/AT1G14350/AT3G54180/AT3G05870/AT4G21530/AT4G32730/AT5G16940/AT1G76540/AT5G05970/AT5G54840/AT1G79280
GO:0008094	DNA-dependent ATPase activity	68	0.386794	1.3994	0.0405405	0.410335	6023	tags=50%, list=30%, signal=35%	AT2G24250/AT4G02070/AT3G24320/AT1G20720/AT5G27680/AT3G18524/AT3G10140/AT1G03190/AT4G35740/AT1G79890/AT2G36720/AT3G25100/AT1G06670/AT2G07690/AT1G44900/AT4G17020/AT3G22880/AT1G10930/AT5G04130/AT4G02060/AT5G44635/AT1G07745/AT1G31360/AT2G17036/AT1G04730/AT3G23890/AT2G16440/AT5G64520/AT3G05740/AT5G04110/AT2G01440/AT1G27880/AT2G19490/AT5G10950
GO:0009749	response to glucose	36	-0.501527	-1.48294	0.0405405	0.410335	3143	tags=25%, list=15%, signal=21%	AT5G28770/AT3G49340/AT4G18300/AT5G45890/AT4G22970/AT1G61800/AT3G16690/AT5G64750
GO:0048029	monosaccharide binding	38	-0.491842	-1.46815	0.0405405	0.410335	3345	tags=26%, list=16%, signal=22%	AT4G33910/AT1G05010/AT1G20270/AT3G42850/AT3G20040/AT2G42540/AT1G48740/AT5G43660/AT1G50460
GO:0016160	amylase activity	11	-0.68773	-1.5367	0.0407407	0.410335	3233	tags=64%, list=16%, signal=54%	AT3G23920/AT4G17090/AT1G69830/AT4G25000/AT1G76130/AT5G18670
GO:1901264	carbohydrate derivative transport	47	-0.467958	-1.45541	0.0408497	0.410335	3411	tags=28%, list=17%, signal=23%	AT1G76670/AT4G05110/AT1G14560/AT5G07320/AT3G01550/AT4G23010/AT3G47960/AT4G31600/AT5G27520/AT4G05120/AT1G61800/AT5G61810
GO:0006898	receptor-mediated endocytosis	25	-0.550248	-1.52575	0.0409556	0.410335	2620	tags=24%, list=13%, signal=21%	AT5G42090/AT5G47330/AT4G17470/AT1G75310/AT5G46330
GO:0080161	auxin transmembrane transporter activity	18	0.587304	1.57124	0.0410023	0.410335	2303	tags=50%, list=11%, signal=44%	AT1G77110/AT2G01420/AT1G23080/AT1G73590/AT2G36910/AT2G38120/AT1G70940/AT1G77690/AT1G02520
GO:0009423	chorismate biosynthetic process	10	-0.692261	-1.50633	0.0411215	0.410335	2473	tags=60%, list=12%, signal=53%	AT5G66120/AT1G48850/AT1G22410/AT2G45300/AT4G39980
GO:0017048	Rho GTPase binding	17	0.596856	1.57492	0.0414747	0.411343	1345	tags=24%, list=7%, signal=22%	AT5G05940/AT1G31650/AT5G02010/AT4G24580
GO:0030275	LRR domain binding	17	0.595153	1.57043	0.0414747	0.411343	3194	tags=47%, list=16%, signal=40%	AT5G38340/AT4G16880/AT2G14080/AT5G11250/AT5G61330/AT3G04210/AT4G16860/AT3G25510
GO:0051347	positive regulation of transferase activity	62	-0.442164	-1.43345	0.0417335	0.412656	962	tags=13%, list=5%, signal=12%	AT1G53570/AT3G13530/AT1G07150/AT5G67080/AT4G26890/AT2G32510/AT5G55090
GO:0043087	regulation of GTPase activity	39	-0.489689	-1.46522	0.0420168	0.414202	2016	tags=23%, list=10%, signal=21%	AT3G17980/AT2G01540/AT3G07890/AT5G52580/AT1G70790/AT3G02460/AT4G28550/AT4G27100
GO:0070887	cellular response to chemical stimulus	303	-0.31957	-1.28056	0.042362	0.416347	3999	tags=26%, list=20%, signal=22%	AT4G31970/AT4G23570/AT1G71930/AT3G04110/AT5G54060/AT2G37430/AT4G27870/AT5G12140/AT3G25190/AT1G29395/AT2G32400/AT1G19250/AT1G31020/AT3G24090/AT2G19590/AT2G15970/AT5G56010/AT3G20660/AT3G07700/AT1G05010/AT5G08160/AT3G53480/AT5G19820/AT4G03460/AT3G60320/AT3G59410/AT1G34190/AT5G28770/AT5G18610/AT1G59730/AT1G76080/AT5G07460/AT4G27860/AT5G07320/AT5G19000/AT1G08830/AT5G41790/AT1G12240/AT1G12820/AT2G41230…
GO:0019915	lipid storage	18	0.578851	1.54863	0.0432802	0.419531	3992	tags=56%, list=20%, signal=45%	AT1G05510/AT3G27660/AT4G25140/AT5G07600/AT5G07520/AT4G18550/AT5G40420/AT5G07550/AT5G07540/AT5G07530
GO:0005663	DNA replication factor C complex	11	0.638301	1.5313	0.04329	0.419531	6097	tags=73%, list=30%, signal=51%	AT1G14460/AT4G24790/AT4G18820/AT5G45720/AT2G02480/AT1G04730/AT1G63160/AT1G77470
GO:0010562	positive regulation of phosphorus metabolic process	62	-0.439327	-1.42426	0.0433387	0.419531	4701	tags=29%, list=23%, signal=22%	AT5G45190/AT5G12980/AT4G08470/AT4G36950/AT2G47410/AT1G05100/AT4G19600/AT4G08960/AT2G32550/AT3G07980/AT1G53570/AT3G13530/AT1G07150/AT5G67080/AT4G26890/AT2G32510/AT5G55090
GO:0045937	positive regulation of phosphate metabolic process	62	-0.439327	-1.42426	0.0433387	0.419531	4701	tags=29%, list=23%, signal=22%	AT5G45190/AT5G12980/AT4G08470/AT4G36950/AT2G47410/AT1G05100/AT4G19600/AT4G08960/AT2G32550/AT3G07980/AT1G53570/AT3G13530/AT1G07150/AT5G67080/AT4G26890/AT2G32510/AT5G55090
GO:0019751	polyol metabolic process	60	-0.44514	-1.43326	0.0436187	0.419531	2512	tags=18%, list=12%, signal=16%	AT3G55440/AT5G16760/AT4G18010/AT3G01640/AT1G14520/AT3G02040/AT5G41080/AT4G26690/AT4G08170/AT2G19800
GO:0046467	membrane lipid biosynthetic process	77	-0.420494	-1.41774	0.0436817	0.419531	3705	tags=29%, list=18%, signal=23%	AT3G07215/AT1G69640/AT4G21220/AT3G06060/AT3G07700/AT2G39445/AT3G61580/AT3G54020/AT1G13580/AT1G24793/AT3G48780/AT1G74340/AT1G14290/AT5G24810/AT3G48790/AT1G61280/AT4G36830/AT4G31780/AT1G26200/AT5G27200/AT2G46210
GO:0022904	respiratory electron transport chain	39	-0.487587	-1.45893	0.0436975	0.419531	5078	tags=54%, list=25%, signal=40%	AT4G34700/AT4G32470/AT3G27240/AT3G15640/AT3G02090/AT5G66760/AT4G37830/AT4G28070/AT2G07718/ATMG00160/AT1G22840/ATMG00590/AT1G52710/AT3G27380/AT5G40650/AT4G10040/AT4G30490/ATCG00720/ATMG00580/AT5G25450
GO:0003333	amino acid transmembrane transport	41	0.444561	1.47226	0.0437956	0.419531	2237	tags=34%, list=11%, signal=30%	AT4G38250/AT1G25530/AT3G28960/AT2G37460/AT1G01070/AT2G38120/AT5G23810/AT4G01430/AT2G21050/AT1G77690/AT4G08290/AT3G54830/AT2G37450/AT4G08300
GO:0042446	hormone biosynthetic process	135	-0.364619	-1.34964	0.0439239	0.419531	3453	tags=30%, list=17%, signal=25%	AT3G23630/AT2G19590/AT3G53450/AT1G01480/AT2G45400/AT1G68320/AT4G26200/AT4G31500/AT1G05010/AT1G16410/AT1G19630/AT3G59060/AT2G22330/AT4G16760/AT2G27760/AT4G28410/AT4G32810/AT1G18870/AT5G07200/AT5G42650/AT1G25410/AT3G25780/AT3G47190/AT5G58660/AT4G39030/AT5G43890/AT3G45140/AT3G63110/AT2G06050/AT1G02400/AT3G03990/AT4G28720/AT5G61780/AT4G37770/AT1G68460/AT5G06300/AT3G25770/AT5G52400/AT3G25760/AT1G05800
GO:0035251	UDP-glucosyltransferase activity	149	-0.356068	-1.33496	0.0439716	0.419531	2760	tags=21%, list=14%, signal=19%	AT2G29750/AT3G07020/AT2G15490/AT2G25540/AT1G07240/AT3G55710/AT4G15280/AT2G29730/AT2G22930/AT5G64740/AT3G21780/AT4G03550/AT3G03050/AT3G53150/AT3G07160/AT4G15270/AT5G53990/AT2G36760/AT3G46690/AT5G16910/AT2G36850/AT5G59590/AT1G22400/AT1G22340/AT5G49690/AT4G27560/AT1G22360/AT3G46700/AT5G59580/AT3G22250/AT4G01070
GO:0047262	polygalacturonate 4-alpha-galacturonosyltransferase activity	25	-0.542655	-1.50469	0.0443686	0.422084	4768	tags=52%, list=23%, signal=40%	AT2G20810/AT1G74088/AT3G62660/AT1G70090/AT3G25140/AT1G02720/AT5G47780/AT1G24170/AT3G01040/AT3G50760/AT3G58790/AT4G02130
GO:0005802	trans-Golgi network	209	-0.333071	-1.29558	0.0451436	0.427479	4838	tags=28%, list=24%, signal=21%	AT3G61130/AT3G49720/AT2G22900/AT1G18630/AT2G20810/AT4G37690/AT5G39510/AT3G62830/AT2G26890/AT5G52210/AT3G66654/AT5G66120/AT1G28490/AT5G45550/AT2G40280/AT3G13900/AT1G08720/AT1G67330/AT2G38360/AT2G40380/AT5G05170/AT1G61250/AT4G30440/AT3G62720/AT2G03250/AT5G54830/AT1G20270/AT1G14040/AT4G18030/AT3G25140/AT3G54020/AT3G28180/AT1G76270/AT4G02195/AT4G30260/AT1G53840/AT1G26730/AT1G74380/AT2G34300/AT4G21560…
GO:0005216	ion channel activity	86	0.357496	1.34931	0.0451977	0.427479	2947	tags=26%, list=15%, signal=22%	AT3G12030/AT2G25600/AT1G27770/AT4G22200/AT4G35290/AT2G29100/AT5G66650/AT2G46440/AT5G33280/AT2G48060/AT1G05200/AT1G07430/AT3G02850/AT5G14870/AT3G51480/AT4G01840/AT2G29110/AT1G19780/AT5G48400/AT5G46240/AT5G54250/AT4G35920
GO:0051348	negative regulation of transferase activity	26	0.512287	1.50105	0.0456731	0.430726	2635	tags=35%, list=13%, signal=30%	AT3G50630/AT1G79030/AT4G04180/AT2G20470/AT1G01760/AT5G63190/AT5G57050/AT2G32710/AT2G23430
GO:0012511	monolayer-surrounded lipid storage body	16	0.594244	1.55725	0.045977	0.432343	3992	tags=56%, list=20%, signal=45%	AT3G27660/AT2G25890/AT4G25140/AT5G07600/AT5G07520/AT5G40420/AT5G07550/AT5G07540/AT5G07530
GO:0006812	cation transport	279	0.286256	1.25662	0.0462963	0.432816	3108	tags=18%, list=15%, signal=15%	AT3G12030/AT5G09400/AT1G76800/AT5G52750/AT3G53530/AT3G24450/AT3G24300/AT1G05300/AT2G30080/AT5G59520/AT5G52760/AT4G16370/AT2G28660/AT2G25090/AT3G53720/AT4G35290/AT1G64780/AT2G29100/AT5G63530/AT2G38170/AT1G15520/AT1G55910/ATCG00530/AT1G80660/AT1G05200/AT3G06130/AT5G26690/AT2G39890/AT5G52740/AT3G02850/AT1G23000/AT5G27150/AT2G29650/AT2G19110/AT1G21140/AT1G60960/AT3G51480/AT5G05630/AT4G01840/AT2G29110…
GO:0005543	phospholipid binding	108	-0.383821	-1.37377	0.0464768	0.432816	4424	tags=33%, list=22%, signal=26%	AT5G05710/AT2G29700/AT4G32160/AT5G55910/AT2G28320/AT1G70800/AT3G15730/AT3G44100/AT1G53320/AT5G37740/AT1G76900/AT3G62770/AT2G43160/AT5G44610/AT5G65020/AT2G25350/AT3G16785/AT1G08860/AT3G56440/AT1G25240/AT1G65480/AT1G76180/AT3G17980/AT2G01540/AT1G70790/AT2G40810/AT4G20260/AT2G42010/AT2G25430/AT4G14368/AT2G38760/AT2G38750/AT1G20450/AT1G05020/AT5G10410
GO:0042393	histone binding	63	0.387019	1.38771	0.0465116	0.432816	6720	tags=44%, list=33%, signal=30%	AT5G36740/AT5G36670/AT5G20510/AT1G20900/AT5G49430/AT5G64630/AT4G39100/AT5G26210/AT1G65470/AT1G05380/AT2G16485/AT3G15120/AT5G63550/AT3G11450/AT4G30200/AT3G06010/AT4G14920/AT5G39550/AT1G66050/AT4G09550/AT3G44600/AT1G65440/AT1G73790/AT2G27970/AT1G57820/AT5G19310/AT1G05910/AT4G22140
GO:0009408	response to heat	202	-0.341134	-1.31832	0.0470914	0.432816	3634	tags=28%, list=18%, signal=23%	AT3G25230/AT4G23100/AT5G48570/AT5G15270/AT1G79440/AT5G45710/AT5G65020/AT4G36990/AT5G56010/AT5G02500/AT5G06780/AT5G64360/AT1G32330/AT1G09090/AT5G64400/AT5G49910/AT5G05410/AT5G51070/AT1G21910/AT3G11020/AT5G58070/AT3G47220/AT3G08970/AT4G18300/AT2G29500/AT5G02490/AT1G07890/AT3G19130/AT5G62390/AT4G29770/AT2G26150/AT2G39770/AT2G42540/AT5G53060/AT4G12400/AT1G12610/AT2G17690/AT1G54050/AT1G20440/AT1G59860…
GO:0001906	cell killing	57	0.405664	1.42809	0.047619	0.432816	1228	tags=28%, list=6%, signal=26%	AT5G42242/AT5G19175/AT3G43505/AT3G48231/AT1G13755/AT5G44973/AT2G02147/AT1G13607/AT1G13609/AT1G54445/AT3G16895/AT3G05727/AT2G02140/AT3G27835/AT2G21465/AT5G56369
GO:0009411	response to UV	109	0.334973	1.30636	0.047619	0.432816	3524	tags=23%, list=17%, signal=19%	AT3G50930/AT5G54470/AT1G19320/AT5G26920/AT1G79180/AT5G59820/AT2G27420/AT2G36910/AT1G73805/AT3G45640/AT1G56520/AT2G42690/AT5G05690/AT5G03240/AT2G47460/AT3G55580/AT3G52430/AT4G00730/AT1G29410/AT1G03190/AT3G45890/AT3G28860/AT5G09740/AT1G10520/AT2G01180
GO:0015085	calcium ion transmembrane transporter activity	56	0.406115	1.42354	0.047619	0.432816	1311	tags=12%, list=6%, signal=12%	AT3G12030/AT1G27770/AT4G35290/AT2G29100/AT5G66650/AT2G38170/AT1G05200
GO:0031400	negative regulation of protein modification process	42	0.442941	1.45996	0.047619	0.432816	2833	tags=31%, list=14%, signal=27%	AT1G29770/AT3G50630/AT1G79030/AT3G24140/AT2G20470/AT1G01760/AT1G04020/AT4G39100/AT5G63190/AT5G57050/AT2G32710/AT2G23430/AT3G48430
GO:0031640	killing of cells of other organism	57	0.405664	1.42809	0.047619	0.432816	1228	tags=28%, list=6%, signal=26%	AT5G42242/AT5G19175/AT3G43505/AT3G48231/AT1G13755/AT5G44973/AT2G02147/AT1G13607/AT1G13609/AT1G54445/AT3G16895/AT3G05727/AT2G02140/AT3G27835/AT2G21465/AT5G56369
GO:0042447	hormone catabolic process	16	-0.610349	-1.50149	0.047619	0.432816	2170	tags=44%, list=11%, signal=39%	AT5G24530/AT4G10500/AT1G75450/AT1G14120/AT1G02400/AT4G10490
GO:0044364	disruption of cells of other organism	57	0.405664	1.42809	0.047619	0.432816	1228	tags=28%, list=6%, signal=26%	AT5G42242/AT5G19175/AT3G43505/AT3G48231/AT1G13755/AT5G44973/AT2G02147/AT1G13607/AT1G13609/AT1G54445/AT3G16895/AT3G05727/AT2G02140/AT3G27835/AT2G21465/AT5G56369
GO:0048870	cell motility	16	-0.608962	-1.49807	0.047619	0.432816	1275	tags=25%, list=6%, signal=23%	AT3G51110/AT3G60260/AT1G19310
GO:0036452	ESCRT complex	18	-0.595054	-1.50843	0.0479574	0.43468	4758	tags=50%, list=23%, signal=38%	AT2G36680/AT1G03950/AT1G20110/AT4G29160/AT4G19003/AT4G21560/AT5G13860/AT5G09260
GO:0006643	membrane lipid metabolic process	102	-0.39166	-1.39311	0.0484848	0.437412	3705	tags=25%, list=18%, signal=21%	AT3G07215/AT1G69640/AT4G21220/AT3G06060/AT3G07700/AT2G39445/AT3G61580/AT4G11830/AT3G54020/AT3G54950/AT2G38010/AT1G13580/AT1G24793/AT3G48780/AT5G49900/AT1G74340/AT1G14290/AT5G24810/AT3G48790/AT1G61280/AT4G36830/AT4G31780/AT1G26200/AT5G27200/AT2G46210
GO:0009593	detection of chemical stimulus	27	-0.535496	-1.49072	0.0485269	0.437412	6020	tags=56%, list=30%, signal=39%	AT4G26570/AT3G51920/AT4G32040/AT4G39400/AT3G05360/AT3G23110/AT1G66340/AT1G61380/AT4G18710/AT5G27060/AT1G53910/AT4G14640/AT5G39890/AT5G15120
GO:0031409	pigment binding	21	0.557025	1.57305	0.0487239	0.437978	5962	tags=52%, list=29%, signal=37%	AT2G34420/AT2G05070/AT5G54270/AT1G29920/AT1G19150/AT3G08940/AT1G29910/AT1G61520/AT4G10340/AT3G47470/AT3G27690
GO:0140104	molecular carrier activity	17	-0.596719	-1.49499	0.0492958	0.441468	6799	tags=71%, list=33%, signal=47%	AT3G05020/AT4G33520/AT2G44620/AT4G25050/AT1G12520/AT3G15352/AT1G08510/AT4G27940/AT3G56240/AT2G46320/AT5G27200
GO:0005509	calcium ion binding	208	-0.332954	-1.29381	0.0493827	0.441468	3338	tags=23%, list=16%, signal=19%	AT5G65020/AT4G35310/AT1G76640/AT3G50360/AT4G05020/AT3G22930/AT3G56800/AT1G18890/AT1G09090/AT2G17290/AT2G01918/AT4G11830/AT1G69830/AT5G07320/AT4G17615/AT5G57190/AT4G25000/AT2G32450/AT4G31100/AT4G37010/AT1G76180/AT4G23650/AT4G21940/AT2G41110/AT1G53210/AT2G34940/AT3G10660/AT1G16150/AT1G76130/AT1G18210/AT4G20260/AT3G10300/AT3G03000/AT1G35670/AT3G43810/AT5G07920/AT5G07390/AT1G02270/AT2G38760/AT2G38750…
GO:0005798	Golgi-associated vesicle	20	-0.566044	-1.46076	0.0498221	0.444179	3241	tags=40%, list=16%, signal=34%	AT2G21190/AT3G59500/AT5G08160/AT1G21900/AT2G29900/AT1G08400/AT3G62690
GO:0019646	aerobic electron transport chain	11	-0.673251	-1.50435	0.05	0.44455	5078	tags=73%, list=25%, signal=55%	AT3G15640/AT4G37830/AT4G28070/AT1G22840/AT1G52710/AT4G10040/AT4G30490
GO:0045926	negative regulation of growth	27	-0.53104	-1.47832	0.05026	0.445647	2103	tags=37%, list=10%, signal=33%	AT1G02900/AT3G51550/AT5G27930/AT3G16570/AT4G20260/AT4G17470/AT5G52240/AT1G14920/AT1G05800
GO:0005905	clathrin-coated pit	21	-0.564564	-1.48423	0.0507881	0.44911	3090	tags=29%, list=15%, signal=24%	AT1G25240/AT5G22770/AT2G25430/AT1G05020/AT5G10410
GO:0005976	polysaccharide metabolic process	394	-0.304195	-1.2495	0.0515971	0.454089	3530	tags=24%, list=17%, signal=21%	AT3G12500/AT1G70090/AT3G29810/AT4G32551/AT3G45400/AT5G62220/AT3G06550/AT5G09870/AT3G23920/AT5G05170/AT5G49190/AT4G24260/AT5G44480/AT3G62720/AT4G17090/AT2G02720/AT3G27400/AT4G01750/AT2G01850/AT1G11580/AT3G25140/AT1G69830/AT4G01700/AT2G26440/AT3G29360/AT5G64640/AT2G25540/AT1G02720/AT1G02360/AT5G47780/AT4G03210/AT1G32170/AT5G41040/AT1G53840/AT4G38300/AT4G19720/AT4G14130/AT2G43570/AT2G06850/AT1G24170…
GO:0006820	anion transport	205	-0.333207	-1.29505	0.0519126	0.454089	2914	tags=23%, list=14%, signal=20%	AT1G53470/AT1G69870/AT2G03250/AT3G60320/AT1G14560/AT3G57280/AT4G19030/AT1G14040/AT5G50200/AT3G13050/AT5G63850/AT5G07320/AT1G26730/AT4G35180/AT5G48970/AT3G01550/AT5G40890/AT4G23010/AT1G22180/AT1G78610/AT3G47960/AT5G15240/AT4G17970/AT4G25010/AT1G12110/AT1G08090/AT2G03240/AT5G02170/AT4G31600/AT5G27520/AT3G56200/AT1G61800/AT2G36590/AT2G38530/AT3G14810/AT1G71960/AT1G72180/AT1G35350/AT2G39130/AT5G09470…
GO:0010329	auxin efflux transmembrane transporter activity	15	0.586038	1.51814	0.0520362	0.454089	951	tags=40%, list=5%, signal=38%	AT1G77110/AT2G01420/AT1G23080/AT1G73590/AT2G36910/AT1G70940
GO:0009072	aromatic amino acid family metabolic process	75	-0.418356	-1.40039	0.0520505	0.454089	4442	tags=36%, list=22%, signal=28%	AT3G29200/AT1G09795/AT2G02390/AT5G66120/AT4G27070/AT1G11790/AT2G37040/AT5G17990/AT2G22250/AT4G31500/AT5G05730/AT1G69370/AT2G22330/AT4G08870/AT1G48850/AT2G04400/AT3G53260/AT2G20340/AT1G22410/AT3G55840/AT1G71920/AT5G05590/AT2G45300/AT5G60890/AT4G39980/AT5G28237
GO:0045229	external encapsulating structure organization	461	-0.299605	-1.23901	0.0521212	0.454089	2699	tags=20%, list=13%, signal=17%	AT1G11580/AT2G22330/AT3G28180/AT2G26440/AT1G56550/AT5G64640/AT2G25540/AT1G02720/AT5G47780/AT3G01190/AT4G03210/AT3G50240/AT1G32170/AT4G11290/AT1G53840/AT4G14130/AT2G06850/AT1G05240/AT4G13340/AT2G35650/AT1G24170/AT5G04310/AT3G22800/AT5G20860/AT5G48070/AT3G03670/AT5G64740/AT1G65310/AT3G07320/AT5G50750/AT4G15980/AT5G48930/AT4G03550/AT2G34850/AT4G02320/AT3G03050/AT4G30290/AT3G08900/AT1G53830/AT5G22940…
GO:0044270	cellular nitrogen compound catabolic process	168	-0.348207	-1.3228	0.0521862	0.454089	2614	tags=10%, list=13%, signal=8%	AT5G43430/AT2G32550/AT3G09260/AT3G17810/AT4G21600/AT4G03110/AT3G55840/AT2G32070/AT1G19670/AT4G27650/AT1G68760/AT5G61780/AT1G77680/AT1G03457/AT2G19570
GO:0015079	potassium ion transmembrane transporter activity	62	0.384659	1.37051	0.0527704	0.456143	3922	tags=39%, list=19%, signal=31%	AT5G09400/AT2G25600/AT4G22200/AT5G14880/AT2G46440/AT1G07430/AT5G13740/AT3G14070/AT3G02850/AT2G40540/AT5G27150/AT1G70300/AT5G14870/AT4G01840/AT1G31120/AT1G19780/AT5G46240/AT5G54250/AT2G23980/AT1G60160/AT1G30450/AT2G35060/AT2G46430/AT2G46450
GO:0097305	response to alcohol	394	-0.303788	-1.24783	0.0528256	0.456143	2732	tags=19%, list=13%, signal=17%	AT5G28770/AT1G52400/AT5G45820/AT3G47620/AT2G36890/AT1G55870/AT1G08650/AT4G34710/AT1G08930/AT4G35100/AT5G52660/AT4G25000/AT3G57120/AT3G07370/AT5G41790/AT2G41230/AT1G76180/AT3G07360/AT2G32690/AT5G14920/AT4G18010/AT3G21780/AT3G28210/AT3G59220/AT2G42540/AT3G61890/AT1G18100/AT4G23600/AT5G46350/AT3G02880/AT1G75750/AT4G34240/AT4G39260/AT4G34990/AT5G59550/AT1G49950/AT5G65160/AT1G12420/AT3G11410/AT5G35750…
GO:0048532	anatomical structure arrangement	25	0.515125	1.49501	0.0528846	0.456143	6449	tags=64%, list=32%, signal=44%	AT2G45450/AT5G06250/AT1G73590/AT2G35350/AT5G64630/AT5G46700/AT1G19350/AT1G27370/AT5G55540/AT2G45190/AT3G44600/AT4G29040/AT3G50660/AT5G05980/AT1G69120/AT5G16780
GO:0055086	nucleobase-containing small molecule metabolic process	368	-0.30461	-1.24399	0.0532178	0.456143	4668	tags=20%, list=23%, signal=16%	AT1G60440/AT1G26570/AT3G62830/AT1G31220/AT1G09780/AT1G80380/AT4G33790/AT2G07698/AT1G71100/AT4G04880/AT1G55810/AT5G01310/AT5G42740/AT1G75210/AT2G36310/ATCG00470/AT1G17890/AT5G65860/AT1G62430/AT5G15950/AT5G03690/AT1G52710/AT3G21070/AT4G26510/AT4G26910/AT1G10700/AT5G55070/AT3G24090/AT2G48130/AT3G51160/AT3G02470/AT5G44480/AT2G41880/AT3G47950/AT3G55410/AT1G32200/AT5G13450/AT2G27490/ATCG00480/AT1G17410…
GO:1903047	mitotic cell cycle process	115	0.335336	1.32389	0.0532544	0.456143	5990	tags=45%, list=29%, signal=32%	AT2G42290/AT1G05560/AT1G67510/AT1G13448/AT4G04180/AT2G01210/AT4G31400/AT2G21770/AT4G24860/AT5G44030/AT4G34160/AT2G32530/AT5G48600/AT1G69400/AT4G18780/AT1G55850/AT3G57830/AT4G23990/AT2G32590/AT1G49910/AT1G67630/AT4G24000/AT5G06680/AT5G17420/AT4G30870/AT2G23430/AT2G32540/AT3G25100/AT5G18700/AT3G54180/AT5G51340/AT3G49650/AT5G07590/AT1G04750/AT2G35630/AT3G03120/AT1G76540/AT3G54670/AT3G23890/AT4G09550…
GO:0015171	amino acid transmembrane transporter activity	66	0.381584	1.37545	0.0533333	0.456143	2237	tags=26%, list=11%, signal=23%	AT4G38250/AT4G16160/AT1G31820/AT1G25530/AT3G28960/AT2G37460/AT2G34960/AT1G01070/AT2G38120/AT4G01430/AT2G21050/AT2G39890/AT1G77690/AT4G08290/AT3G54830/AT2G37450/AT4G08300
GO:0006261	DNA-dependent DNA replication	40	0.434955	1.44027	0.053528	0.456143	3460	tags=28%, list=17%, signal=23%	AT3G50630/AT1G14460/AT1G79030/AT4G24790/AT1G15570/AT4G18820/AT2G29680/AT5G45720/AT2G02480/AT1G69690/AT3G54180
GO:0061134	peptidase regulator activity	23	-0.545118	-1.47279	0.0535406	0.456143	3794	tags=48%, list=19%, signal=39%	AT2G26590/AT2G43120/AT5G47550/AT5G43580/AT2G38870/AT2G26390/AT2G43510/AT2G43520/AT1G73260/AT4G16500
GO:0000302	response to reactive oxygen species	147	-0.351475	-1.31602	0.0537482	0.456583	2784	tags=20%, list=14%, signal=18%	AT5G05410/AT1G34190/AT1G16420/AT5G63160/AT3G10985/AT1G08830/AT2G29500/AT1G19570/AT1G07890/AT2G26150/AT1G77420/AT2G39770/AT5G46350/AT4G12400/AT5G24810/AT1G54050/AT5G10720/AT1G05347/AT3G56090/AT1G74310/AT2G06050/AT5G67490/AT3G12580/AT1G73260/AT4G21830/AT2G46240/AT5G67480/AT5G52310/AT1G61120
GO:0015631	tubulin binding	149	0.317007	1.29893	0.0538721	0.456583	6305	tags=46%, list=31%, signal=32%	AT4G17220/AT5G23430/AT5G62580/AT2G07170/AT4G24860/AT3G10310/AT1G14690/AT1G18410/AT2G33990/AT1G21730/AT3G15050/AT2G21300/AT1G11160/AT5G06680/AT5G47820/AT1G27920/AT2G14825/AT1G14840/AT4G27060/AT4G26660/AT5G18700/AT3G20150/AT3G44050/AT5G54670/AT3G51150/AT2G26180/AT5G06670/AT3G16060/AT2G01750/AT1G63640/AT4G26760/AT1G61210/AT3G49650/AT3G52290/AT2G20190/AT5G02370/AT2G35630/AT2G22610/AT4G14330/AT5G40740…
GO:0009615	response to virus	89	0.356197	1.34554	0.0544413	0.457342	3309	tags=22%, list=16%, signal=19%	AT4G32208/AT3G22640/AT4G14390/AT1G69440/AT1G19320/AT5G43810/AT3G49860/AT1G05460/AT4G14400/AT4G03450/AT4G03500/AT1G31290/AT5G24590/AT2G37630/AT4G05040/AT1G21250/AT1G16030/AT5G06320/AT1G14790/AT5G16000
GO:0051186	cofactor metabolic process	436	-0.297728	-1.22949	0.0544794	0.457342	4840	tags=26%, list=24%, signal=20%	AT1G10360/AT2G38040/AT4G01660/AT2G18980/AT4G04770/AT1G60440/AT4G08390/AT2G38660/AT3G55040/AT2G30970/AT2G38210/AT5G41220/AT1G17170/AT5G15180/AT4G37520/AT4G33790/AT5G15910/AT3G24030/AT2G02930/AT1G66340/AT5G02790/AT1G29810/AT5G56640/AT5G51890/AT2G44520/AT1G05260/AT1G69740/AT5G28840/AT1G02920/AT5G65860/AT2G30920/AT2G38230/AT1G64060/AT4G23100/AT3G21070/AT1G04620/AT2G36880/AT4G26910/AT1G78370/AT5G55070…
GO:0006568	tryptophan metabolic process	25	-0.532549	-1.47667	0.0546075	0.457342	3817	tags=44%, list=19%, signal=36%	AT5G17990/AT4G31500/AT5G05730/AT1G69370/AT2G22330/AT2G04400/AT3G55840/AT5G05590/AT5G60890/AT5G28237
GO:0006586	indolalkylamine metabolic process	25	-0.532549	-1.47667	0.0546075	0.457342	3817	tags=44%, list=19%, signal=36%	AT5G17990/AT4G31500/AT5G05730/AT1G69370/AT2G22330/AT2G04400/AT3G55840/AT5G05590/AT5G60890/AT5G28237
GO:0030162	regulation of proteolysis	59	-0.432364	-1.38988	0.0546624	0.457342	871	tags=14%, list=4%, signal=13%	AT3G27220/AT2G30600/AT1G15670/AT1G14330/AT5G67480/AT4G16500/AT4G19700
GO:0015267	channel activity	129	0.333162	1.33522	0.0550459	0.458201	2947	tags=22%, list=15%, signal=19%	AT3G12030/AT1G17810/AT1G73190/AT4G16160/AT2G25600/AT1G27770/AT4G22200/AT5G12080/AT4G35290/AT2G29100/AT5G66650/AT2G46440/AT5G33280/AT2G48060/AT1G05200/AT1G07430/AT3G02850/AT4G10380/AT5G14870/AT4G01470/AT3G51480/AT4G01840/AT2G29110/AT1G19780/AT4G23400/AT5G48400/AT5G46240/AT5G54250/AT4G35920
GO:0022803	passive transmembrane transporter activity	129	0.333162	1.33522	0.0550459	0.458201	2947	tags=22%, list=15%, signal=19%	AT3G12030/AT1G17810/AT1G73190/AT4G16160/AT2G25600/AT1G27770/AT4G22200/AT5G12080/AT4G35290/AT2G29100/AT5G66650/AT2G46440/AT5G33280/AT2G48060/AT1G05200/AT1G07430/AT3G02850/AT4G10380/AT5G14870/AT4G01470/AT3G51480/AT4G01840/AT2G29110/AT1G19780/AT4G23400/AT5G48400/AT5G46240/AT5G54250/AT4G35920
GO:0009737	response to abscisic acid	389	-0.304438	-1.24977	0.0553506	0.459565	2732	tags=19%, list=13%, signal=17%	AT5G28770/AT1G52400/AT5G45820/AT3G47620/AT2G36890/AT1G55870/AT4G34710/AT1G08930/AT4G35100/AT5G52660/AT4G25000/AT3G57120/AT3G07370/AT5G41790/AT2G41230/AT1G76180/AT3G07360/AT2G32690/AT5G14920/AT4G18010/AT3G21780/AT3G28210/AT3G59220/AT2G42540/AT3G61890/AT1G18100/AT4G23600/AT5G46350/AT3G02880/AT1G75750/AT4G34240/AT4G39260/AT4G34990/AT5G59550/AT1G49950/AT5G65160/AT1G12420/AT3G11410/AT5G35750/AT5G40390…
GO:0031497	chromatin assembly	10	0.648618	1.53732	0.0556745	0.460615	6720	tags=80%, list=33%, signal=54%	AT5G64630/AT4G39100/AT1G65470/AT3G15120/AT5G16940/AT1G57820/AT5G18620/AT4G22140
GO:0006575	cellular modified amino acid metabolic process	116	-0.374989	-1.35475	0.0558912	0.460615	5735	tags=40%, list=28%, signal=29%	AT2G32160/AT1G74920/AT3G24170/AT1G74710/AT4G13890/AT4G39650/AT4G24830/AT1G75170/AT2G46110/AT5G26220/AT1G10360/AT2G38660/AT3G55040/AT5G41220/AT1G17170/AT2G02930/AT5G02790/AT1G02920/AT5G65860/AT4G23100/AT1G78370/AT1G44790/AT1G49860/AT1G17190/AT1G02930/AT1G36370/AT1G78660/AT5G27380/AT4G02520/AT2G47730/AT5G62480/AT2G30870/AT2G29420/AT1G18870/AT3G62760/AT1G19570/AT2G29470/AT3G09270/AT2G29490/AT2G29460…
GO:0005996	monosaccharide metabolic process	143	-0.350194	-1.30639	0.0559541	0.460615	4567	tags=27%, list=22%, signal=21%	AT2G44500/AT1G09780/AT2G47180/AT5G56640/AT5G42740/AT5G28840/AT5G54060/AT1G14020/AT5G03690/AT1G38065/AT3G54050/AT3G02250/AT5G44480/AT4G30440/AT1G09420/AT1G20550/AT2G46750/AT1G76270/AT3G55440/AT1G52630/AT4G10960/AT1G78050/AT5G35570/AT5G26120/AT2G39770/AT1G22460/AT2G34850/AT3G05320/AT3G23820/AT5G65690/AT1G14520/AT5G66150/AT5G15650/AT2G20370/AT1G11990/AT5G65470/AT2G46740/AT2G19800
GO:0055072	iron ion homeostasis	39	0.437688	1.43433	0.0565111	0.460615	2938	tags=31%, list=14%, signal=26%	AT3G56980/AT4G16370/AT5G04150/AT4G34600/AT5G24380/AT2G41240/AT3G47640/AT5G53550/AT1G60960/AT1G58340/AT3G56970/AT3G08040
GO:0009404	toxin metabolic process	60	-0.43079	-1.38706	0.0565428	0.460615	4496	tags=52%, list=22%, signal=40%	AT1G17170/AT2G02930/AT2G02390/AT5G43780/AT1G02920/AT4G23100/AT4G39940/AT1G78370/AT1G49860/AT1G17190/AT1G02930/AT2G22330/AT4G02520/AT2G14750/AT2G47730/AT5G62480/AT4G14680/AT2G30870/AT2G29420/AT3G62760/AT2G29470/AT3G09270/AT2G29490/AT2G29460/AT4G30530/AT1G69930/AT1G10370/AT1G69920/AT2G29450/AT2G29440
GO:0009641	shade avoidance	14	-0.624595	-1.50052	0.0569395	0.460615	619	tags=43%, list=3%, signal=42%	AT3G58850/AT2G46970/AT4G16780/AT4G25260/AT2G42870
GO:0009723	response to ethylene	143	-0.349924	-1.30539	0.0573888	0.460615	2327	tags=18%, list=11%, signal=16%	AT5G52660/AT2G41230/AT3G51550/AT4G16110/AT2G01930/AT3G15356/AT4G33720/AT4G34990/AT2G25490/AT3G51450/AT5G59780/AT1G49950/AT2G13960/AT3G62680/AT2G34080/AT4G36010/AT3G06490/AT1G54260/AT3G16350/AT5G17490/AT5G44420/AT5G56840/AT3G59900/AT4G05100/AT5G25350
GO:0019199	transmembrane receptor protein kinase activity	176	0.306103	1.28396	0.0574324	0.460615	4230	tags=39%, list=21%, signal=31%	AT1G65800/AT4G30520/AT2G01950/AT5G47070/AT5G20480/AT4G28490/AT2G01830/AT4G35030/AT3G45410/AT5G23170/AT3G05140/AT3G08760/AT1G21590/AT2G41820/AT1G77280/AT1G60800/AT2G33580/AT4G21380/AT1G72540/AT4G34440/AT3G09780/AT1G69790/AT2G42960/AT1G20650/AT5G06820/AT2G18890/AT3G13380/AT4G13190/AT5G46570/AT3G25560/AT2G05940/AT4G02010/AT3G59420/AT2G31880/AT1G24030/AT2G40270/AT2G28250/AT3G13065/AT4G32000/AT3G01840…
GO:0016616	oxidoreductase activity, acting on the CH-OH group of donors, NAD or NADP as acceptor	140	0.325903	1.32387	0.057508	0.460615	1022	tags=8%, list=5%, signal=8%	AT1G54870/AT5G50600/AT5G50700/AT2G19900/AT4G37970/AT5G14700/AT2G21730/AT1G52340/AT1G71170/AT1G32780/AT5G56720
GO:0030414	peptidase inhibitor activity	21	-0.552404	-1.45226	0.0577933	0.460615	3042	tags=43%, list=15%, signal=36%	AT5G47550/AT5G43580/AT2G38870/AT2G26390/AT2G43510/AT2G43520/AT1G73260/AT4G16500
GO:0043102	amino acid salvage	10	0.640067	1.51705	0.0578158	0.460615	72	tags=10%, list=0%, signal=10%	AT2G26400
GO:0071267	L-methionine salvage	10	0.640067	1.51705	0.0578158	0.460615	72	tags=10%, list=0%, signal=10%	AT2G26400
GO:0070413	trehalose metabolism in response to stress	10	-0.665744	-1.44863	0.0579439	0.460615	1196	tags=50%, list=6%, signal=47%	AT1G23870/AT2G18700/AT1G06410/AT1G70290
GO:0016684	oxidoreductase activity, acting on peroxide as acceptor	111	-0.375367	-1.34694	0.058209	0.460615	2502	tags=23%, list=12%, signal=21%	AT5G66390/AT3G49120/AT3G63080/AT3G01190/AT2G47730/AT4G11290/AT1G05240/AT1G68850/AT3G03670/AT5G19880/AT1G07890/AT5G14130/AT5G05340/AT5G07390/AT5G64100/AT5G06720/AT5G17820/AT3G28200/AT5G51060/AT1G30870/AT1G05250/AT5G39580/AT4G26010/AT4G37530/AT1G14550
GO:0015893	drug transport	81	-0.40658	-1.3798	0.0582677	0.460615	1581	tags=16%, list=8%, signal=15%	AT1G11670/AT4G23030/AT1G15210/AT5G27520/AT1G15150/AT3G23550/AT5G09470/AT4G15230/AT4G09420/AT5G61810/AT1G12950/AT5G44050
GO:0008289	lipid binding	233	-0.321777	-1.26345	0.0584329	0.460615	4020	tags=25%, list=20%, signal=21%	AT1G70800/AT3G15730/AT3G44100/AT1G53320/AT5G37740/AT1G76900/AT1G30690/AT3G62770/AT5G27630/AT2G38540/AT4G35450/AT2G43160/AT5G44610/AT5G46880/AT1G06050/AT5G65020/AT2G25350/AT3G16785/AT5G22780/AT5G10750/AT5G57240/AT1G08860/AT3G56440/AT4G17870/AT1G25240/AT1G65480/AT1G72150/AT3G63010/AT5G22770/AT5G38160/AT1G76180/AT4G01026/AT5G48485/AT3G17980/AT3G43720/AT2G01540/AT2G42540/AT1G70790/AT2G40810/AT4G20260…
GO:0016667	oxidoreductase activity, acting on a sulfur group of donors	113	-0.373878	-1.34435	0.0584708	0.460615	6384	tags=40%, list=31%, signal=27%	AT3G06730/AT4G15700/AT3G15660/AT5G04590/AT4G15670/AT3G62930/AT4G21860/AT2G04700/AT3G08710/AT3G24170/AT1G06830/AT5G42980/AT5G42150/AT2G20270/AT1G50320/AT2G38960/AT4G12890/AT5G63030/AT1G08570/AT4G21990/AT4G04610/AT2G30540/AT1G77370/AT5G06470/AT2G47880/AT1G31020/AT5G40370/AT5G18600/AT1G59730/AT1G76080/AT5G07460/AT4G12870/AT5G14070/AT1G19570/AT5G58530/AT4G29670/AT3G53220/AT1G62180/AT4G15660/AT1G45145…
GO:0043085	positive regulation of catalytic activity	128	-0.362582	-1.33524	0.0587372	0.460615	4424	tags=23%, list=22%, signal=18%	AT4G08470/AT4G36950/AT2G35035/AT1G70800/AT5G37740/AT3G47940/AT1G05100/AT1G02410/AT4G11920/AT4G19600/AT4G08960/AT4G28480/AT5G15930/AT3G17980/AT2G01540/AT3G07980/AT3G07890/AT5G52580/AT1G70790/AT3G02460/AT4G28550/AT1G53570/AT3G13530/AT1G07150/AT4G27100/AT5G67080/AT4G26890/AT2G32510/AT5G55090
GO:0042545	cell wall modification	100	-0.384791	-1.3689	0.0588235	0.460615	2691	tags=37%, list=13%, signal=32%	AT3G43270/AT1G66340/AT3G11550/AT2G32700/AT5G51490/AT1G24100/AT3G06830/AT3G54920/AT4G33220/AT4G23100/AT3G10720/AT4G31500/AT1G11580/AT2G22330/AT2G26440/AT5G64640/AT1G53840/AT5G04310/AT5G20860/AT4G15980/AT4G03550/AT4G02320/AT1G53830/AT4G02330/AT5G06700/AT3G07160/AT4G30270/AT1G23200/AT2G36100/AT3G49220/AT2G27370/AT2G47550/AT2G18800/AT4G01630/AT5G46330/AT1G10550
GO:0009583	detection of light stimulus	65	-0.420623	-1.37268	0.0589172	0.460615	1815	tags=15%, list=9%, signal=14%	AT1G52520/AT5G41730/AT5G04190/AT5G61270/AT1G18810/AT1G02340/AT4G16780/AT1G14280/AT2G02950
GO:0090630	activation of GTPase activity	22	-0.545595	-1.45827	0.0589255	0.460615	2016	tags=27%, list=10%, signal=25%	AT3G07890/AT5G52580/AT3G02460/AT4G28550/AT4G27100
GO:0052325	cell wall pectin biosynthetic process	15	-0.615781	-1.49558	0.0589286	0.460615	2734	tags=40%, list=13%, signal=35%	AT3G25140/AT5G41040/AT1G78240/AT3G01040/AT2G40230
GO:0090627	plant epidermal cell differentiation	47	0.41016	1.38353	0.0589744	0.460615	3460	tags=40%, list=17%, signal=34%	AT4G37810/AT2G30370/AT1G05850/AT3G24140/AT2G38120/AT1G15570/AT4G34160/AT3G59420/AT5G03280/AT1G55350/AT5G46080/AT5G67260/AT4G30980/AT4G00730/AT5G64980/AT1G13980/AT1G14350/AT5G10310/AT3G54180
GO:0005874	microtubule	209	0.290275	1.23595	0.0590406	0.460615	6438	tags=45%, list=32%, signal=31%	AT4G17220/AT5G23430/AT1G13448/AT3G23090/AT5G62580/AT2G07170/AT4G24860/AT4G30710/AT4G23496/AT3G10310/AT1G14690/AT1G18410/AT2G33990/AT1G21730/AT3G15050/AT2G21300/AT1G11160/AT5G06680/AT1G54460/AT5G47820/AT3G27350/AT1G27920/AT2G14825/AT1G14840/AT4G27060/AT4G26660/AT1G77460/AT5G18700/AT3G20150/AT1G01510/AT3G44050/AT5G54670/AT3G51150/AT3G04630/AT1G70950/AT4G16520/AT2G26180/AT5G06670/AT3G16060/AT2G01750…
GO:0031060	regulation of histone methylation	23	0.510078	1.45871	0.0591017	0.460615	5596	tags=48%, list=28%, signal=35%	AT5G11470/AT3G24140/AT1G54440/AT1G14350/AT1G77300/AT4G18470/AT2G23740/AT5G28390/AT4G30200/AT3G44600/AT2G16390
GO:0019842	vitamin binding	129	-0.359555	-1.32394	0.0592593	0.460615	3482	tags=22%, list=17%, signal=19%	AT2G19590/AT5G19550/AT1G01480/AT2G22250/AT1G17290/AT4G33910/AT4G26200/AT2G38400/AT3G55410/AT1G05010/AT1G36370/AT4G14880/AT1G20270/AT3G48780/AT4G28410/AT2G20340/AT2G13810/AT1G77670/AT5G54960/AT4G23600/AT1G48740/AT1G71920/AT5G43660/AT3G48790/AT5G27200/AT4G37770/AT2G24850/AT4G33070
GO:0015291	secondary active transmembrane transporter activity	256	-0.31482	-1.24374	0.0592885	0.460615	2501	tags=17%, list=12%, signal=15%	AT5G63850/AT1G12600/AT1G08930/AT5G56450/AT5G23270/AT2G38290/AT1G66760/AT5G41610/AT4G36820/AT3G19930/AT3G01550/AT1G08890/AT5G40890/AT1G53210/AT2G23790/AT1G11670/AT4G23010/AT4G39030/AT3G05155/AT1G11260/AT4G23030/AT5G17850/AT3G47960/AT1G19450/AT4G13420/AT1G12110/AT1G09575/AT1G57610/AT5G27520/AT2G04040/AT1G61800/AT1G75220/AT1G15150/AT1G29025/AT5G01490/AT3G23550/AT5G17860/AT4G21680/AT5G09470/AT4G36670…
GO:0014070	response to organic cyclic compound	224	0.28933	1.24744	0.0597015	0.462722	1253	tags=17%, list=6%, signal=16%	AT2G40130/AT1G14950/AT4G23810/AT5G39860/AT4G33710/AT4G14390/AT2G46410/AT1G74660/AT1G14480/AT1G18570/AT5G24110/AT5G54610/AT3G61190/AT2G37710/AT1G06180/AT1G79180/AT3G50060/AT2G40530/AT4G14400/AT2G40750/AT1G66700/AT3G56400/AT3G46130/AT5G61420/AT4G23170/AT1G49010/AT2G26710/AT1G80840/AT5G59430/AT1G07200/AT1G15520/AT3G46590/AT1G05560/AT5G26230/AT4G03450/AT1G30570/AT5G07690
GO:0034605	cellular response to heat	32	-0.485101	-1.40514	0.0599315	0.463404	3881	tags=44%, list=19%, signal=35%	AT5G07350/AT5G12140/AT3G25230/AT5G48570/AT5G51070/AT1G21910/AT3G08970/AT3G19130/AT5G62390/AT2G26150/AT2G30250/AT5G61780/AT1G43160
GO:0006020	inositol metabolic process	18	-0.581319	-1.47361	0.0603908	0.465851	2233	tags=22%, list=11%, signal=20%	AT3G01640/AT1G14520/AT2G19800
GO:2000022	regulation of jasmonic acid mediated signaling pathway	27	-0.515294	-1.43448	0.0606586	0.466143	2799	tags=33%, list=14%, signal=29%	AT1G30135/AT2G34600/AT3G17860/AT1G74950/AT1G70700/AT1G72450/AT3G22275/AT5G13220
GO:0046688	response to copper ion	15	-0.608208	-1.47719	0.0607143	0.466143	2529	tags=53%, list=12%, signal=47%	AT2G28190/AT3G49340/AT1G08830/AT5G48100/AT5G45890/AT4G20260/AT5G01040
GO:0051495	positive regulation of cytoskeleton organization	32	-0.481597	-1.39499	0.0616438	0.471063	2173	tags=28%, list=11%, signal=25%	AT2G01330/AT3G25500/AT5G54650/AT4G20260/AT1G64110/AT1G70140/AT5G01730/AT5G52882
GO:1902905	positive regulation of supramolecular fiber organization	32	-0.481597	-1.39499	0.0616438	0.471063	2173	tags=28%, list=11%, signal=25%	AT2G01330/AT3G25500/AT5G54650/AT4G20260/AT1G64110/AT1G70140/AT5G01730/AT5G52882
GO:0022402	cell cycle process	282	0.277204	1.21936	0.0625	0.474096	6184	tags=41%, list=30%, signal=29%	AT2G42290/AT3G50630/AT2G13680/AT1G02730/AT2G19710/AT5G63540/AT1G05560/AT4G27595/AT1G15570/AT1G67510/AT1G13448/AT1G01690/AT4G04180/AT2G01210/AT4G31400/AT2G29680/AT2G21770/AT4G24860/AT5G44030/AT4G34160/AT2G32530/AT1G14690/AT1G28560/AT2G30820/AT1G20720/AT5G48600/AT3G21700/AT1G69400/AT4G18780/AT1G55850/AT3G09660/AT3G57830/AT1G64625/AT5G15920/AT3G18524/AT4G23990/AT2G32590/AT1G49910/AT1G67630/AT4G24000…
GO:0000428	DNA-directed RNA polymerase complex	61	0.379439	1.35073	0.0628272	0.474096	5139	tags=31%, list=25%, signal=23%	AT4G14520/AT2G15400/AT1G68990/AT5G10060/AT5G15700/AT1G63020/AT2G41340/AT1G67630/AT2G24120/AT3G57080/AT1G54250/AT1G06790/AT3G57660/AT3G25940/AT5G67100/AT1G03760/AT4G21670/AT3G23780/AT5G41880
GO:0030880	RNA polymerase complex	61	0.379439	1.35073	0.0628272	0.474096	5139	tags=31%, list=25%, signal=23%	AT4G14520/AT2G15400/AT1G68990/AT5G10060/AT5G15700/AT1G63020/AT2G41340/AT1G67630/AT2G24120/AT3G57080/AT1G54250/AT1G06790/AT3G57660/AT3G25940/AT5G67100/AT1G03760/AT4G21670/AT3G23780/AT5G41880
GO:0051052	regulation of DNA metabolic process	59	0.383511	1.36729	0.0631579	0.474096	4182	tags=27%, list=21%, signal=22%	AT5G36740/AT5G36670/AT5G11470/AT1G20870/AT4G04180/AT3G56790/AT1G15910/AT3G18524/AT1G24290/AT3G48360/AT1G05380/AT5G40820/AT5G59390/AT1G80210/AT5G63550/AT4G00380
GO:0043455	regulation of secondary metabolic process	46	-0.452495	-1.40229	0.0632091	0.474096	4325	tags=48%, list=21%, signal=38%	AT1G04770/AT5G65410/AT1G64670/AT5G07350/AT2G25450/AT1G68320/AT4G38620/AT3G23590/AT4G09820/AT3G26790/AT1G63030/AT3G27785/AT1G20780/AT1G12610/AT5G05340/AT5G20230/AT1G54540/AT3G59940/AT1G15670/AT5G61780/AT2G30830
GO:0009787	regulation of abscisic acid-activated signaling pathway	100	-0.380569	-1.35388	0.0633484	0.474096	4532	tags=36%, list=22%, signal=28%	AT1G70810/AT2G39550/AT4G06634/AT1G51940/AT1G70800/AT3G15730/AT5G37740/AT1G08720/AT5G11310/AT1G05100/AT1G69935/AT4G33950/AT1G52400/AT2G22430/AT1G24625/AT3G57120/AT5G41790/AT3G51550/AT3G17980/AT2G01540/AT1G10560/AT1G70790/AT5G65160/AT1G35670/AT3G11410/AT1G15100/AT5G10720/AT5G46590/AT1G51800/AT2G01150/AT3G02140/AT5G01810/AT2G41940/AT5G25160/AT5G64750
GO:0044843	cell cycle G1/S phase transition	15	0.576608	1.49371	0.0633484	0.474096	5637	tags=60%, list=28%, signal=43%	AT4G34160/AT1G67630/AT2G23430/AT3G25100/AT3G54180/AT1G76540/AT5G41880/AT2G38620/AT5G03415
GO:1901419	regulation of response to alcohol	100	-0.380569	-1.35388	0.0633484	0.474096	4532	tags=36%, list=22%, signal=28%	AT1G70810/AT2G39550/AT4G06634/AT1G51940/AT1G70800/AT3G15730/AT5G37740/AT1G08720/AT5G11310/AT1G05100/AT1G69935/AT4G33950/AT1G52400/AT2G22430/AT1G24625/AT3G57120/AT5G41790/AT3G51550/AT3G17980/AT2G01540/AT1G10560/AT1G70790/AT5G65160/AT1G35670/AT3G11410/AT1G15100/AT5G10720/AT5G46590/AT1G51800/AT2G01150/AT3G02140/AT5G01810/AT2G41940/AT5G25160/AT5G64750
GO:1905957	regulation of cellular response to alcohol	100	-0.380569	-1.35388	0.0633484	0.474096	4532	tags=36%, list=22%, signal=28%	AT1G70810/AT2G39550/AT4G06634/AT1G51940/AT1G70800/AT3G15730/AT5G37740/AT1G08720/AT5G11310/AT1G05100/AT1G69935/AT4G33950/AT1G52400/AT2G22430/AT1G24625/AT3G57120/AT5G41790/AT3G51550/AT3G17980/AT2G01540/AT1G10560/AT1G70790/AT5G65160/AT1G35670/AT3G11410/AT1G15100/AT5G10720/AT5G46590/AT1G51800/AT2G01150/AT3G02140/AT5G01810/AT2G41940/AT5G25160/AT5G64750
GO:0000987	proximal promoter sequence-specific DNA binding	20	0.546074	1.52832	0.0636364	0.475161	5078	tags=55%, list=25%, signal=41%	AT2G46400/AT5G26630/AT1G31760/AT5G48670/AT5G06550/AT1G59930/AT2G35605/AT2G16910/AT1G69540/AT1G72440/AT1G59920
GO:0010948	negative regulation of cell cycle process	23	0.507312	1.4508	0.0638298	0.475517	3299	tags=35%, list=16%, signal=29%	AT1G29770/AT1G13448/AT1G69400/AT3G18524/AT3G15150/AT1G49910/AT4G30870/AT2G18290
GO:0007602	phototransduction	59	-0.425774	-1.36869	0.0643087	0.476907	1815	tags=15%, list=9%, signal=14%	AT1G52520/AT5G04190/AT5G61270/AT1G18810/AT1G02340/AT4G16780/AT1G14280/AT2G02950
GO:0009585	red, far-red light phototransduction	59	-0.425774	-1.36869	0.0643087	0.476907	1815	tags=15%, list=9%, signal=14%	AT1G52520/AT5G04190/AT5G61270/AT1G18810/AT1G02340/AT4G16780/AT1G14280/AT2G02950
GO:0090698	post-embryonic plant morphogenesis	68	0.371187	1.34294	0.0648649	0.477692	3354	tags=31%, list=17%, signal=26%	AT5G28490/AT4G18610/AT4G28490/AT2G31160/AT3G23290/AT1G73590/AT1G68130/AT1G78815/AT5G07180/AT2G31290/AT1G69780/AT1G07090/AT3G59420/AT2G41370/AT5G02030/AT5G46080/AT2G01940/AT4G14550/AT5G27320/AT1G01510/AT5G46910
GO:0046983	protein dimerization activity	485	-0.291674	-1.21256	0.0649819	0.477692	2748	tags=16%, list=14%, signal=15%	AT5G28770/AT1G49770/AT5G51070/AT4G00570/AT5G27380/AT3G58850/AT4G08960/AT3G28180/AT5G41315/AT4G17870/AT2G32550/AT3G09260/AT5G02570/AT1G24625/AT5G50960/AT4G09820/AT3G62420/AT4G26750/AT5G57150/AT4G24660/AT5G08190/AT4G01026/AT1G09250/AT5G02200/AT1G14687/AT5G53810/AT2G43140/AT1G10120/AT1G71692/AT3G49250/AT4G19003/AT5G65080/AT2G18160/AT2G39180/AT2G18300/AT5G61270/AT4G35160/AT3G05800/AT5G57780/AT5G51790…
GO:0000152	nuclear ubiquitin ligase complex	15	0.572171	1.48221	0.0656109	0.477692	4419	tags=47%, list=22%, signal=37%	AT1G04020/AT3G48150/AT5G44280/AT2G18290/AT3G05870/AT3G63270/AT4G21530
GO:0031570	DNA integrity checkpoint	15	0.574789	1.489	0.0656109	0.477692	3875	tags=40%, list=19%, signal=32%	AT3G01600/AT1G20720/AT4G30870/AT3G25100/AT1G80210/AT1G02970
GO:0009664	plant-type cell wall organization	78	-0.405855	-1.36967	0.065625	0.477692	2448	tags=26%, list=12%, signal=23%	AT3G01190/AT4G11290/AT1G05240/AT3G03670/AT5G06700/AT4G30270/AT3G28550/AT3G54590/AT5G64100/AT3G54580/AT5G17820/AT1G23720/AT1G30870/AT1G05250/AT5G39580/AT4G26010/AT4G01630/AT1G10550/AT3G15370
GO:1901505	carbohydrate derivative transmembrane transporter activity	57	-0.437082	-1.39942	0.0657051	0.477692	3176	tags=28%, list=16%, signal=24%	AT1G76670/AT4G05110/AT3G51870/AT1G14560/AT1G12600/AT5G07320/AT5G56450/AT3G01550/AT4G23010/AT3G47960/AT4G31600/AT5G27520/AT4G05120/AT1G61800/AT5G61810
GO:0070469	respirasome	18	-0.575991	-1.46011	0.0657194	0.477692	5652	tags=61%, list=28%, signal=44%	AT2G05215/AT2G44620/AT4G22260/AT5G05370/AT1G32350/ATMG00160/AT1G22840/AT4G10040/AT3G10860/ATMG00580
GO:0071265	L-methionine biosynthetic process	12	0.605403	1.48755	0.0657596	0.477692	72	tags=8%, list=0%, signal=8%	AT2G26400
GO:0052546	cell wall pectin metabolic process	20	-0.551462	-1.42313	0.0658363	0.477692	2734	tags=35%, list=13%, signal=30%	AT3G25140/AT3G29360/AT5G41040/AT1G78240/AT3G01040/AT2G40230
GO:0016114	terpenoid biosynthetic process	99	-0.382875	-1.36399	0.0662651	0.477692	1992	tags=18%, list=10%, signal=16%	AT3G61460/AT3G14530/AT5G07200/AT3G47190/AT5G58660/AT5G58750/AT3G29430/AT4G15340/AT4G36810/AT3G25820/AT1G49530/AT1G02400/AT3G03990/AT5G61780/AT5G48110/AT3G25180/AT1G61120
GO:0000162	tryptophan biosynthetic process	19	-0.556342	-1.43398	0.0663176	0.477692	3817	tags=53%, list=19%, signal=43%	AT4G27070/AT5G17990/AT4G31500/AT5G05730/AT1G69370/AT2G04400/AT5G05590/AT5G60890/AT5G28237
GO:0002020	protease binding	19	-0.557357	-1.4366	0.0663176	0.477692	4966	tags=63%, list=24%, signal=48%	AT1G16820/AT5G11710/AT2G20410/AT5G12140/AT5G02500/AT5G47550/AT3G09260/AT1G72150/AT1G22530/AT4G16500/AT3G09440
GO:0046219	indolalkylamine biosynthetic process	19	-0.556342	-1.43398	0.0663176	0.477692	3817	tags=53%, list=19%, signal=43%	AT4G27070/AT5G17990/AT4G31500/AT5G05730/AT1G69370/AT2G04400/AT5G05590/AT5G60890/AT5G28237
GO:0046910	pectinesterase inhibitor activity	49	-0.442455	-1.38493	0.0665584	0.478095	2691	tags=31%, list=13%, signal=27%	AT2G26440/AT5G64640/AT1G53840/AT5G20860/AT4G15980/AT4G02320/AT1G53830/AT4G02330/AT1G23200/AT3G49220/AT3G47380/AT5G62350/AT2G47550/AT5G62360
GO:0010229	inflorescence development	16	0.569409	1.49217	0.0666667	0.478095	4331	tags=44%, list=21%, signal=34%	AT2G27990/AT1G73590/AT3G45640/AT1G69690/AT3G21220/AT1G51660/AT2G33810
GO:1901616	organic hydroxy compound catabolic process	30	-0.486691	-1.38692	0.0671256	0.480331	4278	tags=43%, list=21%, signal=34%	AT2G02390/AT2G37040/AT1G19630/AT3G55440/AT3G51970/AT5G24530/AT4G18010/AT3G21780/AT4G10500/AT1G14520/AT4G10490/AT2G19800
GO:0044798	nuclear transcription factor complex	62	-0.419443	-1.35979	0.0674157	0.480485	1510	tags=18%, list=7%, signal=16%	AT3G19040/AT1G73690/AT4G22360/AT1G27720/AT5G51790/AT4G25410/AT4G25400/AT5G51780/AT1G62975/AT1G12540
GO:0006469	negative regulation of protein kinase activity	19	0.55293	1.50678	0.0675991	0.480485	2635	tags=42%, list=13%, signal=37%	AT3G50630/AT1G79030/AT2G20470/AT1G01760/AT5G63190/AT5G57050/AT2G32710/AT2G23430
GO:0033673	negative regulation of kinase activity	19	0.55293	1.50678	0.0675991	0.480485	2635	tags=42%, list=13%, signal=37%	AT3G50630/AT1G79030/AT2G20470/AT1G01760/AT5G63190/AT5G57050/AT2G32710/AT2G23430
GO:0015108	chloride transmembrane transporter activity	12	-0.642015	-1.47956	0.0677362	0.480485	1646	tags=33%, list=8%, signal=31%	AT5G40890/AT3G45700/AT3G27170
GO:0000217	DNA secondary structure binding	14	0.583054	1.47984	0.0681818	0.482597	6023	tags=71%, list=30%, signal=50%	AT4G02070/AT3G24320/AT2G26840/AT3G18524/AT3G10140/AT3G22880/AT1G07745/AT5G64520/AT2G19490/AT5G10950
GO:0033044	regulation of chromosome organization	83	0.342842	1.29335	0.0684932	0.482913	7712	tags=61%, list=38%, signal=38%	AT5G11470/AT3G24140/AT5G64910/AT1G13448/AT4G04180/AT1G54440/AT1G04020/AT1G69400/AT4G39100/AT1G49910/AT2G16485/AT3G48430/AT2G46980/AT3G48150/AT5G40820/AT3G25100/AT1G14350/AT3G15120/AT3G05870/AT1G77300/AT3G63270/AT4G18470/AT4G21530/AT2G23740/AT5G28390/AT5G16940/AT4G30200/AT5G39550/AT5G37055/AT1G66050/AT1G79280/AT3G44600/AT2G16390/AT4G24970/AT1G57820/AT1G05910/AT2G06210/AT4G36270/AT4G22140/AT5G10010…
GO:0051365	cellular response to potassium ion starvation	10	0.625276	1.482	0.0685225	0.482913	6	tags=10%, list=0%, signal=10%	AT4G05380
GO:0019207	kinase regulator activity	47	0.404364	1.36398	0.0692308	0.483388	1405	tags=17%, list=7%, signal=16%	AT3G27630/AT3G50630/AT5G02220/AT5G59360/AT1G08180/AT5G26230/AT2G28870/AT1G51355
GO:0016849	phosphorus-oxygen lyase activity	11	0.608639	1.46014	0.0692641	0.483388	35	tags=9%, list=0%, signal=9%	AT5G09400
GO:0001558	regulation of cell growth	71	-0.405449	-1.35187	0.0693374	0.483388	2455	tags=30%, list=12%, signal=26%	AT5G53000/AT4G32551/AT4G35730/AT2G41630/AT5G42350/AT5G24630/AT4G28410/AT1G02900/AT2G41230/AT3G51550/AT4G20260/AT1G64110/AT3G07160/AT1G35670/AT3G02170/AT3G13530/AT4G17470/AT5G52240/AT5G52882/AT1G05800
GO:0044262	cellular carbohydrate metabolic process	369	-0.299354	-1.22157	0.0694789	0.483388	3450	tags=22%, list=17%, signal=19%	AT3G54050/AT5G62220/AT3G06550/AT5G09870/AT5G65140/AT3G23920/AT1G71880/AT5G05170/AT5G49190/AT4G24260/AT5G44480/AT3G62720/AT4G17090/AT4G33950/AT4G01750/AT2G01850/AT3G25140/AT1G69830/AT1G71890/AT2G25540/AT3G55440/AT4G03210/AT1G32170/AT5G16760/AT5G41040/AT4G38300/AT1G12240/AT4G14130/AT2G22780/AT2G06850/AT5G48070/AT5G64740/AT1G65310/AT4G18010/AT4G39770/AT5G50750/AT3G01640/AT1G74380/AT2G39770/AT4G28320…
GO:0004311	farnesyltranstransferase activity	12	-0.639642	-1.47409	0.0695187	0.483388	5622	tags=75%, list=28%, signal=54%	AT2G23800/AT4G34640/AT2G44520/AT4G34650/AT3G14530/AT3G29430/AT4G36810/AT1G49530
GO:0030674	protein binding, bridging	26	0.492301	1.44249	0.0697115	0.483388	344	tags=8%, list=2%, signal=8%	AT4G15248/AT5G54470
GO:0045324	late endosome to vacuole transport	19	-0.552605	-1.42435	0.069808	0.483388	4660	tags=53%, list=23%, signal=41%	AT2G38410/AT2G26890/AT2G30330/AT1G32410/AT3G11530/AT5G16830/AT3G18820/AT4G19003/AT4G21560
GO:0009751	response to salicylic acid	150	0.308507	1.26973	0.07	0.483388	1387	tags=20%, list=7%, signal=19%	AT4G23810/AT4G33710/AT4G14390/AT2G46410/AT1G14480/AT1G18570/AT5G24110/AT5G54610/AT3G61190/AT2G37710/AT1G06180/AT1G79180/AT3G50060/AT2G40530/AT4G14400/AT2G40750/AT1G66700/AT3G56400/AT3G46130/AT5G61420/AT4G23170/AT1G49010/AT1G80840/AT5G59430/AT1G15520/AT3G46590/AT1G05560/AT4G03450/AT5G07690/AT4G03500
GO:1901988	negative regulation of cell cycle phase transition	15	0.565779	1.46566	0.0701357	0.483388	2607	tags=33%, list=13%, signal=29%	AT1G29770/AT1G13448/AT1G69400/AT1G49910/AT4G30870
GO:1901991	negative regulation of mitotic cell cycle phase transition	15	0.565779	1.46566	0.0701357	0.483388	2607	tags=33%, list=13%, signal=29%	AT1G29770/AT1G13448/AT1G69400/AT1G49910/AT4G30870
GO:0005851	eukaryotic translation initiation factor 2B complex	11	-0.653648	-1.46055	0.0703704	0.483388	6162	tags=73%, list=30%, signal=51%	AT2G40290/AT1G65220/AT5G05470/AT1G72340/AT4G18300/AT2G34970/AT2G44070
GO:0005834	heterotrimeric G-protein complex	10	0.616275	1.46066	0.0706638	0.483388	1671	tags=30%, list=8%, signal=28%	AT2G46380/AT4G01090/AT5G20635
GO:0070828	heterochromatin organization	10	0.615872	1.45971	0.0706638	0.483388	6720	tags=70%, list=33%, signal=47%	AT5G64630/AT4G39100/AT1G65470/AT5G16940/AT2G16390/AT1G57820/AT4G22140
GO:1905360	GTPase complex	10	0.616275	1.46066	0.0706638	0.483388	1671	tags=30%, list=8%, signal=28%	AT2G46380/AT4G01090/AT5G20635
GO:0010017	red or far-red light signaling pathway	38	-0.468763	-1.39926	0.0709459	0.484303	1815	tags=26%, list=9%, signal=24%	AT1G10470/AT1G52520/AT2G42540/AT5G15840/AT5G04190/AT2G46970/AT5G15960/AT4G16780/AT2G02950
GO:0015849	organic acid transport	98	0.32949	1.25625	0.0716418	0.485864	2237	tags=22%, list=11%, signal=20%	AT4G38250/AT4G24570/AT1G25530/AT3G28960/AT2G37460/AT1G01070/AT2G38120/AT5G23810/AT4G01430/AT1G15520/AT2G21050/AT1G24400/AT2G39890/AT1G77690/AT2G06925/AT4G08290/AT5G46110/AT5G52050/AT5G24920/AT3G54830/AT2G37450/AT4G08300
GO:0046942	carboxylic acid transport	98	0.32949	1.25625	0.0716418	0.485864	2237	tags=22%, list=11%, signal=20%	AT4G38250/AT4G24570/AT1G25530/AT3G28960/AT2G37460/AT1G01070/AT2G38120/AT5G23810/AT4G01430/AT1G15520/AT2G21050/AT1G24400/AT2G39890/AT1G77690/AT2G06925/AT4G08290/AT5G46110/AT5G52050/AT5G24920/AT3G54830/AT2G37450/AT4G08300
GO:0031050	dsRNA processing	33	0.450865	1.42425	0.0717703	0.485864	6272	tags=45%, list=31%, signal=31%	AT1G69440/AT3G20420/AT5G23080/AT1G63020/AT5G04290/AT3G20550/AT4G11130/AT1G14790/AT5G23570/AT1G24706/AT3G23780/AT1G09700/AT2G28380/AT3G43920/AT4G24500
GO:0070918	production of small RNA involved in gene silencing by RNA	33	0.450865	1.42425	0.0717703	0.485864	6272	tags=45%, list=31%, signal=31%	AT1G69440/AT3G20420/AT5G23080/AT1G63020/AT5G04290/AT3G20550/AT4G11130/AT1G14790/AT5G23570/AT1G24706/AT3G23780/AT1G09700/AT2G28380/AT3G43920/AT4G24500
GO:0010646	regulation of cell communication	295	-0.303438	-1.21534	0.0727041	0.489586	2800	tags=18%, list=14%, signal=16%	AT5G67300/AT1G30135/AT1G52400/AT5G66730/AT2G22430/AT2G32550/AT1G13460/AT1G24625/AT3G57120/AT1G66350/AT2G34600/AT3G63010/AT5G52200/AT5G41790/AT2G41230/AT1G74330/AT4G03110/AT3G51550/AT3G17980/AT2G01540/AT4G39070/AT1G10560/AT1G70790/AT3G23150/AT2G25490/AT5G65160/AT1G35670/AT3G11410/AT1G15100/AT3G17860/AT5G10720/AT4G17470/AT1G74950/AT1G70700/AT5G46590/AT1G51800/AT2G01150/AT1G72450/AT5G17490/AT3G02140…
GO:0090421	embryonic meristem initiation	20	0.532005	1.48894	0.0727273	0.489586	2551	tags=25%, list=13%, signal=22%	AT1G20700/AT4G32880/AT5G48160/AT3G15170/AT1G11130
GO:0010100	negative regulation of photomorphogenesis	10	0.613213	1.45341	0.0728051	0.489586	2191	tags=30%, list=11%, signal=27%	AT2G20180/AT2G21320/AT4G38960
GO:0009968	negative regulation of signal transduction	114	-0.368024	-1.32371	0.0735736	0.489586	2483	tags=19%, list=12%, signal=17%	AT2G32550/AT1G13460/AT1G24625/AT1G66350/AT3G51550/AT4G39070/AT3G23150/AT2G25490/AT3G11410/AT5G10720/AT1G51800/AT5G17490/AT3G02140/AT5G01810/AT2G41940/AT1G14920/AT3G59940/AT1G15670/AT5G25160/AT5G25350/AT5G64750
GO:0010332	response to gamma radiation	11	0.604779	1.45088	0.0735931	0.489586	5629	tags=55%, list=28%, signal=39%	AT3G01600/AT5G40820/AT4G37490/AT3G05210/AT3G19210/AT5G06150
GO:0019750	chloroplast localization	30	0.466799	1.43083	0.0736342	0.489586	3345	tags=40%, list=16%, signal=33%	AT1G66840/AT3G13190/AT1G42550/AT2G38370/AT1G07120/AT3G56270/AT2G40480/AT5G42880/AT3G45780/AT1G75720/AT1G52080/AT1G75100
GO:0051644	plastid localization	30	0.466799	1.43083	0.0736342	0.489586	3345	tags=40%, list=16%, signal=33%	AT1G66840/AT3G13190/AT1G42550/AT2G38370/AT1G07120/AT3G56270/AT2G40480/AT5G42880/AT3G45780/AT1G75720/AT1G52080/AT1G75100
GO:0006855	drug transmembrane transport	62	-0.413002	-1.33891	0.0738363	0.489586	1933	tags=16%, list=10%, signal=15%	AT1G11670/AT4G23030/AT1G15210/AT1G15150/AT3G23550/AT5G09470/AT4G15230/AT1G12950/AT5G44050
GO:0006270	DNA replication initiation	19	0.538941	1.46866	0.0745921	0.489586	5964	tags=74%, list=29%, signal=52%	AT2G29680/AT3G09660/AT4G29910/AT1G67630/AT3G25100/AT2G07690/AT1G44900/AT5G67100/AT4G02060/AT5G44635/AT5G41880/AT2G16440/AT5G46280/AT3G12530
GO:0004866	endopeptidase inhibitor activity	20	-0.545275	-1.40717	0.0747331	0.489586	2966	tags=40%, list=15%, signal=34%	AT5G43580/AT2G38870/AT2G26390/AT2G43510/AT2G43520/AT1G73260/AT4G16500
GO:0030173	integral component of Golgi membrane	14	-0.59848	-1.43778	0.0747331	0.489586	3029	tags=36%, list=15%, signal=30%	AT1G12600/AT4G23010/AT2G20370/AT5G16910
GO:0031228	intrinsic component of Golgi membrane	14	-0.59848	-1.43778	0.0747331	0.489586	3029	tags=36%, list=15%, signal=30%	AT1G12600/AT4G23010/AT2G20370/AT5G16910
GO:0009065	glutamine family amino acid catabolic process	10	-0.656776	-1.42912	0.0747664	0.489586	3902	tags=70%, list=19%, signal=57%	AT4G39660/AT2G16500/AT1G79440/AT4G34710/AT3G30775/AT5G38710
GO:0016363	nuclear matrix	10	-0.657845	-1.43144	0.0747664	0.489586	1940	tags=30%, list=10%, signal=27%	AT5G62520/AT3G09440
GO:0008170	N-methyltransferase activity	67	0.35995	1.29762	0.0748663	0.489586	5191	tags=40%, list=26%, signal=30%	AT3G18000/AT5G53430/AT2G31650/AT2G26810/AT2G21070/AT2G44150/AT5G04940/AT4G25630/AT2G35160/AT3G61740/AT4G15180/AT4G02020/AT1G14030/AT1G77300/AT1G73600/AT4G28020/AT1G01860/AT2G23740/AT3G20810/AT1G04050/AT1G80860/AT3G06930/AT5G49560/AT5G43990/AT3G12270/AT3G58470/AT4G31120
GO:0004568	chitinase activity	15	-0.592813	-1.4398	0.075	0.489586	2573	tags=60%, list=13%, signal=52%	AT4G01700/AT1G02360/AT4G19720/AT2G43570/AT4G19820/AT2G43610/AT2G43620/AT4G19810
GO:0051592	response to calcium ion	15	-0.596421	-1.44856	0.075	0.489586	3197	tags=33%, list=16%, signal=28%	AT5G07320/AT4G20260/AT4G14640/AT5G61810
GO:0010232	vascular transport	18	0.553214	1.48004	0.0751708	0.489586	789	tags=39%, list=4%, signal=37%	AT1G18880/AT5G04950/AT2G01950/AT4G16370/AT5G57130/AT5G01170/AT1G56430
GO:0010233	phloem transport	18	0.553214	1.48004	0.0751708	0.489586	789	tags=39%, list=4%, signal=37%	AT1G18880/AT5G04950/AT2G01950/AT4G16370/AT5G57130/AT5G01170/AT1G56430
GO:0008017	microtubule binding	136	0.318065	1.28791	0.0754717	0.490566	7220	tags=55%, list=36%, signal=36%	AT4G17220/AT5G23430/AT5G62580/AT2G07170/AT4G24860/AT3G10310/AT1G14690/AT1G18410/AT2G33990/AT1G21730/AT3G15050/AT2G21300/AT1G11160/AT5G47820/AT1G27920/AT2G14825/AT1G14840/AT4G27060/AT4G26660/AT5G18700/AT3G20150/AT3G44050/AT5G54670/AT3G51150/AT2G26180/AT5G06670/AT3G16060/AT2G01750/AT1G63640/AT4G26760/AT1G61210/AT3G49650/AT3G52290/AT2G20190/AT5G02370/AT2G35630/AT2G22610/AT4G14330/AT5G40740/AT5G17620…
GO:0010648	negative regulation of cell communication	115	-0.366543	-1.32058	0.0768072	0.496824	2483	tags=19%, list=12%, signal=17%	AT2G32550/AT1G13460/AT1G24625/AT1G66350/AT3G51550/AT4G39070/AT3G23150/AT2G25490/AT3G11410/AT5G10720/AT1G51800/AT5G17490/AT3G02140/AT5G01810/AT2G41940/AT1G14920/AT3G59940/AT1G15670/AT5G25160/AT5G25350/AT5G64750
GO:0023057	negative regulation of signaling	115	-0.366543	-1.32058	0.0768072	0.496824	2483	tags=19%, list=12%, signal=17%	AT2G32550/AT1G13460/AT1G24625/AT1G66350/AT3G51550/AT4G39070/AT3G23150/AT2G25490/AT3G11410/AT5G10720/AT1G51800/AT5G17490/AT3G02140/AT5G01810/AT2G41940/AT1G14920/AT3G59940/AT1G15670/AT5G25160/AT5G25350/AT5G64750
GO:0000082	G1/S transition of mitotic cell cycle	14	0.577643	1.46611	0.0772727	0.496824	5637	tags=64%, list=28%, signal=46%	AT4G34160/AT1G67630/AT2G23430/AT3G25100/AT3G54180/AT1G76540/AT5G41880/AT2G38620/AT5G03415
GO:0009902	chloroplast relocation	29	0.47175	1.43532	0.0772834	0.496824	3345	tags=41%, list=16%, signal=35%	AT1G66840/AT3G13190/AT1G42550/AT2G38370/AT1G07120/AT3G56270/AT2G40480/AT5G42880/AT3G45780/AT1G75720/AT1G52080/AT1G75100
GO:0051667	establishment of plastid localization	29	0.47175	1.43532	0.0772834	0.496824	3345	tags=41%, list=16%, signal=35%	AT1G66840/AT3G13190/AT1G42550/AT2G38370/AT1G07120/AT3G56270/AT2G40480/AT5G42880/AT3G45780/AT1G75720/AT1G52080/AT1G75100
GO:0006259	DNA metabolic process	418	0.252549	1.16192	0.0773481	0.496824	6359	tags=38%, list=31%, signal=27%	AT5G36740/AT5G36670/AT5G22470/AT1G17460/AT1G14460/AT5G59430/AT4G24790/AT3G46590/AT4G27595/AT4G31400/AT2G24250/AT4G02070/AT4G18820/AT2G29680/AT3G24320/AT2G21800/AT2G26840/AT1G54440/AT1G04020/AT1G15910/AT1G20720/AT4G02390/AT5G01780/AT4G31150/AT5G64630/AT3G09660/AT3G20820/AT5G15920/AT5G27680/AT3G10010/AT3G18524/AT3G15150/AT1G24290/AT3G27060/AT3G10140/AT4G29910/AT1G65470/AT1G67630/AT4G10180/AT5G54260…
GO:1905393	plant organ formation	65	0.365011	1.30993	0.0775401	0.497079	3229	tags=42%, list=16%, signal=35%	AT3G18550/AT3G24300/AT1G73870/AT5G61480/AT2G27990/AT1G73590/AT1G21590/AT2G38120/AT1G15570/AT3G24420/AT1G77690/AT4G02010/AT3G59420/AT2G41370/AT1G28560/AT2G18480/AT5G02030/AT3G14067/AT2G37630/AT2G26170/AT3G15170/AT5G46080/AT4G37470/AT2G23430/AT1G21410/AT5G49660/AT1G13980
GO:0044264	cellular polysaccharide metabolic process	261	-0.305122	-1.2102	0.0780234	0.498382	3359	tags=22%, list=17%, signal=19%	AT3G06550/AT5G09870/AT3G23920/AT5G05170/AT5G49190/AT4G24260/AT5G44480/AT3G62720/AT4G17090/AT4G01750/AT2G01850/AT3G25140/AT1G69830/AT2G25540/AT4G03210/AT1G32170/AT5G41040/AT4G38300/AT4G14130/AT2G06850/AT5G48070/AT5G64740/AT1G65310/AT5G50750/AT1G74380/AT2G39770/AT4G28320/AT4G03550/AT2G34850/AT3G03050/AT4G30290/AT3G08900/AT1G70230/AT5G06700/AT1G78240/AT1G48930/AT3G07160/AT4G30270/AT4G33820/AT5G63240…
GO:0022890	inorganic cation transmembrane transporter activity	327	0.267562	1.19593	0.0780488	0.498382	3108	tags=18%, list=15%, signal=15%	AT3G12030/AT5G09400/AT1G76800/AT3G46900/AT1G05300/AT2G30080/AT5G59520/AT4G16370/AT2G37925/AT2G25600/AT1G27770/AT4G22200/AT3G53720/AT4G35290/AT5G14880/AT2G29100/AT2G03590/AT5G66650/AT2G38170/AT2G46440/AT1G10970/AT1G55910/AT1G80660/AT2G48060/AT1G05200/AT1G07430/AT2G26975/AT5G13740/AT3G14070/AT3G02850/AT3G51860/AT2G40540/AT5G27150/AT1G70300/AT2G18480/AT2G19110/AT5G14870/AT1G21140/AT1G60960/AT3G51480…
GO:0002831	regulation of response to biotic stimulus	187	0.285843	1.20095	0.0785714	0.499125	2972	tags=19%, list=15%, signal=17%	AT1G32640/AT4G14465/AT1G02450/AT4G14390/AT3G24900/AT5G20480/AT1G47890/AT5G26920/AT2G33020/AT4G14400/AT1G79030/AT3G56400/AT1G73805/AT4G13810/AT3G18690/AT4G03450/AT1G20160/AT1G20900/AT4G03500/AT1G32540/AT5G47220/AT4G04920/AT2G41370/AT5G24590/AT3G26830/AT2G37630/AT3G52430/AT3G51480/AT3G56410/AT3G01310/AT4G13880/AT5G18650/AT3G28890/AT5G39420/AT4G05040/AT1G03830
GO:0007034	vacuolar transport	71	-0.399157	-1.33089	0.0785824	0.499125	5354	tags=41%, list=26%, signal=30%	AT3G47810/AT3G47700/AT1G73030/AT5G39510/AT4G19640/AT5G11710/AT1G80310/AT2G38410/AT5G50440/AT2G26890/AT2G30330/AT1G03950/AT5G45130/AT1G32410/AT3G11530/AT1G09070/AT3G17440/AT1G17730/AT4G29160/AT5G16830/AT4G02195/AT4G35870/AT3G18820/AT4G19003/AT4G21560/AT5G09260/AT1G42470/AT3G16690
GO:0008284	positive regulation of cell population proliferation	37	0.430036	1.38872	0.0786241	0.499125	4746	tags=41%, list=23%, signal=31%	AT1G79030/AT5G64770/AT4G32880/AT5G49430/AT5G59340/AT4G26600/AT4G37110/AT3G15150/AT4G10090/AT3G04740/AT3G54180/AT2G42240/AT4G16515/AT2G33880/AT1G76540
GO:0022898	regulation of transmembrane transporter activity	17	-0.565831	-1.4176	0.0792254	0.500024	3536	tags=47%, list=17%, signal=39%	AT4G33950/AT2G17290/AT4G23650/AT1G09995/AT1G35670/AT3G11410/AT5G46330
GO:0032409	regulation of transporter activity	17	-0.565831	-1.4176	0.0792254	0.500024	3536	tags=47%, list=17%, signal=39%	AT4G33950/AT2G17290/AT4G23650/AT1G09995/AT1G35670/AT3G11410/AT5G46330
GO:0032412	regulation of ion transmembrane transporter activity	17	-0.565831	-1.4176	0.0792254	0.500024	3536	tags=47%, list=17%, signal=39%	AT4G33950/AT2G17290/AT4G23650/AT1G09995/AT1G35670/AT3G11410/AT5G46330
GO:0071489	cellular response to red or far red light	40	-0.46349	-1.39092	0.0795262	0.500954	1815	tags=25%, list=9%, signal=23%	AT1G10470/AT1G52520/AT2G42540/AT5G15840/AT5G04190/AT2G46970/AT5G15960/AT4G16780/AT2G02950
GO:0016053	organic acid biosynthetic process	456	-0.287914	-1.18989	0.0799031	0.501392	4816	tags=27%, list=24%, signal=21%	AT1G04580/AT2G38040/AT5G15490/AT1G04710/AT5G03730/AT1G08510/AT1G66430/AT3G06850/AT1G26570/AT1G04700/AT4G13430/AT3G13110/AT5G54810/AT1G07780/AT5G14200/AT3G29200/AT1G09795/AT4G34520/AT5G56640/AT4G21990/AT1G17420/AT3G16170/AT5G28840/AT5G57610/AT2G19940/AT3G22400/AT1G64670/AT4G04610/AT5G66120/AT2G04240/AT4G13050/AT1G02860/AT4G27070/AT4G24510/AT1G11790/AT2G37040/AT3G20390/AT5G16390/AT3G29160/AT5G17990…
GO:0046394	carboxylic acid biosynthetic process	456	-0.287914	-1.18989	0.0799031	0.501392	4816	tags=27%, list=24%, signal=21%	AT1G04580/AT2G38040/AT5G15490/AT1G04710/AT5G03730/AT1G08510/AT1G66430/AT3G06850/AT1G26570/AT1G04700/AT4G13430/AT3G13110/AT5G54810/AT1G07780/AT5G14200/AT3G29200/AT1G09795/AT4G34520/AT5G56640/AT4G21990/AT1G17420/AT3G16170/AT5G28840/AT5G57610/AT2G19940/AT3G22400/AT1G64670/AT4G04610/AT5G66120/AT2G04240/AT4G13050/AT1G02860/AT4G27070/AT4G24510/AT1G11790/AT2G37040/AT3G20390/AT5G16390/AT3G29160/AT5G17990…
GO:0015175	neutral amino acid transmembrane transporter activity	16	0.55915	1.46528	0.0804598	0.501658	1479	tags=25%, list=7%, signal=23%	AT4G38250/AT1G01070/AT4G01430/AT2G39890
GO:0015926	glucosidase activity	112	-0.363906	-1.30854	0.0804769	0.501658	4398	tags=36%, list=22%, signal=28%	AT1G11820/AT5G42100/AT3G13790/AT1G45191/AT5G22510/AT3G52600/AT3G03640/AT4G18340/AT1G02850/AT1G60260/AT2G26600/AT1G09460/AT1G61820/AT4G21760/AT1G78520/AT1G52400/AT3G09260/AT3G60130/AT1G66270/AT3G55430/AT1G12240/AT5G49900/AT3G07320/AT3G57270/AT3G06500/AT2G44470/AT2G44450/AT5G55180/AT5G63240/AT1G51470/AT1G66280/AT1G62660/AT1G47600/AT3G60120/AT1G60270/AT4G26830/AT3G57260/AT3G04010/AT5G28510
GO:0009631	cold acclimation	46	0.398604	1.33537	0.0805195	0.501658	1330	tags=20%, list=7%, signal=18%	AT4G25490/AT1G56070/AT4G25470/AT2G21490/AT4G36020/AT5G59820/AT2G38170/AT2G03740/AT5G66400
GO:0061135	endopeptidase regulator activity	21	-0.540545	-1.42108	0.0805604	0.501658	3794	tags=48%, list=19%, signal=39%	AT2G26590/AT5G47550/AT5G43580/AT2G38870/AT2G26390/AT2G43510/AT2G43520/AT1G73260/AT4G16500
GO:0072330	monocarboxylic acid biosynthetic process	215	-0.316152	-1.23035	0.0814917	0.50649	3960	tags=32%, list=19%, signal=26%	AT2G46110/AT2G45690/AT5G08415/AT2G20610/AT1G67560/AT4G34510/AT1G04580/AT2G38040/AT1G04710/AT1G08510/AT1G66430/AT3G06850/AT5G54810/AT4G34520/AT1G17420/AT3G16170/AT3G22400/AT1G64670/AT2G04240/AT4G13050/AT1G02860/AT4G24510/AT2G37040/AT5G16390/AT3G29160/AT1G16400/AT2G46720/AT2G31360/AT4G30440/AT3G10280/AT4G31500/AT4G33950/AT1G16410/AT2G28630/AT1G25450/AT1G06360/AT5G43760/AT2G22330/AT4G34250/AT1G13580…
GO:0030422	production of siRNA involved in RNA interference	26	0.478461	1.40194	0.0817308	0.50701	6272	tags=46%, list=31%, signal=32%	AT1G69440/AT3G20420/AT5G23080/AT1G63020/AT5G04290/AT4G11130/AT1G14790/AT5G23570/AT3G23780/AT1G09700/AT3G43920/AT4G24500
GO:0042593	glucose homeostasis	12	-0.628007	-1.44728	0.0819964	0.507693	2716	tags=33%, list=13%, signal=29%	AT3G20040/AT1G75220/AT1G50460
GO:0010371	regulation of gibberellin biosynthetic process	10	-0.648503	-1.41112	0.082243	0.508255	4141	tags=70%, list=20%, signal=56%	AT5G07350/AT1G68320/AT3G26790/AT1G63030/AT1G12610/AT5G61780
GO:1902288	regulation of defense response to oomycetes	38	0.422469	1.37845	0.0829268	0.511513	3802	tags=37%, list=19%, signal=30%	AT4G14390/AT3G24900/AT1G47890/AT2G33020/AT4G14400/AT4G13810/AT4G03450/AT4G03500/AT4G13880/AT5G39420/AT4G05040/AT3G11080/AT4G13820/AT3G24982
GO:2000023	regulation of lateral root development	10	0.599335	1.42051	0.0835118	0.513906	3344	tags=40%, list=16%, signal=33%	AT1G77110/AT1G77000/AT5G49660/AT1G14350
GO:0009501	amyloplast	13	-0.603939	-1.43315	0.0836299	0.513906	115	tags=31%, list=1%, signal=31%	AT4G31990/AT5G65685/AT5G02750
GO:0003714	transcription corepressor activity	37	-0.463462	-1.38238	0.0840336	0.515417	3963	tags=35%, list=20%, signal=28%	AT5G19490/AT3G47940/AT1G70060/AT1G30135/AT4G28480/AT2G34600/AT3G17860/AT1G74950/AT1G70700/AT1G72450/AT3G22275/AT5G13220
GO:0034219	carbohydrate transmembrane transport	52	-0.428204	-1.34706	0.0850722	0.520006	2395	tags=23%, list=12%, signal=20%	AT5G23270/AT3G19930/AT3G01550/AT1G08890/AT3G05155/AT1G11260/AT1G19450/AT1G61800/AT1G75220/AT3G16690/AT4G36670
GO:0030154	cell differentiation	340	0.266588	1.20429	0.0852018	0.520006	3558	tags=27%, list=18%, signal=22%	AT4G37810/AT1G63650/AT4G33450/AT1G32240/AT5G51870/AT2G46410/AT5G26660/AT3G50870/AT1G18570/AT1G67030/AT1G05470/AT1G63910/AT1G21590/AT1G06180/AT2G30370/AT1G79180/AT3G50060/AT5G16600/AT2G18380/AT1G79030/AT1G05850/AT5G64770/AT3G46130/AT4G21440/AT5G61420/AT3G24140/AT5G25830/AT2G38120/AT4G37750/AT4G32880/AT4G17695/AT5G66320/AT5G61850/AT1G15570/AT1G26780/AT1G17950/AT5G07690/AT5G05690/AT1G75820/AT5G49152…
GO:0046961	proton-transporting ATPase activity, rotational mechanism	20	-0.539541	-1.39237	0.0854093	0.520006	7425	tags=80%, list=37%, signal=51%	AT4G38920/AT3G42050/AT2G16510/AT5G55290/AT4G11150/AT2G21410/AT4G26710/AT4G39080/AT3G28710/AT1G78900/AT3G28715/AT1G19910/AT1G16820/AT4G02620/AT1G64200
GO:0010120	camalexin biosynthetic process	10	0.598742	1.41911	0.0856531	0.520006	2612	tags=50%, list=13%, signal=44%	AT2G38470/AT4G27260/AT3G45640/AT3G26830/AT2G43000
GO:0052317	camalexin metabolic process	10	0.598742	1.41911	0.0856531	0.520006	2612	tags=50%, list=13%, signal=44%	AT2G38470/AT4G27260/AT3G45640/AT3G26830/AT2G43000
GO:0010167	response to nitrate	21	-0.535546	-1.40794	0.0858144	0.520006	2819	tags=38%, list=14%, signal=33%	AT5G50200/AT1G12820/AT5G40890/AT1G12110/AT1G08090/AT4G21680/AT3G45060
GO:0005768	endosome	302	-0.300753	-1.20429	0.0858974	0.520006	4838	tags=28%, list=24%, signal=22%	AT1G16020/AT3G61130/AT3G12400/AT3G49720/AT2G22900/AT1G18630/AT2G20810/AT4G37690/AT5G39510/AT4G19640/AT5G11710/AT4G29140/AT3G62830/AT2G38410/AT1G71900/AT2G26890/AT3G14270/AT5G25250/AT2G30330/AT1G55830/AT3G66654/AT5G66120/AT3G23870/AT5G45550/AT4G16144/AT5G65270/AT4G08500/AT2G40280/AT5G45130/AT1G32410/AT1G08720/AT1G67330/AT3G11530/AT2G38360/AT2G40380/AT5G16830/AT5G05170/AT1G61250/AT4G30440/AT3G62720…
GO:0000919	cell plate assembly	12	0.592273	1.45529	0.0861678	0.520677	5798	tags=58%, list=29%, signal=42%	AT1G02730/AT1G05560/AT1G04750/AT2G35630/AT5G05970/AT3G24890/AT5G11040
GO:0033178	proton-transporting two-sector ATPase complex, catalytic domain	23	-0.51855	-1.40101	0.0863558	0.520848	8906	tags=83%, list=44%, signal=46%	AT5G08690/ATMG01190/AT5G47030/AT5G08670/ATCG00120/AT1G12840/AT3G42050/AT4G11150/AT1G51650/AT1G78900/AT2G33040/AT1G20260/AT1G16820/AT4G02620/AT2G07698/ATCG00470/ATCG00480/AT1G64200
GO:0051607	defense response to virus	47	0.391192	1.31955	0.0871795	0.524846	7456	tags=62%, list=37%, signal=39%	AT1G69440/AT5G43810/AT3G49860/AT1G05460/AT1G31290/AT5G24590/AT5G06320/AT5G16000/AT2G41020/AT3G11660/AT5G23570/AT3G11650/AT2G26560/AT5G40270/AT5G08120/AT5G37680/AT5G06330/AT1G04400/AT3G43920/AT5G42810/AT1G05760/AT1G57850/AT1G48410/AT4G20910/AT3G20250/AT5G43470/AT5G22200/AT3G58350/AT4G36290
GO:1902074	response to salt	15	-0.580545	-1.41	0.0875	0.525806	388	tags=20%, list=2%, signal=20%	AT5G52310/AT5G64750
GO:0003712	transcription coregulator activity	101	-0.365562	-1.29776	0.0882801	0.528607	4319	tags=27%, list=21%, signal=21%	AT4G00980/AT2G32700/AT1G24210/AT2G20410/AT5G19490/AT3G47940/AT1G70060/AT3G01435/AT2G14045/AT3G19040/AT1G30135/AT5G63160/AT4G28480/AT2G34600/AT5G09250/AT1G27720/AT3G17860/AT1G02340/AT1G74950/AT1G70700/AT1G72450/AT3G22275/AT5G13220/AT3G24500/AT2G42870/AT5G67480
GO:0005687	U4 snRNP	12	0.591273	1.45283	0.0884354	0.528607	202	tags=8%, list=1%, signal=8%	AT4G20440
GO:0051783	regulation of nuclear division	37	0.41924	1.35386	0.0884521	0.528607	2935	tags=27%, list=14%, signal=23%	AT3G01600/AT5G64910/AT1G13448/AT5G49430/AT3G21700/AT1G69400/AT3G18524/AT1G49910/AT2G46980/AT3G48150
GO:0007029	endoplasmic reticulum organization	11	-0.631409	-1.41085	0.0888889	0.529278	1769	tags=82%, list=9%, signal=75%	AT1G64090/AT4G11220/AT1G54030/AT4G14950/AT5G41600/AT4G23630/AT2G24330/AT2G22770
GO:0009909	regulation of flower development	138	0.30761	1.24773	0.0888889	0.529278	3454	tags=23%, list=17%, signal=19%	AT3G21150/AT4G15248/AT3G54720/AT5G51870/AT1G20823/AT5G54470/AT5G22290/AT3G50870/AT5G03680/AT1G06180/AT4G25530/AT2G31650/AT5G57520/AT5G05690/AT5G24860/AT1G75820/AT2G40080/AT5G56860/AT5G13290/AT2G22540/AT1G27320/AT1G68640/AT2G25930/AT2G30140/AT1G26260/AT1G66400/AT4G20400/AT5G62165/AT1G51570/AT4G04885/AT5G60800/AT5G24240
GO:0016645	oxidoreductase activity, acting on the CH-NH group of donors	30	-0.472272	-1.34583	0.0895009	0.531805	2242	tags=23%, list=11%, signal=21%	AT4G29740/AT3G63440/AT1G65840/AT1G75450/AT3G30775/AT5G38710
GO:0071249	cellular response to nitrate	10	-0.644596	-1.40262	0.0897196	0.531805	2819	tags=40%, list=14%, signal=34%	AT1G12820/AT1G08090/AT3G45060
GO:0008422	beta-glucosidase activity	94	-0.369736	-1.30151	0.0898021	0.531805	4398	tags=36%, list=22%, signal=28%	AT1G11820/AT5G42100/AT1G45191/AT3G03640/AT4G18340/AT1G02850/AT1G60260/AT2G26600/AT1G09460/AT1G61820/AT4G21760/AT1G78520/AT1G52400/AT3G09260/AT3G60130/AT1G66270/AT3G55430/AT5G49900/AT3G07320/AT3G57270/AT2G44470/AT2G44450/AT5G55180/AT5G63240/AT1G51470/AT1G66280/AT1G47600/AT3G60120/AT1G60270/AT4G26830/AT3G57260/AT3G04010/AT5G28510
GO:1902275	regulation of chromatin organization	53	0.374906	1.30999	0.0899743	0.531859	7712	tags=66%, list=38%, signal=41%	AT5G11470/AT3G24140/AT4G04180/AT1G54440/AT1G04020/AT4G39100/AT2G16485/AT3G48430/AT3G25100/AT1G14350/AT3G15120/AT1G77300/AT3G63270/AT4G18470/AT2G23740/AT5G28390/AT4G30200/AT5G39550/AT5G37055/AT1G66050/AT3G44600/AT2G16390/AT4G24970/AT1G57820/AT1G05910/AT2G06210/AT4G36270/AT4G22140/AT1G19100/AT2G42940/AT4G21070/AT4G36290/AT5G35910/AT3G01460/AT4G00830
GO:0042802	identical protein binding	328	-0.297941	-1.20564	0.090566	0.533512	3324	tags=16%, list=16%, signal=14%	AT4G38710/AT3G63480/AT3G51960/AT5G65180/AT1G79340/AT4G26200/AT2G26740/AT2G38400/AT3G07780/AT4G33950/AT5G28770/AT1G52400/AT5G51070/AT4G00570/AT5G27380/AT4G08960/AT3G28180/AT4G17870/AT2G32550/AT3G09260/AT5G50960/AT2G14750/AT5G19000/AT4G26750/AT4G24660/AT2G30490/AT4G01026/AT5G02200/AT1G14687/AT3G49250/AT4G19003/AT2G39180/AT4G35160/AT2G36100/AT1G49950/AT4G31800/AT5G63240/AT5G58750/AT1G12220/AT5G35750…
GO:0015932	nucleobase-containing compound transmembrane transporter activity	46	-0.438312	-1.35833	0.0907618	0.533512	3577	tags=28%, list=18%, signal=23%	AT1G76670/AT4G05110/AT3G51870/AT1G14560/AT1G12600/AT5G07320/AT5G56450/AT4G23010/AT4G31600/AT5G27520/AT4G05120/AT5G61810
GO:0007049	cell cycle	240	0.279421	1.20682	0.0909091	0.533512	5731	tags=38%, list=28%, signal=28%	AT3G60550/AT3G27630/AT4G22410/AT2G45080/AT1G15290/AT3G49860/AT2G13680/AT5G02220/AT5G59360/AT1G08180/AT5G58370/AT2G28870/AT1G01690/AT1G51355/AT2G21800/AT4G30710/AT2G30820/AT3G21870/AT5G48600/AT1G69400/AT1G44110/AT1G64625/AT1G73740/AT3G48187/AT3G15150/AT2G03670/AT1G49910/AT5G54260/AT5G06680/AT5G67260/AT5G46700/AT1G80370/AT1G48270/AT3G53230/AT2G46980/AT2G17620/AT5G22840/AT3G48150/AT5G40820/AT1G04030…
GO:0034719	SMN-Sm protein complex	14	0.571507	1.45053	0.0909091	0.533512	202	tags=7%, list=1%, signal=7%	AT4G20440
GO:0006596	polyamine biosynthetic process	15	-0.578541	-1.40513	0.0910714	0.533512	3902	tags=53%, list=19%, signal=43%	AT5G15950/AT3G02470/AT1G28680/AT5G07080/AT4G34710/AT3G17717/AT3G25570
GO:0009696	salicylic acid metabolic process	18	-0.539662	-1.36801	0.0923623	0.53953	3863	tags=50%, list=19%, signal=41%	AT2G37040/AT2G23620/AT1G18870/AT5G24530/AT4G10500/AT4G39030/AT2G23580/AT4G10490
GO:0000075	cell cycle checkpoint	30	0.45897	1.40683	0.0926366	0.53953	3875	tags=30%, list=19%, signal=24%	AT3G01600/AT1G13448/AT1G20720/AT1G69400/AT1G49910/AT4G30870/AT3G25100/AT1G80210/AT1G02970
GO:0032040	small-subunit processome	30	0.458622	1.40577	0.0926366	0.53953	7276	tags=57%, list=36%, signal=36%	AT1G17690/AT4G25630/AT5G16750/AT5G66540/AT3G11964/AT1G69070/AT3G12860/AT5G27120/AT4G12600/AT3G05060/AT3G06530/AT5G08600/AT1G56110/AT5G08420/AT5G14050/AT3G21540/AT1G15440
GO:0043928	exonucleolytic catabolism of deadenylated mRNA	15	0.55152	1.42872	0.0927602	0.53953	1032	tags=20%, list=5%, signal=19%	AT1G61470/AT5G22250/AT3G44260
GO:0016073	snRNA metabolic process	18	0.52846	1.41381	0.0933941	0.541316	7133	tags=56%, list=35%, signal=36%	AT2G21070/AT3G57150/AT2G20490/AT2G25355/AT3G46210/AT5G51170/AT3G12990/AT5G08180/AT3G60500/AT1G60080
GO:0019887	protein kinase regulator activity	45	0.390821	1.30526	0.0935065	0.541316	3163	tags=22%, list=16%, signal=19%	AT3G27630/AT3G50630/AT5G02220/AT5G59360/AT1G08180/AT2G28870/AT1G51355/AT2G32710/AT2G23430/AT5G48820
GO:2001023	regulation of response to drug	26	0.465443	1.36379	0.09375	0.541316	2964	tags=38%, list=15%, signal=33%	AT4G14390/AT3G50060/AT4G14400/AT4G03450/AT4G03500/AT3G52430/AT5G39420/AT4G37260/AT4G05040/AT2G14825
GO:2001038	regulation of cellular response to drug	26	0.465443	1.36379	0.09375	0.541316	2964	tags=38%, list=15%, signal=33%	AT4G14390/AT3G50060/AT4G14400/AT4G03450/AT4G03500/AT3G52430/AT5G39420/AT4G37260/AT4G05040/AT2G14825
GO:0042742	defense response to bacterium	332	0.261279	1.17473	0.0938967	0.541316	2274	tags=17%, list=11%, signal=16%	AT4G23810/AT4G14465/AT1G02450/AT2G38470/AT5G27420/AT4G14390/AT3G56710/AT5G58430/AT2G01830/AT1G18570/AT4G02420/AT5G26920/AT5G14700/AT5G22250/AT3G50060/AT4G14400/AT1G66700/AT5G18350/AT3G53810/AT3G56400/AT5G61420/AT5G04720/AT1G80840/AT1G73805/AT1G33560/AT1G77920/AT4G23180/AT1G62510/AT2G30790/AT3G45640/AT5G52830/AT3G44260/AT2G46380/AT4G03450/AT5G07690/AT1G70740/AT5G67385/AT2G19190/AT2G30860/AT4G03500…
GO:1905269	positive regulation of chromatin organization	19	0.513652	1.39975	0.0955711	0.549997	7570	tags=68%, list=37%, signal=43%	AT4G04180/AT1G54440/AT1G04020/AT1G14350/AT1G77300/AT4G30200/AT5G39550/AT1G66050/AT2G16390/AT1G57820/AT2G42940/AT4G21070/AT5G35910
GO:0042430	indole-containing compound metabolic process	79	-0.38673	-1.30577	0.096063	0.551014	3559	tags=34%, list=18%, signal=28%	AT5G17990/AT1G16400/AT4G31500/AT5G05730/AT1G16410/AT2G23190/AT1G69370/AT2G22330/AT3G09260/AT5G36220/AT2G04400/AT4G28410/AT5G53810/AT3G55840/AT4G37400/AT3G28740/AT4G30530/AT1G77520/AT5G05590/AT1G77530/AT5G27520/AT5G67310/AT1G63140/AT5G60890/AT4G37410/AT5G28237
GO:0003951	NAD+ kinase activity	13	-0.591116	-1.40273	0.0960854	0.551014	4144	tags=69%, list=20%, signal=55%	AT5G23450/AT2G46090/AT2G20900/AT3G21070/AT4G30340/AT5G63770/AT2G18730/AT5G07920
GO:0006721	terpenoid metabolic process	127	-0.346354	-1.27196	0.0973451	0.557258	1992	tags=17%, list=10%, signal=16%	AT3G61460/AT3G14530/AT5G07200/AT3G21780/AT3G47190/AT5G58660/AT3G20940/AT2G27000/AT5G58750/AT5G41120/AT3G29430/AT4G15340/AT4G36810/AT3G25820/AT1G49530/AT1G02400/AT3G03990/AT5G61780/AT5G48110/AT3G25180/AT1G61120
GO:0065009	regulation of molecular function	264	-0.30092	-1.19414	0.0979112	0.559517	2966	tags=17%, list=15%, signal=15%	AT4G33950/AT1G32740/AT2G01690/AT2G17290/AT4G08960/AT2G44740/AT4G17870/AT2G32550/AT4G28480/AT3G50850/AT5G52200/AT2G31305/AT3G05327/AT5G15930/AT5G23600/AT4G23650/AT1G09995/AT3G17980/AT2G01540/AT3G07980/AT3G16420/AT5G64620/AT3G07890/AT5G52580/AT1G70790/AT3G02460/AT1G35670/AT4G28550/AT3G19150/AT3G11410/AT1G53570/AT3G13530/AT1G07150/AT4G27100/AT4G17470/AT5G52250/AT5G67080/AT4G26890/AT4G16500/AT5G46330…
GO:0009739	response to gibberellin	77	-0.382473	-1.28955	0.0982839	0.560665	2930	tags=31%, list=14%, signal=27%	AT5G67300/AT3G47620/AT2G36890/AT5G52660/AT4G25000/AT1G66350/AT3G63010/AT1G12240/AT3G61460/AT1G67100/AT5G14920/AT1G75750/AT5G59780/AT1G49950/AT1G62660/AT2G34080/AT2G31730/AT3G16350/AT5G17490/AT5G56840/AT1G14920/AT5G67480/AT4G19700
GO:0016192	vesicle-mediated transport	378	-0.289765	-1.18509	0.0990099	0.56369	6043	tags=37%, list=30%, signal=26%	AT4G33240/AT5G46630/AT1G22200/AT1G60780/AT2G27600/AT1G50500/AT5G58440/AT1G79985/AT4G01395/AT3G01340/AT3G43230/AT1G04117/AT2G20320/AT4G39890/AT5G17060/AT4G14455/AT2G04690/AT5G61010/AT3G09530/AT3G09520/AT1G36050/AT2G01600/AT1G75760/AT2G01470/AT4G29440/AT2G45980/AT1G75170/AT5G56020/AT5G61210/AT3G14090/AT3G47810/AT1G47560/AT2G20760/AT2G33110/AT4G14950/AT4G39820/AT4G39990/AT3G47700/AT1G18190/AT1G08770…
GO:0030136	clathrin-coated vesicle	39	-0.457167	-1.36791	0.0991597	0.56369	3454	tags=26%, list=17%, signal=21%	AT2G43160/AT5G16830/AT2G21190/AT1G25240/AT5G42090/AT2G25430/AT4G25070/AT1G05020/AT5G10410
GO:0009409	response to cold	368	-0.290569	-1.18665	0.100248	0.567927	3827	tags=25%, list=19%, signal=21%	AT3G10760/AT4G08500/AT5G12140/AT1G80820/AT3G18990/AT1G14140/AT5G53000/AT1G29395/AT5G63320/AT5G44610/AT4G39730/AT3G54050/AT5G65020/AT2G15970/AT3G16470/AT5G61030/AT5G02500/AT4G17090/AT5G50950/AT1G17190/AT4G22950/AT4G03460/AT1G25450/AT1G76470/AT4G13860/AT1G09560/AT1G16670/AT2G01918/AT1G09500/AT5G43760/AT3G61580/AT1G21910/ATCG00480/AT4G02520/AT4G34710/AT3G09260/AT4G17615/AT4G35985/AT1G66270/AT5G58070…
GO:0032101	regulation of response to external stimulus	194	0.28067	1.19503	0.100346	0.567927	2972	tags=20%, list=15%, signal=17%	AT1G32640/AT4G14465/AT1G02450/AT4G14390/AT3G24900/AT5G20480/AT1G47890/AT5G26920/AT2G33020/AT4G14400/AT1G79030/AT3G56400/AT1G73805/AT4G13810/AT3G18690/AT4G03450/AT1G13300/AT1G20160/AT1G20900/AT4G03500/AT1G32540/AT5G47220/AT4G04920/AT2G41370/AT5G24590/AT3G26830/AT2G37630/AT5G63190/AT3G52430/AT3G51480/AT3G56410/AT3G01310/AT4G13880/AT5G18650/AT3G28890/AT5G39420/AT4G05040/AT1G03830
GO:0018209	peptidyl-serine modification	85	-0.371584	-1.28138	0.100775	0.567927	5296	tags=41%, list=26%, signal=31%	AT2G41860/AT5G04870/AT1G74740/AT5G01820/AT1G72710/AT5G44100/AT1G03930/AT1G04440/AT1G01130/AT3G13670/AT5G58380/AT4G04700/AT4G14350/AT5G45810/AT4G35310/AT1G29230/AT1G18890/AT2G17290/AT5G45820/AT1G08650/AT2G32795/AT5G57015/AT5G24430/AT2G30360/AT4G23650/AT4G21940/AT3G10660/AT1G01140/AT1G12680/AT1G35670/AT5G07070/AT4G18700/AT2G34180/AT5G01810
GO:1903825	organic acid transmembrane transport	63	0.361868	1.29752	0.100775	0.567927	2237	tags=25%, list=11%, signal=23%	AT4G38250/AT4G24570/AT1G25530/AT3G28960/AT2G37460/AT1G01070/AT2G38120/AT5G23810/AT4G01430/AT2G21050/AT1G77690/AT4G08290/AT5G46110/AT3G54830/AT2G37450/AT4G08300
GO:1905039	carboxylic acid transmembrane transport	63	0.361868	1.29752	0.100775	0.567927	2237	tags=25%, list=11%, signal=23%	AT4G38250/AT4G24570/AT1G25530/AT3G28960/AT2G37460/AT1G01070/AT2G38120/AT5G23810/AT4G01430/AT2G21050/AT1G77690/AT4G08290/AT5G46110/AT3G54830/AT2G37450/AT4G08300
GO:0003887	DNA-directed DNA polymerase activity	27	0.450602	1.3418	0.101176	0.569205	7403	tags=59%, list=36%, signal=38%	AT1G14460/AT4G24790/AT4G18820/AT1G67630/AT5G45720/AT2G02480/AT1G10520/AT5G67100/AT4G00060/AT5G52800/AT1G49980/AT3G20540/AT1G50840/AT2G42120/AT5G44740/AT1G67320
GO:0097458	neuron part	21	-0.520986	-1.36966	0.101576	0.569647	1238	tags=19%, list=6%, signal=18%	AT4G17470/AT5G09890/AT5G52882
GO:0009815	1-aminocyclopropane-1-carboxylate oxidase activity	12	-0.60997	-1.40571	0.101604	0.569647	3905	tags=50%, list=19%, signal=40%	AT2G25450/AT2G19590/AT1G05010/AT3G61400/AT2G30830
GO:0006298	mismatch repair	14	0.558726	1.4181	0.102273	0.571104	6023	tags=64%, list=30%, signal=45%	AT4G02070/AT3G24320/AT3G18524/AT2G29570/AT3G05210/AT2G25100/AT1G07370/AT4G09140/AT5G10950
GO:0005732	small nucleolar ribonucleoprotein complex	18	0.518123	1.38616	0.102506	0.571104	7490	tags=67%, list=37%, signal=42%	AT3G57150/AT4G25630/AT2G20490/AT5G66540/AT4G30220/AT3G12860/AT5G27120/AT4G12600/AT3G05060/AT5G08180/AT1G56110/AT3G59810
GO:0009756	carbohydrate mediated signaling	47	0.378447	1.27656	0.102564	0.571104	4972	tags=30%, list=24%, signal=23%	AT3G06640/AT1G52340/AT5G49470/AT2G42640/AT3G06630/AT5G56860/AT5G03280/AT3G48360/AT1G09100/AT1G56650/AT4G02060/AT1G73660/AT2G13600/AT4G24480
GO:0010182	sugar mediated signaling pathway	47	0.378447	1.27656	0.102564	0.571104	4972	tags=30%, list=24%, signal=23%	AT3G06640/AT1G52340/AT5G49470/AT2G42640/AT3G06630/AT5G56860/AT5G03280/AT3G48360/AT1G09100/AT1G56650/AT4G02060/AT1G73660/AT2G13600/AT4G24480
GO:0008061	chitin binding	19	-0.52757	-1.35982	0.102967	0.572369	2110	tags=47%, list=10%, signal=42%	AT3G12500/AT4G19720/AT2G43570/AT4G19820/AT2G43610/AT2G43620/AT4G19810/AT2G23770
GO:0042623	ATPase activity, coupled	254	0.269066	1.1698	0.103306	0.572518	6381	tags=39%, list=31%, signal=27%	AT1G51380/AT1G05460/AT5G04895/AT2G24250/AT4G02070/AT4G24860/AT3G24320/AT5G19210/AT1G20720/AT1G48650/AT3G09660/AT5G27680/AT3G18524/AT3G10140/AT5G47820/AT3G12810/AT1G08060/AT1G09100/AT4G01020/AT1G03190/AT5G63630/AT2G35340/AT4G35740/AT4G26660/AT3G02060/AT4G15850/AT1G79890/AT2G36720/AT3G25100/AT5G53170/AT2G45810/AT1G06670/AT3G20150/AT2G40700/AT2G07690/AT5G08620/AT5G10370/AT1G44900/AT3G13920/AT4G17020…
GO:0007088	regulation of mitotic nuclear division	25	0.464068	1.34683	0.103365	0.572518	5173	tags=44%, list=25%, signal=33%	AT5G64910/AT1G13448/AT5G49430/AT3G21700/AT1G69400/AT1G49910/AT3G48150/AT3G05870/AT4G21530/AT5G54840/AT1G79280
GO:0009798	axis specification	17	0.540435	1.42604	0.103687	0.572518	3297	tags=53%, list=16%, signal=44%	AT2G45450/AT1G23080/AT5G03680/AT1G69270/AT1G28560/AT5G59340/AT1G19850/AT1G13980/AT5G56270
GO:0030163	protein catabolic process	366	-0.290639	-1.18588	0.103832	0.572518	2620	tags=16%, list=13%, signal=14%	AT1G79650/AT3G18980/AT2G22690/AT3G17280/AT5G63160/AT5G52060/AT1G26800/AT5G50430/AT2G42350/AT5G43190/AT1G79110/AT3G61460/AT4G35480/AT2G25740/AT5G64920/AT4G15410/AT2G22010/AT1G44130/AT5G39250/AT3G19470/AT3G18773/AT2G39710/AT3G12700/AT2G42030/AT5G59550/AT2G39720/AT3G62690/AT1G65240/AT5G05810/AT1G25150/AT2G35000/AT2G37580/AT1G15100/AT5G47330/AT2G02870/AT5G60820/AT4G17470/AT3G09350/AT2G35910/AT2G01150…
GO:2000031	regulation of salicylic acid mediated signaling pathway	23	0.476914	1.36387	0.104019	0.572518	2962	tags=39%, list=15%, signal=33%	AT4G14390/AT3G50060/AT4G14400/AT4G03450/AT4G03500/AT3G52430/AT5G39420/AT4G37260/AT4G05040
GO:0009791	post-embryonic development	429	0.247891	1.13525	0.104046	0.572518	3449	tags=21%, list=17%, signal=18%	AT3G10590/AT3G21150/AT1G49320/AT2G17040/AT5G53210/AT3G61880/AT3G57670/AT5G39860/AT4G37810/AT2G46400/AT3G54720/AT5G51870/AT1G69440/AT3G24300/AT1G74660/AT2G27990/AT4G12750/AT3G18000/AT1G69490/AT1G73590/AT1G67260/AT2G30370/AT1G01070/AT5G05860/AT5G64770/AT2G36910/AT1G31880/AT2G38120/AT4G37750/AT5G24380/AT3G45640/AT5G48150/AT4G01430/AT5G61850/AT5G23320/AT5G60450/AT1G21210/AT5G01200/AT5G51810/AT1G32560…
GO:0080144	amino acid homeostasis	12	0.573127	1.40824	0.104308	0.572994	3692	tags=42%, list=18%, signal=34%	AT2G37460/AT4G08290/AT2G37450/AT4G08300/AT3G09770
GO:0031410	cytoplasmic vesicle	398	-0.284621	-1.16967	0.104551	0.573361	4838	tags=26%, list=24%, signal=20%	AT1G16020/AT3G61130/AT3G12400/AT3G49720/AT2G22900/AT1G18630/AT2G20810/AT4G37690/AT5G39510/AT4G19640/AT5G11710/AT4G29140/AT3G62830/AT2G38410/AT2G37840/AT1G71900/AT2G26890/AT3G14270/AT5G25250/AT2G30330/AT1G75210/AT1G55830/AT3G15730/AT3G66654/AT5G66120/AT3G23870/AT5G45550/AT4G16144/AT5G65270/AT4G08500/AT2G40280/AT5G45130/AT1G32410/AT1G08720/AT1G67330/AT3G11530/AT2G43160/AT2G38360/AT2G40380/AT5G16830…
GO:1901659	glycosyl compound biosynthetic process	82	-0.374977	-1.27562	0.105512	0.577659	4965	tags=39%, list=24%, signal=30%	AT1G74100/AT5G23010/AT4G12030/AT4G13430/AT1G80380/AT5G14200/AT1G71100/AT1G65860/AT4G04880/AT1G12140/AT1G55810/AT1G24100/AT1G62560/AT5G15950/AT2G25450/AT4G23100/AT4G26510/AT1G16400/AT3G02470/AT4G31500/AT1G16410/AT2G22330/AT3G19710/AT1G17410/AT5G11160/AT4G28410/AT3G17717/AT1G65880/AT3G25570/AT5G60890/AT2G30830
GO:1901981	phosphatidylinositol phosphate binding	22	-0.511828	-1.36802	0.105719	0.577749	5147	tags=59%, list=25%, signal=44%	AT4G30510/AT5G05710/AT2G29700/AT5G55910/AT2G28320/AT3G15730/AT3G62770/AT5G44610/AT3G56440/AT2G40810/AT4G20260/AT2G42010
GO:0009903	chloroplast avoidance movement	22	0.486015	1.3775	0.105882	0.577749	3345	tags=45%, list=16%, signal=38%	AT1G66840/AT3G13190/AT1G42550/AT2G38370/AT3G56270/AT2G40480/AT5G42880/AT3G45780/AT1G75720/AT1G75100
GO:0031418	L-ascorbic acid binding	24	-0.495995	-1.36255	0.106346	0.577826	3345	tags=25%, list=16%, signal=21%	AT4G33910/AT1G05010/AT1G20270/AT1G48740/AT5G43660
GO:0032787	monocarboxylic acid metabolic process	436	-0.284454	-1.17467	0.106538	0.577826	4138	tags=23%, list=20%, signal=19%	AT5G42740/AT3G16170/AT2G02390/AT3G56060/AT3G15730/AT3G22400/AT1G64670/AT2G04240/AT4G13050/AT1G02860/AT1G76150/AT5G16340/AT4G24510/AT5G03690/AT2G37040/AT2G23620/AT5G16390/AT3G29160/AT1G79440/AT1G16400/AT1G66120/AT2G46720/AT2G31360/AT4G30440/AT3G15650/AT3G10280/AT4G31500/AT3G55410/AT4G33950/AT1G16410/AT2G28630/AT4G22305/AT1G25450/AT1G19630/AT1G06360/AT1G52400/AT5G43760/AT4G00570/AT2G22330/AT4G23850…
GO:0046658	anchored component of plasma membrane	133	-0.340404	-1.25869	0.106569	0.577826	3573	tags=30%, list=18%, signal=25%	AT2G26600/AT3G29810/AT5G44610/AT4G23950/AT5G60920/AT1G74790/AT3G22600/AT5G18610/AT1G61900/AT5G57920/AT4G35100/AT5G51480/AT5G04310/AT2G42365/AT4G28365/AT3G07320/AT3G43720/AT3G57270/AT4G27520/AT2G32300/AT2G44790/AT3G02880/AT4G20260/AT5G55180/AT3G52470/AT1G65240/AT1G27950/AT4G12420/AT5G15350/AT5G20230/AT4G36945/AT1G03870/AT4G12730/AT4G26690/AT5G48450/AT4G26830/AT3G57260/AT3G04010/AT5G44130
GO:0006073	cellular glucan metabolic process	190	-0.317594	-1.22098	0.106944	0.577826	3450	tags=24%, list=17%, signal=20%	AT5G62220/AT3G06550/AT5G09870/AT3G23920/AT5G05170/AT5G49190/AT4G24260/AT3G62720/AT4G17090/AT2G01850/AT1G69830/AT2G25540/AT4G03210/AT1G32170/AT4G14130/AT2G06850/AT5G48070/AT5G64740/AT1G65310/AT5G50750/AT1G74380/AT2G39770/AT4G03550/AT3G03050/AT4G30290/AT3G08900/AT1G70230/AT5G06700/AT1G48930/AT3G07160/AT4G30270/AT5G63240/AT5G15650/AT2G20370/AT5G16910/AT4G30280/AT2G36850/AT4G26690/AT5G57550/AT3G23730…
GO:0044042	glucan metabolic process	190	-0.317594	-1.22098	0.106944	0.577826	3450	tags=24%, list=17%, signal=20%	AT5G62220/AT3G06550/AT5G09870/AT3G23920/AT5G05170/AT5G49190/AT4G24260/AT3G62720/AT4G17090/AT2G01850/AT1G69830/AT2G25540/AT4G03210/AT1G32170/AT4G14130/AT2G06850/AT5G48070/AT5G64740/AT1G65310/AT5G50750/AT1G74380/AT2G39770/AT4G03550/AT3G03050/AT4G30290/AT3G08900/AT1G70230/AT5G06700/AT1G48930/AT3G07160/AT4G30270/AT5G63240/AT5G15650/AT2G20370/AT5G16910/AT4G30280/AT2G36850/AT4G26690/AT5G57550/AT3G23730…
GO:0048639	positive regulation of developmental growth	17	-0.541737	-1.35724	0.107394	0.577826	3400	tags=47%, list=17%, signal=39%	AT4G32551/AT1G13710/AT4G35730/AT1G64110/AT5G09890/AT3G59900/AT5G52882
GO:0005750	mitochondrial respiratory chain complex III	11	-0.61928	-1.38375	0.107407	0.577826	6095	tags=55%, list=30%, signal=38%	AT3G27240/AT1G51980/AT3G02090/AT5G13440/AT5G25450
GO:0015698	inorganic anion transport	68	-0.390284	-1.28072	0.107595	0.577826	2845	tags=29%, list=14%, signal=25%	AT2G03250/AT3G60320/AT4G19030/AT1G14040/AT5G50200/AT1G26730/AT5G40890/AT4G17970/AT1G12110/AT1G08090/AT2G03240/AT1G72180/AT1G35350/AT5G09470/AT3G45060/AT3G45700/AT4G09420/AT3G27170/AT5G24030
GO:0006576	cellular biogenic amine metabolic process	53	-0.416585	-1.31126	0.107667	0.577826	3902	tags=43%, list=19%, signal=35%	AT4G27070/AT5G15950/AT5G17990/AT3G02470/AT1G28680/AT4G31500/AT5G05730/AT5G07080/AT1G69370/AT2G22330/AT4G08870/AT4G34710/AT3G59050/AT2G04400/AT1G09240/AT3G17717/AT3G55840/AT3G25570/AT1G65840/AT5G05590/AT5G60890/AT5G28237
GO:0044106	cellular amine metabolic process	53	-0.416585	-1.31126	0.107667	0.577826	3902	tags=43%, list=19%, signal=35%	AT4G27070/AT5G15950/AT5G17990/AT3G02470/AT1G28680/AT4G31500/AT5G05730/AT5G07080/AT1G69370/AT2G22330/AT4G08870/AT4G34710/AT3G59050/AT2G04400/AT1G09240/AT3G17717/AT3G55840/AT3G25570/AT1G65840/AT5G05590/AT5G60890/AT5G28237
GO:0009742	brassinosteroid mediated signaling pathway	61	-0.397789	-1.28461	0.108065	0.579006	3245	tags=28%, list=16%, signal=23%	AT4G36780/AT4G30610/AT4G15400/AT3G58850/AT1G13460/AT4G18890/AT3G51550/AT3G16570/AT4G11845/AT2G18300/AT5G57780/AT3G50750/AT1G63500/AT2G42580/AT4G28720/AT2G42870
GO:0044769	ATPase activity, coupled to transmembrane movement of ions, rotational mechanism	40	-0.451366	-1.35454	0.108291	0.579126	7425	tags=62%, list=37%, signal=40%	AT4G38920/ATCG00150/AT3G42050/AT2G16510/AT5G55290/AT4G11150/AT2G21410/AT4G26710/AT1G51650/AT4G39080/AT3G28710/AT1G78900/AT2G33040/AT3G28715/AT2G07671/ATMG01080/AT1G19910/AT1G16820/AT4G02620/AT2G07698/ATCG00470/AT5G13450/ATCG00480/AT1G64200
GO:0000724	double-strand break repair via homologous recombination	48	0.370915	1.26196	0.108808	0.579126	5964	tags=48%, list=29%, signal=34%	AT4G31400/AT2G24250/AT1G04020/AT5G64630/AT3G09660/AT5G15920/AT5G27680/AT3G15150/AT1G65470/AT4G30870/AT4G35740/AT3G25100/AT1G10930/AT4G00020/AT1G31360/AT3G05210/AT2G17036/AT5G41150/AT3G19210/AT5G64520/AT3G05740/AT1G27880/AT3G12530
GO:0000725	recombinational repair	48	0.370915	1.26196	0.108808	0.579126	5964	tags=48%, list=29%, signal=34%	AT4G31400/AT2G24250/AT1G04020/AT5G64630/AT3G09660/AT5G15920/AT5G27680/AT3G15150/AT1G65470/AT4G30870/AT4G35740/AT3G25100/AT1G10930/AT4G00020/AT1G31360/AT3G05210/AT2G17036/AT5G41150/AT3G19210/AT5G64520/AT3G05740/AT1G27880/AT3G12530
GO:0048768	root hair cell tip growth	15	-0.56572	-1.37399	0.108929	0.579126	3976	tags=33%, list=20%, signal=27%	AT5G44610/AT3G18780/AT2G45160/AT5G49680
GO:0023051	regulation of signaling	292	-0.295129	-1.1789	0.108974	0.579126	2800	tags=18%, list=14%, signal=16%	AT5G67300/AT1G30135/AT1G52400/AT5G66730/AT2G22430/AT2G32550/AT1G13460/AT1G24625/AT3G57120/AT1G66350/AT2G34600/AT3G63010/AT5G52200/AT5G41790/AT2G41230/AT1G74330/AT4G03110/AT3G51550/AT3G17980/AT2G01540/AT4G39070/AT1G10560/AT1G70790/AT3G23150/AT2G25490/AT5G65160/AT1G35670/AT3G11410/AT1G15100/AT3G17860/AT5G10720/AT4G17470/AT1G74950/AT1G70700/AT5G46590/AT1G51800/AT2G01150/AT1G72450/AT5G17490/AT3G02140…
GO:0006720	isoprenoid metabolic process	144	-0.333168	-1.24342	0.109353	0.580191	3460	tags=24%, list=17%, signal=20%	AT1G61680/AT1G68320/AT2G34630/AT4G13280/AT4G34650/AT1G19630/AT2G23410/AT1G52400/AT1G78510/AT1G07240/AT4G32810/AT3G61460/AT3G14530/AT5G07200/AT3G21780/AT1G74340/AT3G47190/AT5G58660/AT3G20940/AT2G27000/AT5G58750/AT5G41120/AT3G29430/AT4G15340/AT4G36810/AT3G25820/AT1G49530/AT1G02400/AT3G03990/AT5G61780/AT5G48110/AT3G25180/AT1G61120
GO:1902600	proton transmembrane transport	73	-0.382918	-1.28002	0.109546	0.580275	7425	tags=56%, list=37%, signal=36%	AT4G38920/ATCG00150/AT3G42050/AT5G57350/AT2G16510/AT5G55290/AT4G11150/AT2G21410/AT4G26710/AT1G15690/AT1G51650/AT4G39080/AT3G28710/AT1G78900/AT4G32470/AT2G21870/AT2G33040/AT3G28715/AT3G27240/AT2G07671/ATMG01080/AT2G07741/AT1G20260/ATMG01170/AT3G15640/AT1G53760/AT1G19910/AT4G23710/AT1G16820/AT4G02620/AT2G07698/ATCG00470/AT1G52710/AT5G13450/AT3G58730/ATCG00480/ATCG00130/AT3G52300/AT1G64200/AT5G25450
GO:0045492	xylan biosynthetic process	31	0.431602	1.33522	0.110577	0.583839	5589	tags=58%, list=28%, signal=42%	AT1G09610/AT5G01360/AT5G54690/AT2G15440/AT4G36890/AT3G50220/AT4G09990/AT1G27440/AT1G73140/AT1G33800/AT5G46340/AT3G18660/AT4G24910/AT1G19300/AT2G34410/AT4G33330/AT2G37090/AT3G55990
GO:0050826	response to freezing	31	0.434175	1.34318	0.110577	0.583839	2962	tags=35%, list=15%, signal=30%	AT4G14390/AT3G27660/AT4G14400/AT4G25140/AT4G03450/AT4G03500/AT5G40420/AT3G06510/AT3G26744/AT2G40150/AT4G05040
GO:0043531	ADP binding	148	0.299587	1.22501	0.111111	0.585169	2469	tags=20%, list=12%, signal=17%	AT4G11340/AT1G15890/AT5G38340/AT1G72940/AT1G66090/AT5G46260/AT5G41740/AT4G16880/AT1G62630/AT5G18350/AT1G72900/AT5G04720/AT1G33560/AT2G14080/AT1G56520/AT5G43740/AT1G63360/AT1G63730/AT4G16892/AT5G41750/AT4G26090/AT5G11250/AT5G58120/AT1G59218/AT1G59620/AT5G46270/AT1G12210/AT5G66910/AT4G16950
GO:0010498	proteasomal protein catabolic process	285	-0.294158	-1.17637	0.111538	0.585169	2601	tags=17%, list=13%, signal=15%	AT3G18980/AT2G22690/AT3G17280/AT5G63160/AT5G52060/AT1G26800/AT5G50430/AT2G42350/AT5G43190/AT1G79110/AT3G61460/AT4G35480/AT2G25740/AT5G64920/AT4G15410/AT5G39250/AT3G19470/AT3G18773/AT2G42030/AT5G59550/AT2G39720/AT3G62690/AT5G05810/AT1G25150/AT2G35000/AT2G37580/AT1G15100/AT2G02870/AT5G60820/AT3G09350/AT2G35910/AT2G01150/AT2G22890/AT1G19310/AT3G43430/AT1G55530/AT4G03510/AT1G49200/AT3G27220/AT1G14200…
GO:0008970	phospholipase A1 activity	14	-0.572625	-1.37567	0.1121	0.585169	1988	tags=36%, list=10%, signal=32%	AT1G31480/AT2G31690/AT1G05800/AT2G44810
GO:0033108	mitochondrial respiratory chain complex assembly	13	-0.585071	-1.38838	0.1121	0.585169	588	tags=38%, list=3%, signal=37%	AT4G32470/AT3G08950/AT5G67490/AT5G25450
GO:0005088	Ras guanyl-nucleotide exchange factor activity	24	0.462492	1.33099	0.112172	0.585169	1198	tags=21%, list=6%, signal=20%	AT5G05940/AT1G31650/AT5G02010/AT1G65920/AT5G19420
GO:0033356	UDP-L-arabinose metabolic process	12	-0.606993	-1.39885	0.112299	0.585169	3114	tags=42%, list=15%, signal=35%	AT5G50750/AT2G34850/AT3G08900/AT5G15650
GO:0000154	rRNA modification	33	0.419673	1.32571	0.11244	0.585169	6840	tags=58%, list=34%, signal=38%	AT4G26600/AT2G21070/AT3G57150/AT4G25630/AT2G20490/AT5G26180/AT3G12860/AT5G27120/AT3G05060/AT1G22270/AT2G39670/AT1G10490/AT4G25730/AT1G76050/AT5G51140/AT5G08180/AT5G57280/AT3G13180/AT1G56110
GO:0048513	animal organ development	15	-0.564168	-1.37023	0.1125	0.585169	1770	tags=27%, list=9%, signal=24%	AT1G04200/AT4G17470/AT5G09890
GO:0009880	embryonic pattern specification	17	0.52154	1.37619	0.112903	0.585169	3297	tags=47%, list=16%, signal=39%	AT1G23080/AT1G04550/AT1G69270/AT1G28560/AT5G59340/AT1G19850/AT1G13980/AT5G56270
GO:0006833	water transport	22	0.479676	1.35953	0.112941	0.585169	5917	tags=45%, list=29%, signal=32%	AT5G07600/AT5G07520/AT4G01470/AT5G07550/AT5G07540/AT2G18790/AT5G07530/AT4G20140/AT2G26330/AT3G53420
GO:0042044	fluid transport	22	0.479676	1.35953	0.112941	0.585169	5917	tags=45%, list=29%, signal=32%	AT5G07600/AT5G07520/AT4G01470/AT5G07550/AT5G07540/AT2G18790/AT5G07530/AT4G20140/AT2G26330/AT3G53420
GO:0043628	ncRNA 3'-end processing	26	0.441605	1.29394	0.112981	0.585169	8529	tags=65%, list=42%, signal=38%	AT3G57150/AT4G25630/AT1G22660/AT3G16260/AT2G25355/AT1G59760/AT3G04770/AT3G46210/AT5G51170/AT3G12990/AT5G27700/AT3G60500/AT1G60080/AT2G04530/AT4G32175/AT5G52470/AT3G53890
GO:0035194	posttranscriptional gene silencing by RNA	16	0.528774	1.38568	0.114943	0.594386	712	tags=19%, list=4%, signal=18%	AT1G69440/AT1G05460/AT1G66700
GO:0043401	steroid hormone mediated signaling pathway	63	-0.394636	-1.2736	0.115447	0.595611	3916	tags=32%, list=19%, signal=26%	AT4G18710/AT2G13790/AT4G03080/AT4G36780/AT4G30610/AT4G15400/AT3G58850/AT1G13460/AT4G18890/AT3G51550/AT3G16570/AT4G11845/AT2G18300/AT5G57780/AT3G50750/AT1G63500/AT2G42580/AT4G28720/AT2G42870
GO:0010038	response to metal ion	419	-0.280289	-1.15451	0.115572	0.595611	4840	tags=27%, list=24%, signal=21%	AT4G17410/AT3G22890/AT2G47630/AT3G15352/ATCG00490/AT5G03730/AT4G38740/AT5G03630/AT2G28190/AT5G11650/AT2G30970/AT1G04700/AT4G13430/AT1G09780/AT3G13110/AT3G20770/AT4G04460/AT5G59880/AT2G44350/AT1G66340/AT5G44460/AT5G02790/AT2G23290/AT2G32700/AT5G38830/AT5G42740/AT2G46800/AT2G01520/AT5G57610/AT3G48990/AT2G19940/AT3G15730/AT5G07350/AT2G37430/AT4G27870/AT1G70000/AT1G02920/AT3G25190/AT1G62740/AT5G37370…
GO:0009705	plant-type vacuole membrane	107	-0.346419	-1.2428	0.115727	0.595611	2468	tags=20%, list=12%, signal=17%	AT5G57190/AT5G46090/AT1G14530/AT3G62780/AT3G11680/AT3G18820/AT5G40890/AT1G31480/AT4G21790/AT2G02180/AT4G17970/AT1G08090/AT5G57565/AT1G75220/AT4G24310/AT5G01490/AT3G16690/AT3G45060/AT1G16370/AT3G27170
GO:0019904	protein domain specific binding	101	0.313832	1.21175	0.115942	0.595778	3384	tags=18%, list=17%, signal=15%	AT2G34420/AT5G38340/AT4G16880/AT2G19710/AT2G14080/AT5G25640/AT2G30790/AT5G11250/AT5G61330/AT1G08550/AT3G04210/AT4G16860/AT1G34760/AT2G47450/AT3G25510/AT5G54270/AT1G26480/AT2G33435
GO:0000784	nuclear chromosome, telomeric region	16	-0.550111	-1.3533	0.116402	0.597201	2975	tags=25%, list=15%, signal=21%	AT1G72740/AT1G49950/AT1G54260
GO:0034762	regulation of transmembrane transport	31	-0.454175	-1.30565	0.117747	0.60245	5252	tags=48%, list=26%, signal=36%	AT1G53110/AT4G05590/AT1G63900/AT5G42960/AT5G62000/AT1G02410/AT4G33950/AT2G17290/AT4G23650/AT1G09995/AT4G27500/AT1G35670/AT3G11410/AT5G46330
GO:0007267	cell-cell signaling	42	0.385478	1.27056	0.117794	0.60245	565	tags=5%, list=3%, signal=5%	AT2G01505/AT5G59305
GO:0008324	cation transmembrane transporter activity	360	0.251409	1.13802	0.118557	0.603826	3108	tags=18%, list=15%, signal=15%	AT3G12030/AT5G09400/AT1G76800/AT3G24300/AT3G46900/AT1G05300/AT2G30080/AT5G59520/AT4G16370/AT2G37925/AT2G25600/AT1G01070/AT1G27770/AT4G22200/AT3G53720/AT4G35290/AT1G64780/AT5G14880/AT2G29100/AT2G03590/AT5G66650/AT2G38170/AT2G46440/AT4G01430/AT1G10970/AT1G55910/AT1G80660/AT2G48060/AT1G05200/AT1G07430/AT2G39890/AT2G26975/AT5G13740/AT3G14070/AT1G16310/AT3G02850/AT3G51860/AT2G40540/AT5G27150/AT1G70300…
GO:0071695	anatomical structure maturation	50	0.371394	1.28486	0.118557	0.603826	3229	tags=32%, list=16%, signal=27%	AT4G28520/AT1G03890/AT5G44120/AT1G69490/AT1G03880/AT4G11280/AT2G38120/AT2G17820/AT3G54390/AT5G05550/AT3G11100/AT5G03280/AT4G30980/AT4G00730/AT5G64980/AT1G13980
GO:0000287	magnesium ion binding	118	-0.342975	-1.24437	0.118619	0.603826	3859	tags=19%, list=19%, signal=15%	AT4G01900/AT3G13900/AT4G14350/AT3G14520/AT1G10700/AT1G61680/AT4G13280/AT4G30920/AT5G27380/AT5G16760/AT3G53620/AT5G54960/AT2G35390/AT3G02040/AT1G59820/AT3G25820/AT3G49160/AT4G08170/AT5G48110/AT1G61120/AT4G33070
GO:0003678	DNA helicase activity	41	0.387096	1.28196	0.119221	0.605949	5843	tags=51%, list=29%, signal=37%	AT2G24250/AT1G20720/AT5G27680/AT1G03190/AT4G35740/AT1G79890/AT2G36720/AT3G25100/AT1G06670/AT2G07690/AT1G44900/AT4G17020/AT1G10930/AT4G02060/AT5G44635/AT1G31360/AT2G17036/AT2G16440/AT3G05740/AT2G01440/AT1G27880
GO:0051345	positive regulation of hydrolase activity	48	-0.420944	-1.31491	0.12013	0.608932	4424	tags=33%, list=22%, signal=26%	AT2G35035/AT1G70800/AT5G37740/AT3G47940/AT4G08960/AT4G28480/AT5G15930/AT3G17980/AT2G01540/AT3G07890/AT5G52580/AT1G70790/AT3G02460/AT4G28550/AT4G27100
GO:0051053	negative regulation of DNA metabolic process	12	0.562456	1.38202	0.120181	0.608932	2246	tags=25%, list=11%, signal=22%	AT5G11470/AT4G04180/AT3G18524
GO:0008889	glycerophosphodiester phosphodiesterase activity	14	-0.569659	-1.36854	0.120996	0.611163	1046	tags=21%, list=5%, signal=20%	AT5G41080/AT4G26690
GO:0051258	protein polymerization	13	-0.579989	-1.37632	0.120996	0.611163	3019	tags=31%, list=15%, signal=26%	AT1G52400/AT5G54650/AT4G13510
GO:0060590	ATPase regulator activity	15	-0.558493	-1.35644	0.121429	0.612398	4459	tags=40%, list=22%, signal=31%	AT3G08910/AT3G47940/AT4G28480/AT3G09350/AT2G20560
GO:0044430	cytoskeletal part	333	0.254051	1.14057	0.122066	0.612425	6438	tags=41%, list=32%, signal=28%	AT4G17220/AT3G49860/AT5G54280/AT1G14380/AT2G19710/AT5G23430/AT4G03175/AT4G27595/AT1G13448/AT5G20450/AT3G23090/AT5G62580/AT2G07170/AT4G24860/AT4G30710/AT4G23496/AT3G10310/AT2G31300/AT1G14690/AT1G18410/AT2G33990/AT3G21700/AT1G21730/AT3G15050/AT1G69400/AT2G21300/AT2G20550/AT2G40120/AT1G19870/AT3G19960/AT1G49910/AT1G11160/AT5G06680/AT1G50360/AT1G54460/AT5G47820/AT3G27350/AT1G27920/AT5G22840/AT2G14825…
GO:0050832	defense response to fungus	310	0.252414	1.12514	0.122172	0.612425	3090	tags=25%, list=15%, signal=21%	AT5G61600/AT2G40140/AT2G38470/AT5G42242/AT5G19175/AT5G38340/AT2G30020/AT1G66090/AT3G43505/AT5G58430/AT5G41740/AT4G16880/AT3G10190/AT3G45410/AT2G37130/AT3G48231/AT1G13755/AT5G44973/AT2G02147/AT3G50060/AT1G13607/AT2G27420/AT3G56400/AT1G13609/AT5G61420/AT1G54445/AT1G80840/AT2G14080/AT3G16895/AT3G05727/AT1G62510/AT2G03740/AT3G45640/AT1G56520/AT1G19900/AT2G02140/AT3G27835/AT2G21465/AT1G75380/AT5G26170…
GO:0008299	isoprenoid biosynthetic process	116	-0.341606	-1.23414	0.122356	0.612425	1992	tags=16%, list=10%, signal=14%	AT3G61460/AT3G14530/AT5G07200/AT3G47190/AT5G58660/AT5G58750/AT3G29430/AT4G15340/AT4G36810/AT3G25820/AT1G49530/AT1G02400/AT3G03990/AT5G61780/AT5G48110/AT3G25180/AT1G61120
GO:0031966	mitochondrial membrane	223	-0.303613	-1.1856	0.122449	0.612425	5520	tags=33%, list=27%, signal=24%	AT2G33220/AT3G24200/AT2G45270/AT4G17650/AT2G07741/AT5G01500/AT3G24570/AT5G09600/ATMG01170/AT3G08950/AT3G02090/AT5G05370/ATMG01200/AT4G39740/AT3G01280/AT5G13440/AT4G28070/AT2G39970/AT5G12390/AT4G01660/AT5G44720/AT1G18600/AT1G32350/AT3G54110/AT1G15220/AT1G65540/AT1G04630/AT5G39900/AT2G07698/AT5G03030/AT2G44520/AT5G67500/AT2G07718/ATMG00670/ATMG00160/AT3G15730/ATMG00590/AT2G30920/AT1G14140/AT5G13490…
GO:0051087	chaperone binding	37	-0.437191	-1.30402	0.122689	0.612425	4459	tags=38%, list=22%, signal=30%	AT3G08910/AT3G47940/AT5G07220/AT1G12060/AT2G25560/AT5G52060/AT4G28480/AT3G07370/AT5G62390/AT5G62100/AT3G14200/AT5G14360/AT2G46240
GO:0015985	energy coupled proton transport, down electrochemical gradient	34	-0.448318	-1.31278	0.122896	0.612425	6807	tags=50%, list=34%, signal=33%	AT1G51650/AT4G39080/AT2G33040/AT3G27240/AT2G07671/ATMG01080/AT2G07741/ATMG01170/AT3G15640/AT2G07698/ATCG00470/AT1G52710/AT5G13450/ATCG00480/ATCG00130/AT3G52300
GO:0015986	ATP synthesis coupled proton transport	34	-0.448318	-1.31278	0.122896	0.612425	6807	tags=50%, list=34%, signal=33%	AT1G51650/AT4G39080/AT2G33040/AT3G27240/AT2G07671/ATMG01080/AT2G07741/ATMG01170/AT3G15640/AT2G07698/ATCG00470/AT1G52710/AT5G13450/ATCG00480/ATCG00130/AT3G52300
GO:0015865	purine nucleotide transport	12	-0.598603	-1.37952	0.122995	0.612425	3577	tags=42%, list=18%, signal=34%	AT1G14560/AT5G07320/AT5G27520/AT5G61810
GO:0009309	amine biosynthetic process	38	-0.439598	-1.3122	0.123311	0.612425	3902	tags=47%, list=19%, signal=38%	AT4G27070/AT5G15950/AT5G17990/AT3G02470/AT1G28680/AT4G31500/AT5G05730/AT5G07080/AT1G69370/AT4G34710/AT2G04400/AT1G09240/AT3G17717/AT3G25570/AT5G05590/AT5G60890/AT5G28237
GO:0042401	cellular biogenic amine biosynthetic process	38	-0.439598	-1.3122	0.123311	0.612425	3902	tags=47%, list=19%, signal=38%	AT4G27070/AT5G15950/AT5G17990/AT3G02470/AT1G28680/AT4G31500/AT5G05730/AT5G07080/AT1G69370/AT4G34710/AT2G04400/AT1G09240/AT3G17717/AT3G25570/AT5G05590/AT5G60890/AT5G28237
GO:0018105	peptidyl-serine phosphorylation	83	-0.366204	-1.25405	0.124019	0.613816	5296	tags=41%, list=26%, signal=30%	AT2G41860/AT5G04870/AT1G74740/AT5G01820/AT1G72710/AT5G44100/AT1G03930/AT1G04440/AT1G01130/AT3G13670/AT5G58380/AT4G04700/AT4G14350/AT5G45810/AT4G35310/AT1G29230/AT1G18890/AT2G17290/AT5G45820/AT1G08650/AT5G57015/AT5G24430/AT2G30360/AT4G23650/AT4G21940/AT3G10660/AT1G01140/AT1G12680/AT1G35670/AT5G07070/AT4G18700/AT2G34180/AT5G01810
GO:0006122	mitochondrial electron transport, ubiquinol to cytochrome c	11	-0.608369	-1.35937	0.124074	0.613816	6095	tags=55%, list=30%, signal=38%	AT3G27240/AT3G02090/AT1G22840/AT4G10040/AT5G25450
GO:0018107	peptidyl-threonine phosphorylation	21	-0.512941	-1.34851	0.124343	0.613816	4676	tags=57%, list=23%, signal=44%	AT1G01130/AT5G58380/AT5G45810/AT1G29230/AT5G45820/AT2G30360/AT1G01140/AT5G07070/AT4G18700/AT2G34180/AT5G01810
GO:0018210	peptidyl-threonine modification	21	-0.512941	-1.34851	0.124343	0.613816	4676	tags=57%, list=23%, signal=44%	AT1G01130/AT5G58380/AT5G45810/AT1G29230/AT5G45820/AT2G30360/AT1G01140/AT5G07070/AT4G18700/AT2G34180/AT5G01810
GO:0009684	indoleacetic acid biosynthetic process	12	-0.595765	-1.37298	0.124777	0.613975	5270	tags=75%, list=26%, signal=56%	AT3G44300/AT2G20610/AT5G54810/AT1G16400/AT4G31500/AT1G16410/AT2G22330/AT4G28410
GO:0005795	Golgi stack	13	0.542434	1.35402	0.125	0.613975	2503	tags=15%, list=12%, signal=13%	AT1G49320/AT2G47770
GO:0060589	nucleoside-triphosphatase regulator activity	86	-0.362245	-1.25635	0.125	0.613975	4459	tags=29%, list=22%, signal=23%	AT1G70810/AT5G46750/AT3G08910/AT1G70800/AT3G15730/AT5G37740/AT3G47940/AT2G37550/AT5G50550/AT3G17660/AT4G28480/AT5G15930/AT3G17980/AT2G01540/AT3G07890/AT5G52580/AT1G70790/AT3G02460/AT4G28550/AT5G61980/AT4G13350/AT4G27100/AT3G09350/AT2G20560
GO:0004396	hexokinase activity	10	-0.620686	-1.35059	0.125234	0.613975	5008	tags=40%, list=25%, signal=30%	AT1G66430/AT3G20040/AT1G50460
GO:0009415	response to water	322	-0.290135	-1.171	0.125316	0.613975	2957	tags=20%, list=15%, signal=18%	AT1G02930/AT2G33700/AT3G12630/AT4G13860/AT5G67300/AT3G16800/AT5G05410/AT1G52400/AT1G76080/AT2G32795/AT2G22430/AT1G08930/AT4G07820/AT4G17615/AT1G07240/AT5G19000/AT5G58070/AT1G58440/AT3G52450/AT2G30870/AT2G41430/AT1G76180/AT4G04330/AT1G78080/AT5G27930/AT2G42540/AT3G61890/AT3G02130/AT1G12610/AT4G34240/AT4G20260/AT2G42620/AT5G59550/AT3G25880/AT1G12110/AT3G11410/AT5G35750/AT5G40390/AT1G20440/AT5G60820…
GO:0005887	integral component of plasma membrane	159	0.287171	1.19753	0.125828	0.614857	3690	tags=31%, list=18%, signal=25%	AT1G17810/AT1G73190/AT4G14390/AT3G24300/AT1G31820/AT5G53190/AT2G47160/AT2G25600/AT4G14400/AT1G27770/AT4G22200/AT1G64780/AT1G66570/AT2G46440/AT2G39060/AT4G03450/AT1G74810/AT4G03500/AT1G15460/AT5G49152/AT1G77990/AT5G40260/AT1G80760/AT3G02850/AT4G10380/AT1G21460/AT5G14870/AT1G55350/AT4G10770/AT1G28230/AT4G01470/AT5G05630/AT4G01840/AT1G07340/AT1G19780/AT1G48270/AT4G23400/AT5G46240/AT5G54250/AT4G35920…
GO:0009963	positive regulation of flavonoid biosynthetic process	10	0.570036	1.35107	0.126338	0.614857	2401	tags=30%, list=12%, signal=26%	AT1G32640/AT2G47460/AT2G26170
GO:0030515	snoRNA binding	22	0.46744	1.32485	0.127059	0.614857	7276	tags=64%, list=36%, signal=41%	AT1G06720/AT1G17690/AT4G25630/AT2G20490/AT5G16750/AT1G69070/AT3G12860/AT5G27120/AT3G05060/AT3G06530/AT5G08180/AT1G56110/AT3G21540/AT1G15440
GO:0043966	histone H3 acetylation	20	0.479518	1.34205	0.127273	0.614857	129	tags=10%, list=1%, signal=10%	AT5G36740/AT5G36670
GO:1902680	positive regulation of RNA biosynthetic process	297	0.254123	1.12775	0.127273	0.614857	2667	tags=16%, list=13%, signal=14%	AT1G32640/AT4G25490/AT5G61600/AT4G23810/AT5G51870/AT1G73870/AT5G22290/AT1G32770/AT1G46768/AT1G79180/AT3G61910/AT5G50080/AT4G18880/AT5G11470/AT3G24140/AT1G49010/AT5G44160/AT4G17880/AT5G13250/AT4G28500/AT4G39410/AT2G46770/AT5G26630/AT1G28470/AT5G48670/AT2G27230/AT4G01540/AT1G64490/AT3G10500/AT2G03710/AT5G47220/AT2G47460/AT1G04020/AT5G49430/AT2G38340/AT2G22540/AT5G61330/AT2G46680/AT4G09960/AT4G18390…
GO:1903508	positive regulation of nucleic acid-templated transcription	297	0.254123	1.12775	0.127273	0.614857	2667	tags=16%, list=13%, signal=14%	AT1G32640/AT4G25490/AT5G61600/AT4G23810/AT5G51870/AT1G73870/AT5G22290/AT1G32770/AT1G46768/AT1G79180/AT3G61910/AT5G50080/AT4G18880/AT5G11470/AT3G24140/AT1G49010/AT5G44160/AT4G17880/AT5G13250/AT4G28500/AT4G39410/AT2G46770/AT5G26630/AT1G28470/AT5G48670/AT2G27230/AT4G01540/AT1G64490/AT3G10500/AT2G03710/AT5G47220/AT2G47460/AT1G04020/AT5G49430/AT2G38340/AT2G22540/AT5G61330/AT2G46680/AT4G09960/AT4G18390…
GO:0015294	solute:cation symporter activity	61	-0.388132	-1.25343	0.127419	0.614857	2395	tags=26%, list=12%, signal=23%	AT2G20780/AT1G71880/AT1G08930/AT5G23270/AT3G19930/AT1G08890/AT5G40890/AT3G05155/AT1G11260/AT3G47960/AT1G19450/AT4G13420/AT1G75220/AT4G36670/AT3G27170
GO:0009700	indole phytoalexin biosynthetic process	11	0.562778	1.35012	0.127706	0.614857	2612	tags=45%, list=13%, signal=40%	AT2G38470/AT4G27260/AT3G45640/AT3G26830/AT2G43000
GO:0046217	indole phytoalexin metabolic process	11	0.562778	1.35012	0.127706	0.614857	2612	tags=45%, list=13%, signal=40%	AT2G38470/AT4G27260/AT3G45640/AT3G26830/AT2G43000
GO:0052314	phytoalexin metabolic process	11	0.562778	1.35012	0.127706	0.614857	2612	tags=45%, list=13%, signal=40%	AT2G38470/AT4G27260/AT3G45640/AT3G26830/AT2G43000
GO:0052315	phytoalexin biosynthetic process	11	0.562778	1.35012	0.127706	0.614857	2612	tags=45%, list=13%, signal=40%	AT2G38470/AT4G27260/AT3G45640/AT3G26830/AT2G43000
GO:0045893	positive regulation of transcription, DNA-templated	293	0.254793	1.12407	0.127854	0.614857	2667	tags=16%, list=13%, signal=14%	AT1G32640/AT4G25490/AT5G61600/AT4G23810/AT5G51870/AT1G73870/AT5G22290/AT1G32770/AT1G46768/AT1G79180/AT3G61910/AT5G50080/AT4G18880/AT5G11470/AT3G24140/AT1G49010/AT5G44160/AT4G17880/AT5G13250/AT4G28500/AT4G39410/AT2G46770/AT5G26630/AT1G28470/AT5G48670/AT2G27230/AT4G01540/AT1G64490/AT3G10500/AT2G03710/AT5G47220/AT2G47460/AT1G04020/AT5G49430/AT2G38340/AT2G22540/AT5G61330/AT2G46680/AT4G09960/AT5G12870…
GO:0004386	helicase activity	171	0.286626	1.19958	0.127946	0.614857	6721	tags=43%, list=33%, signal=29%	AT1G51380/AT1G05460/AT5G04895/AT2G24250/AT5G19210/AT1G20720/AT1G48650/AT3G09660/AT5G27680/AT3G12810/AT1G08060/AT4G01020/AT1G03190/AT5G63630/AT2G35340/AT4G35740/AT3G02060/AT4G15850/AT1G79890/AT2G36720/AT3G25100/AT2G45810/AT1G06670/AT2G40700/AT2G07690/AT5G08620/AT5G10370/AT1G44900/AT3G13920/AT4G17020/AT1G10930/AT5G20420/AT5G26742/AT4G02060/AT1G26370/AT3G20010/AT2G06990/AT5G44635/AT3G06010/AT1G31360…
GO:0016405	CoA-ligase activity	22	-0.496865	-1.32802	0.12825	0.615381	4100	tags=45%, list=20%, signal=36%	AT1G51680/AT3G16170/AT3G48990/AT1G66120/AT4G23850/AT1G62940/AT5G36880/AT1G65880/AT3G21230
GO:0006974	cellular response to DNA damage stimulus	301	0.253035	1.12422	0.12844	0.615381	7178	tags=42%, list=35%, signal=27%	AT3G01600/AT3G27630/AT1G14460/AT4G24790/AT4G31400/AT2G24250/AT4G02070/AT4G18820/AT5G06460/AT3G24320/AT2G21800/AT1G04020/AT1G20720/AT4G02390/AT5G01780/AT4G31150/AT5G64630/AT3G09660/AT5G61330/AT3G48187/AT3G20820/AT5G15920/AT5G27680/AT3G10010/AT3G18524/AT3G15150/AT3G27060/AT1G65470/AT4G10180/AT5G54260/AT4G30870/AT5G45720/AT3G61420/AT2G31320/AT1G03190/AT2G02480/AT4G36050/AT5G40820/AT4G35740/AT1G79890…
GO:0000741	karyogamy	24	0.453586	1.30536	0.128878	0.615381	3609	tags=42%, list=18%, signal=34%	AT4G00120/AT2G35940/AT1G31460/AT1G24450/AT1G19520/AT2G34260/AT2G20490/AT3G03810/AT5G45275/AT5G23420
GO:0010197	polar nucleus fusion	24	0.453586	1.30536	0.128878	0.615381	3609	tags=42%, list=18%, signal=34%	AT4G00120/AT2G35940/AT1G31460/AT1G24450/AT1G19520/AT2G34260/AT2G20490/AT3G03810/AT5G45275/AT5G23420
GO:0010563	negative regulation of phosphorus metabolic process	32	0.410283	1.28467	0.129187	0.615381	2635	tags=28%, list=13%, signal=25%	AT1G29770/AT3G50630/AT1G79030/AT2G20470/AT1G01760/AT5G63190/AT5G57050/AT2G32710/AT2G23430
GO:0045936	negative regulation of phosphate metabolic process	32	0.410283	1.28467	0.129187	0.615381	2635	tags=28%, list=13%, signal=25%	AT1G29770/AT3G50630/AT1G79030/AT2G20470/AT1G01760/AT5G63190/AT5G57050/AT2G32710/AT2G23430
GO:0016878	acid-thiol ligase activity	25	-0.476589	-1.3215	0.129693	0.616049	4100	tags=48%, list=20%, signal=38%	AT2G20420/AT3G21240/AT1G51680/AT3G16170/AT3G48990/AT1G66120/AT4G23850/AT1G62940/AT5G36880/AT1G65880/AT3G21230
GO:0051046	regulation of secretion	13	-0.573613	-1.36119	0.129893	0.616049	6317	tags=77%, list=31%, signal=53%	AT5G59840/AT3G46060/AT3G51300/AT2G27350/AT5G16490/AT5G50440/AT4G30600/AT4G19720/AT5G03520
GO:1903530	regulation of secretion by cell	13	-0.573613	-1.36119	0.129893	0.616049	6317	tags=77%, list=31%, signal=53%	AT5G59840/AT3G46060/AT3G51300/AT2G27350/AT5G16490/AT5G50440/AT4G30600/AT4G19720/AT5G03520
GO:0009414	response to water deprivation	315	-0.287809	-1.15794	0.130602	0.616957	2957	tags=21%, list=15%, signal=18%	AT1G02930/AT2G33700/AT3G12630/AT4G13860/AT5G67300/AT3G16800/AT5G05410/AT1G52400/AT1G76080/AT2G32795/AT2G22430/AT1G08930/AT4G07820/AT4G17615/AT1G07240/AT5G19000/AT5G58070/AT1G58440/AT3G52450/AT2G30870/AT2G41430/AT1G76180/AT4G04330/AT1G78080/AT5G27930/AT2G42540/AT3G61890/AT3G02130/AT1G12610/AT4G34240/AT4G20260/AT2G42620/AT5G59550/AT3G25880/AT1G12110/AT3G11410/AT5G35750/AT5G40390/AT1G20440/AT5G60820…
GO:0031461	cullin-RING ubiquitin ligase complex	132	-0.333136	-1.23348	0.130624	0.616957	2455	tags=13%, list=12%, signal=11%	AT5G63160/AT1G31350/AT2G01330/AT1G12820/AT2G25740/AT3G26810/AT2G42620/AT2G02870/AT1G02670/AT5G52250/AT3G27220/AT2G30600/AT1G15670/AT1G14330/AT5G67480/AT5G25350
GO:0023052	signaling	43	0.381659	1.2586	0.130769	0.616957	565	tags=5%, list=3%, signal=5%	AT2G01505/AT5G59305
GO:0045281	succinate dehydrogenase complex	10	-0.615406	-1.3391	0.130841	0.616957	6954	tags=80%, list=34%, signal=53%	AT1G47420/AT5G62575/AT1G08480/AT5G66760/AT3G27380/AT5G40650/AT5G67490
GO:0042214	terpene metabolic process	13	-0.571595	-1.3564	0.131673	0.618862	1992	tags=31%, list=10%, signal=28%	AT4G32810/AT4G36810/AT3G25180
GO:0006595	polyamine metabolic process	22	-0.493519	-1.31908	0.131716	0.618862	3902	tags=50%, list=19%, signal=40%	AT5G15950/AT3G02470/AT1G28680/AT5G07080/AT4G08870/AT4G34710/AT3G59050/AT3G17717/AT3G25570/AT1G65840
GO:0009966	regulation of signal transduction	290	-0.29081	-1.16377	0.13198	0.618862	2800	tags=18%, list=14%, signal=16%	AT5G67300/AT1G30135/AT1G52400/AT5G66730/AT2G22430/AT2G32550/AT1G13460/AT1G24625/AT3G57120/AT1G66350/AT2G34600/AT3G63010/AT5G52200/AT5G41790/AT2G41230/AT1G74330/AT4G03110/AT3G51550/AT3G17980/AT2G01540/AT4G39070/AT1G10560/AT1G70790/AT3G23150/AT2G25490/AT5G65160/AT1G35670/AT3G11410/AT1G15100/AT3G17860/AT5G10720/AT1G74950/AT1G70700/AT5G46590/AT1G51800/AT2G01150/AT1G72450/AT5G17490/AT3G02140/AT3G22275…
GO:0006333	chromatin assembly or disassembly	21	0.466914	1.31857	0.132251	0.618862	7160	tags=57%, list=35%, signal=37%	AT5G64630/AT4G39100/AT1G65470/AT3G44530/AT3G15120/AT5G16940/AT4G09550/AT1G73790/AT1G57820/AT5G18620/AT4G22140/AT3G51880
GO:0016881	acid-amino acid ligase activity	23	0.455919	1.30383	0.132388	0.618862	902	tags=17%, list=4%, signal=17%	AT4G27260/AT4G37390/AT1G63680/AT5G54510
GO:0034765	regulation of ion transmembrane transport	28	-0.459333	-1.29046	0.132404	0.618862	4045	tags=50%, list=20%, signal=40%	AT1G53110/AT4G05590/AT5G42960/AT5G62000/AT1G02410/AT4G33950/AT2G17290/AT4G23650/AT1G09995/AT4G27500/AT1G35670/AT3G11410/AT5G46330
GO:0016477	cell migration	10	-0.614482	-1.33709	0.13271	0.618862	1275	tags=40%, list=6%, signal=38%	AT1G43860/AT3G51110/AT1G19310
GO:0015804	neutral amino acid transport	10	0.563526	1.33564	0.132762	0.618862	1479	tags=20%, list=7%, signal=19%	AT4G38250/AT2G39890
GO:0009581	detection of external stimulus	76	-0.373142	-1.25178	0.133648	0.620243	1815	tags=14%, list=9%, signal=13%	AT1G52520/AT1G31480/AT5G41730/AT5G04190/AT5G61270/AT1G18810/AT1G02340/AT4G16780/AT1G14280/AT2G02950
GO:0009582	detection of abiotic stimulus	76	-0.373142	-1.25178	0.133648	0.620243	1815	tags=14%, list=9%, signal=13%	AT1G52520/AT1G31480/AT5G41730/AT5G04190/AT5G61270/AT1G18810/AT1G02340/AT4G16780/AT1G14280/AT2G02950
GO:0006862	nucleotide transport	15	-0.550435	-1.33687	0.133929	0.620243	3577	tags=33%, list=18%, signal=27%	AT1G14560/AT5G07320/AT5G27520/AT5G61810
GO:0009608	response to symbiont	15	-0.552208	-1.34118	0.133929	0.620243	2451	tags=40%, list=12%, signal=35%	AT3G09260/AT3G50480/AT1G19570/AT3G09940/AT5G52310
GO:0010413	glucuronoxylan metabolic process	11	0.556179	1.33428	0.134199	0.620243	5353	tags=64%, list=26%, signal=47%	AT5G54690/AT4G36890/AT1G27440/AT3G18660/AT1G19300/AT4G33330/AT2G37090
GO:0010417	glucuronoxylan biosynthetic process	11	0.556179	1.33428	0.134199	0.620243	5353	tags=64%, list=26%, signal=47%	AT5G54690/AT4G36890/AT1G27440/AT3G18660/AT1G19300/AT4G33330/AT2G37090
GO:0060090	molecular adaptor activity	31	0.417518	1.29165	0.134615	0.621287	2880	tags=13%, list=14%, signal=11%	AT4G15248/AT5G54470/AT4G25910/AT2G47450
GO:0080036	regulation of cytokinin-activated signaling pathway	11	-0.602068	-1.34529	0.135185	0.623036	291	tags=36%, list=1%, signal=36%	AT2G25180/AT3G59940/AT1G15670
GO:0048831	regulation of shoot system development	208	0.27207	1.15806	0.135531	0.623467	3454	tags=23%, list=17%, signal=19%	AT2G45680/AT3G21150/AT4G15248/AT3G18550/AT3G54720/AT5G51870/AT1G20823/AT5G54470/AT2G01830/AT5G22290/AT3G50870/AT5G03680/AT1G06180/AT2G40750/AT3G56400/AT1G49010/AT5G13250/AT5G48170/AT4G25530/AT5G38200/AT2G31650/AT5G57520/AT5G05690/AT5G24860/AT1G75820/AT2G40080/AT5G56860/AT5G13290/AT2G22540/AT1G27320/AT1G55350/AT1G68640/AT2G25930/AT2G30140/AT2G43000/AT4G10090/AT1G68800/AT1G26260/AT5G49660/AT1G66400…
GO:0071900	regulation of protein serine/threonine kinase activity	43	0.379062	1.25003	0.135897	0.623467	2635	tags=21%, list=13%, signal=18%	AT3G60550/AT3G50630/AT2G45080/AT3G45640/AT2G20470/AT3G21870/AT5G63190/AT2G32710/AT2G23430
GO:0004675	transmembrane receptor protein serine/threonine kinase activity	157	0.287923	1.19467	0.136213	0.623467	4309	tags=38%, list=21%, signal=30%	AT1G65800/AT4G30520/AT2G01950/AT5G47070/AT4G35030/AT3G45410/AT5G23170/AT3G05140/AT3G08760/AT1G21590/AT1G77280/AT1G60800/AT2G33580/AT4G21380/AT1G72540/AT4G34440/AT3G09780/AT1G69790/AT2G42960/AT1G20650/AT5G06820/AT2G18890/AT4G13190/AT5G46570/AT3G25560/AT2G05940/AT4G02010/AT1G24030/AT2G40270/AT2G28250/AT3G13065/AT4G32000/AT3G01840/AT5G58540/AT1G11130/AT5G37790/AT2G20850/AT1G80870/AT3G01300/AT3G55450…
GO:0008793	aromatic-amino-acid:2-oxoglutarate aminotransferase activity	11	-0.600306	-1.34136	0.137037	0.623467	6667	tags=82%, list=33%, signal=55%	AT5G10330/AT1G62800/AT4G31990/AT5G11520/AT2G30970/AT5G19550/AT2G22250/AT1G71920
GO:0070546	L-phenylalanine aminotransferase activity	11	-0.600306	-1.34136	0.137037	0.623467	6667	tags=82%, list=33%, signal=55%	AT5G10330/AT1G62800/AT4G31990/AT5G11520/AT2G30970/AT5G19550/AT2G22250/AT1G71920
GO:0080130	L-phenylalanine:2-oxoglutarate aminotransferase activity	11	-0.600306	-1.34136	0.137037	0.623467	6667	tags=82%, list=33%, signal=55%	AT5G10330/AT1G62800/AT4G31990/AT5G11520/AT2G30970/AT5G19550/AT2G22250/AT1G71920
GO:0009698	phenylpropanoid metabolic process	131	-0.330721	-1.22022	0.137371	0.623467	3457	tags=25%, list=17%, signal=21%	AT2G39410/AT4G34230/AT1G61820/AT4G30210/AT3G62160/AT1G76470/AT1G09500/AT3G23590/AT5G66390/AT1G66270/AT5G41040/AT3G53260/AT2G30490/AT3G11430/AT5G48100/AT1G64160/AT1G77420/AT4G37990/AT5G48930/AT3G02130/AT1G67980/AT3G44550/AT5G05340/AT3G56700/AT5G22500/AT3G21230/AT4G11180/AT5G01040/AT3G17390/AT2G40230/AT5G01050/AT4G01070
GO:0032592	integral component of mitochondrial membrane	28	-0.458426	-1.28791	0.137631	0.623467	5310	tags=46%, list=26%, signal=34%	AT1G20350/AT1G53760/AT4G05590/AT2G28900/AT1G02410/AT5G15640/AT1G72750/AT1G04070/AT5G48970/AT3G20040/AT1G06530/AT1G50460
GO:0009642	response to light intensity	143	-0.325728	-1.21512	0.137733	0.623467	2851	tags=26%, list=14%, signal=22%	AT2G28190/AT5G61230/AT2G47180/AT4G28610/AT4G06634/AT1G17420/AT3G47860/AT3G03370/AT2G41100/AT1G70000/AT1G69935/AT2G45400/AT3G18780/AT3G59060/AT4G15400/AT5G58070/AT1G08830/AT2G41430/AT1G07350/AT2G06850/AT2G29500/AT2G26150/AT2G42540/AT4G12400/AT5G24810/AT1G54050/AT1G02340/AT5G20230/AT1G05347/AT1G74310/AT1G61800/AT3G51910/AT3G12580/AT1G01470/AT2G17840/AT2G46240
GO:0097708	intracellular vesicle	399	-0.278841	-1.14539	0.137931	0.623467	4838	tags=26%, list=24%, signal=20%	AT1G16020/AT3G61130/AT3G12400/AT3G49720/AT2G22900/AT1G18630/AT2G20810/AT4G37690/AT5G39510/AT4G19640/AT5G11710/AT4G29140/AT3G62830/AT2G38410/AT2G37840/AT1G71900/AT2G26890/AT3G14270/AT5G25250/AT2G30330/AT1G75210/AT1G55830/AT3G15730/AT3G66654/AT5G66120/AT3G23870/AT5G45550/AT4G16144/AT5G65270/AT4G08500/AT2G40280/AT5G45130/AT1G32410/AT1G08720/AT1G67330/AT3G11530/AT2G43160/AT2G38360/AT2G40380/AT5G16830…
GO:0010492	maintenance of shoot apical meristem identity	12	0.541686	1.33099	0.138322	0.623467	2945	tags=50%, list=14%, signal=43%	AT1G69440/AT2G31160/AT4G37750/AT1G04020/AT5G48160/AT5G44280
GO:0042054	histone methyltransferase activity	43	0.377712	1.24558	0.138462	0.623467	5191	tags=40%, list=26%, signal=29%	AT5G53430/AT2G31650/AT2G44150/AT5G04940/AT4G25630/AT2G35160/AT3G61740/AT4G15180/AT4G02020/AT1G77300/AT2G23740/AT3G20810/AT1G04050/AT3G06930/AT5G43990/AT3G12270/AT4G31120
GO:0000578	embryonic axis specification	11	0.550136	1.31979	0.138528	0.623467	3297	tags=64%, list=16%, signal=53%	AT1G23080/AT1G69270/AT1G28560/AT5G59340/AT1G19850/AT1G13980/AT5G56270
GO:0016783	sulfurtransferase activity	14	0.537922	1.36529	0.138636	0.623467	44	tags=7%, list=0%, signal=7%	AT5G65720
GO:0045824	negative regulation of innate immune response	20	0.472685	1.32292	0.138636	0.623467	4514	tags=35%, list=22%, signal=27%	AT4G14465/AT1G79030/AT1G20900/AT1G03160/AT4G18470/AT5G62570/AT5G28390
GO:1902290	positive regulation of defense response to oomycetes	20	0.472688	1.32293	0.138636	0.623467	2962	tags=30%, list=15%, signal=26%	AT4G14390/AT4G14400/AT4G03450/AT4G03500/AT5G39420/AT4G05040
GO:0045273	respiratory chain complex II	11	-0.599411	-1.33936	0.138889	0.623467	6954	tags=82%, list=34%, signal=54%	AT1G47420/AT5G62575/AT1G08480/AT4G32210/AT5G09600/AT5G66760/AT3G27380/AT5G40650
GO:0020037	heme binding	271	-0.291547	-1.15981	0.138996	0.623467	3246	tags=26%, list=16%, signal=22%	AT3G53130/AT2G45580/AT1G26340/AT1G16400/AT1G50520/AT1G13710/AT4G10040/AT1G01190/AT4G30170/AT1G49570/AT4G31500/AT1G16410/AT2G23190/AT1G19630/AT2G30770/ATCG00720/AT2G22330/AT4G13310/AT4G31950/AT5G66390/AT3G49120/ATCG00580/AT3G01190/AT5G36220/AT2G45970/AT4G11290/AT3G53300/AT2G30490/AT3G52970/AT1G05240/AT1G68850/AT2G30750/AT1G33720/AT3G03670/AT2G46650/AT4G00360/AT5G19880/AT5G42650/AT1G07890/AT3G14680…
GO:0050777	negative regulation of immune response	23	0.452545	1.29418	0.13948	0.623467	4514	tags=35%, list=22%, signal=27%	AT4G14465/AT1G79030/AT1G20900/AT2G33550/AT1G03160/AT4G18470/AT5G62570/AT5G28390
GO:0002229	defense response to oomycetes	35	-0.439307	-1.28546	0.139693	0.623467	3760	tags=43%, list=19%, signal=35%	AT1G08720/AT5G10530/AT1G56510/AT2G43700/AT1G15530/AT1G74330/AT5G24530/AT4G10500/AT5G60300/AT3G23550/AT4G10490/AT5G60270/AT5G24660/AT3G59740
GO:0009251	glucan catabolic process	52	0.359648	1.24411	0.139842	0.623467	2570	tags=19%, list=13%, signal=17%	AT5G17523/AT1G64390/AT1G71380/AT5G63250/AT5G63230/AT4G11050/AT1G70710/AT4G23560/AT4G39010/AT3G47040
GO:0010212	response to ionizing radiation	28	0.428946	1.28969	0.140187	0.623467	7309	tags=61%, list=36%, signal=39%	AT3G01600/AT3G10140/AT5G40820/AT1G80210/AT3G22880/AT4G37490/AT5G48720/AT1G07745/AT3G05210/AT3G19210/AT5G64520/AT5G06150/AT2G19490/AT4G29170/AT3G02680/AT1G27840/AT4G21070
GO:0009624	response to nematode	73	0.335602	1.22783	0.140496	0.623467	2885	tags=27%, list=14%, signal=24%	AT5G17523/AT3G45680/AT2G30080/AT5G14940/AT1G64780/AT4G24780/AT2G36910/AT2G38120/AT2G21050/AT5G13740/AT3G60970/AT3G51860/AT2G29650/AT5G53550/AT1G60960/AT1G58340/AT3G60160/AT5G06680/AT5G46040/AT1G20840
GO:0032296	double-stranded RNA-specific ribonuclease activity	12	0.532831	1.30923	0.14059	0.623467	2475	tags=33%, list=12%, signal=29%	AT3G20420/AT5G51080/AT1G24450/AT3G13740
GO:0070475	rRNA base methylation	12	0.533767	1.31153	0.14059	0.623467	6801	tags=58%, list=33%, signal=39%	AT4G26600/AT2G21070/AT5G26180/AT1G22270/AT2G39670/AT5G57280/AT3G13180
GO:0062013	positive regulation of small molecule metabolic process	24	-0.474761	-1.30422	0.140652	0.623467	2456	tags=25%, list=12%, signal=22%	AT3G26790/AT3G27785/AT3G04070/AT1G54540/AT5G61780
GO:0030334	regulation of cell migration	11	0.545313	1.30822	0.140693	0.623467	7941	tags=73%, list=39%, signal=44%	AT1G01760/AT2G14825/AT4G40050/AT1G53165/AT2G24280/AT3G15610/AT5G01160/AT3G03570
GO:0043295	glutathione binding	12	-0.587913	-1.35488	0.14082	0.623467	5735	tags=83%, list=28%, signal=60%	AT5G42150/AT1G17170/AT1G02920/AT1G02930/AT5G27380/AT4G02520/AT2G47730/AT2G30870/AT2G29450
GO:1900750	oligopeptide binding	12	-0.587913	-1.35488	0.14082	0.623467	5735	tags=83%, list=28%, signal=60%	AT5G42150/AT1G17170/AT1G02920/AT1G02930/AT5G27380/AT4G02520/AT2G47730/AT2G30870/AT2G29450
GO:0009904	chloroplast accumulation movement	19	0.485876	1.32405	0.142191	0.628685	4088	tags=53%, list=20%, signal=42%	AT1G66840/AT3G13190/AT2G38370/AT3G56270/AT2G40480/AT5G42880/AT3G45780/AT1G75720/AT1G75100/AT3G51720
GO:0035250	UDP-galactosyltransferase activity	10	0.560833	1.32926	0.143469	0.632801	3016	tags=50%, list=15%, signal=43%	AT1G56600/AT1G60470/AT3G09020/AT1G26810/AT2G11810
GO:0019220	regulation of phosphate metabolic process	129	-0.330484	-1.2169	0.143704	0.632801	3063	tags=17%, list=15%, signal=15%	AT2G01690/AT5G47790/AT4G08960/AT2G44740/AT4G17870/AT2G32550/AT5G52200/AT2G31305/AT3G05327/AT5G23600/AT3G07980/AT3G54320/AT3G19150/AT1G53570/AT3G13530/AT1G07150/AT5G67080/AT4G26890/AT2G32510/AT5G55090/AT5G46790
GO:0051174	regulation of phosphorus metabolic process	129	-0.330484	-1.2169	0.143704	0.632801	3063	tags=17%, list=15%, signal=15%	AT2G01690/AT5G47790/AT4G08960/AT2G44740/AT4G17870/AT2G32550/AT5G52200/AT2G31305/AT3G05327/AT5G23600/AT3G07980/AT3G54320/AT3G19150/AT1G53570/AT3G13530/AT1G07150/AT5G67080/AT4G26890/AT2G32510/AT5G55090/AT5G46790
GO:0070069	cytochrome complex	20	-0.499706	-1.28957	0.144128	0.633814	6095	tags=45%, list=30%, signal=32%	AT3G27240/AT1G51980/AT3G15640/AT3G02090/AT4G37830/AT5G13440/AT1G52710/AT5G25450
GO:1902495	transmembrane transporter complex	11	-0.596541	-1.33294	0.144444	0.63435	2850	tags=45%, list=14%, signal=39%	AT4G08960/AT1G73020/AT5G40890/AT3G27170
GO:0009269	response to desiccation	17	0.506393	1.33622	0.145161	0.636498	2955	tags=29%, list=15%, signal=25%	AT1G32640/AT1G48130/AT3G62730/AT1G47980/AT2G05070
GO:0044093	positive regulation of molecular function	144	-0.321695	-1.2006	0.145324	0.636498	4701	tags=24%, list=23%, signal=19%	AT5G45190/AT5G12980/AT1G70810/AT4G08470/AT4G36950/AT2G35035/AT3G13990/AT1G70800/AT5G37740/AT3G47940/AT1G05100/AT1G02410/AT4G11920/AT4G19600/AT4G08960/AT2G32550/AT4G28480/AT5G15930/AT3G17980/AT2G01540/AT3G07980/AT3G07890/AT5G52580/AT1G70790/AT3G02460/AT4G28550/AT1G53570/AT3G13530/AT1G07150/AT4G27100/AT5G67080/AT4G26890/AT2G32510/AT5G55090
GO:0015297	antiporter activity	137	-0.324219	-1.20042	0.145588	0.636802	1933	tags=14%, list=10%, signal=13%	AT5G41610/AT3G01550/AT1G53210/AT1G11670/AT4G23010/AT4G39030/AT4G23030/AT5G17850/AT5G27520/AT2G04040/AT1G15150/AT1G29025/AT5G01490/AT3G23550/AT5G17860/AT5G09470/AT1G12950/AT5G44050
GO:0009635	response to herbicide	14	-0.558626	-1.34204	0.145907	0.637344	4813	tags=64%, list=24%, signal=49%	ATCG00020/AT3G47860/AT4G27940/AT1G17190/AT2G46320/AT5G58070/AT2G43570/AT1G12110
GO:0031301	integral component of organelle membrane	124	0.291942	1.16643	0.146269	0.63772	675	tags=4%, list=3%, signal=4%	AT3G12030/AT4G14390/AT5G50650/AT4G16160/AT4G14400
GO:0046174	polyol catabolic process	16	-0.529626	-1.30291	0.146384	0.63772	2389	tags=50%, list=12%, signal=44%	AT1G31190/AT1G80460/AT5G56640/AT3G55440/AT4G18010/AT1G14520/AT2G19800
GO:0098799	outer mitochondrial membrane protein complex	11	0.541362	1.29874	0.147186	0.640358	1346	tags=18%, list=7%, signal=17%	AT3G27070/AT4G04180
GO:1990939	ATP-dependent microtubule motor activity	14	0.531158	1.34813	0.147727	0.641124	6305	tags=86%, list=31%, signal=59%	AT5G47820/AT4G26660/AT3G20150/AT4G14330/AT5G33300/AT5G65930/AT4G21270/AT3G45850/AT2G28620/AT2G36200/AT2G37420/AT5G60930
GO:0009527	plastid outer membrane	52	0.355718	1.23051	0.147757	0.641124	4643	tags=35%, list=23%, signal=27%	AT4G15810/AT4G16160/AT1G11070/AT1G62510/AT1G07120/AT4G02482/AT2G16640/AT3G06510/AT4G36650/AT2G11810/AT4G12470/AT1G52080/AT1G03160/AT2G44640/AT4G02510/AT4G18570/AT5G19620/AT4G27440
GO:0008474	palmitoyl-(protein) hydrolase activity	11	-0.594046	-1.32737	0.148148	0.641124	3081	tags=45%, list=15%, signal=39%	AT4G22305/AT4G17480/AT5G47330/AT4G17470
GO:0098599	palmitoyl hydrolase activity	11	-0.594046	-1.32737	0.148148	0.641124	3081	tags=45%, list=15%, signal=39%	AT4G22305/AT4G17480/AT5G47330/AT4G17470
GO:0016441	posttranscriptional gene silencing	28	0.42466	1.27681	0.149533	0.646104	5179	tags=32%, list=25%, signal=24%	AT1G69440/AT1G05460/AT1G66700/AT1G63020/AT4G11130/AT4G13940/AT3G23780/AT1G32490/AT1G76630
GO:0045275	respiratory chain complex III	12	-0.579129	-1.33464	0.149733	0.646104	6095	tags=50%, list=30%, signal=35%	AT3G27240/AT1G51980/AT3G02090/AT5G13440/AT5G25450
GO:0008271	secondary active sulfate transmembrane transporter activity	10	0.557719	1.32188	0.149893	0.646104	6410	tags=60%, list=32%, signal=41%	AT1G77990/AT3G51895/AT3G15990/AT5G19600/AT1G23090/AT3G12520
GO:0008047	enzyme activator activity	112	-0.330459	-1.18827	0.150522	0.647958	4459	tags=25%, list=22%, signal=20%	AT1G70810/AT5G46750/AT3G08910/AT1G73110/AT1G70800/AT3G15730/AT5G37740/AT3G47940/AT2G26590/AT2G37550/AT5G50550/AT3G17660/AT4G08960/AT4G28480/AT5G15930/AT1G23490/AT3G17980/AT2G01540/AT3G07890/AT5G52580/AT1G70790/AT3G02460/AT4G28550/AT5G61980/AT4G13350/AT4G27100/AT2G20560
GO:0015295	solute:proton symporter activity	57	-0.388347	-1.24338	0.152244	0.651565	2395	tags=26%, list=12%, signal=23%	AT2G20780/AT1G71880/AT1G08930/AT5G23270/AT3G19930/AT1G08890/AT5G40890/AT3G05155/AT1G11260/AT3G47960/AT1G19450/AT1G75220/AT4G36670/AT3G27170
GO:0051784	negative regulation of nuclear division	13	0.523022	1.30556	0.152273	0.651565	2360	tags=31%, list=12%, signal=27%	AT1G13448/AT1G69400/AT3G18524/AT1G49910
GO:0016628	oxidoreductase activity, acting on the CH-CH group of donors, NAD or NADP as acceptor	40	-0.42524	-1.27614	0.152284	0.651565	2426	tags=25%, list=12%, signal=22%	AT3G52940/AT4G24220/AT5G17000/AT5G16970/AT5G58750/AT1G76680/AT5G16980/AT1G76690/AT2G06050
GO:0019941	modification-dependent protein catabolic process	394	-0.277543	-1.14003	0.152334	0.651565	2084	tags=14%, list=10%, signal=13%	AT3G18980/AT2G22690/AT3G17280/AT5G63160/AT5G52060/AT1G26800/AT5G50430/AT1G66660/AT2G42350/AT5G43190/AT1G79110/AT3G61460/AT4G35480/AT2G25740/AT5G64920/AT4G15410/AT2G22010/AT3G13672/AT2G41980/AT5G39250/AT3G19470/AT3G18773/AT2G42030/AT2G25490/AT5G59550/AT2G39720/AT3G62690/AT4G17895/AT5G05810/AT1G25150/AT2G35000/AT5G26260/AT2G37580/AT1G15100/AT2G02870/AT5G60820/AT3G09350/AT2G35910/AT2G01150/AT2G22890…
GO:0031982	vesicle	475	-0.271794	-1.12776	0.152358	0.651565	4768	tags=25%, list=23%, signal=20%	AT3G12400/AT3G49720/AT2G22900/AT1G18630/AT2G20810/AT4G37690/AT5G39510/AT4G19640/AT5G11710/AT4G29140/AT3G62830/AT2G38410/AT2G37840/AT1G71900/AT3G08910/AT2G26890/AT3G14270/AT3G49320/AT5G25250/AT1G21660/AT2G30330/AT1G75210/AT1G55830/AT2G47410/AT3G15730/AT3G66654/AT5G66120/AT3G23870/AT5G45550/AT4G16144/AT5G65270/AT4G02350/AT4G08500/AT3G47940/AT2G40280/AT5G45130/AT1G32410/AT1G08720/AT1G67330/AT3G11530…
GO:0034595	phosphatidylinositol phosphate 5-phosphatase activity	11	0.537086	1.28848	0.15368	0.652029	4219	tags=45%, list=21%, signal=36%	AT2G32010/AT1G05470/AT1G22620/AT2G35680/AT1G65580
GO:0043633	polyadenylation-dependent RNA catabolic process	11	0.538395	1.29162	0.15368	0.652029	8165	tags=73%, list=40%, signal=44%	AT2G25355/AT1G75660/AT5G42540/AT3G12990/AT3G60500/AT1G60080/AT5G35910/AT4G32175
GO:0006511	ubiquitin-dependent protein catabolic process	393	-0.277592	-1.14032	0.153752	0.652029	2084	tags=15%, list=10%, signal=13%	AT3G18980/AT2G22690/AT3G17280/AT5G63160/AT5G52060/AT1G26800/AT5G50430/AT1G66660/AT2G42350/AT5G43190/AT1G79110/AT3G61460/AT4G35480/AT2G25740/AT5G64920/AT4G15410/AT2G22010/AT3G13672/AT2G41980/AT5G39250/AT3G19470/AT3G18773/AT2G42030/AT2G25490/AT5G59550/AT2G39720/AT3G62690/AT4G17895/AT5G05810/AT1G25150/AT2G35000/AT5G26260/AT2G37580/AT1G15100/AT2G02870/AT5G60820/AT3G09350/AT2G35910/AT2G01150/AT2G22890…
GO:0046578	regulation of Ras protein signal transduction	10	0.555888	1.31754	0.154176	0.652029	5093	tags=60%, list=25%, signal=45%	AT4G24580/AT1G13980/AT5G39500/AT1G01960/AT4G38200/AT4G40050
GO:0051056	regulation of small GTPase mediated signal transduction	10	0.555888	1.31754	0.154176	0.652029	5093	tags=60%, list=25%, signal=45%	AT4G24580/AT1G13980/AT5G39500/AT1G01960/AT4G38200/AT4G40050
GO:0008645	hexose transmembrane transport	44	-0.413625	-1.27043	0.154723	0.652029	2395	tags=23%, list=12%, signal=20%	AT5G23270/AT3G19930/AT1G08890/AT3G05155/AT1G11260/AT1G19450/AT1G75220/AT3G16690/AT4G36670
GO:0015149	hexose transmembrane transporter activity	44	-0.413625	-1.27043	0.154723	0.652029	2395	tags=23%, list=12%, signal=20%	AT5G23270/AT3G19930/AT1G08890/AT3G05155/AT1G11260/AT1G19450/AT1G75220/AT3G16690/AT4G36670
GO:0071897	DNA biosynthetic process	24	0.443085	1.27514	0.155131	0.652029	5859	tags=46%, list=29%, signal=33%	AT1G20720/AT1G24290/AT5G40820/AT2G20490/AT2G29570/AT1G28260/AT1G07370/AT4G21520/AT1G66730/AT5G52800/AT3G07800
GO:0007166	cell surface receptor signaling pathway	203	0.268237	1.14155	0.155235	0.652029	4230	tags=34%, list=21%, signal=28%	AT1G16090/AT4G30520/AT5G47070/AT4G35030/AT5G23170/AT3G05140/AT3G08760/AT1G21590/AT1G77280/AT1G60800/AT2G33580/AT3G57640/AT1G72540/AT4G34440/AT1G21210/AT3G09780/AT1G69790/AT2G42960/AT1G20650/AT5G06820/AT1G69910/AT2G18890/AT4G13190/AT5G46570/AT5G66790/AT1G30860/AT3G25560/AT2G05940/AT4G02010/AT1G24030/AT2G40270/AT1G21240/AT2G28250/AT3G13065/AT1G66880/AT5G49430/AT4G32000/AT3G01840/AT5G58540/AT5G38210…
GO:0009523	photosystem II	32	0.39825	1.247	0.155502	0.652029	6746	tags=41%, list=33%, signal=27%	AT2G34420/AT1G51400/AT2G05070/AT5G54270/AT1G29920/AT3G08940/AT1G29910/AT1G67740/AT2G21970/AT3G27690/AT4G19100/AT2G34430/AT5G02120
GO:0015145	monosaccharide transmembrane transporter activity	45	-0.412521	-1.27529	0.155592	0.652029	2395	tags=22%, list=12%, signal=20%	AT5G23270/AT3G19930/AT1G08890/AT3G05155/AT1G11260/AT1G19450/AT1G75220/AT3G16690/AT4G36670
GO:0015749	monosaccharide transmembrane transport	45	-0.412521	-1.27529	0.155592	0.652029	2395	tags=22%, list=12%, signal=20%	AT5G23270/AT3G19930/AT1G08890/AT3G05155/AT1G11260/AT1G19450/AT1G75220/AT3G16690/AT4G36670
GO:0030246	carbohydrate binding	308	-0.283385	-1.13627	0.155727	0.652029	3262	tags=22%, list=16%, signal=19%	AT3G16470/AT1G11280/AT5G60280/AT4G33910/AT1G61550/AT3G59750/AT3G16440/AT1G05010/AT1G78850/AT2G43700/AT1G20270/AT2G39330/AT5G38240/AT3G16430/AT1G11330/AT1G15530/AT2G02230/AT5G06740/AT5G24080/AT3G45420/AT4G31100/AT4G32300/AT3G42850/AT1G61610/AT1G11340/AT2G39310/AT3G20040/AT2G42365/AT3G07320/AT3G57270/AT3G16410/AT2G25980/AT3G16420/AT2G42540/AT1G61440/AT1G16150/AT3G15356/AT3G16450/AT1G48740/AT1G48930…
GO:0031300	intrinsic component of organelle membrane	128	0.286872	1.1449	0.155763	0.652029	675	tags=4%, list=3%, signal=4%	AT3G12030/AT4G14390/AT5G50650/AT4G16160/AT4G14400
GO:0050662	coenzyme binding	405	-0.275764	-1.13538	0.156288	0.652029	5624	tags=31%, list=28%, signal=23%	AT5G14780/AT3G24170/AT4G13890/AT3G63510/AT2G19500/AT3G24200/AT4G27270/AT5G39320/AT1G14810/AT4G30470/AT4G08040/AT1G12160/AT4G38540/AT3G02280/AT5G03290/AT2G27860/AT1G24360/AT4G15765/AT2G17720/AT2G33590/AT5G11520/AT1G76490/AT2G20610/AT5G66760/AT4G39660/AT3G59760/AT1G04580/AT5G44720/AT5G15490/AT1G18270/AT2G36680/AT1G18020/AT5G03630/AT1G26570/AT1G12370/AT1G62600/AT2G30970/AT3G62830/AT5G44360/AT1G27980…
GO:0035065	regulation of histone acetylation	10	0.55188	1.30804	0.156317	0.652029	2833	tags=30%, list=14%, signal=26%	AT1G04020/AT4G39100/AT3G48430
GO:1901983	regulation of protein acetylation	10	0.55188	1.30804	0.156317	0.652029	2833	tags=30%, list=14%, signal=26%	AT1G04020/AT4G39100/AT3G48430
GO:2000756	regulation of peptidyl-lysine acetylation	10	0.55188	1.30804	0.156317	0.652029	2833	tags=30%, list=14%, signal=26%	AT1G04020/AT4G39100/AT3G48430
GO:0016860	intramolecular oxidoreductase activity	61	-0.382901	-1.23653	0.156452	0.652029	1647	tags=11%, list=8%, signal=11%	AT3G25780/AT5G05590/AT4G08930/AT3G02570/AT3G25770/AT3G25760
GO:0048268	clathrin coat assembly	14	-0.55208	-1.32631	0.156584	0.652029	2714	tags=29%, list=13%, signal=25%	AT1G25240/AT2G25430/AT1G05020
GO:0016779	nucleotidyltransferase activity	142	0.28433	1.1552	0.156863	0.652029	6103	tags=35%, list=30%, signal=25%	AT1G14460/AT4G24790/AT2G45150/AT4G14520/AT2G15400/AT4G18820/AT4G39210/AT5G14580/AT1G01220/AT1G68990/AT5G23690/AT5G15700/AT1G63020/AT2G41340/AT3G48830/AT1G67630/AT3G53920/AT5G45720/AT2G02480/AT5G22840/AT2G24120/AT1G22660/AT4G11130/AT3G57080/AT1G14790/AT2G35020/AT1G10520/AT1G06790/AT3G57660/AT3G25940/AT4G26850/AT4G30570/AT1G28090/AT5G67100/AT4G00060/AT3G56040/AT2G19910/AT3G23780/AT2G45620/AT1G31070…
GO:0032885	regulation of polysaccharide biosynthetic process	12	-0.571843	-1.31785	0.156863	0.652029	1263	tags=33%, list=6%, signal=31%	AT1G74350/AT3G02140/AT5G63370
GO:0071782	endoplasmic reticulum tubular network	14	-0.547891	-1.31625	0.158363	0.653085	1769	tags=43%, list=9%, signal=39%	AT3G25640/AT1G21050/AT4G23630/AT5G06990/AT2G24330
GO:0098827	endoplasmic reticulum subcompartment	14	-0.547891	-1.31625	0.158363	0.653085	1769	tags=43%, list=9%, signal=39%	AT3G25640/AT1G21050/AT4G23630/AT5G06990/AT2G24330
GO:0005355	glucose transmembrane transporter activity	43	-0.418117	-1.27975	0.158497	0.653085	2395	tags=23%, list=12%, signal=21%	AT5G23270/AT3G19930/AT1G08890/AT3G05155/AT1G11260/AT1G19450/AT1G75220/AT3G16690/AT4G36670
GO:0009962	regulation of flavonoid biosynthetic process	26	0.428181	1.25461	0.158654	0.653085	3107	tags=23%, list=15%, signal=20%	AT1G32640/AT1G19320/AT2G47460/AT2G26170/AT1G69690/AT5G49660
GO:0016074	snoRNA metabolic process	14	0.522793	1.3269	0.159091	0.653085	5394	tags=43%, list=27%, signal=32%	AT3G57150/AT4G25630/AT2G16650/AT2G25355/AT4G21900/AT3G46210
GO:0043144	snoRNA processing	14	0.522793	1.3269	0.159091	0.653085	5394	tags=43%, list=27%, signal=32%	AT3G57150/AT4G25630/AT2G16650/AT2G25355/AT4G21900/AT3G46210
GO:0016627	oxidoreductase activity, acting on the CH-CH group of donors	78	-0.358471	-1.20976	0.159375	0.653085	2426	tags=18%, list=12%, signal=16%	AT4G16760/AT3G52940/AT4G24220/AT5G17000/AT5G16970/AT3G20940/AT2G27000/AT5G58750/AT1G76680/AT5G16980/AT1G76690/AT5G16010/AT2G06050
GO:0046686	response to cadmium ion	298	-0.284582	-1.14006	0.159847	0.653085	4840	tags=26%, list=24%, signal=20%	AT4G17410/AT3G22890/AT2G47630/ATCG00490/AT4G38740/AT5G03630/AT5G11650/AT2G30970/AT4G13430/AT1G09780/AT3G13110/AT4G04460/AT5G59880/AT2G44350/AT5G44460/AT5G02790/AT2G23290/AT5G38830/AT5G42740/AT3G48990/AT2G19940/AT3G15730/AT5G07350/AT1G70000/AT1G02920/AT1G62740/AT4G23100/AT3G20390/AT3G12500/AT1G07590/AT2G39410/AT5G65140/AT1G17290/AT3G56240/AT5G02500/AT1G75040/AT1G02930/AT1G36370/AT5G67300/AT5G49910…
GO:0072598	protein localization to chloroplast	33	0.392033	1.2384	0.160287	0.653085	5147	tags=30%, list=25%, signal=23%	AT5G57180/AT4G15810/AT4G02482/AT2G47450/AT1G04945/AT5G22640/AT4G02510/AT5G14370/AT4G03320/AT2G04030
GO:0016638	oxidoreductase activity, acting on the CH-NH2 group of donors	36	-0.426356	-1.26067	0.160473	0.653085	3905	tags=28%, list=19%, signal=22%	AT2G25450/AT2G19590/AT1G05010/AT3G03910/AT4G29740/AT1G31710/AT5G07440/AT3G61400/AT2G30830
GO:0004439	phosphatidylinositol-4,5-bisphosphate 5-phosphatase activity	10	0.547663	1.29804	0.1606	0.653085	480	tags=20%, list=2%, signal=20%	AT2G32010/AT1G05470
GO:0106019	phosphatidylinositol-4,5-bisphosphate phosphatase activity	10	0.547663	1.29804	0.1606	0.653085	480	tags=20%, list=2%, signal=20%	AT2G32010/AT1G05470
GO:1901617	organic hydroxy compound biosynthetic process	143	0.282947	1.15444	0.160656	0.653085	2024	tags=12%, list=10%, signal=11%	AT4G15310/AT1G65670/AT3G14440/AT5G45340/AT2G41250/AT5G63560/AT5G26920/AT3G13730/AT1G52340/AT5G60510/AT5G05690/AT4G36380/AT3G48720/AT4G15393/AT2G47460/AT4G34135/AT4G12110
GO:0009310	amine catabolic process	10	-0.594683	-1.29401	0.160748	0.653085	2614	tags=60%, list=13%, signal=52%	AT4G34180/AT2G22330/AT3G59050/AT3G55840/AT1G65840
GO:0010962	regulation of glucan biosynthetic process	10	-0.593505	-1.29144	0.160748	0.653085	558	tags=30%, list=3%, signal=29%	AT3G02140/AT5G63370
GO:0042402	cellular biogenic amine catabolic process	10	-0.594683	-1.29401	0.160748	0.653085	2614	tags=60%, list=13%, signal=52%	AT4G34180/AT2G22330/AT3G59050/AT3G55840/AT1G65840
GO:0061387	regulation of extent of cell growth	10	-0.592826	-1.28997	0.160748	0.653085	1238	tags=50%, list=6%, signal=47%	AT4G35730/AT1G64110/AT3G13530/AT5G52882
GO:0098562	cytoplasmic side of membrane	10	-0.591883	-1.28791	0.160748	0.653085	2452	tags=50%, list=12%, signal=44%	AT1G14000/AT2G43850/AT5G58070/AT4G18950
GO:0004535	poly(A)-specific ribonuclease activity	16	0.502594	1.31707	0.16092	0.653085	1032	tags=19%, list=5%, signal=18%	AT1G61470/AT5G22250/AT3G44260
GO:0016482	cytosolic transport	39	-0.42561	-1.27349	0.161345	0.653997	6019	tags=62%, list=30%, signal=43%	AT1G75850/AT3G29100/AT5G53530/AT1G50970/AT4G33240/AT1G50500/AT1G79985/AT2G20320/AT4G39890/AT2G45980/AT5G56020/AT3G47810/AT5G39510/AT5G50440/AT2G26890/AT5G52210/AT3G14270/AT3G17440/AT1G34260/AT5G67290/AT5G64990/AT5G10260/AT3G02460
GO:0036294	cellular response to decreased oxygen levels	20	-0.491166	-1.26753	0.161922	0.654709	1878	tags=40%, list=9%, signal=36%	AT5G25250/AT4G31970/AT1G19250/AT3G03670/AT2G26150/AT4G37710/AT1G14550
GO:0071453	cellular response to oxygen levels	20	-0.491166	-1.26753	0.161922	0.654709	1878	tags=40%, list=9%, signal=36%	AT5G25250/AT4G31970/AT1G19250/AT3G03670/AT2G26150/AT4G37710/AT1G14550
GO:0055069	zinc ion homeostasis	10	0.546752	1.29589	0.162741	0.657207	5104	tags=70%, list=25%, signal=52%	AT2G38170/AT5G13740/AT3G51860/AT2G19110/AT4G30110/AT3G13772/AT1G68100
GO:0071456	cellular response to hypoxia	18	-0.505734	-1.28201	0.16341	0.657334	1878	tags=44%, list=9%, signal=40%	AT5G25250/AT4G31970/AT1G19250/AT3G03670/AT2G26150/AT4G37710/AT1G14550
GO:0099081	supramolecular polymer	221	0.262248	1.1221	0.163569	0.657334	6305	tags=43%, list=31%, signal=30%	AT4G17220/AT5G23430/AT1G13448/AT3G23090/AT5G62580/AT2G07170/AT4G24860/AT4G30710/AT4G23496/AT3G10310/AT1G14690/AT1G18410/AT2G33990/AT1G21730/AT3G15050/AT2G21300/AT1G11160/AT5G06680/AT1G54460/AT5G47820/AT3G27350/AT1G27920/AT2G14825/AT1G14840/AT4G27060/AT4G26660/AT1G77460/AT5G52360/AT5G18700/AT3G20150/AT1G01510/AT3G44050/AT5G54670/AT3G51150/AT3G04630/AT1G70950/AT4G16520/AT2G26180/AT5G06670/AT3G16060…
GO:0099512	supramolecular fiber	221	0.262248	1.1221	0.163569	0.657334	6305	tags=43%, list=31%, signal=30%	AT4G17220/AT5G23430/AT1G13448/AT3G23090/AT5G62580/AT2G07170/AT4G24860/AT4G30710/AT4G23496/AT3G10310/AT1G14690/AT1G18410/AT2G33990/AT1G21730/AT3G15050/AT2G21300/AT1G11160/AT5G06680/AT1G54460/AT5G47820/AT3G27350/AT1G27920/AT2G14825/AT1G14840/AT4G27060/AT4G26660/AT1G77460/AT5G52360/AT5G18700/AT3G20150/AT1G01510/AT3G44050/AT5G54670/AT3G51150/AT3G04630/AT1G70950/AT4G16520/AT2G26180/AT5G06670/AT3G16060…
GO:0034593	phosphatidylinositol bisphosphate phosphatase activity	13	0.51578	1.28748	0.163636	0.657334	4510	tags=46%, list=22%, signal=36%	AT2G32010/AT1G05470/AT1G22620/AT2G35680/AT1G65580/AT3G10550
GO:0034599	cellular response to oxidative stress	79	-0.354927	-1.19839	0.16378	0.657334	3358	tags=23%, list=17%, signal=19%	AT2G19590/AT3G07700/AT3G59410/AT1G34190/AT1G59730/AT1G76080/AT5G07460/AT5G07320/AT1G08830/AT1G07890/AT3G53220/AT5G46350/AT5G24810/AT1G45145/AT5G10720/AT5G67490/AT5G61810
GO:0070507	regulation of microtubule cytoskeleton organization	16	-0.518536	-1.27562	0.164021	0.657495	1239	tags=31%, list=6%, signal=29%	AT5G44610/AT4G20260/AT1G64110/AT5G52882
GO:0009668	plastid membrane organization	33	-0.431198	-1.25437	0.164384	0.657598	1582	tags=9%, list=8%, signal=8%	AT2G31690/AT4G31780
GO:0008610	lipid biosynthetic process	477	-0.269346	-1.1181	0.16445	0.657598	3495	tags=21%, list=17%, signal=18%	AT3G29160/AT3G14520/AT2G46720/AT1G61680/AT1G69640/AT2G45400/AT1G68320/AT1G20330/AT2G31360/AT4G21220/AT1G13560/AT2G34630/AT4G34310/AT3G16785/AT3G10280/AT3G06060/AT3G07700/AT2G39445/AT4G13280/AT4G33950/AT1G32200/AT4G34650/AT2G28630/AT1G01610/AT4G22305/AT1G25450/AT1G19630/AT1G06360/AT5G03080/AT2G23410/AT5G43760/AT3G07020/AT3G61580/AT3G54020/AT5G13710/AT1G78510/AT1G06520/AT4G15130/AT5G57190/AT4G34250…
GO:0045036	protein targeting to chloroplast	32	0.394469	1.23516	0.165072	0.658471	5147	tags=31%, list=25%, signal=23%	AT5G57180/AT4G15810/AT4G02482/AT2G47450/AT1G04945/AT5G22640/AT4G02510/AT5G14370/AT4G03320/AT2G04030
GO:0072596	establishment of protein localization to chloroplast	32	0.394469	1.23516	0.165072	0.658471	5147	tags=31%, list=25%, signal=23%	AT5G57180/AT4G15810/AT4G02482/AT2G47450/AT1G04945/AT5G22640/AT4G02510/AT5G14370/AT4G03320/AT2G04030
GO:1900056	negative regulation of leaf senescence	13	0.513998	1.28304	0.165909	0.660463	756	tags=23%, list=4%, signal=22%	AT2G45680/AT2G40750/AT3G56400
GO:0043632	modification-dependent macromolecule catabolic process	405	-0.27311	-1.12445	0.166056	0.660463	2084	tags=14%, list=10%, signal=13%	AT3G18980/AT2G22690/AT3G17280/AT5G63160/AT5G52060/AT1G26800/AT5G50430/AT1G66660/AT2G42350/AT5G43190/AT1G79110/AT3G61460/AT4G35480/AT2G25740/AT5G64920/AT4G15410/AT2G22010/AT3G13672/AT2G41980/AT5G39250/AT3G19470/AT3G18773/AT2G42030/AT2G25490/AT5G59550/AT2G39720/AT3G62690/AT4G17895/AT5G05810/AT1G25150/AT2G35000/AT5G26260/AT2G37580/AT1G15100/AT2G02870/AT5G60820/AT3G09350/AT2G35910/AT2G01150/AT2G22890…
GO:0007018	microtubule-based movement	70	0.338526	1.21839	0.166197	0.660463	7220	tags=63%, list=36%, signal=41%	AT4G24860/AT3G10310/AT1G18410/AT1G21730/AT2G21300/AT5G47820/AT4G26660/AT3G20150/AT3G44050/AT5G54670/AT3G51150/AT5G06670/AT3G16060/AT1G63640/AT3G49650/AT5G02370/AT2G22610/AT4G14330/AT4G27180/AT5G33300/AT5G65930/AT1G18550/AT2G21380/AT3G44730/AT4G14150/AT3G19050/AT4G21270/AT5G66310/AT3G45850/AT2G28620/AT3G23670/AT4G15930/AT1G59540/AT2G36200/AT1G18370/AT3G43210/AT2G37420/AT5G60930/AT1G55550/AT5G27550…
GO:1901879	regulation of protein depolymerization	24	-0.458786	-1.26034	0.166381	0.660463	2173	tags=21%, list=11%, signal=19%	AT3G25500/AT4G20260/AT1G64110/AT5G52882
GO:0010029	regulation of seed germination	73	-0.361541	-1.20856	0.167449	0.662792	2655	tags=34%, list=13%, signal=30%	AT3G48990/AT1G78260/AT2G46780/AT5G53000/AT5G11310/AT5G02500/AT5G66730/AT3G47620/AT1G07240/AT1G66350/AT5G13200/AT1G18100/AT3G06500/AT1G10560/AT2G45210/AT2G42620/AT5G35750/AT1G22330/AT5G17490/AT1G75220/AT1G20450/AT4G26150/AT4G22620/AT4G12410
GO:0031125	rRNA 3'-end processing	16	0.497601	1.30399	0.167816	0.662792	8529	tags=62%, list=42%, signal=36%	AT2G25355/AT1G59760/AT3G04770/AT3G46210/AT3G12990/AT5G27700/AT3G60500/AT1G60080/AT4G32175/AT3G53890
GO:0016054	organic acid catabolic process	113	-0.325308	-1.16971	0.167916	0.662792	4138	tags=25%, list=20%, signal=20%	AT3G16170/AT2G02390/AT3G48990/AT2G16500/AT1G76150/AT2G37040/AT1G79440/AT4G26910/AT5G55070/AT1G17290/AT1G19630/AT2G03800/AT2G22330/AT5G43430/AT4G34710/AT4G16760/AT3G53260/AT2G20340/AT5G24530/AT3G21780/AT4G10500/AT3G55840/AT5G27520/AT1G02400/AT4G10490/AT3G30775/AT5G38710
GO:0046395	carboxylic acid catabolic process	113	-0.325308	-1.16971	0.167916	0.662792	4138	tags=25%, list=20%, signal=20%	AT3G16170/AT2G02390/AT3G48990/AT2G16500/AT1G76150/AT2G37040/AT1G79440/AT4G26910/AT5G55070/AT1G17290/AT1G19630/AT2G03800/AT2G22330/AT5G43430/AT4G34710/AT4G16760/AT3G53260/AT2G20340/AT5G24530/AT3G21780/AT4G10500/AT3G55840/AT5G27520/AT1G02400/AT4G10490/AT3G30775/AT5G38710
GO:0009934	regulation of meristem structural organization	14	0.516025	1.30972	0.168182	0.662792	4746	tags=57%, list=23%, signal=44%	AT1G75820/AT1G04020/AT1G55350/AT2G26170/AT1G65470/AT5G46700/AT1G62360/AT1G76540
GO:0043900	regulation of multi-organism process	218	0.261364	1.11705	0.168498	0.662792	2972	tags=18%, list=15%, signal=15%	AT1G32640/AT4G14465/AT1G02450/AT4G14390/AT3G24900/AT5G20480/AT1G47890/AT5G26920/AT2G33020/AT2G13680/AT4G14400/AT1G79030/AT1G31650/AT3G56400/AT1G73805/AT4G13810/AT3G18690/AT4G03450/AT1G20160/AT1G20900/AT4G03500/AT1G32540/AT5G47220/AT4G04920/AT1G01760/AT2G41370/AT5G24590/AT3G26830/AT2G37630/AT3G52430/AT3G51480/AT3G56410/AT3G01310/AT4G13880/AT5G18650/AT3G28890/AT5G39420/AT4G05040/AT1G03830
GO:0009827	plant-type cell wall modification	18	-0.501327	-1.27084	0.168739	0.662792	1308	tags=22%, list=6%, signal=21%	AT4G30270/AT4G01630/AT1G10550
GO:0009699	phenylpropanoid biosynthetic process	100	-0.336593	-1.19743	0.168929	0.662792	3980	tags=30%, list=20%, signal=24%	AT1G64670/AT1G80820/AT2G37040/AT2G36880/AT2G39410/AT4G34230/AT1G61820/AT3G62160/AT1G76470/AT1G09500/AT5G66390/AT5G41040/AT3G53260/AT3G11430/AT5G48100/AT1G64160/AT1G77420/AT4G37990/AT5G48930/AT1G67980/AT3G44550/AT5G05340/AT3G56700/AT5G22500/AT3G21230/AT4G11180/AT3G17390/AT2G40230/AT4G01070
GO:0009808	lignin metabolic process	73	-0.361069	-1.20698	0.169014	0.662792	3596	tags=27%, list=18%, signal=23%	AT2G36880/AT2G39410/AT4G34230/AT1G61820/AT3G62160/AT1G09500/AT5G66390/AT2G30490/AT5G48100/AT1G77420/AT4G37990/AT5G48930/AT3G02130/AT1G67980/AT5G05340/AT5G01040/AT3G17390/AT5G01050/AT4G01070
GO:0032886	regulation of microtubule-based process	19	-0.491435	-1.26668	0.169284	0.662792	4090	tags=32%, list=20%, signal=25%	AT5G44610/AT1G01950/AT4G20260/AT1G64110/AT5G52882
GO:0071365	cellular response to auxin stimulus	16	-0.514468	-1.26562	0.169312	0.662792	3961	tags=44%, list=19%, signal=35%	AT1G71930/AT3G53480/AT5G48070/AT4G30290/AT3G62680/AT2G46370
GO:0016051	carbohydrate biosynthetic process	301	-0.282007	-1.13085	0.169643	0.662792	3480	tags=20%, list=17%, signal=17%	AT3G29810/AT3G54050/AT3G45400/AT5G62220/AT3G06550/AT5G09870/AT5G65140/AT4G21220/AT5G05170/AT5G44480/AT4G30440/AT3G62720/AT4G17090/AT4G01750/AT3G25140/AT5G38430/AT2G46750/AT2G25540/AT1G02720/AT3G55440/AT5G47780/AT5G41040/AT1G24793/AT1G78050/AT1G24170/AT5G64740/AT4G39770/AT5G50750/AT1G74380/AT2G39770/AT4G03550/AT2G34850/AT3G23820/AT3G03050/AT3G08900/AT5G06700/AT1G78240/AT3G07160/AT2G18700/AT5G65690…
GO:0051223	regulation of protein transport	24	-0.452079	-1.24191	0.169811	0.662792	6398	tags=54%, list=31%, signal=37%	AT5G17020/AT5G61010/AT2G27350/AT1G63900/AT4G10130/AT5G50440/AT4G18710/AT4G16144/AT5G19820/AT4G30600/AT5G41790/AT4G19720
GO:0090087	regulation of peptide transport	24	-0.452079	-1.24191	0.169811	0.662792	6398	tags=54%, list=31%, signal=37%	AT5G17020/AT5G61010/AT2G27350/AT1G63900/AT4G10130/AT5G50440/AT4G18710/AT4G16144/AT5G19820/AT4G30600/AT5G41790/AT4G19720
GO:0019901	protein kinase binding	64	0.333936	1.19781	0.170157	0.663348	2075	tags=19%, list=10%, signal=17%	AT3G60550/AT3G25250/AT2G01830/AT4G27160/AT5G03640/AT2G45080/AT1G79030/AT4G26080/AT2G36350/AT2G20470/AT3G21870/AT1G27320
GO:0016857	racemase and epimerase activity, acting on carbohydrates and derivatives	29	-0.442981	-1.25117	0.170435	0.663638	4528	tags=31%, list=22%, signal=24%	AT5G28840/AT4G25900/AT5G44480/AT4G30440/AT4G10960/AT2G34850/AT3G23820/AT4G23730
GO:0010359	regulation of anion channel activity	12	-0.564208	-1.30025	0.171123	0.664731	2957	tags=50%, list=15%, signal=43%	AT2G17290/AT4G23650/AT1G09995/AT3G11410/AT5G46330
GO:0031110	regulation of microtubule polymerization or depolymerization	12	-0.56216	-1.29553	0.171123	0.664731	1239	tags=42%, list=6%, signal=39%	AT5G44610/AT4G20260/AT1G64110/AT5G52882
GO:0042761	very long-chain fatty acid biosynthetic process	21	-0.484508	-1.27376	0.171629	0.665903	3808	tags=29%, list=19%, signal=23%	AT2G31360/AT1G13580/AT5G16010/AT4G36830/AT1G26200
GO:0001678	cellular glucose homeostasis	10	-0.585071	-1.27309	0.171963	0.666406	2716	tags=30%, list=13%, signal=26%	AT3G20040/AT1G50460
GO:0018024	histone-lysine N-methyltransferase activity	32	0.392738	1.22974	0.172249	0.666571	4958	tags=41%, list=24%, signal=31%	AT5G53430/AT2G31650/AT2G44150/AT5G04940/AT2G35160/AT3G61740/AT4G15180/AT4G02020/AT1G77300/AT2G23740/AT3G20810/AT1G04050/AT5G43990
GO:0031058	positive regulation of histone modification	16	0.492994	1.29192	0.172414	0.666571	7570	tags=62%, list=37%, signal=39%	AT4G04180/AT1G54440/AT1G04020/AT1G14350/AT1G77300/AT4G30200/AT2G16390/AT2G42940/AT4G21070/AT5G35910
GO:0044450	microtubule organizing center part	14	0.509493	1.29314	0.172727	0.666892	6709	tags=57%, list=33%, signal=38%	AT5G23430/AT1G11160/AT5G06680/AT1G61210/AT5G07590/AT4G09550/AT1G73790/AT5G08390
GO:0009395	phospholipid catabolic process	12	-0.560709	-1.29219	0.172906	0.666892	1608	tags=33%, list=8%, signal=31%	AT3G03520/AT3G02040/AT5G41080
GO:0008361	regulation of cell size	21	0.453019	1.27933	0.174014	0.670375	832	tags=10%, list=4%, signal=9%	AT2G45680/AT2G36910
GO:0045935	positive regulation of nucleobase-containing compound metabolic process	345	0.23891	1.07775	0.175115	0.672589	2667	tags=15%, list=13%, signal=13%	AT1G32640/AT4G25490/AT5G61600/AT4G23810/AT5G51870/AT1G73870/AT5G22290/AT1G32770/AT1G46768/AT1G79180/AT3G61910/AT5G50080/AT4G18880/AT5G11470/AT3G24140/AT1G49010/AT5G44160/AT4G17880/AT5G13250/AT4G28500/AT1G20870/AT4G39410/AT2G46770/AT5G26630/AT2G35430/AT1G28470/AT5G48670/AT2G27230/AT4G01540/AT1G64490/AT3G10500/AT2G03710/AT5G47220/AT1G01760/AT2G47460/AT1G04020/AT5G49430/AT2G38340/AT2G22540/AT5G61330…
GO:0048437	floral organ development	44	0.36717	1.22392	0.175258	0.672589	3141	tags=30%, list=15%, signal=25%	AT1G32240/AT2G31160/AT5G03680/AT3G13730/AT2G36910/AT4G36380/AT2G03710/AT1G69180/AT4G20270/AT4G36930/AT1G11130/AT4G15180/AT3G28860
GO:0060627	regulation of vesicle-mediated transport	60	-0.378245	-1.21787	0.17609	0.672589	2016	tags=17%, list=10%, signal=15%	AT3G07890/AT5G52580/AT3G02460/AT3G62690/AT4G28550/AT4G27100/AT4G17470/AT3G60260/AT5G03520
GO:0055029	nuclear DNA-directed RNA polymerase complex	49	0.35589	1.21938	0.176166	0.672589	5932	tags=35%, list=29%, signal=25%	AT2G15400/AT5G10060/AT1G63020/AT2G41340/AT1G67630/AT3G57080/AT1G54250/AT1G06790/AT3G57660/AT3G25940/AT5G67100/AT1G03760/AT4G21670/AT3G23780/AT5G41880/AT2G16390/AT1G01210
GO:0032990	cell part morphogenesis	12	-0.555799	-1.28087	0.176471	0.672589	2523	tags=50%, list=12%, signal=44%	AT4G28000/AT4G30600/AT1G64110/AT5G09890/AT5G52882
GO:0048812	neuron projection morphogenesis	12	-0.555799	-1.28087	0.176471	0.672589	2523	tags=50%, list=12%, signal=44%	AT4G28000/AT4G30600/AT1G64110/AT5G09890/AT5G52882
GO:0048858	cell projection morphogenesis	12	-0.555799	-1.28087	0.176471	0.672589	2523	tags=50%, list=12%, signal=44%	AT4G28000/AT4G30600/AT1G64110/AT5G09890/AT5G52882
GO:0120039	plasma membrane bounded cell projection morphogenesis	12	-0.555799	-1.28087	0.176471	0.672589	2523	tags=50%, list=12%, signal=44%	AT4G28000/AT4G30600/AT1G64110/AT5G09890/AT5G52882
GO:0033218	amide binding	73	-0.358434	-1.19818	0.176839	0.672589	5735	tags=37%, list=28%, signal=27%	AT2G44620/AT4G24230/AT3G06720/AT1G75760/AT4G25050/AT5G42150/AT1G13900/AT1G17170/AT3G25160/AT2G26000/AT1G02920/AT1G09270/AT5G27630/AT4G35450/AT2G21190/AT1G02930/AT5G19820/AT5G27380/AT4G02520/AT2G47730/AT2G30870/AT5G62600/AT1G29330/AT1G72180/AT5G27200/AT2G29450
GO:0009082	branched-chain amino acid biosynthetic process	21	-0.481127	-1.26487	0.176883	0.672589	6899	tags=62%, list=34%, signal=41%	AT1G80560/AT3G10050/AT2G43090/AT5G23020/AT1G10070/AT1G18500/AT1G14810/AT3G49680/AT4G13430/AT5G14200/AT3G20390/AT2G31810
GO:0016641	oxidoreductase activity, acting on the CH-NH2 group of donors, oxygen as acceptor	25	-0.453109	-1.25639	0.177474	0.672589	3905	tags=32%, list=19%, signal=26%	AT2G25450/AT2G19590/AT1G05010/AT4G29740/AT1G31710/AT3G61400/AT2G30830
GO:0030545	receptor regulator activity	31	-0.43151	-1.24049	0.177474	0.672589	4369	tags=45%, list=22%, signal=36%	AT2G29995/AT1G28270/AT2G33775/AT3G23805/AT4G14010/AT1G02900/AT4G13950/AT3G16570/AT3G25170/AT3G44735/AT3G05490/AT4G15800/AT2G22860
GO:0030546	signaling receptor activator activity	31	-0.43151	-1.24049	0.177474	0.672589	4369	tags=45%, list=22%, signal=36%	AT2G29995/AT1G28270/AT2G33775/AT3G23805/AT4G14010/AT1G02900/AT4G13950/AT3G16570/AT3G25170/AT3G44735/AT3G05490/AT4G15800/AT2G22860
GO:0048018	receptor ligand activity	31	-0.43151	-1.24049	0.177474	0.672589	4369	tags=45%, list=22%, signal=36%	AT2G29995/AT1G28270/AT2G33775/AT3G23805/AT4G14010/AT1G02900/AT4G13950/AT3G16570/AT3G25170/AT3G44735/AT3G05490/AT4G15800/AT2G22860
GO:0016197	endosomal transport	52	-0.396539	-1.24744	0.17817	0.674442	6019	tags=46%, list=30%, signal=33%	AT1G50500/AT2G20320/AT4G39890/AT3G47810/AT4G39990/AT1G73030/AT5G39510/AT2G38410/AT5G50440/AT5G52210/AT3G14270/AT2G30330/AT1G32410/AT3G11530/AT3G17440/AT1G17730/AT1G34260/AT5G67290/AT5G64990/AT5G10260/AT4G19003/AT4G21560/AT3G02460
GO:0099513	polymeric cytoskeletal fiber	220	0.259889	1.1139	0.178832	0.675493	6305	tags=43%, list=31%, signal=30%	AT4G17220/AT5G23430/AT1G13448/AT3G23090/AT5G62580/AT2G07170/AT4G24860/AT4G30710/AT4G23496/AT3G10310/AT1G14690/AT1G18410/AT2G33990/AT1G21730/AT3G15050/AT2G21300/AT1G11160/AT5G06680/AT1G54460/AT5G47820/AT3G27350/AT1G27920/AT2G14825/AT1G14840/AT4G27060/AT4G26660/AT1G77460/AT5G52360/AT5G18700/AT3G20150/AT1G01510/AT3G44050/AT5G54670/AT3G51150/AT3G04630/AT1G70950/AT4G16520/AT2G26180/AT5G06670/AT3G16060…
GO:0098791	Golgi subcompartment	226	-0.291025	-1.13699	0.178862	0.675493	3957	tags=26%, list=19%, signal=21%	AT3G61130/AT3G49720/AT2G22900/AT1G18630/AT2G20810/AT4G37690/AT5G39510/AT3G62830/AT2G26890/AT5G52210/AT3G66654/AT5G66120/AT1G28490/AT5G45550/AT2G40280/AT3G13900/AT1G08720/AT1G67330/AT2G38360/AT2G40380/AT5G05170/AT1G61250/AT4G30440/AT3G62720/AT2G03250/AT5G54830/AT1G20270/AT1G14040/AT4G18030/AT3G25140/AT3G54020/AT3G28180/AT1G76270/AT4G02195/AT4G30260/AT1G53840/AT1G26730/AT1G74380/AT2G34300/AT4G21560…
GO:0006897	endocytosis	86	-0.343008	-1.18964	0.182099	0.686923	2714	tags=26%, list=13%, signal=22%	AT1G03930/AT3G56960/AT1G04440/AT2G26890/AT5G25250/AT1G21660/AT4G16144/AT5G22780/AT3G11130/AT4G17480/AT1G25240/AT5G57015/AT5G22770/AT5G42090/AT2G25430/AT5G47330/AT4G17470/AT1G05020/AT1G75310/AT5G46330/AT5G10410
GO:0000041	transition metal ion transport	51	0.341498	1.18614	0.182519	0.687714	2987	tags=22%, list=15%, signal=18%	AT1G76800/AT1G05300/AT2G30080/AT5G59520/AT4G16370/AT1G55910/AT2G19110/AT1G21140/AT1G60960/AT3G11050/AT5G44790
GO:0071027	nuclear RNA surveillance	13	0.504802	1.26008	0.184091	0.691281	8165	tags=62%, list=40%, signal=37%	AT2G25355/AT1G75660/AT3G46210/AT5G42540/AT3G12990/AT3G60500/AT1G60080/AT4G32175
GO:0008171	O-methyltransferase activity	43	-0.407752	-1.24802	0.184641	0.691281	4950	tags=47%, list=24%, signal=35%	AT3G11480/AT2G19870/AT1G21120/AT1G02100/AT5G50240/AT2G30920/AT3G62000/AT5G38020/AT4G17610/AT1G21110/AT5G53810/AT1G67980/AT5G04370/AT4G35160/AT1G77520/AT1G77530/AT1G63140/AT3G44860/AT3G44870
GO:0071458	integral component of cytoplasmic side of endoplasmic reticulum membrane	10	-0.581121	-1.2645	0.185047	0.691281	2296	tags=60%, list=11%, signal=53%	AT4G11220/AT1G01650/AT1G05820/AT5G41600/AT4G23630
GO:0000418	RNA polymerase IV complex	15	0.494284	1.28045	0.18552	0.691281	2232	tags=20%, list=11%, signal=18%	AT2G15400/AT1G63020/AT2G41340
GO:0051254	positive regulation of RNA metabolic process	329	0.239774	1.07568	0.186275	0.691281	2667	tags=15%, list=13%, signal=13%	AT1G32640/AT4G25490/AT5G61600/AT4G23810/AT5G51870/AT1G73870/AT5G22290/AT1G32770/AT1G46768/AT1G79180/AT3G61910/AT5G50080/AT4G18880/AT5G11470/AT3G24140/AT1G49010/AT5G44160/AT4G17880/AT5G13250/AT4G28500/AT4G39410/AT2G46770/AT5G26630/AT2G35430/AT1G28470/AT5G48670/AT2G27230/AT4G01540/AT1G64490/AT3G10500/AT2G03710/AT5G47220/AT1G01760/AT2G47460/AT1G04020/AT5G49430/AT2G38340/AT2G22540/AT5G61330/AT2G46680…
GO:0000400	four-way junction DNA binding	10	0.532572	1.26228	0.186296	0.691281	5926	tags=70%, list=29%, signal=50%	AT2G26840/AT3G18524/AT3G10140/AT3G22880/AT1G07745/AT5G64520/AT2G19490
GO:0006490	oligosaccharide-lipid intermediate biosynthetic process	10	0.535711	1.26972	0.186296	0.691281	8288	tags=80%, list=41%, signal=47%	AT5G38460/AT5G59470/AT4G16710/AT4G18230/AT4G07390/AT2G40190/AT5G02410/AT1G16900
GO:0043634	polyadenylation-dependent ncRNA catabolic process	10	0.533442	1.26434	0.186296	0.691281	8165	tags=70%, list=40%, signal=42%	AT2G25355/AT1G75660/AT5G42540/AT3G12990/AT3G60500/AT1G60080/AT4G32175
GO:0071029	nuclear ncRNA surveillance	10	0.533442	1.26434	0.186296	0.691281	8165	tags=70%, list=40%, signal=42%	AT2G25355/AT1G75660/AT5G42540/AT3G12990/AT3G60500/AT1G60080/AT4G32175
GO:0071035	nuclear polyadenylation-dependent rRNA catabolic process	10	0.533442	1.26434	0.186296	0.691281	8165	tags=70%, list=40%, signal=42%	AT2G25355/AT1G75660/AT5G42540/AT3G12990/AT3G60500/AT1G60080/AT4G32175
GO:0071046	nuclear polyadenylation-dependent ncRNA catabolic process	10	0.533442	1.26434	0.186296	0.691281	8165	tags=70%, list=40%, signal=42%	AT2G25355/AT1G75660/AT5G42540/AT3G12990/AT3G60500/AT1G60080/AT4G32175
GO:0071446	cellular response to salicylic acid stimulus	14	0.5047	1.28097	0.186364	0.691281	1387	tags=29%, list=7%, signal=27%	AT4G14390/AT4G14400/AT4G03450/AT4G03500
GO:0005685	U1 snRNP	19	0.465582	1.26875	0.18648	0.691281	9359	tags=63%, list=46%, signal=34%	AT4G20440/AT4G30220/AT1G44910/AT4G03120/AT4G30330/AT5G44500/AT3G62840/AT3G19670/AT2G14285/AT1G20580/AT2G47640/AT2G23930
GO:0099080	supramolecular complex	224	0.258685	1.11532	0.186567	0.691281	6305	tags=42%, list=31%, signal=30%	AT4G17220/AT5G23430/AT1G13448/AT3G23090/AT5G62580/AT2G07170/AT4G24860/AT4G30710/AT4G23496/AT3G10310/AT1G14690/AT1G18410/AT2G33990/AT1G21730/AT3G15050/AT2G21300/AT1G11160/AT5G06680/AT1G54460/AT5G47820/AT3G27350/AT1G27920/AT2G14825/AT1G14840/AT4G27060/AT4G26660/AT1G77460/AT5G52360/AT5G18700/AT3G20150/AT1G01510/AT3G44050/AT5G54670/AT3G51150/AT3G04630/AT1G70950/AT4G16520/AT2G26180/AT5G06670/AT3G16060…
GO:0016706	2-oxoglutarate-dependent dioxygenase activity	33	-0.42211	-1.22793	0.186644	0.691281	5100	tags=36%, list=25%, signal=27%	AT1G31600/AT5G63600/AT1G11780/AT2G22270/AT4G33910/AT1G20270/AT5G24530/AT5G07200/AT3G47190/AT5G58660/AT1G02400
GO:0007623	circadian rhythm	101	-0.330632	-1.17376	0.187215	0.692609	2838	tags=16%, list=14%, signal=14%	AT3G46640/AT1G09500/AT3G58850/AT3G24050/AT1G10470/AT2G42540/AT3G06500/AT4G26700/AT3G12700/AT5G24810/AT4G26150/AT2G17840/AT4G03390/AT5G12050/AT5G52310
GO:0008574	ATP-dependent microtubule motor activity, plus-end-directed	12	0.508034	1.2483	0.188209	0.695498	6305	tags=83%, list=31%, signal=58%	AT5G47820/AT4G26660/AT3G20150/AT4G14330/AT5G33300/AT3G45850/AT2G28620/AT2G36200/AT2G37420/AT5G60930
GO:0031328	positive regulation of cellular biosynthetic process	364	0.236589	1.07718	0.188776	0.696804	2769	tags=16%, list=14%, signal=14%	AT1G32640/AT4G25490/AT5G61600/AT4G23810/AT4G27260/AT5G51870/AT1G73870/AT5G22290/AT1G32770/AT1G68130/AT1G46768/AT1G79180/AT3G61910/AT5G50080/AT4G18880/AT5G11470/AT3G24140/AT1G49010/AT5G44160/AT4G17880/AT5G13250/AT4G28500/AT4G39410/AT2G46770/AT5G26630/AT1G28470/AT5G48670/AT2G27230/AT4G01540/AT1G64490/AT3G10500/AT2G03710/AT5G47220/AT2G47460/AT1G04020/AT5G49430/AT2G38340/AT2G22540/AT5G61330/AT1G55350…
GO:0044273	sulfur compound catabolic process	35	-0.422804	-1.23717	0.189097	0.697202	4843	tags=37%, list=24%, signal=28%	AT5G26220/AT1G54040/AT2G43910/AT1G44790/AT3G09260/AT3G60130/AT3G16410/AT2G44450/AT3G16400/AT1G51470/AT1G47600/AT3G44320
GO:0045930	negative regulation of mitotic cell cycle	21	0.445677	1.2586	0.190255	0.70068	7200	tags=57%, list=35%, signal=37%	AT1G29770/AT1G13448/AT1G69400/AT1G49910/AT4G30870/AT4G37650/AT3G23890/AT1G79280/AT1G77720/AT3G02680/AT5G05510/AT2G33560
GO:0031463	Cul3-RING ubiquitin ligase complex	12	-0.546756	-1.26003	0.190731	0.701065	3489	tags=33%, list=17%, signal=28%	AT5G42350/AT1G31350/AT1G02670
GO:0044419	interspecies interaction between organisms	155	0.271313	1.12406	0.190789	0.701065	3746	tags=24%, list=18%, signal=20%	AT5G42242/AT5G19175/AT3G43505/AT3G48231/AT1G13755/AT5G44973/AT2G02147/AT1G05460/AT1G13607/AT1G60800/AT1G13609/AT1G54445/AT2G19710/AT3G16895/AT3G05727/AT2G02140/AT3G27835/AT2G21465/AT5G56369/AT3G25560/AT5G48160/AT5G24590/AT4G39917/AT3G25670/AT5G55132/AT2G01660/AT3G47040/AT4G11485/AT2G02120/AT5G04045/AT5G50820/AT5G43980/AT5G16000/AT1G68780/AT5G37660/AT5G13180/AT1G44900
GO:0033047	regulation of mitotic sister chromatid segregation	19	0.457464	1.24663	0.191142	0.701571	7278	tags=63%, list=36%, signal=41%	AT5G64910/AT1G13448/AT1G69400/AT1G49910/AT3G48150/AT3G05870/AT4G21530/AT1G79280/AT5G10010/AT5G05510/AT2G33560/AT1G50490
GO:0016101	diterpenoid metabolic process	27	-0.440009	-1.22491	0.192374	0.70172	1828	tags=26%, list=9%, signal=24%	AT3G47190/AT5G58660/AT5G41120/AT1G02400/AT5G61780/AT1G61120
GO:0002084	protein depalmitoylation	10	-0.576865	-1.25524	0.192523	0.70172	2903	tags=40%, list=14%, signal=34%	AT4G17480/AT5G47330/AT4G17470
GO:0042157	lipoprotein metabolic process	10	-0.576865	-1.25524	0.192523	0.70172	2903	tags=40%, list=14%, signal=34%	AT4G17480/AT5G47330/AT4G17470
GO:0042159	lipoprotein catabolic process	10	-0.576865	-1.25524	0.192523	0.70172	2903	tags=40%, list=14%, signal=34%	AT4G17480/AT5G47330/AT4G17470
GO:0098734	macromolecule depalmitoylation	10	-0.576865	-1.25524	0.192523	0.70172	2903	tags=40%, list=14%, signal=34%	AT4G17480/AT5G47330/AT4G17470
GO:0018196	peptidyl-asparagine modification	12	0.506586	1.24474	0.192744	0.70172	8692	tags=67%, list=43%, signal=38%	AT3G48820/AT2G39630/AT1G76400/AT1G08280/AT1G34130/AT5G19690/AT1G71220/AT2G01720
GO:0018279	protein N-linked glycosylation via asparagine	12	0.506586	1.24474	0.192744	0.70172	8692	tags=67%, list=43%, signal=38%	AT3G48820/AT2G39630/AT1G76400/AT1G08280/AT1G34130/AT5G19690/AT1G71220/AT2G01720
GO:0010389	regulation of G2/M transition of mitotic cell cycle	16	0.481946	1.26297	0.193103	0.70172	5471	tags=38%, list=27%, signal=27%	AT1G15570/AT2G44950/AT4G30870/AT3G54180/AT1G76540/AT2G38620
GO:0010082	regulation of root meristem growth	20	0.453724	1.26986	0.193182	0.70172	4625	tags=40%, list=23%, signal=31%	AT3G54720/AT5G46260/AT1G67710/AT5G46270/AT3G15150/AT1G44900/AT4G11880/AT4G31920
GO:0004185	serine-type carboxypeptidase activity	23	-0.454097	-1.22687	0.193437	0.70172	4546	tags=30%, list=22%, signal=24%	AT5G08260/AT5G22980/AT5G23210/AT4G30610/AT1G15000/AT4G15100
GO:0009833	plant-type primary cell wall biogenesis	17	0.476825	1.2582	0.193548	0.70172	3038	tags=53%, list=15%, signal=45%	AT2G21770/AT5G44030/AT2G32530/AT4G18780/AT1G55850/AT4G23990/AT4G24000/AT5G17420/AT2G32540
GO:0002683	negative regulation of immune system process	28	0.407719	1.22587	0.193925	0.702306	4514	tags=29%, list=22%, signal=22%	AT4G14465/AT1G79030/AT1G20900/AT2G33550/AT1G03160/AT4G18470/AT5G62570/AT5G28390
GO:0045488	pectin metabolic process	127	-0.31442	-1.15468	0.19469	0.702701	2773	tags=24%, list=14%, signal=21%	AT3G27400/AT4G01750/AT1G11580/AT3G25140/AT2G26440/AT3G29360/AT5G64640/AT1G02720/AT5G47780/AT5G41040/AT1G53840/AT1G24170/AT5G04310/AT5G20860/AT4G15980/AT4G02320/AT1G53830/AT4G02330/AT5G06700/AT1G78240/AT1G23200/AT3G49220/AT3G01040/AT3G50760/AT3G58790/AT4G02130/AT2G33570/AT2G47550/AT2G40230
GO:0000469	cleavage involved in rRNA processing	25	0.418937	1.21585	0.194712	0.702701	8529	tags=64%, list=42%, signal=37%	AT3G09160/AT1G06720/AT5G51730/AT2G25355/AT3G04770/AT3G12990/AT5G22100/AT5G27700/AT5G08180/AT1G12650/AT3G60500/AT1G60080/AT1G48920/AT4G32175/AT2G37990/AT3G53890
GO:0010089	xylem development	30	0.40148	1.23061	0.194774	0.702701	3654	tags=47%, list=18%, signal=38%	AT5G61480/AT5G64530/AT4G32880/AT3G21710/AT4G08150/AT4G13195/AT2G28250/AT5G02030/AT1G64625/AT5G60690/AT5G50820/AT1G62990/AT1G09540/AT5G13180
GO:0001522	pseudouridine synthesis	21	0.440588	1.24423	0.194896	0.702701	6597	tags=62%, list=32%, signal=42%	AT1G56345/AT4G21770/AT3G57150/AT3G19440/AT2G20490/AT5G35400/AT1G09800/AT3G06950/AT1G20410/AT1G20370/AT1G76050/AT5G51140/AT5G08180
GO:0000347	THO complex	14	0.497515	1.26274	0.195455	0.703526	5945	tags=57%, list=29%, signal=40%	AT2G07690/AT1G44900/AT5G16790/AT4G02060/AT1G24706/AT5G44635/AT2G16440/AT5G46280
GO:0006281	DNA repair	271	0.249514	1.08957	0.195556	0.703526	7178	tags=42%, list=35%, signal=27%	AT1G14460/AT4G24790/AT4G31400/AT2G24250/AT4G02070/AT4G18820/AT3G24320/AT2G21800/AT1G04020/AT1G20720/AT4G02390/AT5G01780/AT4G31150/AT5G64630/AT3G09660/AT3G20820/AT5G15920/AT5G27680/AT3G10010/AT3G18524/AT3G15150/AT3G27060/AT1G65470/AT4G10180/AT5G54260/AT4G30870/AT5G45720/AT3G61420/AT2G31320/AT1G03190/AT2G02480/AT4G36050/AT5G40820/AT4G35740/AT1G79890/AT5G09740/AT3G25100/AT3G59550/AT1G10520/AT1G18340…
GO:0016289	CoA hydrolase activity	12	-0.542287	-1.24973	0.196078	0.70407	2467	tags=25%, list=12%, signal=22%	AT2G30720/AT4G17470
GO:0005244	voltage-gated ion channel activity	48	-0.395172	-1.2344	0.196429	0.70407	2135	tags=19%, list=11%, signal=17%	AT1G19570/AT5G40890/AT1G01340/AT4G32650/AT4G27970/AT5G15410/AT3G27170/AT5G24030
GO:0022832	voltage-gated channel activity	48	-0.395172	-1.2344	0.196429	0.70407	2135	tags=19%, list=11%, signal=17%	AT1G19570/AT5G40890/AT1G01340/AT4G32650/AT4G27970/AT5G15410/AT3G27170/AT5G24030
GO:0046677	response to antibiotic	251	-0.285648	-1.12617	0.19657	0.70407	2799	tags=22%, list=14%, signal=19%	AT5G67300/AT3G59410/AT5G05410/AT1G34190/AT4G23130/AT1G16420/AT4G38620/AT1G21910/AT2G36890/AT1G55870/AT1G08650/AT5G65790/AT5G63160/AT3G50480/AT5G52660/AT3G10985/AT1G08830/AT2G29420/AT2G29500/AT2G32690/AT5G24530/AT1G19570/AT2G26150/AT1G77420/AT2G39770/AT2G32800/AT4G10500/AT5G46350/AT4G39030/AT4G33720/AT4G12400/AT4G34990/AT3G51450/AT5G59780/AT1G49950/AT4G31800/AT5G24810/AT1G54050/AT2G13960/AT5G40990…
GO:0052689	carboxylic ester hydrolase activity	174	-0.297886	-1.13799	0.196906	0.704499	2691	tags=18%, list=13%, signal=16%	AT2G03800/AT2G26440/AT5G64640/AT5G23530/AT4G25770/AT5G06570/AT5G16080/AT1G13700/AT1G53840/AT2G30550/AT5G20860/AT4G15980/AT1G77420/AT1G31480/AT1G47480/AT4G02320/AT1G53830/AT1G19670/AT4G02330/AT2G30720/AT1G23200/AT5G45280/AT2G31690/AT1G09550/AT3G49220/AT2G23580/AT4G37070/AT2G47550/AT1G05800/AT2G44810
GO:0001216	DNA-binding transcription activator activity	58	0.330615	1.17042	0.198939	0.708959	3736	tags=33%, list=18%, signal=27%	AT2G20100/AT1G31050/AT3G50870/AT2G18380/AT1G51140/AT5G25830/AT4G29100/AT5G66320/AT3G60530/AT5G56860/AT3G19500/AT1G27660/AT5G47140/AT4G30980/AT5G64980/AT3G21175/AT3G51080/AT1G61660/AT1G20910
GO:0001228	DNA-binding transcription activator activity, RNA polymerase II-specific	58	0.330615	1.17042	0.198939	0.708959	3736	tags=33%, list=18%, signal=27%	AT2G20100/AT1G31050/AT3G50870/AT2G18380/AT1G51140/AT5G25830/AT4G29100/AT5G66320/AT3G60530/AT5G56860/AT3G19500/AT1G27660/AT5G47140/AT4G30980/AT5G64980/AT3G21175/AT3G51080/AT1G61660/AT1G20910
GO:0010026	trichome differentiation	19	-0.477599	-1.23102	0.198953	0.708959	2532	tags=37%, list=12%, signal=32%	AT4G09820/AT5G52600/AT2G22475/AT4G26690/AT2G41940/AT1G10480
GO:0009736	cytokinin-activated signaling pathway	51	-0.393633	-1.22979	0.199021	0.708959	1898	tags=24%, list=9%, signal=21%	AT4G16110/AT1G10470/AT4G27950/AT5G35750/AT5G10720/AT1G78100/AT3G21510/AT5G53290/AT2G41940/AT1G10480/AT5G62920
GO:0006026	aminoglycan catabolic process	17	-0.486063	-1.21776	0.200704	0.709576	2573	tags=53%, list=13%, signal=46%	AT4G01700/AT1G02360/AT4G19720/AT2G43570/AT4G19820/AT2G43610/AT2G43620/AT4G19810
GO:0006030	chitin metabolic process	17	-0.486063	-1.21776	0.200704	0.709576	2573	tags=53%, list=13%, signal=46%	AT4G01700/AT1G02360/AT4G19720/AT2G43570/AT4G19820/AT2G43610/AT2G43620/AT4G19810
GO:0006032	chitin catabolic process	17	-0.486063	-1.21776	0.200704	0.709576	2573	tags=53%, list=13%, signal=46%	AT4G01700/AT1G02360/AT4G19720/AT2G43570/AT4G19820/AT2G43610/AT2G43620/AT4G19810
GO:0046348	amino sugar catabolic process	17	-0.486063	-1.21776	0.200704	0.709576	2573	tags=53%, list=13%, signal=46%	AT4G01700/AT1G02360/AT4G19720/AT2G43570/AT4G19820/AT2G43610/AT2G43620/AT4G19810
GO:1901071	glucosamine-containing compound metabolic process	17	-0.486063	-1.21776	0.200704	0.709576	2573	tags=53%, list=13%, signal=46%	AT4G01700/AT1G02360/AT4G19720/AT2G43570/AT4G19820/AT2G43610/AT2G43620/AT4G19810
GO:1901072	glucosamine-containing compound catabolic process	17	-0.486063	-1.21776	0.200704	0.709576	2573	tags=53%, list=13%, signal=46%	AT4G01700/AT1G02360/AT4G19720/AT2G43570/AT4G19820/AT2G43610/AT2G43620/AT4G19810
GO:0008270	zinc ion binding	466	-0.264025	-1.09561	0.200717	0.709576	3429	tags=16%, list=17%, signal=14%	AT4G26910/AT5G06540/AT4G16265/AT5G55070/AT4G34230/AT5G40650/AT5G08565/AT4G34430/AT3G02380/AT3G63370/AT4G12040/AT1G16480/AT5G37930/AT4G18750/AT5G25560/AT5G48250/AT5G13450/AT3G12630/AT1G58180/AT1G08260/AT3G49142/AT4G14820/AT4G00570/AT2G22740/ATCG00480/AT4G16141/AT5G63160/AT1G08070/AT3G24050/AT3G62890/AT2G36320/AT1G18910/AT2G43430/AT1G25440/AT1G08830/AT3G52300/AT1G66660/AT5G26749/AT3G03580/AT5G15340…
GO:0032465	regulation of cytokinesis	12	0.498412	1.22466	0.201814	0.712683	5088	tags=50%, list=25%, signal=37%	AT4G24860/AT3G21700/AT4G32730/AT5G16940/AT5G05970/AT5G54840
GO:0006817	phosphate ion transport	19	-0.473186	-1.21965	0.202443	0.713311	2825	tags=32%, list=14%, signal=27%	AT1G14040/AT1G26730/AT2G03240/AT1G35350/AT5G09470
GO:0032508	DNA duplex unwinding	19	0.452283	1.23251	0.202797	0.713311	5964	tags=58%, list=29%, signal=41%	AT4G36020/AT2G24250/AT2G07690/AT1G44900/AT4G02060/AT5G44635/AT2G17036/AT2G16440/AT1G27880/AT5G46280/AT3G12530
GO:0005545	1-phosphatidylinositol binding	13	-0.523727	-1.24281	0.202847	0.713311	3445	tags=31%, list=17%, signal=26%	AT1G25240/AT2G25430/AT1G05020
GO:0019722	calcium-mediated signaling	40	-0.404239	-1.21311	0.203046	0.713311	4279	tags=40%, list=21%, signal=32%	AT2G33775/AT3G04110/AT2G32400/AT3G23805/AT4G14010/AT4G17615/AT1G02900/AT4G13950/AT3G16570/AT5G11210/AT3G25170/AT2G29120/AT3G05490/AT4G14640/AT4G15800
GO:0044247	cellular polysaccharide catabolic process	51	0.336171	1.16763	0.203085	0.713311	2505	tags=22%, list=12%, signal=19%	AT5G17523/AT1G64390/AT1G71380/AT5G63250/AT5G63230/AT4G11050/AT1G70710/AT4G23560/AT2G20680/AT4G39010/AT5G66460
GO:0009620	response to fungus	382	-0.271043	-1.109	0.203704	0.714455	4199	tags=31%, list=21%, signal=25%	AT2G43535/AT1G17420/AT2G02100/AT2G32700/AT5G42740/AT1G49050/AT1G51940/AT4G15735/AT3G48990/AT3G16530/AT1G64670/AT1G71930/AT1G51360/AT1G53320/AT2G01650/AT4G16940/AT1G02920/AT3G62770/AT1G08720/AT3G59660/AT4G23100/AT1G10920/AT3G12500/AT2G23620/AT4G32551/AT1G19250/AT4G16960/AT3G06550/AT2G29720/AT5G60280/AT2G16870/AT1G56510/AT4G30440/AT5G02500/AT5G06780/AT4G16990/AT1G05010/AT1G32740/AT4G11650/AT5G67300…
GO:0042578	phosphoric ester hydrolase activity	340	-0.274947	-1.1123	0.204108	0.714455	3301	tags=19%, list=16%, signal=16%	AT5G65140/AT4G03080/AT5G63980/AT3G16785/AT1G08940/AT5G51260/AT1G01610/AT2G33700/AT1G34750/AT5G64400/AT3G16800/AT5G03080/AT4G11830/AT1G06520/AT5G46410/AT5G01700/AT5G58700/AT3G47220/AT1G17340/AT1G56360/AT5G36250/AT3G11430/AT3G14205/AT5G59490/AT5G27930/AT4G18010/AT4G39770/AT3G20500/AT3G17250/AT5G10740/AT3G03520/AT3G12620/AT1G09160/AT1G05000/AT2G20630/AT1G18480/AT2G18700/AT2G42010/AT1G48040/AT4G22590…
GO:0022616	DNA strand elongation	13	0.496155	1.2385	0.204545	0.714455	5469	tags=54%, list=27%, signal=39%	AT5G22470/AT4G02390/AT2G31320/AT2G29570/AT5G67100/AT1G07370/AT1G66730
GO:0017004	cytochrome complex assembly	16	-0.497794	-1.2246	0.204586	0.714455	2850	tags=38%, list=14%, signal=32%	AT1G15220/ATMG00110/AT3G51790/ATMG00180/AT5G25450
GO:0007032	endosome organization	20	-0.473372	-1.22161	0.204626	0.714455	4360	tags=55%, list=21%, signal=43%	AT1G15130/AT4G29440/AT2G26890/AT4G28000/AT1G20110/AT4G29160/AT4G35730/AT1G64110/AT5G09260/AT5G52882
GO:0015103	inorganic anion transmembrane transporter activity	74	-0.350813	-1.17162	0.204724	0.714455	1725	tags=18%, list=8%, signal=16%	AT1G73020/AT3G01550/AT5G40890/AT1G12110/AT1G08090/AT4G21680/AT5G09470/AT4G27970/AT3G45060/AT3G45700/AT3G27170/AT5G24030
GO:0097366	response to bronchodilator	17	0.470323	1.24104	0.205069	0.714551	3375	tags=35%, list=17%, signal=29%	AT1G76800/AT5G04950/AT1G21140/AT3G08040/AT3G53280/AT1G49820
GO:0034284	response to monosaccharide	50	-0.388714	-1.21418	0.205212	0.714551	2716	tags=36%, list=13%, signal=31%	AT2G35050/AT1G65220/AT5G03730/AT1G04700/AT2G28900/AT5G57610/AT5G57090/AT4G37220/AT5G28770/AT3G49340/AT4G18300/AT5G45890/AT4G22970/AT1G61800/AT3G02570/AT3G16690/AT5G64750
GO:0045551	cinnamyl-alcohol dehydrogenase activity	11	0.510858	1.22556	0.205628	0.714551	3409	tags=36%, list=17%, signal=30%	AT4G37970/AT2G21730/AT2G21890/AT4G39330
GO:0052747	sinapyl alcohol dehydrogenase activity	11	0.510858	1.22556	0.205628	0.714551	3409	tags=36%, list=17%, signal=30%	AT4G37970/AT2G21730/AT2G21890/AT4G39330
GO:0010639	negative regulation of organelle organization	55	0.334948	1.1756	0.207447	0.717837	4292	tags=31%, list=21%, signal=24%	AT4G29340/AT5G11470/AT3G24140/AT1G13448/AT1G04020/AT1G69400/AT4G39100/AT5G57320/AT3G18524/AT1G49910/AT5G07780/AT3G48430/AT2G14825/AT3G15120/AT3G63270/AT4G18470/AT2G20190
GO:0051603	proteolysis involved in cellular protein catabolic process	463	-0.262848	-1.08811	0.207479	0.717837	2084	tags=13%, list=10%, signal=12%	AT3G18980/AT2G22690/AT3G49340/AT3G17280/AT5G63160/AT5G52060/AT1G26800/AT5G50430/AT1G66660/AT2G42350/AT5G43190/AT1G79110/AT3G61460/AT4G35480/AT2G25740/AT5G64920/AT5G45890/AT4G15410/AT2G22010/AT3G13672/AT2G41980/AT5G39250/AT3G19470/AT3G18773/AT2G42030/AT2G25490/AT5G59550/AT2G39720/AT3G62690/AT4G17895/AT5G05810/AT1G25150/AT2G35000/AT5G26260/AT2G37580/AT2G34080/AT1G15100/AT2G02870/AT5G60820/AT3G09350…
GO:0051248	negative regulation of protein metabolic process	102	0.292538	1.13122	0.207602	0.717837	2964	tags=21%, list=15%, signal=18%	AT1G61470/AT2G31980/AT1G29770/AT3G50630/AT5G22250/AT1G79030/AT3G24140/AT3G44260/AT2G35430/AT2G20470/AT1G01760/AT1G04020/AT4G39100/AT5G61330/AT5G63190/AT5G57050/AT1G66810/AT2G32710/AT2G23430/AT3G48430/AT2G14825
GO:0005179	hormone activity	19	-0.469095	-1.2091	0.207679	0.717837	4279	tags=53%, list=21%, signal=42%	AT2G33775/AT3G23805/AT4G14010/AT1G02900/AT4G13950/AT3G16570/AT3G25170/AT3G05490/AT4G15800
GO:0006271	DNA strand elongation involved in DNA replication	11	0.509344	1.22193	0.207792	0.717837	5469	tags=64%, list=27%, signal=47%	AT5G22470/AT4G02390/AT2G31320/AT2G29570/AT5G67100/AT1G07370/AT1G66730
GO:0016621	cinnamoyl-CoA reductase activity	13	-0.519637	-1.23311	0.208185	0.717837	5372	tags=46%, list=26%, signal=34%	AT4G30470/AT2G33590/AT1G80820/AT1G76470/AT1G09500
GO:0000977	RNA polymerase II regulatory region sequence-specific DNA binding	86	-0.331068	-1.14822	0.208333	0.717837	1580	tags=14%, list=8%, signal=13%	AT3G24050/AT2G42380/AT1G71692/AT5G51790/AT4G25410/AT4G25400/AT3G58120/AT5G51780/AT4G26150/AT1G62975/AT1G12540
GO:0001012	RNA polymerase II regulatory region DNA binding	86	-0.331068	-1.14822	0.208333	0.717837	1580	tags=14%, list=8%, signal=13%	AT3G24050/AT2G42380/AT1G71692/AT5G51790/AT4G25410/AT4G25400/AT3G58120/AT5G51780/AT4G26150/AT1G62975/AT1G12540
GO:0006338	chromatin remodeling	39	0.357107	1.17026	0.208845	0.718172	8217	tags=64%, list=40%, signal=38%	AT5G64630/AT4G39100/AT1G65470/AT2G36720/AT3G15120/AT2G33610/AT5G63550/AT2G23740/AT5G16940/AT3G17590/AT5G37055/AT4G09550/AT3G57300/AT1G04400/AT1G73790/AT1G57820/AT4G37280/AT5G18620/AT4G22140/AT2G36740/AT2G28290/AT3G33520/AT3G50690/AT5G22330/AT2G25170
GO:0010091	trichome branching	28	-0.425281	-1.19479	0.209059	0.718172	884	tags=14%, list=4%, signal=14%	AT1G74430/AT1G18710/AT4G20780
GO:0010598	NAD(P)H dehydrogenase complex (plastoquinone)	13	0.490791	1.22511	0.209091	0.718172	3231	tags=31%, list=16%, signal=26%	AT4G37925/AT4G23890/AT1G64770/AT4G09350
GO:0043161	proteasome-mediated ubiquitin-dependent protein catabolic process	277	-0.281182	-1.12106	0.209512	0.71886	2601	tags=16%, list=13%, signal=14%	AT3G18980/AT2G22690/AT3G17280/AT5G63160/AT5G52060/AT1G26800/AT5G50430/AT2G42350/AT5G43190/AT1G79110/AT3G61460/AT4G35480/AT2G25740/AT5G64920/AT4G15410/AT5G39250/AT3G19470/AT3G18773/AT5G59550/AT2G39720/AT3G62690/AT5G05810/AT1G25150/AT2G35000/AT2G37580/AT1G15100/AT2G02870/AT5G60820/AT3G09350/AT2G35910/AT2G01150/AT2G22890/AT3G43430/AT1G55530/AT1G49200/AT3G27220/AT1G14200/AT2G30600/AT1G15670/AT1G14330…
GO:0035196	production of miRNAs involved in gene silencing by miRNA	11	0.507136	1.21663	0.209957	0.719483	6894	tags=73%, list=34%, signal=48%	AT5G23080/AT3G20550/AT1G24706/AT1G09700/AT2G28380/AT3G43920/AT4G24500/AT4G20910
GO:0006066	alcohol metabolic process	120	-0.313892	-1.14332	0.210134	0.719483	3083	tags=19%, list=15%, signal=16%	AT4G34650/AT1G19630/AT2G23410/AT1G52400/AT5G61760/AT3G55440/AT1G07240/AT5G16760/AT3G61460/AT4G18010/AT3G21780/AT3G01640/AT1G74340/AT3G23410/AT1G14520/AT3G02040/AT1G42470/AT5G41120/AT5G41080/AT4G26690/AT4G08170/AT2G19800
GO:0071732	cellular response to nitric oxide	15	0.477709	1.23751	0.210407	0.71961	3375	tags=40%, list=17%, signal=33%	AT1G76800/AT5G04950/AT1G21140/AT3G08040/AT3G53280/AT1G49820
GO:0044257	cellular protein catabolic process	17	-0.481923	-1.20738	0.211268	0.71961	2835	tags=24%, list=14%, signal=20%	AT4G17480/AT5G47330/AT4G17470
GO:0006349	regulation of gene expression by genetic imprinting	13	0.488735	1.21997	0.211364	0.71961	3335	tags=23%, list=16%, signal=19%	AT4G25530/AT3G49240/AT4G02020
GO:0071514	genetic imprinting	13	0.488735	1.21997	0.211364	0.71961	3335	tags=23%, list=16%, signal=19%	AT4G25530/AT3G49240/AT4G02020
GO:0000151	ubiquitin ligase complex	162	-0.297931	-1.12429	0.211429	0.71961	2455	tags=12%, list=12%, signal=10%	AT5G63160/AT1G31350/AT2G01330/AT1G12820/AT2G25740/AT2G22010/AT5G39250/AT3G26810/AT2G42620/AT2G02870/AT1G02670/AT5G52250/AT3G27220/AT2G30600/AT1G15670/AT1G14330/AT5G67480/AT5G25350
GO:0071731	response to nitric oxide	16	0.474055	1.24229	0.211494	0.71961	3375	tags=38%, list=17%, signal=31%	AT1G76800/AT5G04950/AT1G21140/AT3G08040/AT3G53280/AT1G49820
GO:0006549	isoleucine metabolic process	11	-0.555682	-1.24165	0.212963	0.72204	6091	tags=55%, list=30%, signal=38%	AT1G10070/AT1G14810/AT3G49680/AT3G20390/AT2G31810
GO:0009097	isoleucine biosynthetic process	11	-0.555682	-1.24165	0.212963	0.72204	6091	tags=55%, list=30%, signal=38%	AT1G10070/AT1G14810/AT3G49680/AT3G20390/AT2G31810
GO:0010048	vernalization response	11	-0.55592	-1.24218	0.212963	0.72204	5276	tags=55%, list=26%, signal=40%	AT3G24440/AT3G18990/AT4G22950/AT5G65080/AT5G65070
GO:0010817	regulation of hormone levels	303	-0.27612	-1.10645	0.213094	0.72204	2263	tags=17%, list=11%, signal=15%	AT4G16760/AT4G29740/AT2G27760/AT4G28410/AT1G63030/AT4G32810/AT1G18870/AT1G19640/AT5G24530/AT5G07200/AT5G42650/AT1G25410/AT5G07010/AT3G25780/AT4G10500/AT3G47190/AT5G58660/AT4G39030/AT3G63440/AT5G43890/AT3G45140/AT1G12610/AT1G75450/AT3G63110/AT2G42620/AT5G27520/AT3G48520/AT1G78100/AT2G06050/AT1G14120/AT3G04070/AT3G62150/AT2G19620/AT2G23580/AT1G02400/AT4G10490/AT3G03990/AT2G46370/AT1G44350/AT4G28720…
GO:0090305	nucleic acid phosphodiester bond hydrolysis	66	0.321457	1.15871	0.213333	0.722102	7133	tags=42%, list=35%, signal=28%	AT3G09160/AT1G24450/AT1G06720/AT5G51730/AT3G66652/AT4G04885/AT5G59980/AT3G25940/AT3G16260/AT5G13480/AT5G57880/AT2G25355/AT3G05210/AT5G41150/AT3G04770/AT2G26970/AT1G09700/AT3G12990/AT1G01210/AT4G24710/AT5G22100/AT5G27700/AT5G08180/AT3G13290/AT1G12650/AT4G20910/AT3G60500/AT1G60080
GO:0022821	potassium ion antiporter activity	13	0.487806	1.21766	0.213636	0.722379	7137	tags=54%, list=35%, signal=35%	AT5G13740/AT5G27150/AT5G13750/AT3G05030/AT3G06370/AT4G00630/AT2G01980
GO:0005682	U5 snRNP	18	0.45516	1.21771	0.214123	0.722516	202	tags=6%, list=1%, signal=6%	AT4G20440
GO:0071669	plant-type cell wall organization or biogenesis	165	-0.294936	-1.11989	0.214286	0.722516	1963	tags=19%, list=10%, signal=17%	AT1G02720/AT3G01190/AT4G11290/AT1G05240/AT3G03670/AT5G64740/AT5G50750/AT3G03050/AT3G08900/AT5G06700/AT4G30270/AT3G28550/AT3G54590/AT5G15650/AT5G16910/AT5G57550/AT5G64100/AT3G54580/AT5G17820/AT1G23720/AT3G47380/AT1G30870/AT1G05250/AT5G62350/AT5G39580/AT4G26010/AT4G01630/AT5G62360/AT1G10550/AT3G15370
GO:0038023	signaling receptor activity	254	0.250393	1.08862	0.214876	0.722516	4230	tags=36%, list=21%, signal=29%	AT1G65800/AT4G30520/AT2G01950/AT5G47070/AT5G20480/AT4G28490/AT2G01830/AT4G35030/AT3G45410/AT5G23170/AT3G05140/AT3G08760/AT1G21590/AT2G41820/AT1G77280/AT1G60800/AT4G35290/AT2G33580/AT4G21380/AT2G29100/AT1G72540/AT4G34440/AT3G09780/AT1G69790/AT2G42960/AT1G20650/AT5G06820/AT5G53160/AT1G04310/AT1G05200/AT2G18890/AT2G17820/AT3G13380/AT4G13190/AT5G46570/AT3G25560/AT2G05940/AT4G02010/AT3G59420/AT4G02482…
GO:0010557	positive regulation of macromolecule biosynthetic process	335	0.235915	1.05874	0.215311	0.722516	2667	tags=15%, list=13%, signal=13%	AT1G32640/AT4G25490/AT5G61600/AT4G23810/AT5G51870/AT1G73870/AT5G22290/AT1G32770/AT1G46768/AT1G79180/AT3G61910/AT5G50080/AT4G18880/AT5G11470/AT3G24140/AT1G49010/AT5G44160/AT4G17880/AT5G13250/AT4G28500/AT4G39410/AT2G46770/AT5G26630/AT1G28470/AT5G48670/AT2G27230/AT4G01540/AT1G64490/AT3G10500/AT2G03710/AT5G47220/AT2G47460/AT1G04020/AT5G49430/AT2G38340/AT2G22540/AT5G61330/AT1G55350/AT2G46680/AT4G09960…
GO:0022804	active transmembrane transporter activity	451	-0.263011	-1.08801	0.215403	0.722516	3577	tags=19%, list=18%, signal=16%	AT5G65380/AT2G04080/AT1G08920/AT2G20780/AT1G05580/AT2G28180/AT2G34250/AT5G45380/AT1G64170/AT5G57110/AT5G46540/AT1G71880/AT1G76670/AT3G52310/AT2G39480/AT3G47950/AT5G13450/AT3G53480/AT1G69870/AT3G58730/AT5G61730/AT3G47780/AT1G30420/ATCG00480/AT3G21080/AT1G72750/AT1G71890/AT5G63850/AT1G12600/AT1G08930/AT4G29900/AT5G56450/AT3G47750/AT5G23270/AT1G04070/AT2G38290/AT3G60330/AT1G66760/AT5G41610/AT1G64200…
GO:0009789	positive regulation of abscisic acid-activated signaling pathway	43	-0.395028	-1.20908	0.215686	0.722516	4701	tags=47%, list=23%, signal=36%	AT2G32460/AT1G70810/AT1G51940/AT1G70800/AT3G15730/AT5G37740/AT1G05100/AT4G33950/AT1G52400/AT3G57120/AT5G41790/AT3G17980/AT2G01540/AT1G70790/AT5G65160/AT1G35670/AT1G15100/AT5G46590/AT2G01150
GO:1901421	positive regulation of response to alcohol	43	-0.395028	-1.20908	0.215686	0.722516	4701	tags=47%, list=23%, signal=36%	AT2G32460/AT1G70810/AT1G51940/AT1G70800/AT3G15730/AT5G37740/AT1G05100/AT4G33950/AT1G52400/AT3G57120/AT5G41790/AT3G17980/AT2G01540/AT1G70790/AT5G65160/AT1G35670/AT1G15100/AT5G46590/AT2G01150
GO:1905959	positive regulation of cellular response to alcohol	43	-0.395028	-1.20908	0.215686	0.722516	4701	tags=47%, list=23%, signal=36%	AT2G32460/AT1G70810/AT1G51940/AT1G70800/AT3G15730/AT5G37740/AT1G05100/AT4G33950/AT1G52400/AT3G57120/AT5G41790/AT3G17980/AT2G01540/AT1G70790/AT5G65160/AT1G35670/AT1G15100/AT5G46590/AT2G01150
GO:0010393	galacturonan metabolic process	128	-0.3113	-1.14639	0.215859	0.722516	2773	tags=23%, list=14%, signal=20%	AT3G27400/AT4G01750/AT1G11580/AT3G25140/AT2G26440/AT3G29360/AT5G64640/AT1G02720/AT5G47780/AT5G41040/AT1G53840/AT1G24170/AT5G04310/AT5G20860/AT4G15980/AT4G02320/AT1G53830/AT4G02330/AT5G06700/AT1G78240/AT1G23200/AT3G49220/AT3G01040/AT3G50760/AT3G58790/AT4G02130/AT2G33570/AT2G47550/AT2G40230
GO:0001067	regulatory region nucleic acid binding	338	-0.271245	-1.09751	0.216113	0.722516	2916	tags=20%, list=14%, signal=18%	AT2G39880/AT1G61730/AT1G58100/AT5G67300/AT5G63790/AT5G05410/AT4G38620/AT5G66730/AT1G21910/AT2G36890/AT3G11020/AT5G65790/AT4G16141/AT5G43700/AT1G64105/AT3G24050/AT5G16560/AT1G24625/AT5G52020/AT4G09820/AT2G42380/AT4G22360/AT1G76580/AT3G27785/AT1G04240/AT5G52600/AT2G26150/AT2G43140/AT1G71692/AT5G40350/AT1G48000/AT1G75490/AT5G60200/AT1G51450/AT1G12610/AT5G51790/AT4G34990/AT5G59780/AT2G13960/AT1G05805…
GO:0044212	transcription regulatory region DNA binding	338	-0.271245	-1.09751	0.216113	0.722516	2916	tags=20%, list=14%, signal=18%	AT2G39880/AT1G61730/AT1G58100/AT5G67300/AT5G63790/AT5G05410/AT4G38620/AT5G66730/AT1G21910/AT2G36890/AT3G11020/AT5G65790/AT4G16141/AT5G43700/AT1G64105/AT3G24050/AT5G16560/AT1G24625/AT5G52020/AT4G09820/AT2G42380/AT4G22360/AT1G76580/AT3G27785/AT1G04240/AT5G52600/AT2G26150/AT2G43140/AT1G71692/AT5G40350/AT1G48000/AT1G75490/AT5G60200/AT1G51450/AT1G12610/AT5G51790/AT4G34990/AT5G59780/AT2G13960/AT1G05805…
GO:0000922	spindle pole	18	0.454422	1.21574	0.216401	0.722631	4355	tags=39%, list=21%, signal=31%	AT1G14690/AT5G06680/AT1G27920/AT1G79890/AT1G80210/AT4G26760/AT2G35630
GO:1902749	regulation of cell cycle G2/M phase transition	17	0.462763	1.22109	0.21659	0.722631	5471	tags=35%, list=27%, signal=26%	AT1G15570/AT2G44950/AT4G30870/AT3G54180/AT1G76540/AT2G38620
GO:0071241	cellular response to inorganic substance	58	-0.367676	-1.1835	0.2176	0.724809	4717	tags=38%, list=23%, signal=29%	AT1G04700/AT3G20770/AT1G66340/AT5G57610/AT2G37430/AT4G27870/AT3G25190/AT2G19590/AT5G56010/AT3G60320/AT4G27860/AT5G07320/AT1G08830/AT1G12820/AT4G20260/AT1G08090/AT5G24290/AT5G10720/AT3G45060/AT5G61810/AT3G53600
GO:1900425	negative regulation of defense response to bacterium	12	0.488048	1.19919	0.217687	0.724809	4421	tags=42%, list=22%, signal=33%	AT4G14465/AT1G20160/AT5G18650/AT1G03160/AT5G62570
GO:0005623	cell	19	-0.464863	-1.19819	0.21815	0.72561	1124	tags=21%, list=6%, signal=20%	AT5G41080/AT2G42580/AT3G58620
GO:0098590	plasma membrane region	30	0.39104	1.19861	0.218527	0.725865	2964	tags=27%, list=15%, signal=23%	AT1G73590/AT1G79030/AT5G01170/AT4G24580/AT5G64870/AT5G14870/AT3G09070/AT2G14825
GO:0016713	oxidoreductase activity, acting on paired donors, with incorporation or reduction of molecular oxygen, reduced iron-sulfur protein as one donor, and incorporation of one atom of oxygen	14	-0.516022	-1.23969	0.218861	0.725865	2274	tags=29%, list=11%, signal=25%	AT4G00360/AT5G52320/AT2G27690
GO:0045862	positive regulation of proteolysis	17	0.459654	1.21289	0.218894	0.725865	4097	tags=35%, list=20%, signal=28%	AT1G79030/AT2G19710/AT5G18650/AT2G16090/AT1G05890/AT2G31510
GO:0051275	beta-glucan catabolic process	24	0.415712	1.19636	0.21957	0.726903	2160	tags=33%, list=11%, signal=30%	AT1G64390/AT1G71380/AT5G63250/AT5G63230/AT4G11050/AT1G70710/AT4G23560/AT4G39010
GO:0098657	import into cell	102	-0.317884	-1.13069	0.219697	0.726903	2714	tags=14%, list=13%, signal=12%	AT4G17480/AT1G25240/AT5G57015/AT5G22770/AT5G42090/AT4G13420/AT2G25430/AT5G47330/AT4G17470/AT1G05020/AT1G75310/AT5G46330/AT5G10410
GO:0045927	positive regulation of growth	41	-0.398789	-1.20408	0.219966	0.726903	4090	tags=37%, list=20%, signal=29%	AT1G67360/AT1G70000/AT5G53000/AT4G32551/AT1G13710/AT4G35730/AT5G07290/AT5G24630/AT3G05500/AT1G64110/AT5G56170/AT5G09890/AT3G59900/AT5G52882
GO:0008643	carbohydrate transport	103	-0.31795	-1.13002	0.220521	0.726903	3474	tags=22%, list=17%, signal=19%	AT1G06470/AT2G20780/AT5G65020/AT4G32272/AT4G17550/AT1G12600/AT1G08930/AT5G23270/AT1G12500/AT3G47420/AT3G11320/AT3G19930/AT3G01550/AT1G08890/AT3G05155/AT1G11260/AT1G19450/AT4G25010/AT1G61800/AT1G75220/AT3G16690/AT4G36670
GO:0005342	organic acid transmembrane transporter activity	112	0.285824	1.11615	0.220544	0.726903	2237	tags=19%, list=11%, signal=17%	AT4G38250/AT4G24570/AT4G16160/AT1G31820/AT1G25530/AT3G28960/AT2G37460/AT2G34960/AT1G01070/AT2G38120/AT4G01430/AT2G21050/AT2G39890/AT1G77690/AT1G25480/AT4G08290/AT5G46110/AT5G52050/AT3G54830/AT2G37450/AT4G08300
GO:0046943	carboxylic acid transmembrane transporter activity	112	0.285824	1.11615	0.220544	0.726903	2237	tags=19%, list=11%, signal=17%	AT4G38250/AT4G24570/AT4G16160/AT1G31820/AT1G25530/AT3G28960/AT2G37460/AT2G34960/AT1G01070/AT2G38120/AT4G01430/AT2G21050/AT2G39890/AT1G77690/AT1G25480/AT4G08290/AT5G46110/AT5G52050/AT3G54830/AT2G37450/AT4G08300
GO:0015629	actin cytoskeleton	15	0.470738	1.21945	0.221719	0.728262	441	tags=13%, list=2%, signal=13%	AT4G34970/AT4G29340
GO:0048440	carpel development	15	0.471848	1.22233	0.221719	0.728262	3739	tags=40%, list=18%, signal=33%	AT1G32240/AT2G03710/AT1G69180/AT4G36930/AT4G15180/AT1G62360
GO:0043022	ribosome binding	27	-0.427524	-1.19015	0.221837	0.728262	7239	tags=52%, list=36%, signal=33%	AT1G43860/AT3G55620/AT1G08410/AT5G11900/AT2G40290/AT1G13950/AT5G58190/AT5G05470/AT1G65540/AT2G03270/AT1G27960/AT3G49725/AT4G27650
GO:0017137	Rab GTPase binding	37	-0.401017	-1.19613	0.221849	0.728262	2016	tags=19%, list=10%, signal=17%	AT3G07890/AT5G52580/AT3G02460/AT4G28550/AT4G27100/AT4G14368
GO:0016324	apical plasma membrane	13	0.483382	1.20661	0.222727	0.72997	2194	tags=31%, list=11%, signal=27%	AT5G01170/AT4G24580/AT5G14870/AT3G09070
GO:0098661	inorganic anion transmembrane transport	12	-0.533029	-1.2284	0.222816	0.72997	1604	tags=33%, list=8%, signal=31%	AT5G09470/AT3G45700/AT3G27170
GO:0016891	endoribonuclease activity, producing 5'-phosphomonoesters	30	0.389365	1.19348	0.223278	0.730748	4901	tags=40%, list=24%, signal=30%	AT1G24090/AT3G20420/AT5G51080/AT4G31150/AT1G24450/AT3G13740/AT5G59980/AT2G16650/AT3G16260/AT4G21900/AT1G11190/AT2G25100
GO:0045851	pH reduction	17	-0.47824	-1.19816	0.223592	0.731041	7425	tags=65%, list=37%, signal=41%	AT4G38920/AT3G42050/AT2G16510/AT2G21410/AT4G39080/AT3G28710/AT3G28715/AT1G19910/AT1G72300/AT4G17470
GO:0016102	diterpenoid biosynthetic process	20	-0.463604	-1.1964	0.224199	0.732083	1828	tags=30%, list=9%, signal=27%	AT3G47190/AT5G58660/AT1G02400/AT5G61780/AT1G61120
GO:0010218	response to far red light	57	-0.368653	-1.18033	0.224359	0.732083	2851	tags=21%, list=14%, signal=18%	AT5G38430/AT5G44110/AT5G02200/AT2G32250/AT1G52520/AT5G15840/AT1G02340/AT5G52250/AT1G14920/AT4G16780/AT2G02950
GO:0032392	DNA geometric change	20	0.438011	1.22588	0.225	0.732518	6968	tags=65%, list=34%, signal=43%	AT4G36020/AT2G24250/AT2G07690/AT1G44900/AT4G02060/AT5G44635/AT2G17036/AT2G16440/AT1G27880/AT5G46280/AT3G12530/AT3G02680/AT4G25120
GO:0046916	cellular transition metal ion homeostasis	64	0.322102	1.15535	0.225131	0.732518	3298	tags=28%, list=16%, signal=24%	AT1G76800/AT5G52750/AT3G24450/AT5G52760/AT2G28660/AT5G63530/AT2G38170/AT3G06130/AT5G26690/AT5G52740/AT3G51860/AT1G23000/AT1G21140/AT3G08040/AT2G37390/AT1G71050/AT3G07600/AT3G48970
GO:0000981	DNA-binding transcription factor activity, RNA polymerase II-specific	162	0.265013	1.10393	0.225166	0.732518	1899	tags=20%, list=9%, signal=18%	AT4G33450/AT2G20100/AT1G31050/AT2G46410/AT5G26660/AT3G50870/AT1G18570/AT1G63910/AT1G06180/AT1G79180/AT3G50060/AT5G16600/AT2G18380/AT3G13540/AT3G46130/AT4G21440/AT5G61420/AT1G51140/AT5G25830/AT4G29100/AT5G66320/AT5G26630/AT1G26780/AT1G17950/AT5G07690/AT5G48670/AT3G60530/AT5G56860/AT3G19500/AT1G74080/AT2G47460/AT1G27660
GO:0034212	peptide N-acetyltransferase activity	34	0.370503	1.17409	0.22549	0.732843	3291	tags=26%, list=16%, signal=22%	AT5G36740/AT5G36670/AT2G32030/AT1G55970/AT3G48360/AT1G05380/AT1G18335/AT5G09740/AT1G32750
GO:0090332	stomatal closure	10	-0.564029	-1.2273	0.226168	0.734315	5336	tags=90%, list=26%, signal=66%	AT1G12480/AT2G31870/AT2G39050/AT3G58490/AT3G14270/AT5G02500/AT1G08860/AT4G20260
GO:0008092	cytoskeletal protein binding	271	0.245084	1.07022	0.226667	0.735202	6249	tags=41%, list=31%, signal=28%	AT2G30500/AT4G17220/AT4G34970/AT4G29340/AT2G43800/AT4G14760/AT1G29170/AT5G54280/AT5G23430/AT5G48360/AT5G20450/AT5G62580/AT2G07170/AT4G24860/AT3G17680/AT1G42980/AT3G10310/AT2G31300/AT4G02710/AT1G14690/AT1G18410/AT2G33990/AT1G21730/AT1G59910/AT3G15050/AT2G21300/AT5G57320/AT3G19960/AT2G47920/AT5G07780/AT1G11160/AT5G06680/AT1G50360/AT5G47820/AT1G27920/AT3G22790/AT2G14825/AT1G14840/AT4G27060/AT4G26660…
GO:0010093	specification of floral organ identity	10	0.513415	1.21687	0.226981	0.73549	2571	tags=30%, list=13%, signal=26%	AT1G70510/AT2G31650/AT5G20240
GO:0006633	fatty acid biosynthetic process	147	-0.301173	-1.12767	0.227723	0.736716	5124	tags=31%, list=25%, signal=23%	AT2G45690/AT5G08415/AT1G67560/AT4G34510/AT2G38040/AT1G04710/AT1G08510/AT1G66430/AT3G06850/AT4G34520/AT1G17420/AT3G16170/AT3G22400/AT4G13050/AT4G24510/AT5G16390/AT3G29160/AT2G46720/AT2G31360/AT3G10280/AT4G33950/AT2G28630/AT1G25450/AT1G06360/AT5G43760/AT4G34250/AT1G13580/AT2G26640/AT1G19640/AT3G52160/AT5G42650/AT1G01120/AT3G45140/AT3G11170/AT1G19440/AT1G76680/AT2G16280/AT1G76690/AT5G16010/AT2G06050…
GO:0032269	negative regulation of cellular protein metabolic process	99	0.28821	1.10411	0.227811	0.736716	2964	tags=20%, list=15%, signal=17%	AT1G61470/AT2G31980/AT1G29770/AT3G50630/AT5G22250/AT1G79030/AT3G24140/AT3G44260/AT2G35430/AT2G20470/AT1G01760/AT1G04020/AT4G39100/AT5G63190/AT5G57050/AT1G66810/AT2G32710/AT2G23430/AT3G48430/AT2G14825
GO:0030015	CCR4-NOT core complex	17	0.451483	1.19133	0.228111	0.736955	1032	tags=18%, list=5%, signal=17%	AT1G61470/AT5G22250/AT3G44260
GO:0030276	clathrin binding	25	-0.430539	-1.19381	0.228669	0.738028	3454	tags=36%, list=17%, signal=30%	AT2G20760/AT5G11710/AT2G43160/AT3G11130/AT1G25240/AT5G42090/AT2G25430/AT1G05020
GO:0006366	transcription by RNA polymerase II	50	0.331853	1.14806	0.229381	0.739395	5112	tags=38%, list=25%, signal=29%	AT2G20100/AT1G31050/AT1G51140/AT4G29100/AT2G15400/AT3G19500/AT1G28560/AT1G27660/AT4G30980/AT3G61420/AT5G64980/AT1G54250/AT1G61660/AT1G10170/AT1G03040/AT5G05660/AT1G72440/AT5G65490/AT3G20640
GO:2000012	regulation of auxin polar transport	20	0.437292	1.22387	0.229545	0.739395	2755	tags=35%, list=14%, signal=30%	AT1G68130/AT3G03850/AT5G64770/AT3G03840/AT5G18010/AT1G17140/AT2G01940
GO:0001763	morphogenesis of a branching structure	20	0.431598	1.20793	0.231818	0.74482	2521	tags=55%, list=12%, signal=48%	AT3G18550/AT3G24300/AT1G73870/AT5G61480/AT2G27990/AT3G24420/AT5G02030/AT3G14067/AT2G26170/AT3G15170/AT4G37470
GO:1905421	regulation of plant organ morphogenesis	20	0.434387	1.21574	0.231818	0.74482	5891	tags=45%, list=29%, signal=32%	AT2G46410/AT1G49010/AT4G34600/AT1G11130/AT2G42200/AT2G46870/AT4G20140/AT2G26330/AT1G04400
GO:0031625	ubiquitin protein ligase binding	92	-0.325643	-1.14022	0.232061	0.74482	871	tags=9%, list=4%, signal=8%	AT2G22890/AT3G12580/AT3G27220/AT2G30600/AT1G15670/AT1G14330/AT5G67480
GO:0010975	regulation of neuron projection development	15	-0.494571	-1.20119	0.232143	0.74482	1238	tags=33%, list=6%, signal=31%	AT4G35730/AT1G64110/AT5G09890/AT5G52882
GO:2000280	regulation of root development	60	0.31641	1.12768	0.232376	0.744836	2551	tags=23%, list=13%, signal=20%	AT1G77110/AT3G54720/AT5G46260/AT2G46410/AT2G40530/AT1G66700/AT4G34600/AT2G42640/AT1G67710/AT5G46270/AT3G15150/AT2G47270/AT1G77000/AT1G11130
GO:0045037	protein import into chloroplast stroma	17	0.447647	1.1812	0.232719	0.745203	5147	tags=35%, list=25%, signal=26%	AT4G02482/AT1G04945/AT5G22640/AT4G02510/AT4G03320/AT2G04030
GO:0022900	electron transport chain	88	-0.323796	-1.13079	0.233232	0.745524	6578	tags=44%, list=32%, signal=30%	AT5G51040/AT4G34700/AT5G67590/AT1G32550/AT4G32470/AT1G18730/AT3G27240/AT2G02510/AT2G27510/AT3G15640/AT3G02090/ATCG00680/AT5G05370/AT3G01440/ATCG00280/AT5G66760/AT4G37830/AT4G28070/AT2G01590/ATCG00270/ATCG00020/AT2G07718/ATMG00160/AT1G22840/ATMG00590/AT1G52710/AT3G27380/AT3G54050/AT5G40650/AT4G10040/AT4G32590/AT4G30490/AT2G01918/ATCG00720/ATCG00580/AT3G10860/ATMG00580/AT5G25450
GO:0000038	very long-chain fatty acid metabolic process	24	-0.430371	-1.18228	0.233276	0.745524	701	tags=29%, list=3%, signal=28%	AT2G31360/AT1G13580/AT5G16010/AT4G36830/AT1G26200/AT2G34770
GO:0007154	cell communication	221	0.254512	1.08901	0.234201	0.747747	2523	tags=13%, list=12%, signal=12%	AT2G01505/AT4G05380/AT5G27420/AT3G56980/AT2G01830/AT5G59305/AT3G08860/AT5G04150/AT5G05860/AT5G61420/AT1G73010/AT1G13300/AT5G07690/AT4G34220/AT2G41240/AT1G15460/AT3G47640/AT4G13195/AT1G01760/AT1G80760/AT1G20720/AT4G10380/AT3G62730/AT1G27320/AT5G18830/AT1G47980/AT1G62300/AT3G56970/AT3G51480
GO:0005771	multivesicular body	11	-0.547276	-1.22286	0.235185	0.748689	8156	tags=82%, list=40%, signal=49%	AT2G06530/AT5G53530/AT2G27600/AT3G10640/AT1G15130/AT3G47810/AT2G38410/AT4G26750
GO:0008250	oligosaccharyltransferase complex	10	0.507749	1.20344	0.235546	0.748689	8692	tags=70%, list=43%, signal=40%	AT2G35520/AT1G76400/AT4G29735/AT1G34130/AT4G21150/AT5G19690/AT2G01720
GO:0031401	positive regulation of protein modification process	85	-0.32828	-1.13205	0.235659	0.748689	962	tags=22%, list=5%, signal=21%	AT5G45190/AT5G12980/AT4G08470/AT4G36950/AT2G47410/AT1G05100/AT4G11920/AT4G19600/AT4G08960/AT2G32550/AT3G07980/AT1G53570/AT3G13530/AT1G07150/AT5G67080/AT4G26890/AT2G32510/AT5G55090
GO:0048564	photosystem I assembly	11	0.494804	1.18705	0.235931	0.748689	9534	tags=73%, list=47%, signal=39%	AT4G25910/AT3G55250/AT5G35220/AT4G15510/AT3G08010/AT1G22700/AT2G15820/AT5G42270
GO:0090701	specification of plant organ identity	11	0.495346	1.18835	0.235931	0.748689	6894	tags=64%, list=34%, signal=42%	AT1G70510/AT2G31650/AT5G20240/AT2G06990/AT2G45190/AT4G37180/AT4G20910
GO:2000026	regulation of multicellular organismal development	454	0.230397	1.06828	0.236994	0.748689	3488	tags=20%, list=17%, signal=17%	AT2G45680/AT3G21150/AT3G09870/AT4G15248/AT3G18550/AT5G03150/AT1G77110/AT1G60190/AT3G54720/AT5G51870/AT5G46260/AT1G20823/AT2G46410/AT2G35230/AT5G54470/AT2G01830/AT5G22290/AT3G50870/AT5G03680/AT1G06180/AT2G40530/AT2G40750/AT2G20180/AT1G66700/AT3G56400/AT2G21320/AT1G49010/AT2G19710/AT1G42550/AT4G34600/AT5G13250/AT5G48170/AT4G25530/AT2G42640/AT1G15570/AT5G38200/AT3G07650/AT2G31650/AT1G20160/AT5G57520…
GO:0099402	plant organ development	363	0.232455	1.05752	0.237374	0.748689	3234	tags=21%, list=16%, signal=18%	AT2G45680/AT5G03150/AT2G34650/AT2G46400/AT2G01420/AT3G54720/AT1G32240/AT5G06250/AT2G31160/AT3G18000/AT5G03680/AT1G73590/AT3G62100/AT3G09160/AT2G39800/AT2G46310/AT3G13730/AT5G10250/AT5G07180/AT5G64770/AT2G36910/AT4G24150/AT1G31880/AT1G70940/AT1G69780/AT1G04550/AT3G45640/AT1G21210/AT1G13300/AT4G36380/AT2G27230/AT4G31400/AT2G03710/AT3G59420/AT4G04920/AT1G06150/AT1G04020/AT3G52072/AT4G31160/AT3G20100…
GO:0048544	recognition of pollen	52	0.327131	1.13162	0.237467	0.748689	3579	tags=33%, list=18%, signal=27%	AT1G26796/AT1G65800/AT1G61460/AT4G21380/AT5G07600/AT1G65790/AT5G07520/AT2G41890/AT2G19130/AT4G22730/AT3G26860/AT1G61420/AT1G11410/AT4G00340/AT1G04645/AT5G07550/AT5G07540
GO:0015179	L-amino acid transmembrane transporter activity	19	0.437511	1.19226	0.237762	0.748689	4262	tags=37%, list=21%, signal=29%	AT1G31820/AT1G01070/AT4G01430/AT2G39890/AT5G05630/AT1G31830/AT1G79900
GO:0004722	protein serine/threonine phosphatase activity	84	-0.32876	-1.12838	0.237872	0.748689	2894	tags=23%, list=14%, signal=19%	AT1G34750/AT5G64400/AT3G16800/AT5G01700/AT5G36250/AT5G27930/AT3G17250/AT5G10740/AT3G12620/AT1G09160/AT2G20630/AT1G48040/AT3G11410/AT3G05580/AT1G47380/AT1G68410/AT5G02760/AT2G40180
GO:0004540	ribonuclease activity	85	0.296244	1.11804	0.238095	0.748689	6979	tags=48%, list=34%, signal=32%	AT1G61470/AT1G24090/AT5G22250/AT3G20420/AT3G44260/AT5G51080/AT5G14580/AT1G54440/AT4G31150/AT2G04270/AT1G24450/AT3G13740/AT5G59980/AT2G16650/AT3G16260/AT1G28260/AT4G21900/AT1G75660/AT5G63420/AT1G11190/AT2G25100/AT1G73875/AT2G40410/AT3G46210/AT2G26970/AT5G51170/AT5G42540/AT1G09700/AT1G30460/AT1G31500/AT3G12990/AT5G11350/AT3G43920/AT5G22100/AT1G80780/AT5G10960/AT1G26820/AT3G25430/AT1G48410/AT3G60500…
GO:1905428	regulation of plant organ formation	11	0.494084	1.18532	0.238095	0.748689	2970	tags=45%, list=15%, signal=39%	AT3G18550/AT5G13250/AT5G38200/AT1G58340/AT1G68800
GO:0009816	defense response to bacterium, incompatible interaction	48	0.336564	1.14509	0.238342	0.748689	1387	tags=17%, list=7%, signal=16%	AT4G23810/AT5G27420/AT4G14390/AT3G56710/AT5G26920/AT4G14400/AT4G03450/AT4G03500
GO:0010311	lateral root formation	35	-0.405848	-1.18756	0.238501	0.748689	997	tags=14%, list=5%, signal=14%	AT2G17500/AT4G37070/AT4G01630/AT4G13510
GO:0010078	maintenance of root meristem identity	13	0.4786	1.19467	0.238636	0.748689	7228	tags=69%, list=36%, signal=45%	AT2G27230/AT1G04020/AT5G48160/AT3G06010/AT3G08550/AT4G29040/AT5G19310/AT5G57280/AT4G24670
GO:0032509	endosome transport via multivesicular body sorting pathway	12	-0.526587	-1.21355	0.238859	0.748689	4893	tags=58%, list=24%, signal=44%	AT2G38410/AT1G32410/AT3G11530/AT1G17730/AT4G19003/AT4G21560
GO:0071985	multivesicular body sorting pathway	12	-0.526587	-1.21355	0.238859	0.748689	4893	tags=58%, list=24%, signal=44%	AT2G38410/AT1G32410/AT3G11530/AT1G17730/AT4G19003/AT4G21560
GO:0005544	calcium-dependent phospholipid binding	11	-0.546111	-1.22026	0.238889	0.748689	3299	tags=36%, list=16%, signal=30%	AT1G08860/AT2G38760/AT2G38750
GO:1903959	regulation of anion transmembrane transport	17	-0.471631	-1.1816	0.239437	0.748689	2957	tags=35%, list=15%, signal=30%	AT2G17290/AT4G23650/AT1G09995/AT3G11410/AT5G46330
GO:0044390	ubiquitin-like protein conjugating enzyme binding	18	-0.466374	-1.18223	0.239787	0.748689	1236	tags=17%, list=6%, signal=16%	AT1G19310/AT4G03510
GO:0030658	transport vesicle membrane	21	-0.455393	-1.19722	0.23993	0.748689	5102	tags=43%, list=25%, signal=32%	AT1G32050/AT5G39510/AT5G50440/AT1G08720/AT3G17440/AT1G61250/AT2G20840/AT5G26740
GO:0051050	positive regulation of transport	21	-0.455888	-1.19852	0.23993	0.748689	6801	tags=57%, list=33%, signal=38%	AT3G51140/AT4G27680/AT1G04117/AT3G59280/AT5G62000/AT4G18710/AT4G16144/AT1G02410/AT5G19820/AT4G19720/AT4G17470
GO:0005983	starch catabolic process	19	0.431171	1.17498	0.240093	0.748689	23	tags=5%, list=0%, signal=5%	AT5G17523
GO:0000176	nuclear exosome (RNase complex)	12	0.480468	1.18057	0.240363	0.748689	8165	tags=58%, list=40%, signal=35%	AT2G25355/AT3G46210/AT3G12990/AT3G60500/AT1G60080/AT5G35910/AT4G32175
GO:0019216	regulation of lipid metabolic process	63	-0.354798	-1.14503	0.24065	0.748689	4151	tags=32%, list=20%, signal=25%	AT5G65410/AT1G30010/AT1G64670/AT5G07350/AT4G01900/AT3G13900/AT2G45400/AT1G68320/AT2G01690/AT4G15400/AT1G13460/AT3G26790/AT1G63030/AT2G22780/AT3G27785/AT1G20780/AT1G12610/AT1G54540/AT5G61780
GO:0016573	histone acetylation	35	0.360588	1.15516	0.240964	0.748689	5289	tags=29%, list=26%, signal=21%	AT5G36740/AT5G36670/AT1G05380/AT1G54840/AT1G18335/AT3G24870/AT4G18470/AT2G18000/AT4G14920/AT3G24880
GO:0018393	internal peptidyl-lysine acetylation	35	0.360588	1.15516	0.240964	0.748689	5289	tags=29%, list=26%, signal=21%	AT5G36740/AT5G36670/AT1G05380/AT1G54840/AT1G18335/AT3G24870/AT4G18470/AT2G18000/AT4G14920/AT3G24880
GO:0018394	peptidyl-lysine acetylation	35	0.360588	1.15516	0.240964	0.748689	5289	tags=29%, list=26%, signal=21%	AT5G36740/AT5G36670/AT1G05380/AT1G54840/AT1G18335/AT3G24870/AT4G18470/AT2G18000/AT4G14920/AT3G24880
GO:0044389	ubiquitin-like protein ligase binding	93	-0.321893	-1.1284	0.241221	0.748689	871	tags=9%, list=4%, signal=8%	AT2G22890/AT3G12580/AT3G27220/AT2G30600/AT1G15670/AT1G14330/AT5G67480
GO:2000069	regulation of post-embryonic root development	16	0.456386	1.19598	0.241379	0.748689	3344	tags=31%, list=16%, signal=26%	AT1G77110/AT2G42640/AT1G77000/AT5G49660/AT1G14350
GO:1900140	regulation of seedling development	80	-0.333899	-1.1299	0.241758	0.74915	2655	tags=34%, list=13%, signal=29%	AT3G48990/AT1G78260/AT2G46780/AT5G53000/AT5G11310/AT2G13790/AT5G02500/AT5G66730/AT3G47620/AT1G07240/AT1G66350/AT5G13200/AT1G18100/AT3G06500/AT1G10560/AT2G45210/AT2G42620/AT2G46690/AT5G35750/AT1G22330/AT5G17490/AT1G75220/AT1G20450/AT4G26150/AT4G22620/AT4G12410
GO:0048471	perinuclear region of cytoplasm	56	-0.365904	-1.16728	0.241987	0.74915	5504	tags=36%, list=27%, signal=26%	AT4G38900/AT2G45490/AT4G39820/AT4G09200/AT4G10130/AT2G40620/AT4G28000/AT2G03270/AT5G07350/AT3G12145/AT3G06760/AT5G08160/AT2G37670/AT1G64110/AT1G42470/AT5G26740/AT5G53500/AT5G61780/AT5G52882
GO:0034214	protein hexamerization	11	-0.542364	-1.21189	0.242593	0.750312	4552	tags=45%, list=22%, signal=35%	AT4G28000/AT5G51070/AT1G64110/AT5G52882
GO:0015450	P-P-bond-hydrolysis-driven protein transmembrane transporter activity	17	-0.470254	-1.17815	0.242958	0.75073	3977	tags=29%, list=20%, signal=24%	AT2G34250/AT1G72750/AT1G04070/AT3G48570
GO:0034061	DNA polymerase activity	29	0.389633	1.18548	0.24356	0.75185	7403	tags=55%, list=36%, signal=35%	AT1G14460/AT4G24790/AT4G18820/AT1G67630/AT5G45720/AT2G02480/AT1G10520/AT5G67100/AT4G00060/AT5G52800/AT1G49980/AT3G20540/AT1G50840/AT2G42120/AT5G44740/AT1G67320
GO:0009853	photorespiration	42	-0.385705	-1.17287	0.243781	0.75185	6476	tags=40%, list=32%, signal=28%	AT4G34700/AT3G12290/AT5G47435/AT2G33220/AT4G39660/ATCG00490/AT3G54110/AT2G38660/AT1G04630/AT1G80380/AT2G45630/AT2G38400/AT1G12550/AT5G38430/AT1G19580/AT2G27730
GO:0032580	Golgi cisterna membrane	32	-0.405234	-1.1738	0.244863	0.75387	6460	tags=44%, list=32%, signal=30%	AT3G07680/AT2G47650/AT1G26690/AT4G12250/AT1G14010/AT3G62830/AT3G22845/AT5G44480/AT4G30440/AT2G34850/AT3G23820/AT1G61670/AT2G20370
GO:0009855	determination of bilateral symmetry	12	0.479392	1.17792	0.244898	0.75387	3292	tags=50%, list=16%, signal=42%	AT3G10590/AT5G01200/AT2G38090/AT2G34260/AT5G60690/AT5G04760
GO:0001085	RNA polymerase II transcription factor binding	25	0.402605	1.16845	0.245192	0.754065	3534	tags=36%, list=17%, signal=30%	AT3G50870/AT2G18380/AT5G25830/AT5G66320/AT3G60530/AT5G56860/AT5G47140/AT3G21175/AT3G51080
GO:0008216	spermidine metabolic process	13	-0.503209	-1.19412	0.245552	0.754458	3902	tags=62%, list=19%, signal=50%	AT5G15950/AT3G02470/AT1G28680/AT5G07080/AT4G34710/AT3G17717/AT3G25570
GO:0009225	nucleotide-sugar metabolic process	46	-0.375367	-1.16327	0.246353	0.75621	5413	tags=37%, list=27%, signal=27%	AT5G18070/AT2G27860/AT5G15490/AT1G26570/AT3G62830/AT1G17890/AT3G24090/AT3G51160/AT5G44480/AT3G29360/AT5G50750/AT2G39770/AT2G34850/AT3G08900/AT5G15650/AT3G02570
GO:0008509	anion transmembrane transporter activity	238	-0.278701	-1.09457	0.24698	0.75742	3176	tags=20%, list=16%, signal=17%	AT3G20660/AT5G36940/AT3G51870/AT1G80510/AT1G69870/AT1G14560/AT3G57280/AT4G19030/AT5G61730/AT5G50200/AT3G13050/AT1G71890/AT5G63850/AT1G12600/AT5G07320/AT5G56450/AT3G11680/AT4G35180/AT5G48970/AT4G27720/AT1G73020/AT3G01550/AT5G40890/AT4G23010/AT3G47960/AT5G15240/AT4G17970/AT4G25010/AT1G12110/AT1G08090/AT5G02170/AT4G31600/AT5G27520/AT3G56200/AT1G61800/AT2G36590/AT2G39130/AT4G21680/AT5G09470/AT5G41800…
GO:0004089	carbonate dehydratase activity	13	0.472141	1.17855	0.247727	0.758999	418	tags=15%, list=2%, signal=15%	AT1G23730/AT1G08080
GO:0090502	RNA phosphodiester bond hydrolysis, endonucleolytic	21	0.415582	1.17361	0.24826	0.759615	6361	tags=48%, list=31%, signal=33%	AT3G09160/AT1G24450/AT1G06720/AT5G51730/AT5G59980/AT3G16260/AT3G04770/AT1G09700/AT5G22100/AT5G27700
GO:0009956	radial pattern formation	10	0.50297	1.19211	0.248394	0.759615	4687	tags=70%, list=23%, signal=54%	AT1G16510/AT4G31400/AT5G46700/AT5G60690/AT4G37650/AT3G54220/AT5G55540
GO:0016709	oxidoreductase activity, acting on paired donors, with incorporation or reduction of molecular oxygen, NAD(P)H as one donor, and incorporation of one atom of oxygen	143	0.264497	1.07916	0.24918	0.760606	4240	tags=33%, list=21%, signal=26%	AT3G10560/AT3G61880/AT5G04660/AT5G45340/AT1G74550/AT4G37310/AT3G13730/AT2G42250/AT4G37370/AT4G37320/AT3G03470/AT4G12300/AT3G26280/AT1G13080/AT3G26180/AT4G36380/AT5G24155/AT1G64900/AT3G26330/AT3G20100/AT4G12110/AT3G26830/AT1G01280/AT1G62620/AT3G26290/AT3G48310/AT1G12200/AT4G22756/AT4G22710/AT4G13290/AT4G37330/AT1G50560/AT3G20120/AT3G53280/AT4G22690/AT1G13090/AT2G12190/AT5G25130/AT2G32440/AT3G48320…
GO:0009707	chloroplast outer membrane	51	0.326918	1.1355	0.249357	0.760606	4643	tags=33%, list=23%, signal=26%	AT4G15810/AT1G11070/AT1G62510/AT1G07120/AT4G02482/AT2G16640/AT3G06510/AT4G36650/AT2G11810/AT4G12470/AT1G52080/AT1G03160/AT2G44640/AT4G02510/AT4G18570/AT5G19620/AT4G27440
GO:0010143	cutin biosynthetic process	19	0.425147	1.15856	0.249417	0.760606	189	tags=11%, list=1%, signal=10%	AT3G10560/AT5G04660
GO:0016620	oxidoreductase activity, acting on the aldehyde or oxo group of donors, NAD or NADP as acceptor	48	-0.375214	-1.17206	0.25	0.761671	5828	tags=44%, list=29%, signal=31%	AT1G42970/AT1G74920/AT5G14780/AT1G14810/AT4G30470/AT2G33590/AT1G04580/AT2G36680/AT4G33790/AT2G19940/AT1G80820/AT1G23800/AT1G79440/AT1G76470/AT1G09500/AT1G09940/AT4G34240/AT3G44550/AT3G56700/AT5G22500
GO:0060969	negative regulation of gene silencing	16	0.450302	1.18004	0.250575	0.76271	6885	tags=62%, list=34%, signal=41%	AT5G11470/AT5G64910/AT3G15120/AT3G63270/AT1G75660/AT2G06990/AT5G42540/AT1G05910/AT4G00990/AT5G10010
GO:1902456	regulation of stomatal opening	12	-0.522786	-1.20479	0.251337	0.764035	4701	tags=50%, list=23%, signal=38%	AT1G05100/AT4G33950/AT2G17290/AT2G28930/AT5G22920
GO:0005516	calmodulin binding	207	-0.282541	-1.09956	0.251701	0.764035	4217	tags=29%, list=21%, signal=24%	AT5G03040/AT4G37640/AT1G61360/AT1G18150/AT1G61380/AT4G04700/AT1G08730/AT5G13460/AT2G24610/AT3G25230/AT2G38540/AT5G48570/AT5G44610/AT4G35310/AT1G13870/AT1G11280/AT5G57110/AT2G33240/AT1G61550/AT1G12060/AT1G18890/AT2G28260/AT1G11000/AT1G04600/AT2G17290/AT1G08650/AT1G11330/AT5G63160/AT1G64105/AT5G53760/AT4G29900/AT5G24080/AT5G24430/AT1G27460/AT4G02600/AT5G57940/AT5G43900/AT4G32300/AT4G23650/AT2G30590…
GO:0042147	retrograde transport, endosome to Golgi	33	-0.404955	-1.17802	0.251712	0.764035	6019	tags=58%, list=30%, signal=41%	AT3G29100/AT5G53530/AT1G50970/AT4G33240/AT1G50500/AT2G20320/AT4G39890/AT3G47810/AT5G39510/AT5G50440/AT5G52210/AT3G14270/AT3G17440/AT1G34260/AT5G67290/AT5G64990/AT5G10260/AT3G02460
GO:0071712	ER-associated misfolded protein catabolic process	12	-0.520632	-1.19983	0.253119	0.767592	1236	tags=25%, list=6%, signal=23%	AT1G19310/AT4G03510
GO:0006022	aminoglycan metabolic process	23	-0.4362	-1.17852	0.253886	0.769202	2573	tags=39%, list=13%, signal=34%	AT3G29360/AT1G02360/AT4G19720/AT2G43570/AT4G19820/AT2G43610/AT2G43620/AT4G19810
GO:0098800	inner mitochondrial membrane protein complex	101	-0.31284	-1.11059	0.254186	0.769395	7149	tags=42%, list=35%, signal=27%	AT2G20360/AT1G27390/AT2G46505/AT1G47420/AT1G16700/AT1G79010/AT1G51650/AT5G62575/AT4G26780/AT4G34700/AT5G67590/AT4G32470/AT2G21870/AT2G33040/AT1G08480/AT3G27240/AT2G07671/AT2G02510/AT1G51980/AT3G59280/ATMG01080/AT2G33220/AT4G28510/AT1G20350/AT3G15640/AT3G02090/AT2G20530/AT5G66760/AT4G37830/AT5G13440/AT1G04630/AT2G28900/AT1G52710/AT5G40650/AT5G13450/AT1G72750/AT3G52300/AT1G19580/AT2G27730/AT5G67490…
GO:0010647	positive regulation of cell communication	91	-0.317414	-1.11134	0.254962	0.770488	4532	tags=33%, list=22%, signal=26%	AT5G12980/AT1G70810/AT2G04450/AT1G51940/AT1G55830/AT2G47410/AT1G70800/AT3G15730/AT5G37740/AT5G53000/AT1G05100/AT3G54030/AT4G33950/AT1G52400/AT2G32550/AT3G57120/AT3G63010/AT5G41790/AT4G03110/AT3G17980/AT2G01540/AT1G70790/AT5G65160/AT1G35670/AT1G15100/AT5G46590/AT2G01150/AT5G20150/AT5G12050
GO:0052866	phosphatidylinositol phosphate phosphatase activity	18	0.431863	1.15539	0.255125	0.770488	4510	tags=33%, list=22%, signal=26%	AT2G32010/AT1G05470/AT1G22620/AT2G35680/AT1G65580/AT3G10550
GO:0051240	positive regulation of multicellular organismal process	118	-0.304177	-1.1036	0.255255	0.770488	2466	tags=24%, list=12%, signal=21%	AT4G28000/AT3G48990/AT1G77620/AT5G62000/AT1G05100/AT1G69935/AT1G13710/AT4G35730/AT4G35900/AT1G65480/AT1G07240/AT3G62420/AT4G19720/AT5G57390/AT4G39070/AT1G18100/AT3G21320/AT2G45210/AT1G64110/AT1G77450/AT5G09890/AT4G34530/AT1G75220/AT3G59900/AT4G22620/AT5G52882/AT4G12410
GO:0051235	maintenance of location	52	0.323769	1.11999	0.255937	0.771428	2173	tags=19%, list=11%, signal=17%	AT1G05510/AT1G76800/AT3G27660/AT4G29340/AT4G25140/AT5G07600/AT5G07520/AT4G18550/AT5G40420/AT1G21140
GO:0001671	ATPase activator activity	10	-0.550096	-1.19699	0.256075	0.771428	4459	tags=50%, list=22%, signal=39%	AT3G08910/AT3G47940/AT4G28480/AT2G20560
GO:0090501	RNA phosphodiester bond hydrolysis	48	0.333761	1.13555	0.256477	0.771428	7133	tags=46%, list=35%, signal=30%	AT3G09160/AT1G24450/AT1G06720/AT5G51730/AT3G66652/AT4G04885/AT5G59980/AT3G25940/AT3G16260/AT5G13480/AT2G25355/AT3G04770/AT1G09700/AT3G12990/AT1G01210/AT5G22100/AT5G27700/AT5G08180/AT1G12650/AT4G20910/AT3G60500/AT1G60080
GO:0010101	post-embryonic root morphogenesis	17	-0.4638	-1.16198	0.257042	0.771428	3662	tags=41%, list=18%, signal=34%	AT1G02410/AT2G04160/AT1G06440/AT5G45790/AT4G12550/AT3G18485
GO:0051276	chromosome organization	130	0.270051	1.08916	0.257576	0.771428	7650	tags=53%, list=38%, signal=33%	AT4G36020/AT1G17460/AT5G59430/AT3G46590/AT1G01690/AT4G31400/AT2G24250/AT4G02070/AT3G24320/AT5G48600/AT5G15920/AT1G59660/AT3G18524/AT2G32590/AT1G67630/AT1G08060/AT5G40820/AT3G59550/AT2G20490/AT2G07690/AT1G44900/AT1G10930/AT3G49650/AT5G04130/AT4G00060/AT1G28260/AT4G02060/AT4G32200/AT5G16940/AT1G80670/AT5G44635/AT3G14120/AT2G17036/AT3G54670/AT3G23890/AT4G09550/AT5G41880/AT4G21520/AT2G16440/AT2G19560…
GO:0000079	regulation of cyclin-dependent protein serine/threonine kinase activity	29	0.382695	1.16437	0.257611	0.771428	2635	tags=21%, list=13%, signal=18%	AT3G60550/AT3G50630/AT2G45080/AT3G21870/AT2G32710/AT2G23430
GO:1904029	regulation of cyclin-dependent protein kinase activity	29	0.382695	1.16437	0.257611	0.771428	2635	tags=21%, list=13%, signal=18%	AT3G60550/AT3G50630/AT2G45080/AT3G21870/AT2G32710/AT2G23430
GO:0016833	oxo-acid-lyase activity	15	0.455088	1.17891	0.257919	0.771428	5620	tags=40%, list=28%, signal=29%	AT3G21720/AT3G02770/AT2G43180/AT1G24807/AT1G75200/AT1G60550
GO:0006515	protein quality control for misfolded or incompletely synthesized proteins	19	-0.450228	-1.16047	0.25829	0.771428	2387	tags=26%, list=12%, signal=23%	AT2G42030/AT3G09350/AT1G19310/AT4G03510
GO:0010118	stomatal movement	33	-0.403019	-1.17239	0.258562	0.771428	5719	tags=52%, list=28%, signal=37%	AT2G33380/AT1G74710/AT2G31870/AT5G46860/AT2G39050/AT1G30270/AT3G58490/AT3G56960/AT1G09780/AT3G14270/AT4G32150/AT5G02500/AT4G33950/AT1G08860/AT4G20260/AT4G17970
GO:0016790	thiolester hydrolase activity	33	-0.401927	-1.16922	0.258562	0.771428	4933	tags=42%, list=24%, signal=32%	AT1G68260/AT1G06130/AT1G08510/AT2G31350/AT4G13050/AT3G15650/AT4G22305/AT4G17480/AT3G54950/AT2G43430/AT2G30720/AT5G47330/AT4G17470
GO:0005096	GTPase activator activity	69	-0.343743	-1.13534	0.259027	0.771428	4424	tags=28%, list=22%, signal=22%	AT5G46750/AT1G70800/AT3G15730/AT5G37740/AT2G37550/AT5G50550/AT3G17660/AT5G15930/AT3G17980/AT2G01540/AT3G07890/AT5G52580/AT1G70790/AT3G02460/AT4G28550/AT5G61980/AT4G13350/AT4G27100
GO:0004497	monooxygenase activity	219	0.252288	1.08048	0.259124	0.771428	2463	tags=19%, list=12%, signal=17%	AT4G15310/AT3G10560/AT3G61880/AT1G65670/AT5G55240/AT5G04660/AT5G05320/AT5G45340/AT4G26740/AT1G74550/AT4G37310/AT3G13730/AT2G42250/AT4G37370/AT4G37320/AT2G26710/AT3G03470/AT4G12300/AT3G26280/AT1G13080/AT3G26180/AT5G05690/AT4G36380/AT5G24155/AT1G69500/AT1G64900/AT3G26330/AT4G15393/AT3G20100/AT4G12110/AT1G57750/AT3G26830/AT1G01280/AT1G62620/AT3G26290/AT3G48310/AT1G13140/AT1G12200/AT4G22756/AT2G26170…
GO:0019747	regulation of isoprenoid metabolic process	28	-0.409022	-1.14911	0.259582	0.771428	4141	tags=36%, list=20%, signal=28%	AT1G64670/AT5G07350/AT1G68320/AT3G26790/AT1G63030/AT1G20780/AT1G12610/AT1G54540/AT5G61780
GO:0044550	secondary metabolite biosynthetic process	248	-0.27565	-1.08665	0.259603	0.771428	4122	tags=31%, list=20%, signal=25%	AT5G25140/AT1G24100/AT4G31970/AT5G13580/AT1G64670/AT5G43780/AT4G20240/AT1G62560/AT1G80820/AT2G45560/AT2G25450/AT2G45580/AT2G37040/AT4G23100/AT4G34850/AT2G36880/AT1G16400/AT1G50520/AT4G39940/AT1G13710/AT2G39410/AT4G34230/AT1G61820/AT2G29720/AT1G01190/AT4G31500/AT1G16410/AT2G23190/AT3G62160/AT1G76470/AT1G09500/AT2G22330/AT3G19710/AT4G13310/AT4G31950/AT5G66390/AT2G14750/AT5G36220/AT5G41040/AT4G14680…
GO:0009522	photosystem I	29	0.38227	1.16307	0.259953	0.771428	5962	tags=38%, list=29%, signal=27%	AT2G34420/AT2G05070/AT5G54270/AT1G29920/AT1G19150/AT3G08940/AT1G29910/AT1G61520/AT4G10340/AT3G47470/AT3G27690
GO:0009933	meristem structural organization	15	0.452258	1.17158	0.260181	0.771428	6449	tags=60%, list=32%, signal=41%	AT2G35350/AT5G64630/AT5G46700/AT5G55540/AT2G45190/AT3G44600/AT4G29040/AT1G69120/AT5G16780
GO:0019900	kinase binding	77	0.300458	1.11366	0.260388	0.771428	2075	tags=17%, list=10%, signal=15%	AT3G60550/AT3G25250/AT2G01830/AT4G27160/AT5G03640/AT2G45080/AT1G79030/AT4G26080/AT2G36350/AT2G20470/AT3G21870/AT5G13290/AT1G27320
GO:0010224	response to UV-B	72	0.307091	1.12204	0.26087	0.771428	1942	tags=17%, list=10%, signal=15%	AT5G54470/AT1G19320/AT5G26920/AT5G59820/AT2G27420/AT1G73805/AT3G45640/AT2G42690/AT5G05690/AT5G03240/AT2G47460/AT3G55580
GO:0051960	regulation of nervous system development	18	-0.456656	-1.1576	0.261101	0.771428	1238	tags=44%, list=6%, signal=42%	AT2G20320/AT4G29440/AT4G28000/AT4G35730/AT1G64110/AT5G09890/AT5G52882
GO:0006998	nuclear envelope organization	11	-0.536636	-1.19909	0.261111	0.771428	2978	tags=45%, list=15%, signal=39%	AT3G21660/AT4G15410/AT1G64110/AT5G52882
GO:0031468	nuclear envelope reassembly	11	-0.536636	-1.19909	0.261111	0.771428	2978	tags=45%, list=15%, signal=39%	AT3G21660/AT4G15410/AT1G64110/AT5G52882
GO:0009055	electron transfer activity	118	-0.303528	-1.10125	0.261261	0.771428	6253	tags=46%, list=31%, signal=32%	AT3G15660/AT1G32550/AT4G15670/AT3G62930/AT2G02850/AT3G27240/AT2G04700/AT2G27510/AT3G24170/AT1G06830/AT5G42150/AT2G20270/AT3G15640/ATCG00680/AT5G05370/AT3G01440/ATCG00280/AT5G66760/AT4G37830/AT5G13440/AT1G04580/AT5G63030/ATCG00270/ATCG00020/ATMG00160/AT1G22840/AT2G30540/AT1G77370/AT1G76100/AT1G52710/AT5G06470/AT2G47880/AT3G27380/AT5G40650/AT2G48130/AT5G40370/AT4G10040/AT5G18600/AT4G32590/AT2G01918…
GO:0046885	regulation of hormone biosynthetic process	38	-0.386981	-1.15514	0.261824	0.771428	3283	tags=37%, list=16%, signal=31%	AT5G07350/AT2G45400/AT1G68320/AT1G25250/AT5G05730/AT3G59060/AT4G15400/AT3G26790/AT1G63030/AT1G12610/AT3G04070/AT4G28720/AT5G61780
GO:0044087	regulation of cellular component biogenesis	125	0.272699	1.08668	0.262195	0.771428	3175	tags=19%, list=16%, signal=16%	AT4G33450/AT5G50650/AT4G29340/AT1G79180/AT1G29170/AT5G16600/AT4G28500/AT1G17950/AT1G28470/AT2G31300/AT4G04920/AT3G21700/AT5G57320/AT5G07780/AT5G12870/AT1G66810/AT5G06680/AT1G09100/AT2G46980/AT2G14825/AT1G03830/AT2G33385/AT5G49660/AT1G62990
GO:1990351	transporter complex	15	-0.488626	-1.18675	0.2625	0.771428	2850	tags=33%, list=14%, signal=29%	AT4G08960/AT1G73020/AT5G40890/AT3G27170
GO:0046034	ATP metabolic process	111	-0.306657	-1.10038	0.262687	0.771428	7060	tags=39%, list=35%, signal=25%	AT4G29220/AT2G29560/AT1G54220/AT2G21410/AT1G56190/AT1G34430/AT1G51650/AT4G39080/AT1G78900/AT3G30841/AT2G33040/AT2G01140/AT3G27240/AT1G79530/AT2G07671/ATMG01080/AT3G13930/AT3G42640/AT2G07741/AT1G20260/AT2G34590/ATMG01170/AT3G15640/AT1G16820/AT1G09780/AT2G07698/AT5G42740/ATCG00470/AT5G03690/AT1G52710/AT3G47950/AT3G55410/AT5G13450/ATCG00480/ATCG00130/AT3G55440/AT1G78050/AT3G52300/AT3G60330/AT3G20040…
GO:0009746	response to hexose	47	-0.368887	-1.14729	0.263072	0.771428	5360	tags=36%, list=26%, signal=27%	AT2G35050/AT1G65220/AT5G03730/AT1G04700/AT2G28900/AT5G57610/AT5G57090/AT4G37220/AT5G28770/AT3G49340/AT4G18300/AT5G45890/AT4G22970/AT1G61800/AT3G16690/AT5G64750
GO:0004970	ionotropic glutamate receptor activity	16	0.441632	1.15732	0.264368	0.771428	3924	tags=50%, list=19%, signal=40%	AT4G35290/AT2G29100/AT1G05200/AT3G51480/AT2G29110/AT5G48400/AT2G17260/AT5G48410
GO:0005230	extracellular ligand-gated ion channel activity	16	0.441632	1.15732	0.264368	0.771428	3924	tags=50%, list=19%, signal=40%	AT4G35290/AT2G29100/AT1G05200/AT3G51480/AT2G29110/AT5G48400/AT2G17260/AT5G48410
GO:0008066	glutamate receptor activity	16	0.441632	1.15732	0.264368	0.771428	3924	tags=50%, list=19%, signal=40%	AT4G35290/AT2G29100/AT1G05200/AT3G51480/AT2G29110/AT5G48400/AT2G17260/AT5G48410
GO:0022824	transmitter-gated ion channel activity	16	0.441632	1.15732	0.264368	0.771428	3924	tags=50%, list=19%, signal=40%	AT4G35290/AT2G29100/AT1G05200/AT3G51480/AT2G29110/AT5G48400/AT2G17260/AT5G48410
GO:0022835	transmitter-gated channel activity	16	0.441632	1.15732	0.264368	0.771428	3924	tags=50%, list=19%, signal=40%	AT4G35290/AT2G29100/AT1G05200/AT3G51480/AT2G29110/AT5G48400/AT2G17260/AT5G48410
GO:0030594	neurotransmitter receptor activity	16	0.441632	1.15732	0.264368	0.771428	3924	tags=50%, list=19%, signal=40%	AT4G35290/AT2G29100/AT1G05200/AT3G51480/AT2G29110/AT5G48400/AT2G17260/AT5G48410
GO:0071901	negative regulation of protein serine/threonine kinase activity	16	0.441869	1.15794	0.264368	0.771428	2635	tags=31%, list=13%, signal=27%	AT3G50630/AT2G20470/AT5G63190/AT2G32710/AT2G23430
GO:0033177	proton-transporting two-sector ATPase complex, proton-transporting domain	26	-0.413238	-1.15011	0.264505	0.771428	7425	tags=65%, list=37%, signal=42%	AT4G38920/ATCG00150/AT2G16510/AT5G55290/AT2G21410/AT4G26710/AT4G39080/AT3G28710/AT2G21870/AT3G28715/AT2G07671/ATMG01080/AT2G07741/ATMG01170/AT1G19910/ATCG00130
GO:0010102	lateral root morphogenesis	16	-0.476838	-1.17305	0.26455	0.771428	1217	tags=38%, list=6%, signal=35%	AT2G04160/AT1G06440/AT5G45790/AT4G12550/AT3G18485
GO:0045828	positive regulation of isoprenoid metabolic process	16	-0.476401	-1.17197	0.26455	0.771428	388	tags=25%, list=2%, signal=25%	AT3G26790/AT1G54540/AT5G61780
GO:0045931	positive regulation of mitotic cell cycle	17	0.435078	1.14804	0.264977	0.771982	5088	tags=35%, list=25%, signal=26%	AT5G49430/AT3G21700/AT3G15150/AT3G25100/AT3G05870/AT5G54840
GO:0009931	calcium-dependent protein serine/threonine kinase activity	39	-0.383534	-1.14759	0.265546	0.772261	3266	tags=38%, list=16%, signal=32%	AT5G04870/AT1G74740/AT4G04700/AT4G35310/AT1G18890/AT4G33950/AT2G17290/AT1G08650/AT5G24430/AT4G23650/AT4G21940/AT3G10660/AT1G12680/AT1G35670
GO:0010857	calcium-dependent protein kinase activity	39	-0.383534	-1.14759	0.265546	0.772261	3266	tags=38%, list=16%, signal=32%	AT5G04870/AT1G74740/AT4G04700/AT4G35310/AT1G18890/AT4G33950/AT2G17290/AT1G08650/AT5G24430/AT4G23650/AT4G21940/AT3G10660/AT1G12680/AT1G35670
GO:0001046	core promoter sequence-specific DNA binding	27	0.383415	1.14173	0.265882	0.77255	1899	tags=30%, list=9%, signal=27%	AT2G20100/AT1G31050/AT5G16600/AT1G51140/AT4G29100/AT4G39410/AT3G19500/AT1G27660
GO:0010369	chromocenter	16	0.440247	1.15369	0.266667	0.773739	3172	tags=25%, list=16%, signal=21%	AT5G64910/AT1G13448/AT3G46580/AT5G65780
GO:0001708	cell fate specification	21	0.409398	1.15615	0.266821	0.773739	2516	tags=24%, list=12%, signal=21%	AT1G63650/AT5G60450/AT4G08150/AT1G55350/AT5G41920
GO:0042537	benzene-containing compound metabolic process	37	-0.387122	-1.15468	0.267227	0.773739	2078	tags=35%, list=10%, signal=32%	AT1G02860/AT2G37040/AT2G23620/AT3G53260/AT1G18870/AT1G64160/AT5G24530/AT4G10500/AT3G55840/AT4G39030/AT2G23580/AT4G10490
GO:1900150	regulation of defense response to fungus	53	0.320476	1.1198	0.267352	0.773739	3802	tags=28%, list=19%, signal=23%	AT4G14390/AT3G24900/AT1G47890/AT2G33020/AT4G14400/AT4G13810/AT4G03450/AT4G03500/AT3G56410/AT3G01310/AT4G13880/AT4G05040/AT3G11080/AT4G13820/AT3G24982
GO:1990204	oxidoreductase complex	104	-0.307463	-1.09649	0.267477	0.773739	8637	tags=61%, list=43%, signal=35%	AT5G40770/AT5G52840/AT1G79040/AT4G02580/AT5G47570/AT3G03100/AT5G11450/AT5G11770/AT3G52730/AT5G13430/AT1G47260/AT1G14450/AT3G56650/AT3G12260/AT2G35370/AT2G42210/AT5G08530/AT3G63540/AT3G52200/AT5G37510/AT3G03070/AT3G55330/AT1G14150/AT3G07690/AT4G28660/AT3G17240/AT2G20360/AT2G46505/AT1G54220/AT1G47420/AT1G16700/AT1G76450/AT1G79010/AT5G62575/AT5G40610/AT4G34700/AT5G67590/AT3G23580/AT4G32470/AT1G08480…
GO:0098573	intrinsic component of mitochondrial membrane	30	-0.401943	-1.14542	0.268503	0.774776	5647	tags=47%, list=28%, signal=34%	AT4G14695/AT1G20350/AT1G53760/AT4G05590/AT2G28900/AT1G02410/AT5G15640/AT1G72750/AT1G04070/AT5G48970/AT3G20040/AT1G06530/AT1G50460
GO:0031123	RNA 3'-end processing	61	0.31198	1.11059	0.269634	0.774776	7133	tags=46%, list=35%, signal=30%	AT5G23690/AT3G48830/AT3G57150/AT4G25630/AT1G22660/AT3G66652/AT2G33435/AT4G04885/AT4G29820/AT3G16260/AT5G13480/AT1G28090/AT2G25355/AT1G59760/AT2G45620/AT3G04770/AT3G46210/AT5G51170/AT5G39840/AT1G30460/AT3G12990/AT5G02670/AT5G27700/AT5G01400/AT2G39740/AT3G60500/AT4G12640/AT1G60080
GO:0010970	transport along microtubule	11	-0.532161	-1.18909	0.27037	0.774776	1238	tags=27%, list=6%, signal=26%	AT1G64110/AT5G52882
GO:0090481	pyrimidine nucleotide-sugar transmembrane transport	11	-0.531092	-1.1867	0.27037	0.774776	3411	tags=36%, list=17%, signal=30%	AT1G76670/AT4G23010/AT4G31600
GO:0099111	microtubule-based transport	11	-0.532161	-1.18909	0.27037	0.774776	1238	tags=27%, list=6%, signal=26%	AT1G64110/AT5G52882
GO:0042168	heme metabolic process	19	0.420765	1.14662	0.270396	0.774776	4278	tags=32%, list=21%, signal=25%	AT1G58300/AT2G20180/AT5G56090/AT5G26030/AT1G50170/AT2G26550
GO:0046164	alcohol catabolic process	20	-0.448078	-1.15633	0.270463	0.774776	2877	tags=30%, list=14%, signal=26%	AT3G55440/AT4G18010/AT3G21780/AT1G14520/AT2G19800
GO:1902652	secondary alcohol metabolic process	20	-0.446818	-1.15308	0.270463	0.774776	6440	tags=60%, list=32%, signal=41%	AT1G65930/AT1G54340/AT2G05710/AT4G35260/AT4G01510/AT4G26970/AT5G03290/AT1G50430/AT4G34640/AT4G34650/AT1G42470
GO:0032436	positive regulation of proteasomal ubiquitin-dependent protein catabolic process	11	0.481752	1.15573	0.270563	0.774776	4097	tags=36%, list=20%, signal=29%	AT5G18650/AT2G16090/AT1G05890/AT2G31510
GO:1901800	positive regulation of proteasomal protein catabolic process	11	0.481752	1.15573	0.270563	0.774776	4097	tags=36%, list=20%, signal=29%	AT5G18650/AT2G16090/AT1G05890/AT2G31510
GO:0035091	phosphatidylinositol binding	64	-0.345451	-1.11891	0.270968	0.774776	4324	tags=31%, list=21%, signal=25%	AT2G29700/AT4G32160/AT5G55910/AT2G28320/AT3G15730/AT1G53320/AT1G76900/AT3G62770/AT5G44610/AT2G25350/AT3G16785/AT3G56440/AT1G25240/AT2G40810/AT4G20260/AT2G42010/AT2G25430/AT4G14368/AT1G05020
GO:0009900	dehiscence	18	0.426219	1.14028	0.271071	0.774776	3446	tags=39%, list=17%, signal=32%	AT1G32770/AT2G41850/AT2G46770/AT3G57510/AT3G07970/AT1G72520/AT5G67110
GO:0031344	regulation of cell projection organization	21	-0.440885	-1.15908	0.271454	0.774776	2016	tags=43%, list=10%, signal=39%	AT2G20320/AT4G29440/AT4G28000/AT4G35730/AT5G15930/AT1G64110/AT5G09890/AT5G52882
GO:0120035	regulation of plasma membrane bounded cell projection organization	21	-0.440885	-1.15908	0.271454	0.774776	2016	tags=43%, list=10%, signal=39%	AT2G20320/AT4G29440/AT4G28000/AT4G35730/AT5G15930/AT1G64110/AT5G09890/AT5G52882
GO:0010154	fruit development	25	0.38919	1.12952	0.271635	0.774776	5582	tags=48%, list=27%, signal=35%	AT3G61880/AT5G20450/AT4G31160/AT5G02030/AT4G36930/AT4G36890/AT5G60910/AT5G40010/AT2G45190/AT4G09140/AT1G14720/AT1G17580
GO:0043200	response to amino acid	25	0.388711	1.12813	0.271635	0.774776	3924	tags=44%, list=19%, signal=36%	AT4G35290/AT2G29100/AT1G05200/AT5G66400/AT5G46050/AT3G51480/AT2G29110/AT5G48400/AT4G08480/AT2G17260/AT5G48410
GO:0018958	phenol-containing compound metabolic process	30	-0.400936	-1.14255	0.271945	0.774984	1984	tags=40%, list=10%, signal=36%	AT1G02860/AT2G37040/AT2G23620/AT1G18870/AT5G48100/AT1G64160/AT5G24530/AT4G10500/AT4G39030/AT2G23580/AT4G10490
GO:0031072	heat shock protein binding	40	-0.378402	-1.13557	0.27242	0.775659	4719	tags=52%, list=23%, signal=40%	AT1G10350/AT5G51700/AT4G39960/AT3G04710/AT2G22360/AT1G80030/AT5G49580/AT5G23590/AT2G05230/AT2G05250/AT4G10130/AT5G22060/AT1G44160/AT3G47940/AT1G62740/AT5G64360/AT4G28480/AT4G35987/AT4G12400/AT1G72416
GO:0010319	stromule	34	-0.392837	-1.15032	0.272727	0.775767	3490	tags=59%, list=17%, signal=49%	AT3G63140/AT1G23190/AT4G35090/AT3G12780/ATCG00120/AT1G16880/AT1G03680/AT5G51820/AT1G70730/AT3G47520/AT5G04590/AT1G42970/AT4G04020/AT1G67280/AT1G26340/AT3G54050/ATCG00480/AT2G47730/AT3G25770
GO:0006520	cellular amino acid metabolic process	373	-0.260488	-1.06374	0.272953	0.775767	6107	tags=32%, list=30%, signal=23%	AT3G10050/AT1G28350/AT1G48470/AT3G01120/AT5G22630/AT1G66200/AT2G43090/AT4G14710/AT5G52520/AT4G19710/AT1G08630/AT5G23020/AT5G55810/AT3G28760/AT1G10070/AT5G62530/AT4G13890/AT2G16570/AT1G25350/AT1G15710/AT4G24830/AT4G34180/AT3G44720/AT1G18500/AT1G14810/AT3G54640/AT5G60540/AT2G21940/AT3G11710/AT5G53850/AT4G02120/AT3G49680/AT5G11520/AT2G20610/AT1G35580/AT4G39660/AT1G55775/AT3G26115/AT3G59760/AT4G12030…
GO:0016893	endonuclease activity, active with either ribo- or deoxyribonucleic acids and producing 5'-phosphomonoesters	36	0.348892	1.11944	0.273171	0.775767	4901	tags=36%, list=24%, signal=27%	AT1G24090/AT3G20420/AT5G51080/AT4G31150/AT1G24450/AT3G13740/AT5G59980/AT2G16650/AT3G16260/AT4G21900/AT3G05210/AT1G11190/AT2G25100
GO:0001047	core promoter binding	31	0.369431	1.14289	0.274038	0.77635	3167	tags=35%, list=16%, signal=30%	AT2G20100/AT1G31050/AT5G16600/AT1G51140/AT4G29100/AT4G39410/AT3G19500/AT1G27660/AT4G30980/AT2G14825/AT5G64980
GO:0005742	mitochondrial outer membrane translocase complex	10	0.487988	1.15661	0.27409	0.77635	271	tags=10%, list=1%, signal=10%	AT3G27070
GO:0016973	poly(A)+ mRNA export from nucleus	10	0.489071	1.15917	0.27409	0.77635	5750	tags=50%, list=28%, signal=36%	AT3G10650/AT1G13120/AT1G79280/AT3G57350/AT2G19560
GO:0003682	chromatin binding	124	0.267976	1.07068	0.274627	0.777196	6895	tags=40%, list=34%, signal=27%	AT3G50870/AT2G18380/AT5G11470/AT5G25830/AT5G66320/AT5G61850/AT3G60530/AT5G56860/AT1G20720/AT3G55580/AT4G39100/AT2G32590/AT5G47140/AT3G44530/AT1G15790/AT5G04290/AT3G25100/AT3G59550/AT3G21175/AT2G07690/AT3G51080/AT3G15120/AT2G18790/AT5G63550/AT3G63270/AT2G16910/AT4G12620/AT3G11450/AT5G28390/AT1G03760/AT4G39380/AT3G54670/AT5G37055/AT4G36240/AT5G49160/AT3G44600/AT5G52800/AT2G45050/AT1G65440/AT1G57820…
GO:0018298	protein-chromophore linkage	51	0.320383	1.1128	0.275064	0.777539	6070	tags=37%, list=30%, signal=26%	AT2G34420/AT3G55580/AT4G16250/AT3G45780/AT2G05070/AT5G54270/AT2G18790/AT1G29920/AT1G19150/AT3G08940/AT1G29910/AT1G09570/AT1G61520/AT5G58140/AT4G10340/AT3G47470/AT1G04400/AT3G27690/AT5G57360
GO:0009982	pseudouridine synthase activity	18	0.425202	1.13757	0.275626	0.777539	6511	tags=61%, list=32%, signal=42%	AT1G56345/AT4G21770/AT3G57150/AT3G19440/AT5G35400/AT1G09800/AT3G06950/AT1G20410/AT1G20370/AT1G76050/AT5G51140
GO:0004402	histone acetyltransferase activity	28	0.378844	1.13905	0.275701	0.777539	3291	tags=29%, list=16%, signal=24%	AT5G36740/AT5G36670/AT1G55970/AT3G48360/AT1G05380/AT1G18335/AT5G09740/AT1G32750
GO:0061733	peptide-lysine-N-acetyltransferase activity	28	0.378844	1.13905	0.275701	0.777539	3291	tags=29%, list=16%, signal=24%	AT5G36740/AT5G36670/AT1G55970/AT3G48360/AT1G05380/AT1G18335/AT5G09740/AT1G32750
GO:0048580	regulation of post-embryonic development	315	0.234702	1.04764	0.276018	0.777696	3488	tags=21%, list=17%, signal=17%	AT3G21150/AT3G09870/AT4G15248/AT1G77110/AT1G60190/AT3G54720/AT5G51870/AT1G20823/AT2G35230/AT5G54470/AT2G01830/AT5G22290/AT3G50870/AT5G03680/AT1G06180/AT2G20180/AT1G66700/AT2G21320/AT1G42550/AT4G25530/AT2G42640/AT1G15570/AT3G07650/AT2G31650/AT1G20160/AT5G57520/AT5G05690/AT5G24860/AT4G34220/AT3G54770/AT1G07430/AT1G75820/AT5G06550/AT2G43820/AT2G40080/AT5G56860/AT4G04920/AT4G18550/AT5G13290/AT2G22540…
GO:0016879	ligase activity, forming carbon-nitrogen bonds	63	0.30533	1.0948	0.276486	0.777696	902	tags=8%, list=4%, signal=8%	AT4G27260/AT1G36180/AT4G37390/AT1G63680/AT5G54510
GO:0019932	second-messenger-mediated signaling	44	-0.371745	-1.1418	0.276873	0.777696	4279	tags=39%, list=21%, signal=31%	AT2G33775/AT3G04110/AT2G32400/AT3G23805/AT4G14010/AT4G17615/AT1G02900/AT4G13950/AT3G16570/AT5G11210/AT3G25170/AT2G29120/AT3G05490/AT4G14640/AT4G15800/AT5G15410
GO:0046323	glucose import	42	-0.371665	-1.13017	0.276949	0.777696	2395	tags=26%, list=12%, signal=23%	AT2G20780/AT1G08930/AT5G23270/AT3G19930/AT1G08890/AT3G05155/AT1G11260/AT1G19450/AT1G75220/AT4G36670
GO:1904659	glucose transmembrane transport	42	-0.371665	-1.13017	0.276949	0.777696	2395	tags=26%, list=12%, signal=23%	AT2G20780/AT1G08930/AT5G23270/AT3G19930/AT1G08890/AT3G05155/AT1G11260/AT1G19450/AT1G75220/AT4G36670
GO:0051273	beta-glucan metabolic process	81	0.291728	1.09686	0.277929	0.779369	2603	tags=28%, list=13%, signal=25%	AT1G64390/AT1G71380/AT2G13680/AT1G05850/AT1G02730/AT5G63250/AT5G63230/AT5G62710/AT2G21770/AT5G01360/AT5G44030/AT4G11050/AT2G32530/AT1G70710/AT4G23560/AT4G18780/AT1G55850/AT4G04970/AT4G39010/AT4G23990/AT3G14570/AT4G24000/AT5G17420
GO:0043244	regulation of protein complex disassembly	31	-0.398972	-1.14695	0.278157	0.779369	2813	tags=32%, list=14%, signal=28%	AT1G20260/AT3G51300/AT4G28000/AT4G13860/AT2G01330/AT3G25500/AT4G20260/AT1G64110/AT5G52882
GO:0004659	prenyltransferase activity	29	-0.403616	-1.13999	0.278261	0.779369	4616	tags=34%, list=23%, signal=27%	AT2G39550/AT2G44520/AT2G34630/AT4G34650/AT2G23410/AT3G14530/AT3G29430/AT4G36810/AT1G49530
GO:0090693	plant organ senescence	97	0.281129	1.07704	0.279883	0.78144	2612	tags=23%, list=13%, signal=20%	AT4G23810/AT4G25580/AT4G30520/AT1G69490/AT2G27420/AT3G21520/AT5G12080/AT5G44160/AT2G03740/AT1G20900/AT1G32450/AT3G10500/AT3G21420/AT1G73680/AT4G32940/AT5G03280/AT1G27320/AT3G14067/AT4G18425/AT3G52430/AT3G11340/AT2G43000
GO:0009809	lignin biosynthetic process	54	-0.358924	-1.13706	0.280449	0.78144	3457	tags=28%, list=17%, signal=23%	AT2G39410/AT4G34230/AT1G61820/AT3G62160/AT1G09500/AT5G66390/AT5G48100/AT1G77420/AT4G37990/AT5G48930/AT1G67980/AT5G05340/AT3G17390/AT4G01070
GO:0050145	nucleoside monophosphate kinase activity	19	-0.444584	-1.14592	0.280977	0.78144	6379	tags=37%, list=31%, signal=25%	AT2G39270/AT5G59440/AT5G47840/AT5G50370/AT3G57550/AT2G41880
GO:0004519	endonuclease activity	500	-0.25465	-1.06063	0.28125	0.78144	4240	tags=24%, list=21%, signal=19%	AT5G08310/AT1G22960/AT5G61800/AT1G13410/AT2G06000/AT3G46870/AT5G56310/AT2G17670/AT4G14190/AT1G30010/AT1G62260/AT1G07910/AT5G50990/AT4G32450/AT2G15980/AT1G05750/AT3G16010/AT3G29230/AT3G15140/AT4G18520/AT5G11310/AT3G04130/AT3G22470/AT1G07590/AT5G13270/AT1G11900/AT1G74700/AT5G06540/AT1G26900/AT1G68290/AT1G55630/AT5G27110/AT5G44820/AT5G14820/AT5G15300/AT1G06580/AT4G37510/AT1G13630/ATMG00520/AT2G40240…
GO:1903008	organelle disassembly	26	-0.410253	-1.1418	0.28157	0.78144	1252	tags=35%, list=6%, signal=33%	AT5G17290/AT4G28000/AT3G62770/AT3G56440/AT2G40810/AT1G64110/AT4G27650/AT5G52882
GO:0046540	U4/U6 x U5 tri-snRNP complex	24	0.39197	1.12803	0.281623	0.78144	8147	tags=62%, list=40%, signal=37%	AT4G20440/AT3G56790/AT2G41500/AT1G03330/AT1G21190/AT4G12600/AT3G05760/AT4G30330/AT5G16780/AT5G48870/AT5G44500/AT3G59810/AT3G62840/AT1G60170/AT1G03140
GO:0045664	regulation of neuron differentiation	17	-0.457887	-1.14716	0.28169	0.78144	1238	tags=47%, list=6%, signal=44%	AT2G20320/AT4G29440/AT4G28000/AT4G35730/AT1G64110/AT5G09890/AT5G52882
GO:0050767	regulation of neurogenesis	17	-0.457887	-1.14716	0.28169	0.78144	1238	tags=47%, list=6%, signal=44%	AT2G20320/AT4G29440/AT4G28000/AT4G35730/AT1G64110/AT5G09890/AT5G52882
GO:0045834	positive regulation of lipid metabolic process	29	-0.400906	-1.13234	0.281739	0.78144	2456	tags=17%, list=12%, signal=15%	AT3G26790/AT3G27785/AT1G54540/AT5G61780
GO:1900618	regulation of shoot system morphogenesis	19	0.416422	1.13479	0.282051	0.78144	1148	tags=21%, list=6%, signal=20%	AT3G18550/AT1G49010/AT5G13250/AT5G38200
GO:0016469	proton-transporting two-sector ATPase complex	15	-0.477958	-1.16084	0.282143	0.78144	6807	tags=67%, list=34%, signal=44%	AT1G51650/AT4G39080/AT3G28710/AT2G21870/AT2G33040/AT3G28715/AT4G23710/AT5G13450/AT3G52300
GO:0016125	sterol metabolic process	62	0.308717	1.09993	0.282322	0.78144	2383	tags=15%, list=12%, signal=13%	AT4G15310/AT1G65670/AT5G45340/AT3G13730/AT5G05690/AT4G36380/AT4G15393/AT4G12110/AT4G22756
GO:0016759	cellulose synthase activity	22	0.403057	1.14237	0.282353	0.78144	3038	tags=45%, list=15%, signal=39%	AT1G02730/AT2G21770/AT5G44030/AT2G32530/AT4G18780/AT1G55850/AT4G23990/AT4G24000/AT5G17420/AT2G32540
GO:0016760	cellulose synthase (UDP-forming) activity	22	0.403057	1.14237	0.282353	0.78144	3038	tags=45%, list=15%, signal=39%	AT1G02730/AT2G21770/AT5G44030/AT2G32530/AT4G18780/AT1G55850/AT4G23990/AT4G24000/AT5G17420/AT2G32540
GO:0031226	intrinsic component of plasma membrane	292	-0.268992	-1.07449	0.283333	0.782618	3586	tags=24%, list=18%, signal=20%	AT2G17120/AT2G26600/AT3G29810/AT5G44610/AT3G52640/AT4G23950/AT5G45380/AT5G57110/AT1G71880/AT5G60920/AT1G74790/AT4G03460/AT5G18290/AT2G28260/AT4G17340/AT4G19030/AT3G22600/AT5G18610/AT1G71890/AT1G61900/AT5G57920/AT4G35100/AT4G29900/AT5G57940/AT5G51480/AT4G26590/AT5G04310/AT2G29900/AT5G64740/AT2G42365/AT4G28365/AT3G07320/AT3G43720/AT3G57270/AT2G39010/AT3G19930/AT4G27520/AT2G32300/AT2G44790/AT1G01340…
GO:0045490	pectin catabolic process	73	0.299817	1.09691	0.283747	0.782618	1978	tags=18%, list=10%, signal=16%	AT4G22080/AT3G60730/AT4G13710/AT4G28490/AT3G59010/AT4G24780/AT1G67750/AT4G13210/AT5G63180/AT1G30350/AT5G04970/AT1G02810/AT2G36710
GO:0009799	specification of symmetry	13	0.457828	1.14282	0.284091	0.782618	3292	tags=46%, list=16%, signal=39%	AT3G10590/AT5G01200/AT2G38090/AT2G34260/AT5G60690/AT5G04760
GO:0000178	exosome (RNase complex)	18	-0.449899	-1.14047	0.284192	0.782618	205	tags=100%, list=1%, signal=99%	AT3G46210/AT5G39840/AT3G12990/AT3G60500/AT5G02250/AT1G60080/AT5G25080/AT5G35910/AT4G32175/AT1G03360/AT5G38890/AT3G61620/AT2G17510/AT3G07750/AT4G14790/AT4G27490/AT1G77680
GO:1905354	exoribonuclease complex	18	-0.449899	-1.14047	0.284192	0.782618	205	tags=100%, list=1%, signal=99%	AT3G46210/AT5G39840/AT3G12990/AT3G60500/AT5G02250/AT1G60080/AT5G25080/AT5G35910/AT4G32175/AT1G03360/AT5G38890/AT3G61620/AT2G17510/AT3G07750/AT4G14790/AT4G27490/AT1G77680
GO:0071949	FAD binding	19	-0.443584	-1.14335	0.284468	0.782618	5483	tags=53%, list=27%, signal=38%	AT3G24200/AT4G38540/AT4G15765/AT1G12370/AT2G29720/AT4G15760/AT4G16760/AT3G30775/AT5G38710
GO:0030030	cell projection organization	20	-0.440909	-1.13783	0.284698	0.782618	2523	tags=20%, list=12%, signal=18%	AT1G64110/AT5G09890/AT5G52882
GO:0045995	regulation of embryonic development	14	-0.485117	-1.16544	0.284698	0.782618	4166	tags=36%, list=21%, signal=28%	AT4G32551/AT5G57390/AT3G27785/AT3G13530
GO:2000113	negative regulation of cellular macromolecule biosynthetic process	243	0.244574	1.06028	0.285141	0.782781	3897	tags=25%, list=19%, signal=20%	AT1G61470/AT3G21150/AT1G02450/AT5G67450/AT5G06250/AT1G74660/AT1G27730/AT2G36026/AT5G22250/AT5G16600/AT1G79030/AT3G56400/AT3G19580/AT1G80840/AT1G04550/AT5G52830/AT3G44260/AT5G22240/AT2G35430/AT4G04180/AT4G13570/AT1G04020/AT2G33550/AT5G44180/AT2G22540/AT4G39100/AT5G02030/AT5G61330/AT2G37630/AT5G63190/AT3G15150/AT1G62300/AT1G66810/AT4G11660/AT5G04290/AT2G34720/AT1G08060/AT2G35160/AT4G14550/AT5G44280…
GO:0034472	snRNA 3'-end processing	12	0.461059	1.13288	0.285714	0.782781	8165	tags=58%, list=40%, signal=35%	AT2G25355/AT3G46210/AT5G51170/AT3G12990/AT3G60500/AT1G60080/AT4G32175
GO:0045839	negative regulation of mitotic nuclear division	12	0.462221	1.13573	0.285714	0.782781	2360	tags=25%, list=12%, signal=22%	AT1G13448/AT1G69400/AT1G49910
GO:0015711	organic anion transport	129	-0.294781	-1.08543	0.285926	0.782781	2914	tags=20%, list=14%, signal=17%	AT1G14560/AT3G57280/AT3G13050/AT5G63850/AT5G07320/AT4G35180/AT5G48970/AT3G01550/AT4G23010/AT1G22180/AT3G47960/AT5G15240/AT4G25010/AT5G02170/AT4G31600/AT5G27520/AT3G56200/AT1G61800/AT2G36590/AT2G38530/AT1G71960/AT2G39130/AT5G09470/AT5G41800/AT5G61810
GO:0006004	fucose metabolic process	41	-0.374939	-1.13207	0.285956	0.782781	3780	tags=29%, list=19%, signal=24%	AT1G38065/AT3G02250/AT1G20550/AT1G76270/AT1G52630/AT5G35570/AT1G22460/AT3G05320/AT2G20370/AT1G11990/AT5G65470
GO:0009735	response to cytokinin	163	-0.284289	-1.07777	0.286319	0.783117	2646	tags=15%, list=13%, signal=13%	AT5G32450/AT3G49340/ATCG00130/AT3G09260/AT3G55440/AT3G49120/AT1G66270/AT5G58070/AT3G01210/AT4G16110/AT1G07890/AT1G10470/AT5G45890/AT2G01530/AT1G78240/AT4G20260/AT4G39260/AT3G25880/AT4G26150/AT4G28720/AT4G16780/AT5G62920/AT4G37790
GO:0045597	positive regulation of cell differentiation	19	0.415505	1.13229	0.286713	0.783453	956	tags=26%, list=5%, signal=25%	AT2G46410/AT3G24140/AT2G19710/AT4G39410/AT4G32880
GO:0005615	extracellular space	99	0.279033	1.06896	0.286982	0.783453	1026	tags=7%, list=5%, signal=7%	AT2G01505/AT5G10130/AT1G02300/AT5G59305/AT2G27420/AT5G64770/AT1G19900
GO:0016854	racemase and epimerase activity	36	-0.385343	-1.1394	0.287162	0.783453	4528	tags=25%, list=22%, signal=19%	AT5G28840/AT4G25900/AT5G44480/AT4G30440/AT4G10960/AT2G34850/AT3G23820/AT4G23730
GO:0000776	kinetochore	23	0.397338	1.1363	0.288416	0.785505	7650	tags=61%, list=38%, signal=38%	AT1G13448/AT1G69400/AT1G49910/AT2G35630/AT5G16940/AT5G05970/AT4G09550/AT4G21270/AT1G58210/AT1G77720/AT1G01370/AT5G05510/AT2G33560/AT1G15660
GO:0044347	cell wall polysaccharide catabolic process	23	-0.419157	-1.13247	0.288428	0.785505	2174	tags=22%, list=11%, signal=19%	AT4G28320/AT4G33820/AT1G02310/AT2G14690
GO:0000177	cytoplasmic exosome (RNase complex)	13	0.454538	1.13461	0.288636	0.785505	8165	tags=54%, list=40%, signal=32%	AT2G25355/AT3G46210/AT5G39840/AT3G12990/AT3G60500/AT1G60080/AT4G32175
GO:1900055	regulation of leaf senescence	30	-0.39576	-1.1278	0.289157	0.785508	1289	tags=17%, list=6%, signal=16%	AT1G77450/AT5G02760/AT4G22620/AT4G12410
GO:0008028	monocarboxylic acid transmembrane transporter activity	22	-0.430961	-1.15188	0.289428	0.785508	2805	tags=27%, list=14%, signal=24%	AT5G61730/AT3G13050/AT1G71890/AT3G01550/AT1G61800
GO:0042277	peptide binding	56	-0.35661	-1.13763	0.290064	0.785508	4485	tags=39%, list=22%, signal=31%	AT3G06720/AT1G75760/AT5G42150/AT1G13900/AT1G17170/AT3G25160/AT2G26000/AT1G02920/AT1G09270/AT4G35450/AT2G21190/AT1G02930/AT5G19820/AT5G27380/AT4G02520/AT2G47730/AT2G30870/AT5G62600/AT1G29330/AT1G72180/AT2G29450
GO:0010965	regulation of mitotic sister chromatid separation	17	0.424374	1.11979	0.290323	0.785508	5173	tags=41%, list=25%, signal=31%	AT1G13448/AT1G69400/AT1G49910/AT3G48150/AT3G05870/AT4G21530/AT1G79280
GO:0030071	regulation of mitotic metaphase/anaphase transition	17	0.424374	1.11979	0.290323	0.785508	5173	tags=41%, list=25%, signal=31%	AT1G13448/AT1G69400/AT1G49910/AT3G48150/AT3G05870/AT4G21530/AT1G79280
GO:1902099	regulation of metaphase/anaphase transition of cell cycle	17	0.424374	1.11979	0.290323	0.785508	5173	tags=41%, list=25%, signal=31%	AT1G13448/AT1G69400/AT1G49910/AT3G48150/AT3G05870/AT4G21530/AT1G79280
GO:1905818	regulation of chromosome separation	17	0.424374	1.11979	0.290323	0.785508	5173	tags=41%, list=25%, signal=31%	AT1G13448/AT1G69400/AT1G49910/AT3G48150/AT3G05870/AT4G21530/AT1G79280
GO:0051225	spindle assembly	17	0.423412	1.11726	0.292627	0.788102	6438	tags=47%, list=32%, signal=32%	AT5G06680/AT5G07590/AT5G40740/AT4G09550/AT5G48520/AT4G21270/AT1G73790/AT1G50710
GO:0009838	abscission	23	0.39624	1.13316	0.293144	0.788102	4547	tags=43%, list=22%, signal=34%	AT4G28490/AT2G41850/AT2G19710/AT2G41370/AT4G18425/AT5G62165/AT3G21220/AT1G71830/AT1G51660/AT3G21550
GO:0006312	mitotic recombination	14	0.446453	1.13314	0.293182	0.788102	6784	tags=64%, list=33%, signal=43%	AT3G10140/AT4G30870/AT3G22880/AT1G07745/AT3G05210/AT4G09140/AT5G64520/AT2G19490/AT3G02680
GO:0010363	regulation of plant-type hypersensitive response	14	0.446488	1.13323	0.293182	0.788102	7456	tags=57%, list=37%, signal=36%	AT1G32540/AT1G18773/AT1G03160/AT1G77300/AT4G37000/AT1G30460/AT3G25070/AT4G36290
GO:0006782	protoporphyrinogen IX biosynthetic process	14	-0.481877	-1.15765	0.293594	0.788102	7434	tags=64%, list=37%, signal=41%	AT5G63290/AT1G58290/AT4G03205/AT5G63570/AT2G26540/AT5G08280/AT1G69740/AT1G09940
GO:0046501	protoporphyrinogen IX metabolic process	14	-0.481877	-1.15765	0.293594	0.788102	7434	tags=64%, list=37%, signal=41%	AT5G63290/AT1G58290/AT4G03205/AT5G63570/AT2G26540/AT5G08280/AT1G69740/AT1G09940
GO:0009744	response to sucrose	62	-0.345842	-1.12119	0.29374	0.788102	4717	tags=34%, list=23%, signal=26%	AT3G06850/AT5G08790/AT2G30470/AT2G28190/AT1G04700/AT5G61230/AT2G28900/AT5G57610/AT4G01900/AT4G37220/AT3G49340/AT1G08830/AT4G30850/AT5G45890/AT3G54320/AT3G12700/AT1G61800/AT3G16350/AT5G56840/AT3G16690
GO:0043405	regulation of MAP kinase activity	11	0.476417	1.14293	0.294372	0.788102	2217	tags=27%, list=11%, signal=24%	AT3G45640/AT2G20470/AT5G63190
GO:0048584	positive regulation of response to stimulus	239	-0.271562	-1.06881	0.294667	0.788102	4063	tags=24%, list=20%, signal=20%	AT1G55830/AT1G67360/AT2G47410/AT1G77620/AT1G70800/AT3G15730/AT1G64670/AT5G37740/AT2G46020/AT5G13160/AT5G53000/AT1G05100/AT1G69935/AT1G19250/AT1G66230/AT3G16730/AT3G54030/AT4G33950/AT4G03460/AT1G52400/AT5G18610/AT2G32550/AT1G64105/AT5G58070/AT3G57120/AT4G26750/AT3G63010/AT5G41790/AT1G74330/AT2G28650/AT4G03110/AT1G09995/AT3G17980/AT2G01540/AT3G05500/AT4G39070/AT4G03550/AT5G46350/AT1G48000/AT3G55150…
GO:0000726	non-recombinational repair	14	0.444476	1.12812	0.295455	0.788102	7704	tags=64%, list=38%, signal=40%	AT4G02390/AT5G40820/AT1G10520/AT5G67100/AT3G23100/AT1G66730/AT1G48050/AT2G45700/AT5G57160
GO:0006303	double-strand break repair via nonhomologous end joining	14	0.444476	1.12812	0.295455	0.788102	7704	tags=64%, list=38%, signal=40%	AT4G02390/AT5G40820/AT1G10520/AT5G67100/AT3G23100/AT1G66730/AT1G48050/AT2G45700/AT5G57160
GO:0031047	gene silencing by RNA	90	0.283711	1.07255	0.295652	0.788102	2893	tags=18%, list=14%, signal=15%	AT5G36740/AT5G36670/AT1G69440/AT5G43810/AT1G05460/AT1G66700/AT4G25530/AT1G54440/AT1G15910/AT1G31290/AT1G63020/AT1G05380/AT2G16485/AT5G04290/AT1G08060/AT2G35160
GO:0046834	lipid phosphorylation	12	-0.500008	-1.1523	0.2959	0.788102	5720	tags=67%, list=28%, signal=48%	AT5G54390/AT5G64000/AT4G05090/AT2G46500/AT5G63990/AT5G63980/AT1G34260
GO:0046854	phosphatidylinositol phosphorylation	12	-0.500008	-1.1523	0.2959	0.788102	5720	tags=67%, list=28%, signal=48%	AT5G54390/AT5G64000/AT4G05090/AT2G46500/AT5G63990/AT5G63980/AT1G34260
GO:0051049	regulation of transport	150	-0.28718	-1.07598	0.296296	0.788102	4949	tags=32%, list=24%, signal=24%	AT3G51300/AT4G05590/AT3G44850/AT2G27350/AT5G16490/AT1G63900/AT4G10130/AT5G50440/AT1G01130/AT5G42960/AT5G62000/AT4G04340/AT4G18710/AT4G16144/AT2G44770/AT1G02410/AT5G60590/AT5G50550/AT1G25250/AT4G33950/AT5G19820/AT4G17170/AT2G17290/AT4G30600/AT5G11790/AT5G41790/AT4G19720/AT5G15930/AT4G23650/AT1G09995/AT4G27500/AT3G07890/AT5G52580/AT1G01140/AT3G02460/AT3G03000/AT1G35670/AT3G62690/AT4G28550/AT3G11410…
GO:0045261	proton-transporting ATP synthase complex, catalytic core F(1)	13	-0.482352	-1.14463	0.297153	0.788102	8786	tags=77%, list=43%, signal=44%	ATMG01190/AT5G47030/AT5G08670/ATCG00120/AT1G51650/AT2G33040/AT2G07698/ATCG00470/ATCG00480
GO:0071490	cellular response to far red light	13	-0.482061	-1.14394	0.297153	0.788102	1815	tags=38%, list=9%, signal=35%	AT4G19990/AT2G32250/AT1G52520/AT5G15840
GO:0034475	U4 snRNA 3'-end processing	10	0.480023	1.13773	0.297645	0.788102	8165	tags=60%, list=40%, signal=36%	AT2G25355/AT3G46210/AT3G12990/AT3G60500/AT1G60080/AT4G32175
GO:0010769	regulation of cell morphogenesis involved in differentiation	30	-0.393587	-1.12161	0.297762	0.788102	1238	tags=17%, list=6%, signal=16%	AT3G07160/AT1G35670/AT5G09890/AT5G52882
GO:0000777	condensed chromosome kinetochore	19	0.412057	1.12289	0.298368	0.788102	7650	tags=63%, list=38%, signal=39%	AT1G13448/AT1G69400/AT1G49910/AT5G16940/AT5G05970/AT4G21270/AT1G58210/AT1G77720/AT1G01370/AT5G05510/AT2G33560/AT1G15660
GO:0043255	regulation of carbohydrate biosynthetic process	31	-0.393553	-1.13137	0.298635	0.788102	1883	tags=16%, list=9%, signal=15%	AT1G74350/AT3G02140/AT5G63370/AT2G30830
GO:0005655	nucleolar ribonuclease P complex	11	0.47378	1.13661	0.298701	0.788102	6501	tags=82%, list=32%, signal=56%	AT1G15910/AT5G59980/AT5G59390/AT4G00380/AT1G80790/AT5G23570/AT3G48670/AT3G12550/AT3G29375
GO:0030677	ribonuclease P complex	11	0.47378	1.13661	0.298701	0.788102	6501	tags=82%, list=32%, signal=56%	AT1G15910/AT5G59980/AT5G59390/AT4G00380/AT1G80790/AT5G23570/AT3G48670/AT3G12550/AT3G29375
GO:0030681	multimeric ribonuclease P complex	11	0.47378	1.13661	0.298701	0.788102	6501	tags=82%, list=32%, signal=56%	AT1G15910/AT5G59980/AT5G59390/AT4G00380/AT1G80790/AT5G23570/AT3G48670/AT3G12550/AT3G29375
GO:0045732	positive regulation of protein catabolic process	16	0.423434	1.10963	0.298851	0.788102	4097	tags=31%, list=20%, signal=25%	AT5G18650/AT3G53230/AT2G16090/AT1G05890/AT2G31510
GO:0015645	fatty acid ligase activity	10	-0.527117	-1.14698	0.299065	0.788102	2410	tags=70%, list=12%, signal=62%	AT2G04350/AT2G47240/AT1G77590/AT3G05970/AT4G23850/AT1G62940
GO:0021700	developmental maturation	67	0.299483	1.07964	0.299465	0.788102	3364	tags=25%, list=17%, signal=21%	AT4G28520/AT1G03890/AT5G44120/AT1G69490/AT1G03880/AT4G11280/AT2G38120/AT2G17820/AT3G54390/AT5G05550/AT3G11100/AT5G03280/AT4G30980/AT4G00730/AT5G64980/AT1G13980/AT1G71830
GO:0003690	double-stranded DNA binding	248	0.241938	1.0517	0.299595	0.788102	2686	tags=20%, list=13%, signal=17%	AT4G14465/AT5G36740/AT5G36670/AT2G46400/AT2G20100/AT5G51870/AT3G56980/AT1G31050/AT4G36020/AT3G50870/AT1G17460/AT5G16600/AT2G18380/AT5G04150/AT1G51140/AT5G25830/AT4G29100/AT4G39410/AT5G59430/AT5G66320/AT3G46590/AT5G26630/AT1G31760/AT1G20900/AT5G48670/AT2G41240/AT4G02070/AT5G06550/AT3G24320/AT2G03710/AT3G60530/AT5G56860/AT2G36000/AT3G19500/AT1G27660/AT2G22540/AT4G39100/AT3G18524/AT4G09960/AT3G10140…
GO:0016722	oxidoreductase activity, oxidizing metal ions	34	-0.380854	-1.11523	0.299663	0.788102	2055	tags=21%, list=10%, signal=19%	AT5G48100/AT4G12420/AT3G56090/AT5G48450/AT5G01040/AT5G01050
GO:0009867	jasmonic acid mediated signaling pathway	50	-0.357762	-1.1175	0.299674	0.788102	2815	tags=24%, list=14%, signal=21%	AT3G03760/AT5G41315/AT5G63970/AT4G09820/AT5G40350/AT5G53060/AT3G17860/AT5G17490/AT3G22275/AT3G15500/AT2G46370
GO:0030247	polysaccharide binding	91	0.282644	1.07097	0.299712	0.788102	3087	tags=27%, list=15%, signal=23%	AT2G26400/AT1G16090/AT2G30933/AT1G05850/AT1G26450/AT4G13600/AT1G21210/AT5G56590/AT5G58480/AT1G69910/AT1G66250/AT5G20870/AT3G58100/AT1G21240/AT1G66880/AT5G35740/AT1G13830/AT2G04270/AT5G42720/AT3G15800/AT1G21245/AT4G17180/AT4G29360/AT1G21250/AT3G57240
GO:0005743	mitochondrial inner membrane	147	-0.287571	-1.07674	0.299859	0.788102	5675	tags=34%, list=28%, signal=25%	AT3G59280/AT4G32210/AT3G24200/AT2G45270/AT4G17650/AT2G07741/AT5G01500/AT3G24570/AT5G09600/ATMG01170/AT3G08950/AT3G02090/AT5G05370/AT4G39740/AT2G39970/AT4G01660/AT1G32350/AT3G54110/AT1G15220/AT1G65540/AT5G39900/AT2G07698/AT5G03030/AT2G44520/ATMG00160/AT2G30920/AT1G14140/AT5G13490/AT4G27940/AT1G02410/AT3G27380/AT4G05020/AT3G51870/AT1G14560/AT2G46320/AT5G15640/AT1G72750/AT5G07320/AT5G56450/ATMG00180…
GO:1904062	regulation of cation transmembrane transport	11	-0.518261	-1.15803	0.3	0.788102	4949	tags=55%, list=24%, signal=41%	AT4G05590/AT5G62000/AT1G02410/AT4G27500/AT1G35670
GO:0051510	regulation of unidimensional cell growth	25	-0.4071	-1.12882	0.300341	0.788102	1239	tags=28%, list=6%, signal=26%	AT2G41630/AT4G20260/AT3G07160/AT1G35670/AT3G02170/AT3G13530
GO:0097526	spliceosomal tri-snRNP complex	31	0.361779	1.11922	0.300481	0.788102	8147	tags=48%, list=40%, signal=29%	AT4G20440/AT3G56790/AT2G41500/AT1G03330/AT1G21190/AT4G12600/AT3G05760/AT4G30330/AT5G16780/AT5G48870/AT5G44500/AT3G59810/AT3G62840/AT1G60170/AT1G03140
GO:0016180	snRNA processing	13	0.450332	1.12411	0.302273	0.788102	8165	tags=54%, list=40%, signal=32%	AT2G25355/AT3G46210/AT5G51170/AT3G12990/AT3G60500/AT1G60080/AT4G32175
GO:0007094	mitotic spindle assembly checkpoint	11	0.472328	1.13313	0.30303	0.788102	2360	tags=27%, list=12%, signal=24%	AT1G13448/AT1G69400/AT1G49910
GO:0031577	spindle checkpoint	11	0.472328	1.13313	0.30303	0.788102	2360	tags=27%, list=12%, signal=24%	AT1G13448/AT1G69400/AT1G49910
GO:0033046	negative regulation of sister chromatid segregation	11	0.472328	1.13313	0.30303	0.788102	2360	tags=27%, list=12%, signal=24%	AT1G13448/AT1G69400/AT1G49910
GO:0033048	negative regulation of mitotic sister chromatid segregation	11	0.472328	1.13313	0.30303	0.788102	2360	tags=27%, list=12%, signal=24%	AT1G13448/AT1G69400/AT1G49910
GO:0045841	negative regulation of mitotic metaphase/anaphase transition	11	0.472328	1.13313	0.30303	0.788102	2360	tags=27%, list=12%, signal=24%	AT1G13448/AT1G69400/AT1G49910
GO:0051985	negative regulation of chromosome segregation	11	0.472328	1.13313	0.30303	0.788102	2360	tags=27%, list=12%, signal=24%	AT1G13448/AT1G69400/AT1G49910
GO:0071173	spindle assembly checkpoint	11	0.472328	1.13313	0.30303	0.788102	2360	tags=27%, list=12%, signal=24%	AT1G13448/AT1G69400/AT1G49910
GO:0071174	mitotic spindle checkpoint	11	0.472328	1.13313	0.30303	0.788102	2360	tags=27%, list=12%, signal=24%	AT1G13448/AT1G69400/AT1G49910
GO:1902100	negative regulation of metaphase/anaphase transition of cell cycle	11	0.472328	1.13313	0.30303	0.788102	2360	tags=27%, list=12%, signal=24%	AT1G13448/AT1G69400/AT1G49910
GO:1905819	negative regulation of chromosome separation	11	0.472328	1.13313	0.30303	0.788102	2360	tags=27%, list=12%, signal=24%	AT1G13448/AT1G69400/AT1G49910
GO:2000816	negative regulation of mitotic sister chromatid separation	11	0.472328	1.13313	0.30303	0.788102	2360	tags=27%, list=12%, signal=24%	AT1G13448/AT1G69400/AT1G49910
GO:0046434	organophosphate catabolic process	32	-0.387842	-1.12342	0.303082	0.788102	1775	tags=16%, list=9%, signal=14%	AT3G03520/AT3G02040/AT5G41080/AT1G68760
GO:0010073	meristem maintenance	16	0.420653	1.10234	0.303448	0.788102	1250	tags=19%, list=6%, signal=18%	AT5G06250/AT1G23380/AT5G19740
GO:0034427	nuclear-transcribed mRNA catabolic process, exonucleolytic, 3'-5'	15	-0.466934	-1.13407	0.303571	0.788102	205	tags=100%, list=1%, signal=99%	AT2G06990/AT1G76630/AT3G46210/AT3G12990/AT3G60500/AT1G60080/AT4G32175/AT3G46960/AT1G03360/AT5G38890/AT3G61620/AT3G07750/AT4G27490/AT1G77680
GO:0022836	gated channel activity	73	-0.323263	-1.08061	0.303599	0.788102	2135	tags=29%, list=11%, signal=26%	AT3G04110/AT4G04340/AT2G24610/AT5G19520/AT2G32400/AT1G53470/AT2G28260/AT5G57940/AT1G19570/AT5G40890/AT5G11210/AT2G29120/AT1G78610/AT1G01340/AT4G32650/AT3G14810/AT4G27970/AT5G15410/AT3G27170/AT5G24030
GO:0061980	regulatory RNA binding	10	0.478082	1.13313	0.304069	0.788209	390	tags=10%, list=2%, signal=10%	AT5G43810
GO:0009891	positive regulation of biosynthetic process	376	0.226391	1.03257	0.304124	0.788209	2769	tags=16%, list=14%, signal=14%	AT1G32640/AT4G25490/AT5G61600/AT4G23810/AT4G27260/AT5G51870/AT1G73870/AT5G22290/AT1G32770/AT1G68130/AT1G46768/AT1G79180/AT3G61910/AT5G50080/AT4G18880/AT5G11470/AT3G24140/AT1G49010/AT5G44160/AT4G17880/AT5G13250/AT4G28500/AT4G39410/AT2G46770/AT5G26630/AT1G28470/AT5G48670/AT2G27230/AT4G01540/AT1G64490/AT3G10500/AT2G03710/AT5G47220/AT2G47460/AT1G04020/AT5G49430/AT2G38340/AT2G22540/AT5G61330/AT1G55350…
GO:0048638	regulation of developmental growth	105	0.271994	1.05143	0.305638	0.791505	2410	tags=19%, list=12%, signal=17%	AT5G03150/AT3G54720/AT5G46260/AT2G35230/AT1G03170/AT5G03680/AT2G13680/AT1G31650/AT1G49010/AT2G19710/AT1G67710/AT3G06020/AT1G75820/AT1G29510/AT5G13290/AT4G20270/AT5G46270/AT5G18830/AT3G15150/AT1G66810
GO:0002237	response to molecule of bacterial origin	45	-0.360813	-1.11544	0.306321	0.792202	2029	tags=22%, list=10%, signal=20%	AT3G55150/AT5G27060/AT4G20260/AT4G31800/AT4G23210/AT5G10720/AT1G51800/AT1G73260/AT2G23770
GO:0010267	production of ta-siRNAs involved in RNA interference	13	0.448914	1.12057	0.306818	0.792202	256	tags=8%, list=1%, signal=8%	AT1G69440
GO:0004499	N,N-dimethylaniline monooxygenase activity	16	-0.461562	-1.13547	0.306878	0.792202	5267	tags=56%, list=26%, signal=42%	AT1G62600/AT1G65860/AT1G12140/AT1G62560/AT1G63370/AT1G19250/AT5G43890/AT4G28720
GO:0098552	side of membrane	16	-0.461806	-1.13607	0.306878	0.792202	3079	tags=38%, list=15%, signal=32%	AT3G58760/AT1G14000/AT2G43850/AT5G58070/AT4G18950
GO:1902903	regulation of supramolecular fiber organization	58	-0.344828	-1.10995	0.3072	0.792406	2173	tags=21%, list=11%, signal=19%	AT5G44610/AT1G60430/AT2G01330/AT3G25500/AT5G54650/AT4G20260/AT1G64110/AT1G70140/AT3G60260/AT5G01730/AT5G52882
GO:0044427	chromosomal part	259	0.241008	1.04809	0.307692	0.792979	7466	tags=44%, list=37%, signal=28%	AT2G18050/AT1G77310/AT1G17460/AT1G14460/AT5G59430/AT5G64910/AT4G24790/AT3G46590/AT4G27595/AT1G13448/AT4G18820/AT1G48620/AT4G13570/AT2G28720/AT3G55580/AT1G69400/AT4G39100/AT2G44150/AT5G15920/AT3G15150/AT2G32590/AT1G49910/AT4G29910/AT1G67630/AT5G54260/AT3G44530/AT3G12810/AT5G45720/AT5G04940/AT2G02480/AT2G35160/AT3G46580/AT5G65780/AT2G36720/AT3G25100/AT3G59550/AT5G46910/AT5G51340/AT3G15120/AT3G01320…
GO:0001134	transcription regulator recruiting activity	84	0.282761	1.07082	0.30854	0.792979	2400	tags=25%, list=12%, signal=22%	AT4G33450/AT2G46410/AT5G26660/AT1G18570/AT1G63910/AT1G06180/AT1G79180/AT3G50060/AT5G16600/AT3G13540/AT3G46130/AT4G21440/AT5G61420/AT1G26780/AT1G17950/AT5G07690/AT1G74080/AT2G47460/AT5G53200/AT2G37630/AT5G12870
GO:0001135	RNA polymerase II transcription regulator recruiting activity	84	0.282761	1.07082	0.30854	0.792979	2400	tags=25%, list=12%, signal=22%	AT4G33450/AT2G46410/AT5G26660/AT1G18570/AT1G63910/AT1G06180/AT1G79180/AT3G50060/AT5G16600/AT3G13540/AT3G46130/AT4G21440/AT5G61420/AT1G26780/AT1G17950/AT5G07690/AT1G74080/AT2G47460/AT5G53200/AT2G37630/AT5G12870
GO:0016109	tetraterpenoid biosynthetic process	26	-0.399761	-1.1126	0.308874	0.792979	1841	tags=35%, list=9%, signal=32%	AT4G22260/AT2G23800/AT5G52570/AT3G53130/AT3G14530/AT3G29430/AT4G36810/AT1G49530
GO:0016117	carotenoid biosynthetic process	26	-0.399761	-1.1126	0.308874	0.792979	1841	tags=35%, list=9%, signal=32%	AT4G22260/AT2G23800/AT5G52570/AT3G53130/AT3G14530/AT3G29430/AT4G36810/AT1G49530
GO:0046906	tetrapyrrole binding	308	-0.263645	-1.05712	0.30888	0.792979	2505	tags=17%, list=12%, signal=15%	AT4G31950/AT5G66390/AT3G49120/ATCG00580/AT3G01190/AT5G36220/AT2G45970/AT4G11290/AT3G53300/AT2G30490/AT3G52970/AT1G05240/AT1G68850/AT2G30750/AT1G33720/AT3G03670/AT2G46650/AT4G00360/AT5G19880/AT5G42650/AT1G07890/AT3G14680/AT5G14130/AT3G55840/AT4G37400/AT3G20940/AT2G27000/AT5G52320/AT1G64940/AT3G28740/AT5G05340/AT5G57260/AT4G15330/AT5G67310/AT3G48520/AT5G64100/AT5G06720/AT1G17060/AT5G17820/AT5G52240…
GO:0040012	regulation of locomotion	12	0.454558	1.1169	0.310658	0.79504	7941	tags=67%, list=39%, signal=41%	AT1G01760/AT2G14825/AT4G40050/AT1G53165/AT2G24280/AT3G15610/AT5G01160/AT3G03570
GO:0043408	regulation of MAPK cascade	12	0.454554	1.11689	0.310658	0.79504	2217	tags=25%, list=11%, signal=22%	AT3G45640/AT2G20470/AT5G63190
GO:0051270	regulation of cellular component movement	12	0.454558	1.1169	0.310658	0.79504	7941	tags=67%, list=39%, signal=41%	AT1G01760/AT2G14825/AT4G40050/AT1G53165/AT2G24280/AT3G15610/AT5G01160/AT3G03570
GO:2000145	regulation of cell motility	12	0.454558	1.1169	0.310658	0.79504	7941	tags=67%, list=39%, signal=41%	AT1G01760/AT2G14825/AT4G40050/AT1G53165/AT2G24280/AT3G15610/AT5G01160/AT3G03570
GO:0010018	far-red light signaling pathway	11	-0.511305	-1.14249	0.312963	0.800207	1815	tags=45%, list=9%, signal=41%	AT4G19990/AT2G32250/AT1G52520/AT5G15840
GO:0009098	leucine biosynthetic process	13	-0.478771	-1.13613	0.313167	0.800207	6899	tags=69%, list=34%, signal=46%	AT1G80560/AT2G43090/AT5G23020/AT1G10070/AT1G18500/AT3G49680/AT4G13430/AT5G14200
GO:0016602	CCAAT-binding factor complex	11	0.469918	1.12734	0.313853	0.800745	4476	tags=36%, list=22%, signal=28%	AT5G43250/AT2G34720/AT1G72830/AT5G12840
GO:0044455	mitochondrial membrane part	134	-0.291425	-1.07929	0.313869	0.800745	7158	tags=41%, list=35%, signal=27%	AT3G17240/AT2G20360/AT1G27390/AT2G38280/AT2G46505/AT1G47420/AT1G16700/AT1G79010/AT1G51650/AT5G62575/AT4G26780/AT4G34700/AT5G67590/AT4G32470/AT2G21870/AT2G33040/AT1G08480/AT3G27240/AT2G07671/AT2G02510/AT1G51980/AT1G07180/AT3G59280/ATMG01080/AT2G33220/AT4G28510/AT4G14695/AT1G20350/AT3G15640/AT1G53760/AT3G02090/AT2G20530/AT5G66760/AT4G37830/AT5G13440/AT4G05590/AT1G04630/AT2G28900/AT1G52710/AT1G02410…
GO:0050660	flavin adenine dinucleotide binding	127	-0.291973	-1.07225	0.315634	0.804065	2499	tags=15%, list=12%, signal=13%	AT4G15760/AT1G58440/AT4G16760/AT4G29740/AT4G20860/AT1G30730/AT3G63440/AT1G30720/AT5G43890/AT5G44390/AT5G44380/AT3G23410/AT1G75450/AT2G46740/AT3G30775/AT4G28720/AT5G38710/AT3G09940
GO:0031398	positive regulation of protein ubiquitination	13	0.447331	1.11662	0.315909	0.804065	6058	tags=38%, list=30%, signal=27%	AT1G79030/AT4G04180/AT2G18290/AT4G33270/AT1G73950
GO:1903322	positive regulation of protein modification by small protein conjugation or removal	13	0.447331	1.11662	0.315909	0.804065	6058	tags=38%, list=30%, signal=27%	AT1G79030/AT4G04180/AT2G18290/AT4G33270/AT1G73950
GO:0008514	organic anion transmembrane transporter activity	154	-0.281779	-1.05929	0.316239	0.804278	3176	tags=22%, list=16%, signal=19%	AT3G20660/AT5G36940/AT3G51870/AT1G80510/AT1G14560/AT3G57280/AT5G61730/AT3G13050/AT1G71890/AT5G63850/AT1G12600/AT5G07320/AT5G56450/AT3G11680/AT4G35180/AT5G48970/AT3G01550/AT4G23010/AT3G47960/AT5G15240/AT4G17970/AT4G25010/AT5G02170/AT4G31600/AT5G27520/AT3G56200/AT1G61800/AT2G36590/AT2G39130/AT5G09470/AT5G41800/AT1G16370/AT5G61810
GO:0005666	RNA polymerase III complex	15	0.431506	1.11782	0.316742	0.804376	3410	tags=20%, list=17%, signal=17%	AT1G63020/AT1G54250/AT1G06790
GO:0010333	terpene synthase activity	21	-0.423385	-1.11307	0.316988	0.804376	573	tags=29%, list=3%, signal=28%	AT1G61680/AT4G13280/AT3G25820/AT5G48110/AT1G61120
GO:0071216	cellular response to biotic stimulus	16	0.418126	1.09572	0.317241	0.804376	2217	tags=31%, list=11%, signal=28%	AT5G47130/AT5G26920/AT1G73805/AT2G33550/AT5G63190
GO:0015165	pyrimidine nucleotide-sugar transmembrane transporter activity	12	-0.495721	-1.14242	0.317291	0.804376	3176	tags=25%, list=16%, signal=21%	AT4G23010/AT4G31600
GO:0000175	3'-5'-exoribonuclease activity	27	0.368766	1.09811	0.317647	0.804376	1782	tags=19%, list=9%, signal=17%	AT1G61470/AT5G22250/AT3G44260/AT5G14580/AT1G54440
GO:0042436	indole-containing compound catabolic process	10	-0.52175	-1.13531	0.317757	0.804376	2614	tags=50%, list=13%, signal=44%	AT4G34180/AT2G22330/AT3G09260/AT3G55840
GO:0002239	response to oomycetes	53	-0.350206	-1.10232	0.318108	0.80464	3972	tags=36%, list=20%, signal=29%	AT5G55830/AT1G08720/AT5G10530/AT1G56510/AT2G43700/AT1G15530/AT4G35985/AT1G57630/AT1G74330/AT5G24530/AT4G10500/AT5G60300/AT1G51800/AT3G23550/AT4G10490/AT5G60270/AT5G24660/AT3G59740
GO:0005992	trehalose biosynthetic process	20	-0.43387	-1.11967	0.318505	0.804749	1747	tags=30%, list=9%, signal=27%	AT2G18700/AT4G22590/AT1G06410/AT1G70290/AT5G51460
GO:0008173	RNA methyltransferase activity	49	0.31625	1.08357	0.318653	0.804749	7373	tags=43%, list=36%, signal=27%	AT4G26600/AT2G21070/AT4G25630/AT4G10760/AT4G28020/AT5G17660/AT1G01860/AT5G26180/AT2G28450/AT3G21300/AT5G47680/AT1G06560/AT2G39670/AT4G25730/AT1G36310/AT5G57280/AT3G13180/AT4G20910/AT3G20650/AT5G66360/AT3G56120
GO:0070008	serine-type exopeptidase activity	27	-0.399341	-1.11169	0.318891	0.804749	187	tags=26%, list=1%, signal=26%	AT5G08260/AT5G22980/AT5G23210/AT4G30610/AT1G15000/AT4G15100
GO:0044089	positive regulation of cellular component biogenesis	56	0.303109	1.06248	0.320106	0.807191	3064	tags=21%, list=15%, signal=18%	AT4G33450/AT1G29170/AT1G17950/AT2G31300/AT3G21700/AT5G07780/AT5G12870/AT5G06680/AT1G09100/AT2G14825/AT1G03830/AT2G33385
GO:0050661	NADP binding	50	-0.349781	-1.09257	0.320847	0.807195	5866	tags=40%, list=29%, signal=29%	AT1G79530/AT1G42970/AT3G24170/AT1G14810/AT1G12160/AT1G76490/AT2G36680/AT1G62600/AT1G65860/AT1G12140/AT1G62560/AT1G63370/AT1G19250/AT1G09420/AT5G21060/AT3G52940/AT1G09940/AT5G43890/AT4G28720
GO:0005667	transcription factor complex	101	-0.301149	-1.06909	0.321157	0.807195	2510	tags=13%, list=12%, signal=11%	AT3G24050/AT1G73690/AT4G22360/AT5G09250/AT1G27720/AT5G51790/AT4G25410/AT4G25400/AT5G51780/AT4G26150/AT1G62975/AT1G12540
GO:0016651	oxidoreductase activity, acting on NAD(P)H	94	-0.301441	-1.06111	0.321157	0.807195	7165	tags=40%, list=35%, signal=26%	AT4G16155/AT3G17240/AT2G20360/AT3G02730/AT2G05215/AT3G15360/AT4G37200/AT5G20080/AT1G16700/AT1G79010/AT3G47520/AT3G06730/AT5G67590/AT4G16440/AT1G07180/AT3G08710/AT3G24170/AT4G27270/AT5G42980/AT3G02280/AT1G50320/AT5G03630/AT5G15910/AT4G11230/AT1G64060/ATCG00430/AT1G31020/AT4G30210/AT1G09090/AT1G59730/AT1G76080/ATMG00580/AT3G53220/AT1G45145/AT5G07390/AT5G51060/AT3G09940
GO:0009617	response to bacterium	399	-0.255586	-1.04986	0.321429	0.807195	3108	tags=21%, list=15%, signal=18%	AT2G17520/AT5G02500/AT2G43120/AT4G31500/AT5G54640/AT4G36000/AT4G19510/AT4G33950/AT2G27080/AT1G32740/AT1G02930/AT4G22305/AT4G03460/AT1G79380/AT4G11650/AT5G67300/AT2G43700/AT1G69370/AT4G23130/AT1G11580/AT2G22330/AT4G23260/AT2G26440/AT4G02520/AT1G15530/AT5G63970/AT3G49120/AT3G50480/AT2G47730/AT4G15760/AT5G56030/AT3G26470/AT1G08830/AT1G12240/AT2G41430/AT1G74330/AT5G01900/AT2G28650/AT2G13810/AT5G24530…
GO:0009910	negative regulation of flower development	40	-0.366029	-1.09844	0.321489	0.807195	1547	tags=15%, list=8%, signal=14%	AT4G28190/AT5G65070/AT1G13260/AT4G26150/AT2G27550
GO:0004565	beta-galactosidase activity	16	0.413835	1.08448	0.321839	0.807195	7891	tags=69%, list=39%, signal=42%	AT5G56870/AT5G20710/AT3G13750/AT3G52840/AT1G72990/AT4G26140/AT1G45130/AT4G36360/AT3G54440/AT5G63800/AT2G28470
GO:0008559	ATPase-coupled xenobiotic transmembrane transporter activity	16	0.415127	1.08786	0.321839	0.807195	5630	tags=50%, list=28%, signal=36%	AT3G60970/AT3G13080/AT3G62700/AT3G60160/AT3G59140/AT2G47800/AT1G04120/AT3G13090
GO:0044463	cell projection part	31	-0.386667	-1.11158	0.322526	0.807621	4494	tags=32%, list=22%, signal=25%	AT3G02810/AT4G28000/AT3G51460/AT2G03270/AT5G49680/AT1G64110/AT4G17470/AT5G09890/AT5G52882
GO:0120038	plasma membrane bounded cell projection part	31	-0.386667	-1.11158	0.322526	0.807621	4494	tags=32%, list=22%, signal=25%	AT3G02810/AT4G28000/AT3G51460/AT2G03270/AT5G49680/AT1G64110/AT4G17470/AT5G09890/AT5G52882
GO:0009740	gibberellic acid mediated signaling pathway	57	0.301774	1.06236	0.322751	0.807621	1630	tags=21%, list=8%, signal=19%	AT5G66350/AT4G02780/AT5G39860/AT1G67030/AT1G09530/AT2G20180/AT5G48170/AT5G61850/AT5G51810/AT1G74670/AT5G15160/AT5G56860
GO:0004707	MAP kinase activity	20	-0.431915	-1.11462	0.323843	0.808282	2253	tags=25%, list=11%, signal=22%	AT3G14720/AT2G01450/AT2G42880/AT3G18040
GO:0005351	carbohydrate:proton symporter activity	49	-0.34953	-1.09407	0.324675	0.808282	3474	tags=24%, list=17%, signal=20%	AT2G20780/AT1G71880/AT1G08930/AT5G23270/AT3G19930/AT1G08890/AT3G05155/AT1G11260/AT1G19450/AT1G75220/AT4G36670
GO:0005402	carbohydrate:cation symporter activity	49	-0.34953	-1.09407	0.324675	0.808282	3474	tags=24%, list=17%, signal=20%	AT2G20780/AT1G71880/AT1G08930/AT5G23270/AT3G19930/AT1G08890/AT3G05155/AT1G11260/AT1G19450/AT1G75220/AT4G36670
GO:0006536	glutamate metabolic process	23	-0.405846	-1.09651	0.324698	0.808282	321	tags=48%, list=2%, signal=47%	AT1G62800/AT4G31990/AT5G62530/AT5G11520/AT4G39660/AT2G30970/AT1G79440/AT5G19550/AT3G30775/AT5G38710
GO:0072350	tricarboxylic acid metabolic process	13	0.442677	1.105	0.325	0.808282	789	tags=15%, list=4%, signal=15%	AT5G04950/AT1G56430
GO:0055083	monovalent inorganic anion homeostasis	18	-0.437579	-1.10924	0.325044	0.808282	3267	tags=39%, list=16%, signal=33%	AT1G14040/AT4G17550/AT5G58070/AT3G47420/AT3G02040/AT5G41080
GO:0047484	regulation of response to osmotic stress	47	-0.352048	-1.09492	0.325163	0.808282	4312	tags=32%, list=21%, signal=25%	AT4G06634/AT2G32700/AT4G25520/AT1G66230/AT3G51960/AT5G58070/AT5G62090/AT3G17980/AT5G46350/AT1G48000/AT3G62690/AT1G15100/AT2G01150/AT5G24660
GO:0044426	cell wall part	10	-0.518941	-1.12919	0.325234	0.808282	1845	tags=40%, list=9%, signal=36%	AT3G51550/AT2G36100/AT2G27370
GO:0006904	vesicle docking involved in exocytosis	17	-0.444235	-1.11296	0.325704	0.808282	3850	tags=59%, list=19%, signal=48%	AT1G77140/AT3G53610/AT5G59840/AT3G46060/AT4G02350/AT1G12360/AT4G12120/AT3G10380/AT5G03520
GO:0016899	oxidoreductase activity, acting on the CH-OH group of donors, oxygen as acceptor	17	-0.443453	-1.111	0.325704	0.808282	2499	tags=18%, list=12%, signal=15%	AT3G23410/AT2G46740
GO:0002213	defense response to insect	18	0.413678	1.10673	0.32574	0.808282	1032	tags=22%, list=5%, signal=21%	AT1G74930/AT4G37370/AT4G37320/AT3G44260
GO:0000731	DNA synthesis involved in DNA repair	12	0.450202	1.1062	0.326531	0.809627	5524	tags=42%, list=27%, signal=30%	AT1G20720/AT1G24290/AT2G29570/AT1G07370/AT5G52800
GO:0051302	regulation of cell division	50	0.311664	1.07822	0.32732	0.809643	5325	tags=38%, list=26%, signal=28%	AT5G03150/AT3G24140/AT2G42640/AT4G24860/AT4G01540/AT3G59420/AT3G21700/AT3G15170/AT5G46080/AT1G21410/AT1G01510/AT3G15220/AT4G32730/AT5G16940/AT4G24480/AT5G05970/AT5G54840/AT4G20140/AT2G26330
GO:0006084	acetyl-CoA metabolic process	22	-0.41906	-1.12007	0.327556	0.809643	8282	tags=55%, list=41%, signal=32%	AT1G01090/AT1G24180/AT4G33150/AT1G09430/AT3G54250/AT1G31910/AT4G11820/AT1G76490/AT4G26910/AT5G55070/AT5G36880
GO:0006893	Golgi to plasma membrane transport	11	-0.505029	-1.12846	0.327778	0.809643	5868	tags=64%, list=29%, signal=45%	AT1G04117/AT1G75170/AT1G47560/AT5G52210/AT1G55830/AT3G10380
GO:0016408	C-acyltransferase activity	11	-0.50453	-1.12735	0.327778	0.809643	2185	tags=64%, list=11%, signal=57%	AT5G63380/AT5G48880/AT5G48230/AT1G04710/AT3G48780/AT3G48790
GO:0098876	vesicle-mediated transport to the plasma membrane	11	-0.505029	-1.12846	0.327778	0.809643	5868	tags=64%, list=29%, signal=45%	AT1G04117/AT1G75170/AT1G47560/AT5G52210/AT1G55830/AT3G10380
GO:0030684	preribosome	54	0.307216	1.07408	0.328042	0.809684	7276	tags=44%, list=36%, signal=29%	AT1G06720/AT1G17690/AT4G25630/AT5G16750/AT5G66540/AT3G11964/AT1G69070/AT3G22660/AT3G12860/AT3G04770/AT5G27120/AT4G12600/AT3G05060/AT3G06530/AT1G10490/AT4G25730/AT2G40360/AT5G08600/AT1G56110/AT5G08420/AT5G20600/AT5G14050/AT3G21540/AT1G15440
GO:0016877	ligase activity, forming carbon-sulfur bonds	42	-0.356325	-1.08353	0.328358	0.809851	5976	tags=38%, list=29%, signal=27%	AT2G20420/AT2G32410/AT2G30110/AT3G21240/AT1G51680/AT2G21470/AT3G16170/AT3G48990/AT1G66120/AT4G23850/AT1G62940/AT5G36880/AT1G65880/AT3G25880/AT3G21230
GO:0043266	regulation of potassium ion transport	10	-0.516248	-1.12333	0.328972	0.809871	4875	tags=50%, list=24%, signal=38%	AT1G01130/AT5G62000/AT1G01140/AT1G35670
GO:0005991	trehalose metabolic process	22	-0.417821	-1.11676	0.329289	0.809871	1747	tags=27%, list=9%, signal=25%	AT2G18700/AT4G22590/AT1G06410/AT1G70290/AT5G51460
GO:0046889	positive regulation of lipid biosynthetic process	26	-0.395432	-1.10055	0.329352	0.809871	2263	tags=15%, list=11%, signal=14%	AT3G27785/AT1G54540/AT5G61780
GO:0042546	cell wall biogenesis	123	-0.291608	-1.06523	0.329359	0.809871	3450	tags=27%, list=17%, signal=22%	AT3G45400/AT3G06550/AT5G09870/AT1G76670/AT5G05170/AT5G59150/AT5G45750/AT2G01850/AT1G56550/AT2G25540/AT4G03210/AT1G32170/AT4G14130/AT2G06850/AT5G48070/AT5G64740/AT1G65310/AT5G50750/AT1G06400/AT3G01640/AT4G30290/AT3G08900/AT3G15060/AT4G30270/AT5G15650/AT4G30280/AT5G57550/AT2G33570/AT3G23730/AT4G25810/AT2G18800/AT1G10550
GO:0015386	potassium:proton antiporter activity	10	0.465594	1.10353	0.329764	0.810257	8306	tags=60%, list=41%, signal=35%	AT5G27150/AT3G05030/AT3G06370/AT4G00630/AT2G01980/AT1G54370
GO:0012505	endomembrane system	80	-0.312109	-1.05617	0.33124	0.813055	3417	tags=24%, list=17%, signal=20%	AT3G59440/AT2G28180/AT3G20510/AT4G30600/AT2G28650/AT5G15930/AT1G09995/AT5G45840/AT1G10560/AT3G07890/AT3G55150/AT5G52580/AT3G02460/AT4G17970/AT4G28550/AT3G07040/AT4G27100/AT4G15330
GO:0048767	root hair elongation	30	-0.385515	-1.0986	0.332186	0.813055	1696	tags=13%, list=8%, signal=12%	AT5G16910/AT1G10480/AT1G12950
GO:0010027	thylakoid membrane organization	32	-0.381718	-1.10568	0.332192	0.813055	1120	tags=19%, list=6%, signal=18%	AT3G47450/AT3G10670/AT1G65260/AT2G31690/AT4G31780
GO:0008283	cell population proliferation	45	-0.347421	-1.07404	0.332253	0.813055	1879	tags=16%, list=9%, signal=14%	AT5G48070/AT4G30290/AT3G02460/AT3G44735/AT4G16780/AT2G22860
GO:0031667	response to nutrient levels	172	-0.274674	-1.04498	0.332386	0.813055	2426	tags=15%, list=12%, signal=13%	AT4G07820/AT1G66270/AT1G18910/AT3G62420/AT4G14680/AT3G03520/AT1G01140/AT4G20260/AT5G21040/AT5G65690/AT5G24810/AT5G60300/AT5G48850/AT3G62680/AT3G44320/AT5G51060/AT1G72180/AT3G02570/AT5G60890/AT5G24660/AT3G16690/AT4G21830/AT5G20150/AT1G61120
GO:0006644	phospholipid metabolic process	194	-0.274281	-1.05349	0.332398	0.813055	5889	tags=35%, list=29%, signal=25%	AT3G02600/AT4G11820/AT5G60600/AT5G39400/AT4G27030/AT1G31190/AT2G44620/AT1G11880/AT3G14550/AT2G23800/AT4G25050/AT1G75170/AT2G26830/AT5G25370/AT3G21500/AT4G02120/AT5G54390/AT1G76490/AT5G64000/AT2G04560/AT1G71710/AT4G34640/AT3G56960/AT5G65205/AT1G10740/AT4G05090/AT3G45740/AT3G15730/AT2G46500/AT1G62430/AT3G07215/AT5G63990/AT4G21220/AT5G63980/AT1G13560/AT4G34310/AT3G16785/AT2G39445/AT4G13280/AT1G32200…
GO:0050897	cobalt ion binding	42	-0.35427	-1.07728	0.333333	0.814122	2919	tags=50%, list=14%, signal=43%	AT3G22200/AT4G04955/AT3G17240/AT2G13560/AT5G18170/AT1G79750/AT1G03090/AT5G67590/AT2G21870/AT5G62530/AT1G71310/AT3G15640/AT5G66760/AT1G02920/AT1G02930/AT5G13450/AT4G00570/AT4G08870/AT5G07440/AT3G50970
GO:0051015	actin filament binding	34	-0.372972	-1.09215	0.333333	0.814122	2173	tags=18%, list=11%, signal=16%	AT3G25500/AT4G26700/AT5G55400/AT1G70140/AT1G21980
GO:0052542	defense response by callose deposition	18	-0.434542	-1.10154	0.333925	0.814144	4362	tags=44%, list=21%, signal=35%	AT1G24100/AT1G64060/AT4G23100/AT4G31500/AT2G22330/AT4G03550/AT5G46330
GO:0005736	RNA polymerase I complex	14	0.427936	1.08614	0.334091	0.814144	4927	tags=29%, list=24%, signal=22%	AT1G54250/AT3G57660/AT3G25940/AT3G23780
GO:0055046	microgametogenesis	14	0.428595	1.08781	0.334091	0.814144	5849	tags=57%, list=29%, signal=41%	AT3G55200/AT3G55220/AT5G12840/AT5G40740/AT4G14220/AT4G14150/AT1G74260/AT3G23670
GO:0030695	GTPase regulator activity	71	-0.319164	-1.06417	0.334361	0.814193	4424	tags=27%, list=22%, signal=21%	AT5G46750/AT1G70800/AT3G15730/AT5G37740/AT2G37550/AT5G50550/AT3G17660/AT5G15930/AT3G17980/AT2G01540/AT3G07890/AT5G52580/AT1G70790/AT3G02460/AT4G28550/AT5G61980/AT4G13350/AT4G27100
GO:0040020	regulation of meiotic nuclear division	11	0.463332	1.11154	0.335498	0.815504	2859	tags=27%, list=14%, signal=23%	AT3G01600/AT3G18524/AT2G46980
GO:1905348	endonuclease complex	16	0.409941	1.07427	0.335632	0.815504	6501	tags=69%, list=32%, signal=47%	AT2G21800/AT1G15910/AT4G30870/AT5G59980/AT5G59390/AT4G00380/AT1G80790/AT5G23570/AT3G48670/AT3G12550/AT3G29375
GO:0045330	aspartyl esterase activity	48	-0.348002	-1.08706	0.336039	0.815504	2691	tags=33%, list=13%, signal=29%	AT3G06830/AT4G33220/AT3G10720/AT1G11580/AT2G26440/AT5G64640/AT1G53840/AT5G20860/AT4G15980/AT4G02320/AT1G53830/AT4G02330/AT1G23200/AT3G49220/AT2G47550
GO:0030245	cellulose catabolic process	21	0.388264	1.09647	0.336427	0.815504	2160	tags=29%, list=11%, signal=26%	AT1G64390/AT1G71380/AT4G11050/AT1G70710/AT4G23560/AT4G39010
GO:0000291	nuclear-transcribed mRNA catabolic process, exonucleolytic	25	0.373501	1.08398	0.336538	0.815504	1032	tags=12%, list=5%, signal=11%	AT1G61470/AT5G22250/AT3G44260
GO:0019319	hexose biosynthetic process	23	-0.404288	-1.0923	0.336788	0.815504	4118	tags=30%, list=20%, signal=24%	AT5G03690/AT3G54050/AT3G55440/AT1G78050/AT5G65690/AT2G20370
GO:0004630	phospholipase D activity	12	-0.487555	-1.1236	0.336898	0.815504	5241	tags=42%, list=26%, signal=31%	AT3G15730/AT3G16785/AT4G11830/AT2G42010
GO:0070290	N-acylphosphatidylethanolamine-specific phospholipase D activity	12	-0.487555	-1.1236	0.336898	0.815504	5241	tags=42%, list=26%, signal=31%	AT3G15730/AT3G16785/AT4G11830/AT2G42010
GO:0046890	regulation of lipid biosynthetic process	48	-0.3469	-1.08362	0.337662	0.81628	4141	tags=29%, list=20%, signal=23%	AT1G64670/AT5G07350/AT4G01900/AT2G45400/AT1G68320/AT4G15400/AT3G26790/AT1G63030/AT3G27785/AT1G20780/AT1G12610/AT1G54540/AT5G61780
GO:0005819	spindle	62	0.29465	1.04981	0.337731	0.81628	6389	tags=44%, list=31%, signal=30%	AT3G49860/AT4G24860/AT1G69400/AT1G49910/AT5G06680/AT1G27920/AT5G18700/AT4G35020/AT4G26760/AT5G57880/AT3G15220/AT3G63130/AT2G35630/AT5G40740/AT5G65930/AT4G09550/AT5G48520/AT5G37680/AT5G67270/AT4G21270/AT3G45850/AT2G28620/AT1G73790/AT2G36200/AT2G37420/AT3G48750/AT3G51290
GO:0051239	regulation of multicellular organismal process	497	0.219256	1.02574	0.33908	0.81628	3488	tags=20%, list=17%, signal=17%	AT2G45680/AT3G21150/AT3G09870/AT4G15248/AT3G18550/AT5G03150/AT1G77110/AT1G60190/AT3G54720/AT5G51870/AT5G46260/AT1G20823/AT2G46410/AT2G35230/AT5G54470/AT2G01830/AT5G22290/AT3G50870/AT5G03680/AT1G06180/AT2G13680/AT2G40530/AT2G40750/AT2G20180/AT1G66700/AT1G31650/AT3G56400/AT2G21320/AT1G49010/AT2G19710/AT1G42550/AT4G34600/AT5G13250/AT5G48170/AT4G25530/AT2G42640/AT1G15570/AT5G38200/AT3G07650/AT2G31650…
GO:0019899	enzyme binding	382	-0.253378	-1.03672	0.339506	0.81628	2463	tags=13%, list=12%, signal=11%	AT3G09260/AT5G63160/AT4G17615/AT4G28480/AT1G72150/AT3G50850/AT2G31305/AT5G50430/AT3G05327/AT5G15930/AT4G32300/AT4G18300/AT1G75840/AT4G15410/AT5G62600/AT1G69840/AT2G30740/AT3G07890/AT5G52580/AT3G02460/AT2G42030/AT1G26270/AT4G28550/AT3G11410/AT5G35750/AT1G04200/AT2G46520/AT2G02870/AT2G34970/AT4G27100/AT4G14368/AT3G60540/AT3G21510/AT2G22890/AT1G19310/AT3G12580/AT4G03510/AT3G27220/AT2G30600/AT2G46370…
GO:0015078	proton transmembrane transporter activity	157	-0.277934	-1.04699	0.339515	0.81628	5174	tags=27%, list=25%, signal=20%	ATMG01170/AT3G15640/AT1G19910/AT4G37830/AT3G05150/AT1G16820/AT4G02620/AT2G43240/AT1G65540/AT2G07698/AT3G51490/ATMG00160/ATCG00470/AT1G52710/AT1G08920/AT2G20780/AT1G05580/AT2G28180/AT1G64170/AT1G71880/AT3G47950/AT5G13450/ATCG00480/ATCG00130/AT1G08930/AT5G23270/AT3G52300/AT3G60330/AT5G41610/AT1G64200/AT3G19930/AT1G08890/AT5G40890/AT3G05155/AT1G11260/AT3G47960/AT1G19450/AT1G75220/AT5G01490/AT4G36670…
GO:0006071	glycerol metabolic process	27	-0.394565	-1.0984	0.339688	0.81628	2389	tags=15%, list=12%, signal=13%	AT3G02040/AT5G41080/AT4G26690
GO:0019400	alditol metabolic process	27	-0.394565	-1.0984	0.339688	0.81628	2389	tags=15%, list=12%, signal=13%	AT3G02040/AT5G41080/AT4G26690
GO:0018208	peptidyl-proline modification	11	0.462096	1.10858	0.339827	0.81628	8689	tags=73%, list=43%, signal=42%	AT1G27120/AT1G74800/AT3G06440/AT2G25300/AT5G62620/AT4G21060/AT4G32120/AT4G25340
GO:0051259	protein complex oligomerization	68	-0.324139	-1.06367	0.34019	0.81628	4552	tags=26%, list=22%, signal=21%	AT5G41330/AT5G55630/AT4G28000/AT4G30940/AT4G04340/AT2G03270/AT2G24240/AT5G51070/AT4G14680/AT1G19580/AT2G42540/AT3G02130/AT5G11670/AT1G64110/AT1G59860/AT3G16690/AT5G52882
GO:0009688	abscisic acid biosynthetic process	16	0.40864	1.07086	0.34023	0.81628	3887	tags=31%, list=19%, signal=25%	AT3G14440/AT1G52340/AT1G67080/AT5G20960/AT1G67856
GO:0043289	apocarotenoid biosynthetic process	16	0.40864	1.07086	0.34023	0.81628	3887	tags=31%, list=19%, signal=25%	AT3G14440/AT1G52340/AT1G67080/AT5G20960/AT1G67856
GO:1902645	tertiary alcohol biosynthetic process	16	0.40864	1.07086	0.34023	0.81628	3887	tags=31%, list=19%, signal=25%	AT3G14440/AT1G52340/AT1G67080/AT5G20960/AT1G67856
GO:0042793	plastid transcription	10	0.460896	1.09239	0.340471	0.81628	9874	tags=90%, list=49%, signal=46%	AT5G67570/AT1G74850/AT1G69200/AT4G13670/AT3G54090/AT2G34640/AT4G20130/AT4G02990/AT5G24314
GO:0034285	response to disaccharide	63	-0.332828	-1.07413	0.341463	0.817685	4717	tags=33%, list=23%, signal=26%	AT3G06850/AT5G08790/AT2G30470/AT2G28190/AT1G04700/AT5G61230/AT2G28900/AT5G57610/AT4G01900/AT4G37220/AT3G49340/AT1G08830/AT4G30850/AT5G45890/AT3G54320/AT3G12700/AT1G61800/AT3G16350/AT5G56840/AT3G16690
GO:1905622	negative regulation of leaf development	15	0.42091	1.09037	0.341629	0.817685	756	tags=20%, list=4%, signal=19%	AT2G45680/AT2G40750/AT3G56400
GO:1901568	fatty acid derivative metabolic process	45	-0.342543	-1.05896	0.341977	0.817685	1924	tags=22%, list=9%, signal=20%	AT5G42650/AT3G49210/AT5G12420/AT1G01120/AT5G52320/AT3G45140/AT3G44550/AT3G56700/AT5G22500
GO:0045861	negative regulation of proteolysis	19	-0.421388	-1.08614	0.342059	0.817685	130	tags=26%, list=1%, signal=26%	AT5G47550/AT1G32740/AT4G16500/AT4G19700
GO:0051204	protein insertion into mitochondrial membrane	10	0.458956	1.08779	0.342612	0.817809	271	tags=10%, list=1%, signal=10%	AT3G27070
GO:0090151	establishment of protein localization to mitochondrial membrane	10	0.458956	1.08779	0.342612	0.817809	271	tags=10%, list=1%, signal=10%	AT3G27070
GO:0070569	uridylyltransferase activity	13	0.440043	1.09843	0.343182	0.817993	6580	tags=54%, list=32%, signal=36%	AT5G22840/AT2G35020/AT3G56040/AT2G45620/AT1G31070/AT5G17310/AT2G39740
GO:0048487	beta-tubulin binding	13	-0.469983	-1.11528	0.343416	0.817993	1238	tags=31%, list=6%, signal=29%	AT4G28000/AT1G64110/AT5G52882
GO:0051260	protein homooligomerization	49	-0.344477	-1.07825	0.344156	0.817993	4552	tags=29%, list=22%, signal=22%	AT5G41330/AT5G55630/AT4G28000/AT4G30940/AT2G03270/AT2G24240/AT1G19580/AT2G42540/AT3G02130/AT5G11670/AT1G64110/AT3G16690/AT5G52882
GO:0016108	tetraterpenoid metabolic process	32	-0.377319	-1.09294	0.344178	0.817993	1992	tags=16%, list=10%, signal=14%	AT3G14530/AT3G29430/AT4G36810/AT1G49530
GO:0016116	carotenoid metabolic process	32	-0.377319	-1.09294	0.344178	0.817993	1992	tags=16%, list=10%, signal=14%	AT3G14530/AT3G29430/AT4G36810/AT1G49530
GO:0001578	microtubule bundle formation	11	-0.497653	-1.11198	0.344444	0.817993	1238	tags=45%, list=6%, signal=43%	AT3G12300/AT4G28000/AT1G64110/AT5G52882
GO:0045493	xylan catabolic process	11	-0.497778	-1.11226	0.344444	0.817993	2174	tags=27%, list=11%, signal=24%	AT4G33820/AT2G14690
GO:0022604	regulation of cell morphogenesis	79	-0.311897	-1.0531	0.344882	0.818436	4603	tags=32%, list=23%, signal=25%	AT1G68910/AT5G44100/AT1G03930/AT1G44120/AT2G32460/AT1G04440/AT3G13670/AT4G28000/AT2G47410/AT5G44610/AT4G32551/AT4G35730/AT2G41630/AT5G57015/AT4G03550/AT4G20260/AT1G64110/AT3G07160/AT1G35670/AT3G02170/AT3G13530/AT5G09890/AT2G36850/AT5G52882
GO:0004683	calmodulin-dependent protein kinase activity	39	-0.361893	-1.08284	0.346218	0.819852	3266	tags=36%, list=16%, signal=30%	AT5G04870/AT1G74740/AT4G04700/AT4G35310/AT1G18890/AT2G17290/AT1G08650/AT5G24430/AT4G23650/AT4G21940/AT3G10660/AT1G12680/AT1G35670
GO:0004525	ribonuclease III activity	11	0.45761	1.09782	0.34632	0.819852	2475	tags=27%, list=12%, signal=24%	AT3G20420/AT1G24450/AT3G13740
GO:0055071	manganese ion homeostasis	11	0.457012	1.09638	0.34632	0.819852	2173	tags=36%, list=11%, signal=32%	AT1G76800/AT2G38170/AT3G51860/AT1G21140
GO:0004312	fatty acid synthase activity	24	-0.398795	-1.09553	0.346484	0.819852	6483	tags=50%, list=32%, signal=34%	AT2G04540/AT1G74960/AT1G68260/AT1G24360/AT1G08510/AT4G34520/AT4G13050/AT1G25450/AT5G43760/AT1G01120/AT4G36830
GO:0016831	carboxy-lyase activity	61	-0.335745	-1.08425	0.346774	0.819945	2621	tags=28%, list=13%, signal=24%	AT3G62830/AT1G27980/AT2G16500/AT5G15950/AT3G02470/AT5G38430/AT4G34710/AT5G57190/AT2G04400/AT2G20340/AT3G17717/AT5G54960/AT3G25570/AT5G11670/AT5G65690/AT4G33070
GO:0015693	magnesium ion transport	10	-0.509056	-1.10769	0.347664	0.821009	5553	tags=60%, list=27%, signal=44%	AT5G11960/AT2G21120/AT1G71900/AT3G23870/AT4G38730
GO:0032434	regulation of proteasomal ubiquitin-dependent protein catabolic process	13	0.438149	1.0937	0.347727	0.821009	7458	tags=54%, list=37%, signal=34%	AT5G18650/AT2G16090/AT1G05890/AT2G31510/AT5G65000/AT3G62970/AT5G63760
GO:0043647	inositol phosphate metabolic process	18	-0.430794	-1.09204	0.348135	0.821377	3083	tags=28%, list=15%, signal=24%	AT5G61760/AT5G16760/AT4G18010/AT4G08170
GO:0031062	positive regulation of histone methylation	11	0.455966	1.09387	0.348485	0.821608	7570	tags=64%, list=37%, signal=40%	AT1G54440/AT1G14350/AT1G77300/AT4G30200/AT2G16390/AT2G42940/AT5G35910
GO:0016889	endodeoxyribonuclease activity, producing 3'-phosphomonoesters	12	0.443123	1.08881	0.349206	0.822715	2856	tags=25%, list=14%, signal=21%	AT2G26840/AT4G30870/AT4G36050
GO:0006754	ATP biosynthetic process	45	-0.341346	-1.05526	0.350081	0.823724	6515	tags=47%, list=32%, signal=32%	AT2G21410/AT1G51650/AT4G39080/AT2G33040/AT3G27240/AT2G07671/ATMG01080/AT3G42640/AT2G07741/ATMG01170/AT3G15640/AT2G07698/ATCG00470/AT1G52710/AT3G47950/AT5G13450/ATCG00480/ATCG00130/AT3G52300/AT3G60330
GO:0046839	phospholipid dephosphorylation	15	0.41514	1.07543	0.350679	0.823724	1970	tags=20%, list=10%, signal=18%	AT2G32010/AT1G05470/AT2G43900
GO:0046856	phosphatidylinositol dephosphorylation	15	0.41514	1.07543	0.350679	0.823724	1970	tags=20%, list=10%, signal=18%	AT2G32010/AT1G05470/AT2G43900
GO:0010150	leaf senescence	94	0.273904	1.04441	0.350725	0.823724	2612	tags=21%, list=13%, signal=19%	AT4G23810/AT4G25580/AT4G30520/AT1G69490/AT2G27420/AT5G12080/AT5G44160/AT2G03740/AT1G20900/AT1G32450/AT3G10500/AT3G21420/AT1G73680/AT4G32940/AT5G03280/AT1G27320/AT3G14067/AT3G52430/AT3G11340/AT2G43000
GO:0015766	disaccharide transport	10	-0.507828	-1.10501	0.351402	0.823724	1653	tags=50%, list=8%, signal=46%	AT5G13170/AT2G02860/AT3G19930/AT4G25010
GO:0015770	sucrose transport	10	-0.507828	-1.10501	0.351402	0.823724	1653	tags=50%, list=8%, signal=46%	AT5G13170/AT2G02860/AT3G19930/AT4G25010
GO:0015772	oligosaccharide transport	10	-0.507828	-1.10501	0.351402	0.823724	1653	tags=50%, list=8%, signal=46%	AT5G13170/AT2G02860/AT3G19930/AT4G25010
GO:0031330	negative regulation of cellular catabolic process	18	-0.430048	-1.09015	0.351687	0.823802	257	tags=44%, list=1%, signal=44%	AT5G19030/AT1G04850/AT4G11910/AT2G04940/AT3G56860/AT2G39780/AT4G24960
GO:0015923	mannosidase activity	16	-0.444928	-1.09454	0.352734	0.824962	1634	tags=19%, list=8%, signal=17%	AT5G66150/AT1G02310
GO:0019902	phosphatase binding	12	-0.479692	-1.10548	0.352941	0.824962	3699	tags=50%, list=18%, signal=41%	AT4G04720/AT5G53000/AT4G33950/AT4G08960/AT2G31305
GO:0019903	protein phosphatase binding	12	-0.479692	-1.10548	0.352941	0.824962	3699	tags=50%, list=18%, signal=41%	AT4G04720/AT5G53000/AT4G33950/AT4G08960/AT2G31305
GO:0002376	immune system process	417	0.222898	1.02212	0.353933	0.826096	3343	tags=20%, list=16%, signal=17%	AT4G23810/AT4G14465/AT5G27420/AT5G38340/AT1G72940/AT4G33710/AT4G14390/AT3G56710/AT3G50930/AT1G69440/AT4G16880/AT1G19320/AT1G14480/AT5G20480/AT5G43810/AT5G22290/AT1G18570/AT5G54610/AT5G26920/AT3G49530/AT3G49860/AT1G05460/AT4G14400/AT1G79030/AT2G27420/AT1G72900/AT3G56400/AT5G61420/AT2G33580/AT4G23170/AT2G19710/AT1G73805/AT1G33560/AT2G14080/AT3G18690/AT1G62510/AT1G42990/AT3G45640/AT1G56520/AT4G03450…
GO:0005777	peroxisome	164	-0.273251	-1.03757	0.353933	0.826096	5762	tags=31%, list=28%, signal=22%	AT3G06690/AT2G32410/AT1G07180/AT3G24170/AT4G05530/AT1G11840/AT2G43020/AT3G25800/AT5G04870/AT5G09660/AT1G69960/AT5G47040/AT2G45690/AT5G11520/AT2G39970/AT5G12390/AT5G44720/AT1G04710/AT2G42520/AT5G62810/AT1G52410/AT3G02360/AT1G47750/AT1G65520/AT1G76150/AT1G66120/AT4G05020/AT4G13280/AT3G58510/AT2G27490/AT4G14880/AT1G52400/AT1G13460/AT3G09260/AT3G59050/AT4G16760/AT1G65890/AT2G22780/AT5G38120/AT5G36880…
GO:0003724	RNA helicase activity	82	0.276751	1.04346	0.354223	0.826184	6009	tags=33%, list=30%, signal=23%	AT1G51380/AT1G05460/AT5G19210/AT4G01020/AT5G63630/AT2G35340/AT4G15850/AT2G45810/AT1G06670/AT2G40700/AT5G08620/AT5G10370/AT3G13920/AT5G26742/AT1G26370/AT2G06990/AT1G59760/AT4G18465/AT4G16630/AT3G06980/AT1G32490/AT2G47250/AT5G39840/AT5G08610/AT2G01440/AT3G22310/AT5G54910
GO:0030243	cellulose metabolic process	66	0.290394	1.04674	0.354667	0.826627	3085	tags=30%, list=15%, signal=26%	AT1G64390/AT1G71380/AT1G05850/AT1G02730/AT5G62710/AT2G21770/AT5G01360/AT5G44030/AT4G11050/AT2G32530/AT1G70710/AT4G23560/AT4G18780/AT1G55850/AT4G39010/AT4G23990/AT4G24000/AT5G17420/AT2G32540/AT1G77460
GO:0044462	external encapsulating structure part	11	-0.493105	-1.10182	0.355556	0.828107	1845	tags=36%, list=9%, signal=33%	AT3G51550/AT2G36100/AT2G27370
GO:0009678	pyrophosphate hydrolysis-driven proton transmembrane transporter activity	55	-0.33827	-1.07449	0.35623	0.828558	7425	tags=55%, list=37%, signal=35%	AT4G38920/ATCG00150/AT3G42050/AT5G57350/AT2G16510/AT5G55290/AT4G11150/AT2G21410/AT4G26710/AT1G15690/AT1G51650/AT4G39080/AT3G28710/AT1G78900/AT2G33040/AT3G28715/AT2G07671/ATMG01080/AT3G42640/AT1G19910/AT1G16820/AT4G02620/AT2G07698/ATCG00470/AT3G47950/AT5G13450/ATCG00480/AT3G60330/AT1G64200
GO:0010193	response to ozone	35	0.330679	1.05935	0.356627	0.828558	1800	tags=14%, list=9%, signal=13%	AT4G23810/AT5G42380/AT5G24110/AT1G15520/AT5G49570
GO:0051346	negative regulation of hydrolase activity	25	-0.395491	-1.09663	0.356655	0.828558	2966	tags=28%, list=15%, signal=24%	AT1G32740/AT4G08960/AT3G50850/AT2G31305/AT4G16500/AT4G19700
GO:0061136	regulation of proteasomal protein catabolic process	14	0.417807	1.06043	0.356818	0.828558	7458	tags=50%, list=37%, signal=32%	AT5G18650/AT2G16090/AT1G05890/AT2G31510/AT5G65000/AT3G62970/AT5G63760
GO:0010345	suberin biosynthetic process	22	-0.409036	-1.09327	0.357019	0.828558	2232	tags=45%, list=11%, signal=41%	AT3G53510/AT5G13580/AT1G64670/AT5G41040/AT3G11430/AT3G44550/AT3G56700/AT5G22500/AT2G40230
GO:0009610	response to symbiotic fungus	13	-0.465769	-1.10528	0.357651	0.829436	2451	tags=31%, list=12%, signal=27%	AT3G50480/AT1G19570/AT3G09940
GO:0008483	transaminase activity	56	-0.334482	-1.06704	0.358974	0.831322	3482	tags=27%, list=17%, signal=22%	AT3G24090/AT5G19550/AT2G22250/AT4G35630/AT1G17290/AT2G38400/AT3G19710/AT4G28410/AT1G18870/AT2G13810/AT1G77670/AT4G23600/AT1G71920/AT2G24850
GO:0016769	transferase activity, transferring nitrogenous groups	56	-0.334482	-1.06704	0.358974	0.831322	3482	tags=27%, list=17%, signal=22%	AT3G24090/AT5G19550/AT2G22250/AT4G35630/AT1G17290/AT2G38400/AT3G19710/AT4G28410/AT1G18870/AT2G13810/AT1G77670/AT4G23600/AT1G71920/AT2G24850
GO:0055028	cortical microtubule	21	0.379858	1.07273	0.359629	0.831777	6427	tags=52%, list=32%, signal=36%	AT3G23090/AT5G06680/AT5G47820/AT4G27060/AT1G77460/AT4G26760/AT5G65930/AT5G28646/AT2G34680/AT3G48750/AT3G44200
GO:0016052	carbohydrate catabolic process	249	-0.264078	-1.04033	0.359788	0.831777	2773	tags=16%, list=14%, signal=14%	AT3G27400/AT1G11580/AT1G69830/AT4G01700/AT2G26440/AT5G64640/AT1G02360/AT3G55440/AT1G53840/AT4G38300/AT1G78050/AT4G19720/AT2G43570/AT5G04310/AT5G20860/AT3G20040/AT4G15980/AT4G19820/AT4G28320/AT4G02320/AT1G53830/AT4G02330/AT1G48930/AT1G23200/AT2G43610/AT4G33820/AT3G57520/AT1G14520/AT5G63240/AT3G49220/AT2G43620/AT4G19810/AT1G02310/AT5G18670/AT3G49160/AT1G50460/AT2G14690/AT2G47550/AT1G65610/AT2G19800
GO:0009812	flavonoid metabolic process	73	-0.312702	-1.0453	0.359937	0.831777	2624	tags=15%, list=13%, signal=13%	AT5G43310/AT4G09820/AT3G11180/AT5G24530/AT3G20940/AT2G27000/AT2G44450/AT1G61100/AT5G05600/AT2G38240
GO:0004190	aspartic-type endopeptidase activity	53	-0.340383	-1.0714	0.360522	0.831777	2296	tags=19%, list=11%, signal=17%	AT1G05820/AT2G29900/AT1G44130/AT2G39710/AT3G12700/AT1G65240/AT3G51350/AT3G52500/AT4G16563
GO:0070001	aspartic-type peptidase activity	53	-0.340383	-1.0714	0.360522	0.831777	2296	tags=19%, list=11%, signal=17%	AT1G05820/AT2G29900/AT1G44130/AT2G39710/AT3G12700/AT1G65240/AT3G51350/AT3G52500/AT4G16563
GO:0008519	ammonium transmembrane transporter activity	10	-0.503791	-1.09623	0.360748	0.831777	10	tags=30%, list=0%, signal=30%	AT2G38290/AT4G13510
GO:0010466	negative regulation of peptidase activity	14	-0.457532	-1.09917	0.36121	0.831777	130	tags=36%, list=1%, signal=36%	AT5G47550/AT1G32740/AT4G16500/AT4G19700
GO:0052547	regulation of peptidase activity	14	-0.457532	-1.09917	0.36121	0.831777	130	tags=36%, list=1%, signal=36%	AT5G47550/AT1G32740/AT4G16500/AT4G19700
GO:0051119	sugar transmembrane transporter activity	60	-0.327963	-1.05597	0.361874	0.832647	2395	tags=18%, list=12%, signal=16%	AT5G23270/AT3G19930/AT1G08890/AT3G05155/AT1G11260/AT1G19450/AT4G25010/AT1G75220/AT3G16690/AT4G36670
GO:0043269	regulation of ion transport	41	-0.35332	-1.06679	0.362098	0.832647	4045	tags=37%, list=20%, signal=29%	AT5G62000/AT4G04340/AT1G02410/AT4G33950/AT2G17290/AT4G23650/AT1G09995/AT4G27500/AT1G01140/AT3G03000/AT1G35670/AT3G11410/AT5G35750/AT5G46330
GO:0044085	cellular component biogenesis	206	0.243427	1.03515	0.364312	0.836651	4330	tags=28%, list=21%, signal=22%	AT1G05510/AT4G33450/AT4G17220/AT3G27660/AT3G44990/AT1G32770/AT3G09160/AT3G61910/AT5G15630/AT1G02730/AT4G25140/AT2G46770/AT1G17950/AT2G36870/AT2G21770/AT5G44030/AT1G75500/AT2G32530/AT1G07070/AT2G40320/AT2G36570/AT2G38080/AT4G18780/AT1G55850/AT5G40420/AT5G61330/AT1G67440/AT4G23990/AT5G12870/AT5G44670/AT4G24000/AT2G15440/AT4G36890/AT5G17420/AT3G50220/AT5G47820/AT3G51270/AT2G34260/AT1G22620/AT5G51730…
GO:0010628	positive regulation of gene expression	355	0.224341	1.01427	0.364532	0.836651	2667	tags=14%, list=13%, signal=12%	AT1G32640/AT4G25490/AT5G61600/AT4G23810/AT5G51870/AT1G73870/AT5G22290/AT1G32770/AT1G46768/AT1G79180/AT3G61910/AT5G50080/AT4G18880/AT5G11470/AT1G55370/AT3G24140/AT1G49010/AT5G44160/AT4G17880/AT5G13250/AT4G28500/AT4G39410/AT5G64910/AT2G46770/AT5G26630/AT1G28470/AT5G48670/AT2G27230/AT4G01540/AT1G64490/AT3G10500/AT2G03710/AT5G47220/AT1G01760/AT2G47460/AT1G04020/AT5G49430/AT2G38340/AT2G22540/AT5G61330…
GO:0009625	response to insect	27	0.354845	1.05665	0.364706	0.836651	2470	tags=30%, list=12%, signal=26%	AT1G18570/AT5G45800/AT5G61420/AT5G07690/AT1G74080/AT3G26830/AT3G52430/AT3G14210
GO:0042180	cellular ketone metabolic process	38	-0.356161	-1.06314	0.364865	0.836651	5600	tags=47%, list=28%, signal=34%	AT1G11840/AT3G24200/AT4G34180/AT4G17650/AT1G67280/AT1G23360/AT1G06130/AT4G01660/AT2G31350/AT5G15910/AT2G30920/AT2G34630/AT1G78510/AT2G43430/AT2G30490/AT1G18870/AT3G55840
GO:0008515	sucrose transmembrane transporter activity	15	-0.445969	-1.08315	0.366071	0.837723	3177	tags=33%, list=16%, signal=28%	AT1G71890/AT3G19930/AT4G25010/AT3G16690
GO:0015112	nitrate transmembrane transporter activity	17	-0.434579	-1.08877	0.366197	0.837723	2845	tags=47%, list=14%, signal=41%	AT5G50200/AT5G40890/AT1G12110/AT1G08090/AT4G21680/AT3G45060/AT3G27170
GO:0016168	chlorophyll binding	35	0.329545	1.05571	0.366265	0.837723	6746	tags=40%, list=33%, signal=27%	AT2G34420/AT2G05070/AT5G54270/AT1G29920/AT1G19150/AT3G08940/AT1G29910/AT1G61520/AT2G21970/AT4G10340/AT3G47470/AT3G27690/AT2G34430/AT5G02120
GO:0010540	basipetal auxin transport	17	0.395195	1.0428	0.366359	0.837723	4841	tags=53%, list=24%, signal=40%	AT1G77110/AT5G40030/AT3G27580/AT1G02520/AT3G28860/AT1G13980/AT5G55540/AT5G13750/AT4G30960
GO:0048438	floral whorl development	18	0.393747	1.05341	0.366743	0.837851	1959	tags=22%, list=10%, signal=20%	AT3G57670/AT5G03680/AT5G20450/AT2G22540
GO:0045859	regulation of protein kinase activity	82	-0.305497	-1.03926	0.366929	0.837851	2040	tags=13%, list=10%, signal=12%	AT5G23600/AT3G07980/AT3G19150/AT1G53570/AT3G13530/AT1G07150/AT5G67080/AT4G26890/AT2G32510/AT5G55090
GO:0016811	hydrolase activity, acting on carbon-nitrogen (but not peptide) bonds, in linear amides	49	0.307242	1.0527	0.367876	0.839204	3981	tags=20%, list=20%, signal=16%	AT1G25054/AT5G05480/AT4G37560/AT5G49570/AT3G14920/AT2G14825/AT4G37550/AT2G36720/AT1G07380/AT3G58130
GO:0071281	cellular response to iron ion	32	0.334442	1.0472	0.368421	0.839204	3375	tags=28%, list=17%, signal=23%	AT1G76800/AT5G04950/AT4G11280/AT2G42640/AT5G03280/AT1G21140/AT3G08040/AT3G53280/AT1G49820
GO:0016634	oxidoreductase activity, acting on the CH-CH group of donors, oxygen as acceptor	11	-0.485888	-1.08569	0.368519	0.839204	7434	tags=73%, list=37%, signal=46%	AT4G01690/AT5G14220/AT5G63290/AT1G06290/AT4G03205/AT3G06690/AT4G16760
GO:0006475	internal protein amino acid acetylation	37	0.326802	1.05534	0.36855	0.839204	5289	tags=27%, list=26%, signal=20%	AT5G36740/AT5G36670/AT1G05380/AT1G54840/AT1G18335/AT3G24870/AT4G18470/AT2G18000/AT4G14920/AT3G24880
GO:0009084	glutamine family amino acid biosynthetic process	28	0.351984	1.05829	0.369159	0.840004	6515	tags=46%, list=32%, signal=32%	AT2G39800/AT1G52340/AT2G43000/AT2G41220/AT5G53460/AT4G37670/AT5G16570/AT1G79900/AT1G29900/AT5G46180/AT5G14800/AT3G17820/AT5G37600
GO:0061024	membrane organization	148	-0.275718	-1.03223	0.370213	0.840419	5288	tags=28%, list=26%, signal=21%	AT5G61210/AT1G65260/AT5G26980/AT2G33110/AT1G13900/AT5G46860/AT5G39510/AT1G65540/AT3G09740/AT5G50440/AT1G16240/AT5G08080/AT5G25250/AT4G28000/AT1G20110/AT1G28490/AT3G13900/AT1G79590/AT5G13490/AT3G17440/AT4G32150/AT4G29160/AT5G16830/AT3G24350/AT3G21660/AT5G52990/AT4G02195/AT2G33120/AT5G56450/AT1G04070/AT1G11890/AT4G15410/AT2G42540/AT1G22180/AT1G64110/AT2G31690/AT5G09260/AT4G17470/AT1G59820/AT4G31780…
GO:0035601	protein deacylation	26	-0.386481	-1.07564	0.370307	0.840419	3224	tags=27%, list=16%, signal=23%	AT1G70060/AT4G22305/AT4G17480/AT5G47330/AT4G17470/AT2G46040
GO:0098732	macromolecule deacylation	26	-0.386481	-1.07564	0.370307	0.840419	3224	tags=27%, list=16%, signal=23%	AT1G70060/AT4G22305/AT4G17480/AT5G47330/AT4G17470/AT2G46040
GO:0009403	toxin biosynthetic process	19	0.385759	1.05123	0.370629	0.840419	3039	tags=32%, list=15%, signal=27%	AT2G38470/AT4G27260/AT3G45640/AT3G26830/AT2G43000/AT3G03900
GO:0048825	cotyledon development	19	0.38491	1.04891	0.370629	0.840419	1971	tags=21%, list=10%, signal=19%	AT2G34650/AT1G73590/AT2G46310/AT5G59340
GO:0009683	indoleacetic acid metabolic process	13	-0.460014	-1.09162	0.371886	0.842684	5270	tags=69%, list=26%, signal=51%	AT3G44300/AT2G20610/AT5G54810/AT1G16400/AT4G31500/AT1G16410/AT2G22330/AT4G28410
GO:1903313	positive regulation of mRNA metabolic process	29	0.346195	1.05332	0.372365	0.843184	4904	tags=34%, list=24%, signal=26%	AT2G35430/AT1G01760/AT1G66810/AT5G22840/AT3G13060/AT3G12680/AT5G61020/AT1G09810/AT1G55500/AT1G02080
GO:0009862	systemic acquired resistance, salicylic acid mediated signaling pathway	13	0.430637	1.07495	0.372727	0.843418	3847	tags=46%, list=19%, signal=37%	AT3G56400/AT4G16892/AT3G52430/AT5G48490/AT5G06950/AT1G22070
GO:0006672	ceramide metabolic process	13	-0.457608	-1.08591	0.373665	0.84437	3705	tags=31%, list=18%, signal=25%	AT1G13580/AT5G49900/AT1G26200
GO:0052716	hydroquinone:oxygen oxidoreductase activity	14	-0.454162	-1.09107	0.373665	0.84437	280	tags=21%, list=1%, signal=21%	AT5G01040/AT5G01050
GO:0004551	nucleotide diphosphatase activity	18	-0.422648	-1.07139	0.374778	0.845721	515	tags=22%, list=3%, signal=22%	AT5G47650/AT1G68760/AT4G29690
GO:0008654	phospholipid biosynthetic process	130	-0.281784	-1.03552	0.375	0.845721	3183	tags=18%, list=16%, signal=15%	AT1G13560/AT4G34310/AT3G16785/AT2G39445/AT1G32200/AT1G01610/AT4G22305/AT1G06520/AT4G15130/AT5G57190/AT1G17340/AT1G24793/AT3G11430/AT3G14205/AT3G14530/AT1G74340/AT3G45040/AT3G29430/AT1G61280/AT4G36810/AT1G49530/AT5G27200
GO:1901701	cellular response to oxygen-containing compound	159	-0.27211	-1.02563	0.375714	0.845721	3938	tags=27%, list=19%, signal=22%	AT5G54060/AT5G12140/AT3G25190/AT1G29395/AT2G32400/AT2G19590/AT2G15970/AT3G20660/AT1G05010/AT3G53480/AT5G19820/AT4G03460/AT3G60320/AT3G59410/AT1G34190/AT5G28770/AT5G18610/AT5G19000/AT1G08830/AT5G41790/AT1G12240/AT1G12820/AT2G41230/AT3G07360/AT2G32800/AT5G11210/AT5G46350/AT2G29120/AT3G15356/AT4G20260/AT5G60300/AT1G08090/AT5G35750/AT1G62660/AT5G10720/AT5G67490/AT4G36830/AT3G03990/AT1G22810/AT3G45060…
GO:1901606	alpha-amino acid catabolic process	61	-0.325596	-1.05147	0.375806	0.845721	3902	tags=25%, list=19%, signal=20%	AT2G37040/AT1G79440/AT4G26910/AT5G55070/AT1G17290/AT2G03800/AT2G22330/AT5G43430/AT4G34710/AT3G53260/AT2G20340/AT3G55840/AT3G30775/AT5G38710
[truncated: 1,815 more rows]

## Sheet: GSEA_KEGG pathways
Supplementary Data S5. GSEA analysis based on KEGG pathways
[truncated: 232 more rows]
