# Supplementary material for: Molecular Targets and Biological Functions of cAMP Signaling in Arabidopsis
Source: Biomolecules. 2021 May 3;11(5):688. doi: 10.3390/biom11050688 (PMC8147800; doi:10.3390/biom11050688)
Supplement: Supplementary file 1 [file biomolecules-11-00688-s001.zip › Supplementary Data S6.xlsx]

## Sheet: chocolate1
Supplementary Data S6. Functional annotation of the co-expression module “chocolate1” derived from WGCNA (GO terms and KEGG pathways using DAVID)
Category	Term	Count	%	PValue	Genes	List Total	Pop Hits	Pop Total	Fold Enrichment	Benjamini
GOTERM_BP_DIRECT	GO:0006355~regulation of transcription, DNA-templated	339	11.6455	9.11624e-13	AT4G39780, AT3G53680, AT3G24440, AT3G19860, AT5G06770, AT1G06850, AT5G62430, AT2G22770, AT5G57710, AT2G44745, AT5G28770, AT3G16350, AT5G40220, AT1G69490, AT1G63470, AT4G23810, AT1G17520, AT2G45460, AT1G31310, AT1G43160, AT3G13810, AT4G36730, AT5G58900, AT3G24010, AT2G47460, AT1G10170, AT5G07690, AT2G31210, AT2G33310, AT4G31120, AT1G78930, AT4G25210, AT2G18300, AT1G80840, AT5G53290, AT5G51790, AT5…	2069	2119	18499	1.4304	1.38564e-09
GOTERM_BP_DIRECT	GO:0009873~ethylene-activated signaling pathway	51	1.75198	5.06253e-10	AT4G39780, AT1G03800, AT1G75950, AT5G67000, AT5G25350, AT5G25190, AT5G64750, AT5G67180, AT3G51770, AT3G15730, AT3G23240, AT1G43160, AT2G23340, AT5G59430, AT3G20770, AT2G44840, AT3G51550, AT4G36900, AT2G20880, AT1G78080, AT5G53290, AT1G19210, AT5G07580, AT1G64380, AT2G44940, AT1G13260, AT2G41710, AT5G67190, AT4G06746, AT3G25730, AT4G16110, AT1G22810, AT4G32800, AT4G19040, AT2G25490, AT5G61590, AT3…	2069	179	18499	2.54745	3.84752e-07
GOTERM_BP_DIRECT	GO:0009611~response to wounding	53	1.82068	3.01482e-09	AT5G63770, AT1G18150, AT3G48520, AT3G19710, AT4G39980, AT5G13220, AT5G22500, AT1G76690, AT2G34600, AT5G52310, AT1G43160, AT2G02220, AT5G67480, AT5G07690, AT3G44550, AT1G78080, AT1G80840, AT5G53750, AT5G54170, AT5G60300, AT4G32551, AT1G74950, AT1G67560, AT3G53260, AT4G08500, AT1G01470, AT4G11280, AT4G23600, AT1G53165, AT2G38870, AT2G20340, AT1G79380, AT1G01140, AT4G24220, AT5G63970, AT3G17860, AT3…	2069	199	18499	2.38128	1.52751e-06
GOTERM_BP_DIRECT	GO:0006351~transcription, DNA-templated	290	9.96221	4.54074e-09	AT4G39780, AT3G24440, AT3G19860, AT2G22630, AT5G62430, AT2G22770, AT5G57710, AT2G44745, AT5G28770, AT3G16350, AT5G40220, AT1G69490, AT1G63470, AT4G23810, AT1G17520, AT1G43160, AT5G60890, AT3G13810, AT4G36730, AT5G58900, AT3G24010, AT2G47460, AT5G07690, AT2G31210, AT2G33310, AT4G31120, AT2G18300, AT1G80840, AT5G53290, AT5G51790, AT5G07580, AT1G49950, AT3G57660, AT1G64380, AT3G54130, AT3G23210, AT1…	2069	1886	18499	1.37481	1.72548e-06
GOTERM_BP_DIRECT	GO:0010200~response to chitin	37	1.27104	3.05739e-07	AT3G50060, AT4G30370, AT3G21150, AT3G52450, AT4G23810, AT4G31800, AT1G51700, AT5G47610, AT2G34600, AT5G49520, AT4G17245, AT5G59450, AT2G46400, AT5G67300, AT2G38470, AT3G50260, AT4G11660, AT5G01830, AT1G23030, AT3G46600, AT4G28140, AT2G35000, AT2G44840, AT2G40140, AT5G64660, AT1G80840, AT5G47230, AT3G15210, AT4G01250, AT1G64380, AT3G18710, AT3G53600, AT4G35480, AT4G23550, AT4G17490, AT3G49530, AT4…	2069	133	18499	2.48736	9.29404e-05
GOTERM_BP_DIRECT	GO:0010411~xyloglucan metabolic process	18	0.618344	1.01516e-06	AT4G37800, AT2G01850, AT5G57550, AT4G30280, AT5G57560, AT1G74380, AT2G06850, AT3G23730, AT4G03210, AT3G62720, AT1G10550, AT4G30270, AT4G25810, AT1G18690, AT1G14720, AT3G06550, AT1G70230, AT4G30290	2069	42	18499	3.83187	0.000257142
GOTERM_BP_DIRECT	GO:0009753~response to jasmonic acid	39	1.33975	2.52236e-06	AT5G52660, AT4G01280, AT3G46590, AT4G11280, AT1G18150, AT4G23600, AT3G16350, AT4G14110, AT4G35890, AT1G49010, AT5G61420, AT5G13220, AT1G17520, AT2G34600, AT1G43160, AT5G60890, AT5G67300, AT1G44350, AT5G59430, AT4G05100, AT5G67480, AT3G51450, AT5G07690, AT2G39030, AT1G17420, AT5G59090, AT2G39940, AT1G13960, AT1G18570, AT4G34710, AT1G49950, AT4G20860, AT1G72450, AT1G18710, AT1G74950, AT1G06180, AT1…	2069	156	18499	2.23526	0.000547562
GOTERM_BP_DIRECT	GO:0009409~response to cold	61	2.0955	4.58378e-06	AT1G20450, AT3G17390, AT5G63770, AT3G24440, AT5G15960, AT2G22300, AT3G21300, AT5G63320, AT1G01120, AT5G52310, AT3G11170, AT2G38750, AT1G43160, AT3G50970, AT3G03050, AT1G78080, AT5G57560, AT5G15970, AT1G07720, AT3G23000, AT5G15090, AT3G48750, AT2G38760, AT3G47520, AT2G26640, AT4G25490, AT3G25770, AT5G43760, AT4G08500, AT5G54470, AT5G16910, AT5G44610, AT1G50460, AT5G54590, AT2G03440, AT2G16500, AT1…	2069	299	18499	1.82409	0.000870541
GOTERM_BP_DIRECT	GO:0016567~protein ubiquitination	81	2.78255	2.75393e-05	AT5G18340, AT3G59940, AT1G75950, AT5G39550, AT3G52450, AT3G10910, AT1G76260, AT4G02740, AT5G25350, AT4G19700, AT2G23140, AT2G28840, AT5G63160, AT3G18773, AT2G22010, AT5G47610, AT3G51770, AT4G08980, AT2G17450, AT5G01830, AT1G23030, AT1G10170, AT3G19910, AT1G55270, AT2G35000, AT5G64660, AT1G56610, AT1G72220, AT5G52120, AT1G27910, AT4G15840, AT5G57900, AT3G54790, AT5G64920, AT3G18710, AT5G61560, AT1…	2069	456	18499	1.58821	0.00464034
GOTERM_BP_DIRECT	GO:0009739~response to gibberellin	26	0.893164	6.67053e-05	AT5G52660, AT5G44610, AT3G46590, AT4G01280, AT3G16350, AT3G47620, AT1G49010, AT1G14920, AT4G19700, AT2G31730, AT5G61420, AT4G30270, AT4G23060, AT5G67300, AT5G59430, AT5G67480, AT5G07690, AT5G17490, AT1G74660, AT1G18570, AT1G49950, AT1G66350, AT1G06180, AT5G66350, AT5G52830, AT2G14900	2069	99	18499	2.34815	0.00917542
GOTERM_BP_DIRECT	GO:0042546~cell wall biogenesis	19	0.652697	6.28092e-05	AT4G37800, AT2G01850, AT5G57550, AT4G30280, AT1G06400, AT5G57560, AT5G61840, AT2G06850, AT3G23730, AT4G03210, AT1G10550, AT4G30270, AT5G45750, AT4G25810, AT3G15060, AT2G33570, AT1G14720, AT3G01640, AT4G30290	2069	60	18499	2.83133	0.00950187
GOTERM_BP_DIRECT	GO:0009414~response to water deprivation	54	1.85503	7.56755e-05	AT1G20450, AT1G58440, AT5G15960, AT3G52450, AT5G27620, AT1G52890, AT4G02200, AT5G52310, AT5G67300, AT1G43160, AT2G38750, AT4G15910, AT3G50970, AT5G07690, AT2G37180, AT1G78080, AT2G38530, AT5G15970, AT1G12610, AT5G38710, AT4G32551, AT2G33590, AT2G38760, AT3G30775, AT4G25490, AT1G19120, AT4G39130, AT1G52340, AT1G33560, AT3G15500, AT1G56600, AT2G17840, AT1G76080, AT2G33700, AT3G45930, AT2G41430, AT5…	2069	279	18499	1.73052	0.00954013
GOTERM_BP_DIRECT	GO:0009737~response to abscisic acid	70	2.40467	9.95357e-05	AT1G20450, AT5G15960, AT4G01280, AT3G46590, AT2G46270, AT5G63320, AT3G58490, AT5G64750, AT1G59610, AT4G17260, AT5G45820, AT3G15730, AT5G62000, AT5G52310, AT2G38750, AT1G43160, AT5G67300, AT3G06550, AT4G15910, AT4G08980, AT4G05100, AT3G50970, AT2G26980, AT3G08550, AT5G20635, AT5G15970, AT5G23720, AT1G29395, AT3G02880, AT1G49950, AT3G63210, AT1G24120, AT2G33590, AT4G39130, AT3G09770, AT5G44610, AT5…	2069	394	18499	1.58851	0.0115711
GOTERM_BP_DIRECT	GO:0009723~response to ethylene	29	0.996221	0.000205322	AT5G52660, AT3G50060, AT3G46590, AT4G11280, AT4G01280, AT2G38210, AT3G16350, AT5G25350, AT4G19040, AT2G31730, AT1G14920, AT1G17520, AT2G25490, AT5G67300, AT5G59430, AT3G20770, AT4G05100, AT2G47460, AT3G51450, AT3G51550, AT5G17490, AT3G15210, AT1G74660, AT1G13960, AT1G18570, AT1G49950, AT1G68120, AT1G66350, AT4G16110	2069	124	18499	2.09105	0.0205931
GOTERM_BP_DIRECT	GO:0031347~regulation of defense response	19	0.652697	0.000195987	AT1G80840, AT3G07780, AT3G47620, AT2G25000, AT4G19700, AT4G31800, AT4G23810, AT3G02150, AT4G03460, AT2G34600, AT1G72450, AT1G74950, AT4G08480, AT3G12920, AT3G17860, AT2G02220, AT1G70700, AT3G22275, AT4G39050	2069	65	18499	2.61353	0.0210558
GOTERM_BP_DIRECT	GO:0006470~protein dephosphorylation	25	0.858811	0.000346433	AT1G67820, AT5G27930, AT1G09160, AT2G35680, AT3G12620, AT2G46920, AT1G68410, AT2G28890, AT2G33700, AT3G11410, AT4G26080, AT5G43380, AT5G02400, AT5G36250, AT5G23720, AT1G47380, AT5G59160, AT1G43900, AT2G42810, AT2G30020, AT3G62260, AT1G07630, AT5G19280, AT5G46410, AT3G06110	2069	103	18499	2.17015	0.032381
GOTERM_BP_DIRECT	GO:0009738~abscisic acid-activated signaling pathway	38	1.30539	0.000877806	AT5G01810, AT1G69260, AT3G06380, AT1G62660, AT1G76260, AT5G63320, AT2G03440, AT1G48590, AT4G35890, AT5G64750, AT3G15730, AT5G67300, AT4G26080, AT3G11410, AT5G46845, AT5G05440, AT3G18040, AT2G38310, AT3G07360, AT2G40330, AT5G52900, AT1G69270, AT1G12240, AT2G26980, AT3G51550, AT1G08650, AT2G22660, AT3G08550, AT1G49540, AT1G02340, AT5G23720, AT4G18010, AT4G33950, AT5G10720, AT1G70790, AT4G17870, AT2…	2069	195	18499	1.74236	0.0755171
GOTERM_BP_DIRECT	GO:0006402~mRNA catabolic process	8	0.27482	0.000988996	AT3G20800, AT2G32550, AT1G77680, AT5G14580, AT1G03457, AT5G61780, AT4G03110, AT5G12980	2069	16	18499	4.47052	0.080161
GOTERM_BP_DIRECT	GO:0009741~response to brassinosteroid	11	0.377877	0.00312554	AT1G13260, AT3G51550, AT4G08950, AT5G39860, AT5G57560, AT2G37380, AT1G74660, AT5G04240, AT5G54380, AT4G30270, AT3G16570	2069	34	18499	2.89269	0.221538
GOTERM_BP_DIRECT	GO:0009733~response to auxin	49	1.68327	0.0035078	AT4G29940, AT1G06400, AT3G04730, AT4G01280, AT3G16350, AT1G48690, AT3G59900, AT1G49010, AT5G63160, AT5G13220, AT1G17520, AT5G67300, AT5G59430, AT1G79130, AT1G04240, AT5G67480, AT2G47460, AT4G36110, AT2G17500, AT2G33310, AT5G57560, AT5G20820, AT4G12410, AT1G72430, AT1G56150, AT1G49950, AT4G32551, AT2G14960, AT1G08030, AT4G11280, AT2G06850, AT4G29080, AT3G12955, AT4G32280, AT1G20470, AT2G45210, AT4…	2069	290	18499	1.51073	0.234374
GOTERM_BP_DIRECT	GO:0009751~response to salicylic acid	30	1.03057	0.00369822	AT5G52660, AT3G50060, AT3G46590, AT4G01280, AT4G19040, AT1G49010, AT4G35890, AT5G61420, AT4G23810, AT4G31800, AT5G63160, AT5G13220, AT1G17520, AT1G43160, AT5G67300, AT5G59430, AT2G29420, AT5G67480, AT3G51450, AT5G07690, AT1G80840, AT1G13960, AT1G18570, AT2G25000, AT1G49950, AT2G17520, AT5G24110, AT1G06180, AT1G74430, AT1G76680	2069	155	18499	1.73052	0.235227
GOTERM_BP_DIRECT	GO:0009651~response to salt stress	74	2.54208	0.00477446	AT1G11910, AT4G34110, AT5G14200, AT4G01280, AT3G16350, AT5G63320, AT1G49010, AT5G22500, AT4G17260, AT1G17520, AT2G33540, AT5G52310, AT2G38750, AT1G43160, AT5G67300, AT5G59430, AT4G05100, AT5G67480, AT2G47460, AT1G10170, AT5G38940, AT3G44550, AT5G60920, AT2G20880, AT1G78080, AT1G12610, AT1G49950, AT5G28510, AT5G27150, AT2G38760, AT1G06180, AT1G27760, AT4G08500, AT5G44610, AT5G52660, AT1G50460, AT1…	2069	484	18499	1.36702	0.281552
GOTERM_BP_DIRECT	GO:0010150~leaf senescence	20	0.687049	0.00580318	AT4G03550, AT5G17290, AT5G44610, AT1G20780, AT1G70530, AT1G73680, AT2G22300, AT4G01250, AT1G69490, AT4G35890, AT4G30920, AT2G42540, AT4G23810, AT5G52310, AT5G62000, AT3G10500, AT2G39200, AT1G76680, AT5G12080, AT4G16110	2069	92	18499	1.9437	0.319299
GOTERM_BP_DIRECT	GO:0061512~protein localization to cilium	6	0.206115	0.00699918	AT5G18680, AT3G06380, AT3G19990, AT1G53320, AT1G76900, AT1G47270	2069	12	18499	4.47052	0.347567
GOTERM_BP_DIRECT	GO:0045489~pectin biosynthetic process	10	0.343525	0.0068681	AT2G33570, AT5G47780, AT1G24170, AT3G61130, AT3G01040, AT3G50760, AT4G02130, AT3G25140, AT5G06700, AT3G58790	2069	32	18499	2.79407	0.353693
GOTERM_BP_DIRECT	GO:0006970~response to osmotic stress	24	0.824459	0.00824693	AT2G37180, AT1G50460, AT2G22660, AT3G16690, AT1G78080, AT5G15960, AT5G15970, AT1G20440, AT4G04340, AT1G43700, AT4G33950, AT2G42580, AT5G38710, AT4G34710, AT2G42540, AT5G64750, AT3G43700, AT5G52310, AT2G38750, AT1G43160, AT3G58620, AT2G38470, AT5G53060, AT4G08500	2069	122	18499	1.75889	0.383765
GOTERM_BP_DIRECT	GO:0009416~response to light stimulus	33	1.13363	0.0101567	AT1G17060, AT4G14110, AT3G19710, AT1G01120, AT1G20090, AT4G38740, AT2G29650, AT5G57660, AT2G17260, AT2G32400, AT3G08550, AT3G19850, AT1G08650, AT1G78080, AT3G02570, AT4G35290, AT5G59990, AT1G07720, AT1G70940, AT5G15850, AT5G56860, AT2G42540, AT2G47860, AT2G16280, AT5G11060, AT4G03400, AT5G48800, AT1G67900, AT2G26640, AT5G61270, AT3G15570, AT5G43760, AT4G26150	2069	188	18499	1.56944	0.437132
GOTERM_BP_DIRECT	GO:0010468~regulation of gene expression	18	0.618344	0.0135135	AT1G08030, AT3G14230, AT3G07780, AT2G15560, AT5G23720, AT1G52740, AT4G28490, AT5G61380, AT5G56860, AT5G48160, AT3G46640, AT2G20950, AT1G54270, AT2G20960, AT5G53060, AT4G16630, AT4G26150, AT2G16900	2069	86	18499	1.87138	0.509888
GOTERM_BP_DIRECT	GO:1903507~negative regulation of nucleic acid-templated transcription	6	0.206115	0.014625	AT1G72450, AT2G34600, AT1G74950, AT3G17860, AT1G70700, AT5G13220	2069	14	18499	3.83187	0.51441
GOTERM_BP_DIRECT	GO:0071555~cell wall organization	49	1.68327	0.0153091	AT2G01850, AT5G57550, AT4G24510, AT5G45280, AT4G36890, AT3G07160, AT2G06850, AT3G50760, AT3G02230, AT4G30270, AT3G59850, AT3G62110, AT3G61130, AT3G28180, AT1G23480, AT5G15650, AT4G30290, AT4G37800, AT3G59100, AT3G03050, AT4G30280, AT5G47780, AT5G57560, AT5G61840, AT3G23730, AT4G03210, AT1G60590, AT4G24010, AT3G09410, AT4G02130, AT1G80170, AT4G25810, AT1G08200, AT4G13340, AT3G62060, AT1G62440, AT2…	2069	314	18499	1.39526	0.51944
GOTERM_BP_DIRECT	GO:2000022~regulation of jasmonic acid mediated signaling pathway	8	0.27482	0.0134348	AT1G72450, AT2G34600, AT5G67300, AT1G74950, AT3G17860, AT3G22275, AT1G70700, AT5G13220	2069	24	18499	2.98034	0.520141
GOTERM_BP_DIRECT	GO:0006633~fatty acid biosynthetic process	24	0.824459	0.014496	AT2G34770, AT1G14290, AT1G17420, AT2G46720, AT1G73680, AT1G19440, AT4G12110, AT1G07720, AT4G16360, AT2G16280, AT1G01120, AT3G16170, AT1G76690, AT3G11170, AT1G74960, AT1G67560, AT2G26640, AT5G43760, AT2G06050, AT4G23850, AT1G79750, AT1G76680, AT2G38040, AT5G16390	2069	128	18499	1.67644	0.522808
GOTERM_BP_DIRECT	GO:0009695~jasmonic acid biosynthetic process	8	0.27482	0.0168999	AT1G76690, AT1G17420, AT1G67560, AT1G05800, AT3G25770, AT2G06050, AT3G25760, AT1G76680	2069	25	18499	2.86113	0.543914
GOTERM_BP_DIRECT	GO:0071712~ER-associated misfolded protein catabolic process	5	0.171762	0.018779	AT2G42030, AT1G19310, AT4G28270, AT1G74990, AT4G27470	2069	10	18499	4.47052	0.571522
GOTERM_BP_DIRECT	GO:0010629~negative regulation of gene expression	6	0.206115	0.0199556	AT4G00250, AT1G01260, AT3G10040, AT4G36730, AT4G08980, AT5G61380	2069	15	18499	3.57641	0.583308
GOTERM_BP_DIRECT	GO:0009631~cold acclimation	12	0.412229	0.023263	AT1G20450, AT1G74960, AT5G54590, AT5G15960, AT4G25490, AT1G20440, AT1G19120, AT1G29395, AT3G50970, AT4G39130, AT4G08500, AT2G42540	2069	51	18499	2.10377	0.629841
GOTERM_BP_DIRECT	GO:0010187~negative regulation of seed germination	7	0.240467	0.0239352	AT5G17490, AT1G66350, AT2G20180, AT4G26150, AT1G14920, AT5G56860, AT5G02500	2069	21	18499	2.98034	0.630366
GOTERM_BP_DIRECT	GO:0071472~cellular response to salt stress	9	0.309172	0.0259523	AT1G53210, AT1G16370, AT3G43700, AT2G32010, AT5G57630, AT4G20260, AT1G78080, AT3G45680, AT2G21410	2069	33	18499	2.43846	0.63183
GOTERM_BP_DIRECT	GO:0009867~jasmonic acid mediated signaling pathway	12	0.412229	0.0266198	AT5G17490, AT2G39940, AT1G66350, AT3G23240, AT5G63970, AT3G15500, AT3G17860, AT3G22275, AT5G53060, AT1G79380, AT1G14920, AT5G40350	2069	52	18499	2.06332	0.632214
GOTERM_BP_DIRECT	GO:0009788~negative regulation of abscisic acid-activated signaling pathway	10	0.343525	0.0254615	AT5G01810, AT3G51550, AT2G33540, AT4G26080, AT3G11410, AT1G76260, AT5G41560, AT5G10720, AT3G02140, AT5G64750	2069	39	18499	2.29257	0.634028
GOTERM_BP_DIRECT	GO:0006811~ion transport	13	0.446582	0.0248896	AT1G16370, AT1G20780, AT1G11960, AT4G27970, AT4G35870, AT3G01100, AT1G10090, AT1G30360, AT4G15430, AT1G19450, AT1G62320, AT5G23980, AT1G69450	2069	58	18499	2.00402	0.635118
GOTERM_BP_DIRECT	GO:0016051~carbohydrate biosynthetic process	11	0.377877	0.0324287	AT5G15050, AT5G47780, AT1G24170, AT3G61130, AT3G01040, AT3G50760, AT1G03520, AT4G02130, AT1G56600, AT3G25140, AT3G58790	2069	47	18499	2.09258	0.663554
GOTERM_BP_DIRECT	GO:0031338~regulation of vesicle fusion	7	0.240467	0.0298823	AT3G59570, AT3G07890, AT4G27100, AT5G52580, AT5G15930, AT5G41940, AT4G29950	2069	22	18499	2.84487	0.666444
GOTERM_BP_DIRECT	GO:0009098~leucine biosynthetic process	7	0.240467	0.0298823	AT1G18500, AT5G14200, AT5G65780, AT3G05190, AT4G13430, AT3G19710, AT3G49680	2069	22	18499	2.84487	0.666444
GOTERM_BP_DIRECT	GO:0009734~auxin-activated signaling pathway	31	1.06493	0.0323966	AT1G75950, AT3G04730, AT5G46700, AT4G29080, AT4G32280, AT2G45210, AT5G62000, AT4G28640, AT2G01420, AT1G79130, AT5G46845, AT1G04240, AT3G23030, AT1G52830, AT3G27580, AT5G12440, AT1G29510, AT1G51950, AT5G18020, AT2G33310, AT2G17500, AT4G26610, AT1G04550, AT2G42580, AT1G70940, AT1G56150, AT3G54010, AT1G12110, AT5G66350, AT5G12050, AT4G38850	2069	190	18499	1.4588	0.671232
GOTERM_BP_DIRECT	GO:0055085~transmembrane transport	34	1.16798	0.0310305	AT3G17650, AT1G48370, AT1G70610, AT4G32400, AT3G20240, AT3G51870, AT5G49990, AT2G01420, AT5G39040, AT2G29650, AT3G62150, AT5G24030, AT5G61810, AT5G12080, AT3G13080, AT3G14810, AT1G16370, AT5G17850, AT2G17500, AT1G02520, AT4G27970, AT2G39480, AT1G70940, AT2G26510, AT2G35800, AT3G47420, AT1G78610, AT2G34355, AT5G13490, AT5G15090, AT2G30160, AT1G20860, AT4G24570, AT2G34350	2069	212	18499	1.43394	0.671845
GOTERM_BP_DIRECT	GO:0007275~multicellular organism development	56	1.92374	0.0322229	AT1G75950, AT1G77450, AT4G14110, AT1G69490, AT2G46920, AT3G59900, AT1G55940, AT1G52890, AT5G67180, AT4G15310, AT5G56620, AT2G33540, AT5G17520, AT1G79130, AT4G34430, AT3G04240, AT1G56150, AT1G66660, AT2G41710, AT1G62440, AT1G73965, AT3G15500, AT2G46770, AT2G26580, AT5G59305, AT1G23550, AT4G28190, AT1G14920, AT4G16370, AT2G22860, AT3G04850, AT3G20800, AT5G62520, AT2G45210, AT1G10480, AT1G28470, AT3…	2069	384	18499	1.3039	0.677446
GOTERM_BP_DIRECT	GO:0015774~polysaccharide transport	3	0.103057	0.0346843	AT5G65020, AT4G30260, AT2G18840	2069	3	18499	8.94103	0.680699
GOTERM_BP_DIRECT	GO:0010289~homogalacturonan biosynthetic process	3	0.103057	0.0346843	AT1G78240, AT3G61130, AT3G25140	2069	3	18499	8.94103	0.680699
GOTERM_BP_DIRECT	GO:0042335~cuticle development	8	0.27482	0.0370155	AT1G19440, AT2G46720, AT4G34100, AT3G43720, AT2G33510, AT1G27950, AT2G16280, AT1G01120	2069	29	18499	2.46649	0.689642
GOTERM_BP_DIRECT	GO:0009415~response to water	5	0.171762	0.0369142	AT1G20450, AT1G20440, AT5G20520, AT3G50970, AT4G39130	2069	12	18499	3.72543	0.696104
GOTERM_BP_DIRECT	GO:0046777~protein autophosphorylation	23	0.790106	0.0448	AT5G13160, AT3G51550, AT1G08650, AT1G70530, AT5G24430, AT1G01540, AT4G33950, AT4G28490, AT1G09970, AT1G61380, AT2G17520, AT4G32300, AT3G13530, AT4G24740, AT4G26890, AT1G35670, AT3G24550, AT3G17850, AT3G07980, AT4G08500, AT5G54380, AT2G01450, AT4G03260	2069	135	18499	1.52329	0.744887
GOTERM_BP_DIRECT	GO:0090630~activation of GTPase activity	7	0.240467	0.0444814	AT3G59570, AT3G07890, AT4G27100, AT5G52580, AT5G15930, AT5G41940, AT4G29950	2069	24	18499	2.6078	0.749233
GOTERM_BP_DIRECT	GO:0008295~spermidine biosynthetic process	4	0.13741	0.0507444	AT3G25570, AT3G02470, AT2G16500, AT4G34710	2069	8	18499	4.47052	0.775423
GOTERM_BP_DIRECT	GO:0006979~response to oxidative stress	43	1.47716	0.0500235	AT4G12000, AT3G20340, AT5G17820, AT5G05340, AT4G11280, AT2G15560, AT2G16500, AT1G56600, AT1G09970, AT5G56550, AT2G19310, AT5G64120, AT4G26970, AT1G76080, AT2G22420, AT2G04795, AT4G08940, AT1G09940, AT5G44380, AT5G06720, AT4G11830, AT5G47650, AT5G18040, AT2G01140, AT3G28200, AT2G22660, AT1G49540, AT1G73680, AT4G21960, AT5G39580, AT4G34710, AT5G17000, AT5G16970, AT4G23190, AT4G32551, AT1G13440, AT1…	2069	291	18499	1.32118	0.776884
GOTERM_BP_DIRECT	GO:0048510~regulation of timing of transition from vegetative to reproductive phase	9	0.309172	0.055645	AT3G06500, AT5G39860, AT1G10480, AT5G43270, AT1G04080, AT5G62430, AT1G12610, AT4G00650, AT2G34720	2069	38	18499	2.11761	0.800426
GOTERM_BP_DIRECT	GO:0006468~protein phosphorylation	113	3.88183	0.0593159	AT2G23300, AT3G14840, AT1G70530, AT4G19110, AT1G22870, AT3G25560, AT1G52540, AT2G39360, AT3G19100, AT1G72540, AT2G42640, AT1G35670, AT3G57120, AT2G02220, AT3G14350, AT5G44290, AT1G20650, AT5G58520, AT5G60270, AT1G77280, AT1G08650, AT2G28250, AT3G45330, AT5G40540, AT5G01820, AT1G01540, AT1G54510, AT4G11530, AT3G53590, AT4G28490, AT3G23000, AT3G02880, AT5G49780, AT5G24010, AT5G66790, AT5G18610, AT3…	2069	870	18499	1.16131	0.815463
GOTERM_BP_DIRECT	GO:0006857~oligopeptide transport	13	0.446582	0.0662867	AT1G72140, AT1G72130, AT3G17650, AT1G48370, AT3G45650, AT3G45680, AT4G21680, AT1G12110, AT3G47960, AT5G55930, AT4G16370, AT5G62680, AT1G72120	2069	67	18499	1.73483	0.818958
GOTERM_BP_DIRECT	GO:0009909~regulation of flower development	14	0.480934	0.0654469	AT4G31120, AT3G24440, AT2G39940, AT3G21150, AT5G59990, AT2G31650, AT1G52740, AT5G15850, AT4G32551, AT4G15248, AT3G50870, AT5G57660, AT3G18990, AT3G44600	2069	74	18499	1.69155	0.819988
GOTERM_BP_DIRECT	GO:0009934~regulation of meristem structural organization	6	0.206115	0.0645201	AT5G46700, AT1G65470, AT5G19280, AT2G46920, AT2G26170, AT1G04020	2069	20	18499	2.68231	0.820622
GOTERM_BP_DIRECT	GO:0010351~lithium ion transport	3	0.103057	0.064255	AT5G27150, AT1G54370, AT3G51860	2069	4	18499	6.70578	0.82456
GOTERM_BP_DIRECT	GO:0008360~regulation of cell shape	9	0.309172	0.0634343	AT4G03550, AT1G01510, AT5G44610, AT5G57015, AT3G59100, AT1G72710, AT3G07160, AT3G03940, AT2G47410	2069	39	18499	2.06332	0.825811
GOTERM_BP_DIRECT	GO:0035556~intracellular signal transduction	29	0.996221	0.0736404	AT1G30640, AT5G63770, AT5G58440, AT1G06150, AT2G31650, AT2G25350, AT5G59920, AT3G55940, AT1G35670, AT1G48490, AT5G58700, AT3G27580, AT2G26980, AT1G08650, AT5G57565, AT4G26610, AT4G33950, AT3G23000, AT5G40030, AT5G07920, AT3G45530, AT2G21830, AT5G57630, AT2G15900, AT3G17850, AT3G22420, AT3G48260, AT1G15240, AT3G06110	2069	189	18499	1.3719	0.828239
GOTERM_BP_DIRECT	GO:0043622~cortical microtubule organization	7	0.240467	0.0628635	AT5G44610, AT4G20260, AT1G80350, AT5G23720, AT5G65930, AT5G64740, AT3G23090	2069	26	18499	2.4072	0.828348
GOTERM_BP_DIRECT	GO:0010439~regulation of glucosinolate biosynthetic process	4	0.13741	0.0699434	AT2G25450, AT2G14750, AT5G61420, AT5G07690	2069	9	18499	3.97379	0.830967
GOTERM_BP_DIRECT	GO:0031507~heterochromatin assembly	4	0.13741	0.0699434	AT1G65470, AT5G64630, AT4G39100, AT5G11470	2069	9	18499	3.97379	0.830967
GOTERM_BP_DIRECT	GO:0000741~karyogamy	4	0.13741	0.0699434	AT1G76110, AT4G30930, AT1G19520, AT5G23420	2069	9	18499	3.97379	0.830967
GOTERM_BP_DIRECT	GO:0048527~lateral root development	10	0.343525	0.0734337	AT1G13260, AT3G50060, AT1G21210, AT2G46400, AT3G54010, AT2G44900, AT5G47040, AT1G10370, AT3G07360, AT5G42810	2069	47	18499	1.90235	0.831957
GOTERM_BP_DIRECT	GO:0006629~lipid metabolic process	28	0.961869	0.072825	AT4G19860, AT1G11910, AT1G02660, AT2G39420, AT2G17230, AT5G22500, AT3G11170, AT4G26690, AT5G16010, AT5G19660, AT5G18640, AT5G58700, AT5G42930, AT3G44550, AT3G61580, AT3G15820, AT4G38690, AT1G77420, AT3G54320, AT2G42690, AT5G04040, AT2G05260, AT3G62590, AT5G42870, AT1G05800, AT5G41080, AT3G07400, AT1G76680	2069	181	18499	1.38314	0.834007
GOTERM_BP_DIRECT	GO:0010029~regulation of seed germination	9	0.309172	0.0718681	AT1G20450, AT2G45210, AT3G06500, AT1G60190, AT2G20180, AT5G15090, AT5G66730, AT3G47620, AT1G14920	2069	40	18499	2.01173	0.834606
GOTERM_BP_DIRECT	GO:0009086~methionine biosynthetic process	5	0.171762	0.0777873	AT3G63250, AT1G31230, AT3G01120, AT3G22740, AT5G21060	2069	15	18499	2.98034	0.836367
GOTERM_BP_DIRECT	GO:0031627~telomeric loop formation	6	0.206115	0.0772029	AT1G17520, AT3G46590, AT5G59430, AT1G17460, AT1G49950, AT1G72650	2069	21	18499	2.55458	0.838423
GOTERM_BP_DIRECT	GO:0070413~trehalose metabolism in response to stress	6	0.206115	0.0772029	AT4G12430, AT5G51460, AT4G22590, AT1G70290, AT2G22190, AT1G06410	2069	21	18499	2.55458	0.838423
GOTERM_BP_DIRECT	GO:2000377~regulation of reactive oxygen species metabolic process	6	0.206115	0.0772029	AT2G32010, AT5G17490, AT1G66350, AT3G10500, AT4G33950, AT1G14920	2069	21	18499	2.55458	0.838423
GOTERM_BP_DIRECT	GO:0007165~signal transduction	61	2.0955	0.0838925	AT2G26380, AT5G65280, AT1G73200, AT5G58440, AT5G06870, AT3G05370, AT1G18150, AT1G13910, AT4G18700, AT5G45820, AT4G38740, AT5G46260, AT3G20820, AT5G58700, AT2G26980, AT3G59020, AT5G01820, AT3G23000, AT2G34930, AT2G15900, AT3G25670, AT4G19520, AT2G19780, AT5G54710, AT5G66330, AT4G16900, AT2G01450, AT5G01810, AT5G44610, AT5G42140, AT1G48630, AT4G11340, AT1G63740, AT5G46510, AT2G25350, AT4G23440, AT1…	2069	450	18499	1.21201	0.854883
GOTERM_BP_DIRECT	GO:0000271~polysaccharide biosynthetic process	7	0.240467	0.0851007	AT3G03050, AT1G24170, AT3G50760, AT4G24010, AT3G62720, AT4G02130, AT5G16910	2069	28	18499	2.23526	0.85504
GOTERM_BP_DIRECT	GO:0000226~microtubule cytoskeleton organization	7	0.240467	0.0851007	AT1G01510, AT1G20090, AT1G75950, AT1G80350, AT4G26760, AT2G18390, AT1G14690	2069	28	18499	2.23526	0.85504
GOTERM_BP_DIRECT	GO:0007205~protein kinase C-activating G-protein coupled receptor signaling pathway	4	0.13741	0.091871	AT5G63770, AT2G18730, AT4G30340, AT5G07920	2069	10	18499	3.57641	0.872941
GOTERM_BP_DIRECT	GO:0009861~jasmonic acid and ethylene-dependent systemic resistance	4	0.13741	0.091871	AT3G14840, AT2G39940, AT3G01310, AT4G16990	2069	10	18499	3.57641	0.872941
GOTERM_BP_DIRECT	GO:0000038~very long-chain fatty acid metabolic process	5	0.171762	0.0949119	AT2G34770, AT1G19440, AT2G46720, AT2G16280, AT1G01120	2069	16	18499	2.79407	0.878186
GOTERM_BP_DIRECT	GO:0036092~phosphatidylinositol-3-phosphate biosynthetic process	3	0.103057	0.0992783	AT3G14205, AT1G17340, AT1G22620	2069	5	18499	5.36462	0.883247
GOTERM_BP_DIRECT	GO:0034059~response to anoxia	3	0.103057	0.0992783	AT1G72360, AT2G43430, AT4G33070	2069	5	18499	5.36462	0.883247
GOTERM_BP_DIRECT	GO:0018171~peptidyl-cysteine oxidation	3	0.103057	0.0992783	AT3G58670, AT5G15120, AT2G42670	2069	5	18499	5.36462	0.883247
GOTERM_BP_DIRECT	GO:0006065~UDP-glucuronate biosynthetic process	3	0.103057	0.0992783	AT3G29360, AT5G39320, AT1G26570	2069	5	18499	5.36462	0.883247
GOTERM_BP_DIRECT	GO:0042538~hyperosmotic salinity response	11	0.377877	0.0987382	AT5G52310, AT2G37570, AT5G17490, AT1G66350, AT4G23600, AT5G19660, AT4G30996, AT1G19120, AT1G74520, AT1G14920, AT4G33000	2069	57	18499	1.72546	0.885208
GOTERM_MF_DIRECT	GO:0003700~transcription factor activity, sequence-specific DNA binding	276	9.48128	4.57402e-11	AT4G39780, AT3G19860, AT5G06770, AT2G22630, AT5G62430, AT1G06850, AT2G22770, AT2G44745, AT5G28770, AT3G16350, AT5G40220, AT1G69490, AT4G23810, AT1G17520, AT2G45460, AT1G31310, AT1G43160, AT5G60890, AT3G13810, AT4G36730, AT5G58900, AT2G47460, AT1G10170, AT5G07690, AT2G31210, AT2G33310, AT2G18300, AT1G80840, AT5G53290, AT5G51790, AT5G07580, AT1G76900, AT4G23800, AT1G49950, AT1G64380, AT3G23210, AT1…	2022	1711	18171	1.44963	4.13034e-08
GOTERM_MF_DIRECT	GO:0005515~protein binding	277	9.51563	9.10674e-07	AT3G24440, AT1G70530, AT5G62430, AT5G28770, AT4G14110, AT5G25350, AT5G24290, AT1G77390, AT1G63470, AT4G23810, AT1G35670, AT4G36730, AT4G27860, AT2G02220, AT2G18840, AT4G14310, AT2G38310, AT5G06780, AT3G51550, AT1G45688, AT2G18300, AT1G80840, AT5G53290, AT5G01820, AT4G16360, AT5G57900, AT3G18690, AT1G16280, AT3G53260, AT3G50630, AT5G52830, AT4G08500, AT3G02170, AT2G27370, AT3G09770, AT5G03520, AT2…	2022	1901	18171	1.30947	0.000411085
GOTERM_MF_DIRECT	GO:0003714~transcription corepressor activity	12	0.412229	6.87068e-06	AT1G01510, AT3G03570, AT1G72450, AT2G34600, AT1G74950, AT3G17860, AT2G47210, AT5G20510, AT3G22275, AT1G70700, AT3G44530, AT5G13220	2022	22	18171	4.90181	0.00206594
GOTERM_MF_DIRECT	GO:0043565~sequence-specific DNA binding	111	3.81312	2.44327e-05	AT3G60390, AT3G19860, AT1G06850, AT2G46270, AT2G22300, AT2G44745, AT5G28770, AT4G23810, AT1G17520, AT5G49520, AT5G60890, AT4G36730, AT4G05100, AT2G47460, AT5G07690, AT2G44840, AT1G78080, AT1G80840, AT1G49950, AT1G13600, AT1G07530, AT1G06180, AT1G74430, AT3G62420, AT5G41920, AT5G52830, AT4G18170, AT1G14920, AT4G31800, AT2G46400, AT5G59450, AT3G58120, AT1G63910, AT3G10500, AT4G36710, AT3G18990, AT3…	2022	676	18171	1.47562	0.00550056
GOTERM_MF_DIRECT	GO:0016874~ligase activity	52	1.78633	3.7846e-05	AT5G18340, AT5G39550, AT5G16340, AT3G52450, AT2G18600, AT4G28270, AT2G23140, AT2G28840, AT4G19700, AT4G27470, AT2G22010, AT1G20490, AT2G17450, AT5G01830, AT1G23030, AT1G10170, AT3G19910, AT2G35000, AT5G64660, AT1G27910, AT2G39720, AT3G54790, AT1G66660, AT5G64920, AT3G18710, AT5G61560, AT2G14960, AT4G35480, AT5G16370, AT2G40640, AT3G09770, AT1G20780, AT1G05890, AT5G65200, AT1G03365, AT2G23420, AT1…	2022	260	18171	1.79733	0.00681181
GOTERM_MF_DIRECT	GO:0003677~DNA binding	280	9.61869	0.000103154	AT4G39780, AT3G53680, AT3G19860, AT5G06770, AT5G62430, AT1G06850, AT2G22770, AT5G28770, AT3G16350, AT1G69490, AT1G63470, AT4G23810, AT1G17520, AT5G40880, AT1G43160, AT5G60890, AT3G13810, AT4G36730, AT5G58900, AT3G24010, AT3G48940, AT2G47460, AT5G23480, AT5G07690, AT2G31210, AT2G18300, AT5G53290, AT5G51790, AT5G07580, AT4G23800, AT1G49950, AT3G57660, AT1G64380, AT3G23210, AT1G13260, AT4G24200, AT1…	2022	2047	18171	1.22924	0.0154056
GOTERM_MF_DIRECT	GO:0016762~xyloglucan:xyloglucosyl transferase activity	13	0.446582	0.000130719	AT4G37800, AT4G25810, AT2G01850, AT5G57550, AT4G30280, AT1G14720, AT5G57560, AT2G06850, AT3G23730, AT4G03210, AT1G10550, AT4G30270, AT4G30290	2022	33	18171	3.54019	0.0167225
GOTERM_MF_DIRECT	GO:0044212~transcription regulatory region DNA binding	55	1.88939	0.00109317	AT1G01260, AT2G46270, AT2G31650, AT5G60850, AT5G61420, AT3G24050, AT5G67300, AT5G60890, AT4G36730, AT4G05100, AT3G20770, AT1G04240, AT2G47460, AT5G07690, AT2G18300, AT1G80840, AT1G12610, AT1G53320, AT2G44940, AT5G24110, AT5G43270, AT5G02320, AT2G30615, AT1G06180, AT1G74430, AT5G52830, AT3G25730, AT5G40350, AT3G50060, AT4G32800, AT2G26950, AT1G51700, AT1G10480, AT2G46400, AT3G61850, AT1G63910, AT5…	2022	319	18171	1.54942	0.0940461
GOTERM_MF_DIRECT	GO:0004674~protein serine/threonine kinase activity	119	4.08794	0.000926292	AT2G23300, AT5G13160, AT3G14840, AT1G30640, AT1G70530, AT4G19110, AT5G24430, AT3G25560, AT1G72710, AT2G39360, AT3G19100, AT1G72540, AT1G35670, AT2G02220, AT3G14350, AT5G44290, AT1G20650, AT1G33260, AT5G60270, AT3G51550, AT1G08650, AT2G28250, AT3G45330, AT5G01820, AT1G01540, AT1G54510, AT3G03940, AT4G11530, AT4G28490, AT3G53590, AT3G23000, AT3G02880, AT5G49780, AT5G24010, AT5G57015, AT5G66790, AT4…	2022	804	18171	1.33011	0.0993186
GOTERM_MF_DIRECT	GO:0004672~protein kinase activity	77	2.64514	0.00106901	AT2G23300, AT5G13160, AT1G30640, AT3G14840, AT1G70530, AT1G22870, AT5G27620, AT5G49470, AT1G07870, AT5G51350, AT5G61570, AT3G25560, AT1G52540, AT4G24740, AT3G19100, AT1G53430, AT1G53570, AT2G42640, AT1G35670, AT3G57120, AT2G02220, AT3G14350, AT1G20650, AT5G54380, AT3G27580, AT1G49730, AT2G26980, AT3G51550, AT1G77280, AT2G28250, AT5G57565, AT2G36570, AT4G28490, AT3G02880, AT1G61380, AT5G49780, AT5…	2022	482	18171	1.43563	0.101757
GOTERM_MF_DIRECT	GO:0016757~transferase activity, transferring glycosyl groups	78	2.67949	0.00182517	AT1G78280, AT5G15050, AT5G57270, AT4G09500, AT3G22250, AT4G15260, AT3G21750, AT1G74340, AT1G23480, AT5G65470, AT1G05670, AT2G31790, AT1G26810, AT1G28240, AT2G26100, AT3G08550, AT3G03050, AT5G47780, AT3G04240, AT1G74380, AT1G70290, AT3G62720, AT3G05320, AT4G02130, AT2G25260, AT1G68470, AT5G35570, AT1G18690, AT4G27560, AT3G56000, AT1G24170, AT3G56750, AT4G00300, AT3G11420, AT4G31780, AT2G32430, AT5…	2022	499	18171	1.40473	0.139263
GOTERM_MF_DIRECT	GO:0035091~phosphatidylinositol binding	15	0.515287	0.00269876	AT3G22810, AT5G18680, AT3G06380, AT1G73200, AT5G58440, AT2G15900, AT5G42140, AT4G14740, AT1G61690, AT1G20110, AT1G53320, AT1G76900, AT2G25350, AT1G15240, AT1G47270	2022	56	18171	2.40714	0.184013
GOTERM_MF_DIRECT	GO:0016798~hydrolase activity, acting on glycosyl bonds	13	0.446582	0.00364428	AT4G37800, AT4G25810, AT2G01850, AT5G57550, AT4G30280, AT1G14720, AT5G57560, AT2G06850, AT3G23730, AT4G03210, AT1G10550, AT4G30270, AT4G30290	2022	46	18171	2.5397	0.223998
GOTERM_MF_DIRECT	GO:0070696~transmembrane receptor protein serine/threonine kinase binding	5	0.171762	0.00404573	AT3G18710, AT1G20780, AT5G65200, AT1G27910, AT3G07360	2022	7	18171	6.41903	0.230088
GOTERM_MF_DIRECT	GO:0008081~phosphoric diester hydrolase activity	8	0.27482	0.00435509	AT5G18680, AT3G06380, AT4G38690, AT5G41080, AT5G15170, AT1G53320, AT1G76900, AT1G47270	2022	20	18171	3.59466	0.231065
GOTERM_MF_DIRECT	GO:1904264~ubiquitin protein ligase activity involved in ERAD pathway	6	0.206115	0.0101192	AT2G42030, AT1G19310, AT4G34100, AT4G28270, AT1G74990, AT4G27470	2022	13	18171	4.14768	0.43674
GOTERM_MF_DIRECT	GO:0044390~ubiquitin-like protein conjugating enzyme binding	5	0.171762	0.0121263	AT2G42030, AT1G19310, AT4G28270, AT1G74990, AT4G27470	2022	9	18171	4.99258	0.440013
GOTERM_MF_DIRECT	GO:0016301~kinase activity	140	4.80934	0.0109618	AT5G13160, AT2G23300, AT5G49650, AT1G30640, AT3G15220, AT1G70530, AT4G19110, AT3G05370, AT5G24430, AT1G22870, AT1G52540, AT2G14750, AT1G72710, AT2G39360, AT3G19100, AT1G72540, AT5G60890, AT1G35670, AT3G57120, AT5G44290, AT5G58520, AT1G33260, AT5G60270, AT3G51550, AT1G77280, AT1G08650, AT2G28250, AT3G45330, AT5G40540, AT5G01820, AT1G01540, AT1G54510, AT5G23720, AT3G03940, AT4G11530, AT4G28490, AT3…	2022	1039	18171	1.21091	0.443162
GOTERM_MF_DIRECT	GO:0003824~catalytic activity	54	1.85503	0.0117165	AT2G34770, AT5G65280, AT2G38210, AT4G30530, AT3G19710, AT3G49680, AT3G03990, AT3G23820, AT5G65780, AT3G57470, AT4G30440, AT1G14290, AT4G33540, AT5G66420, AT5G56900, AT2G21280, AT3G16260, AT3G60910, AT1G68470, AT1G08200, AT5G51690, AT4G37770, AT4G21320, AT2G33590, AT3G01120, AT1G13700, AT4G32790, AT3G48990, AT5G41120, AT3G20650, AT4G11280, AT4G14440, AT2G39420, AT1G34270, AT2G38230, AT4G30550, AT3…	2022	349	18171	1.39048	0.446363
GOTERM_MF_DIRECT	GO:0004721~phosphoprotein phosphatase activity	14	0.480934	0.0132902	AT5G58160, AT5G36250, AT5G23720, AT4G36350, AT5G16480, AT5G59160, AT2G36540, AT2G42810, AT1G05000, AT3G11410, AT4G26080, AT3G05580, AT5G19280, AT5G43380	2022	60	18171	2.09688	0.453421
GOTERM_MF_DIRECT	GO:0047262~polygalacturonate 4-alpha-galacturonosyltransferase activity	8	0.27482	0.0204179	AT5G47780, AT1G24170, AT3G61130, AT3G01040, AT3G50760, AT4G02130, AT3G25140, AT3G58790	2022	26	18171	2.76512	0.588134
GOTERM_MF_DIRECT	GO:0102338~3-oxo-lignoceronyl-CoA synthase activity	7	0.240467	0.023393	AT1G19440, AT2G46720, AT2G26640, AT1G07720, AT5G43760, AT2G16280, AT1G01120	2022	21	18171	2.99555	0.621517
GOTERM_MF_DIRECT	GO:0102336~3-oxo-arachidoyl-CoA synthase activity	7	0.240467	0.023393	AT1G19440, AT2G46720, AT2G26640, AT1G07720, AT5G43760, AT2G16280, AT1G01120	2022	21	18171	2.99555	0.621517
GOTERM_MF_DIRECT	GO:0102337~3-oxo-cerotoyl-CoA synthase activity	7	0.240467	0.023393	AT1G19440, AT2G46720, AT2G26640, AT1G07720, AT5G43760, AT2G16280, AT1G01120	2022	21	18171	2.99555	0.621517
GOTERM_MF_DIRECT	GO:0004702~receptor signaling protein serine/threonine kinase activity	12	0.412229	0.0257385	AT2G48010, AT5G55090, AT3G15220, AT4G26890, AT1G53570, AT1G53165, AT5G14720, AT3G07980, AT1G18350, AT3G21220, AT3G13530, AT1G69270	2022	52	18171	2.07384	0.625099
GOTERM_MF_DIRECT	GO:0000175~3'-5'-exoribonuclease activity	8	0.27482	0.02499	AT1G61470, AT5G10960, AT1G77680, AT5G14580, AT5G51170, AT1G54440, AT1G80780, AT2G47220	2022	27	18171	2.66271	0.629757
GOTERM_MF_DIRECT	GO:0005524~ATP binding	293	10.0653	0.028964	AT1G60890, AT1G30640, AT1G70530, AT5G24430, AT1G22870, AT5G57710, AT1G01220, AT3G01610, AT1G73110, AT1G52540, AT3G25560, AT1G72540, AT3G10420, AT2G42640, AT1G35670, AT2G02220, AT1G20650, AT1G33260, AT3G51550, AT1G77280, AT3G45330, AT2G28250, AT1G02520, AT5G01820, AT3G03940, AT1G54510, AT4G28490, AT4G16360, AT3G02880, AT5G49780, AT3G49160, AT5G55090, AT5G57015, AT1G68460, AT1G16280, AT5G49840, AT1…	2022	2372	18171	1.11007	0.654108
GOTERM_MF_DIRECT	GO:0016629~12-oxophytodienoate reductase activity	3	0.103057	0.0343461	AT1G76690, AT2G06050, AT1G76680	2022	3	18171	8.98665	0.702944
GOTERM_MF_DIRECT	GO:0017137~Rab GTPase binding	8	0.27482	0.0361286	AT3G59570, AT3G07890, AT4G27100, AT5G43900, AT5G52580, AT5G15930, AT5G41940, AT4G29950	2022	29	18171	2.47908	0.707903
GOTERM_MF_DIRECT	GO:0003727~single-stranded RNA binding	12	0.412229	0.0375404	AT3G46950, AT4G02020, AT5G55580, AT1G78930, AT4G38160, AT5G54180, AT3G17040, AT1G54440, AT3G05780, AT2G03050, AT1G61980, AT5G04430	2022	55	18171	1.96072	0.708871
GOTERM_MF_DIRECT	GO:0008168~methyltransferase activity	26	0.893164	0.0413632	AT1G27930, AT5G04370, AT5G42760, AT4G24805, AT1G78240, AT3G63250, AT4G35987, AT1G04430, AT5G63100, AT4G25730, AT4G28830, AT3G17310, AT1G20330, AT5G47680, AT3G60910, AT1G76090, AT4G18030, AT2G34300, AT2G27590, AT1G77660, AT2G43200, AT2G22740, AT1G26850, AT1G13790, AT4G13330, AT3G22740	2022	157	18171	1.48823	0.731622
GOTERM_MF_DIRECT	GO:0004722~protein serine/threonine phosphatase activity	25	0.858811	0.0428246	AT1G67820, AT5G27930, AT1G09160, AT3G12620, AT2G46920, AT4G36350, AT1G68410, AT2G28890, AT2G33700, AT3G11410, AT4G26080, AT4G31770, AT5G43380, AT5G02400, AT2G01880, AT5G36250, AT1G47380, AT5G59160, AT1G43900, AT2G42810, AT2G30020, AT3G62260, AT1G07630, AT3G05580, AT5G19280	2022	150	18171	1.49777	0.732179
GOTERM_MF_DIRECT	GO:0005516~calmodulin binding	42	1.4428	0.0487775	AT5G44610, AT3G21070, AT2G17480, AT4G02600, AT1G70530, AT5G43900, AT5G15410, AT5G54590, AT1G18150, AT2G22300, AT3G52290, AT1G27460, AT4G32300, AT4G29900, AT5G63160, AT1G09100, AT3G56690, AT5G07240, AT5G62390, AT4G23060, AT1G27770, AT4G28600, AT1G35670, AT5G67480, AT5G07820, AT4G34750, AT1G08650, AT5G62070, AT5G65930, AT4G13100, AT5G04020, AT1G61380, AT1G67310, AT1G61460, AT3G28140, AT5G27150, AT4…	2022	284	18171	1.32901	0.745482
GOTERM_MF_DIRECT	GO:0000989~transcription factor activity, transcription factor binding	5	0.171762	0.0479466	AT5G17490, AT1G66350, AT2G21320, AT1G14920, AT4G38960	2022	13	18171	3.4564	0.750052
GOTERM_MF_DIRECT	GO:0003682~chromatin binding	23	0.790106	0.0524967	AT5G47140, AT1G05910, AT3G53830, AT1G19000, AT5G56840, AT5G42140, AT1G43700, AT1G68580, AT5G56860, AT5G11470, AT2G46020, AT3G50870, AT3G24050, AT3G48060, AT5G16040, AT2G20950, AT2G20960, AT4G26150, AT2G16900, AT5G63550, AT2G27350, AT4G39100, AT3G44600	2022	138	18171	1.49777	0.751239
GOTERM_MF_DIRECT	GO:0005096~GTPase activator activity	15	0.515287	0.0475481	AT3G59570, AT3G07890, AT5G58510, AT2G37550, AT5G52580, AT1G48590, AT4G29950, AT4G27100, AT4G13350, AT1G70790, AT3G15730, AT3G17660, AT5G15930, AT3G63130, AT5G41940	2022	78	18171	1.7282	0.758054
GOTERM_MF_DIRECT	GO:0004439~phosphatidylinositol-4,5-bisphosphate 5-phosphatase activity	6	0.206115	0.0521212	AT3G14205, AT2G32010, AT1G17340, AT2G35680, AT4G18010, AT1G22620	2022	19	18171	2.83789	0.758686
GOTERM_MF_DIRECT	GO:0016758~transferase activity, transferring hexosyl groups	26	0.893164	0.0637677	AT5G65550, AT1G11730, AT5G37950, AT3G50760, AT4G09500, AT2G18570, AT1G56600, AT2G29730, AT3G22250, AT3G21750, AT2G31790, AT1G22360, AT1G26810, AT2G26100, AT3G46700, AT3G29630, AT1G74380, AT3G62720, AT4G02130, AT1G18690, AT4G27560, AT3G01040, AT1G24170, AT2G32430, AT3G25140, AT3G58790	2022	164	18171	1.42471	0.799735
GOTERM_MF_DIRECT	GO:0042803~protein homodimerization activity	28	0.961869	0.0621169	AT1G01510, AT1G17455, AT3G07780, AT4G00570, AT2G39180, AT5G48160, AT5G13220, AT4G24660, AT3G28180, AT4G26750, AT1G79750, AT1G55250, AT2G38310, AT5G12440, AT2G40330, AT1G74660, AT5G65930, AT2G21280, AT5G02200, AT1G49950, AT5G51070, AT5G03150, AT1G13600, AT4G17870, AT4G00650, AT5G50960, AT4G18880, AT2G27370	2022	179	18171	1.40573	0.799831
GOTERM_MF_DIRECT	GO:0051753~mannan synthase activity	4	0.13741	0.0690661	AT3G03050, AT2G35650, AT5G22740, AT5G16910	2022	9	18171	3.99407	0.817437
GOTERM_MF_DIRECT	GO:0042578~phosphoric ester hydrolase activity	4	0.13741	0.0690661	AT3G14205, AT1G17340, AT3G58490, AT1G22620	2022	9	18171	3.99407	0.817437
GOTERM_MF_DIRECT	GO:0005262~calcium channel activity	8	0.27482	0.0767728	AT2G32400, AT1G09575, AT5G15410, AT5G66650, AT1G27770, AT4G35290, AT5G06660, AT5G57940	2022	34	18171	2.11451	0.835244
GOTERM_MF_DIRECT	GO:0004805~trehalose-phosphatase activity	6	0.206115	0.0758522	AT4G12430, AT5G51460, AT4G22590, AT1G70290, AT2G22190, AT1G06410	2022	21	18171	2.56761	0.839016
GOTERM_MF_DIRECT	GO:0004143~diacylglycerol kinase activity	4	0.13741	0.0907575	AT5G63770, AT2G18730, AT4G30340, AT5G07920	2022	10	18171	3.59466	0.870695
GOTERM_MF_DIRECT	GO:0004084~branched-chain-amino-acid transaminase activity	4	0.13741	0.0907575	AT5G65780, AT3G05190, AT3G19710, AT3G49680	2022	10	18171	3.59466	0.870695
GOTERM_MF_DIRECT	GO:0004864~protein phosphatase inhibitor activity	5	0.171762	0.0935214	AT4G17870, AT5G05440, AT5G52200, AT2G38310, AT2G40330	2022	16	18171	2.80833	0.872794
GOTERM_MF_DIRECT	GO:0003691~double-stranded telomeric DNA binding	6	0.206115	0.0895676	AT1G17520, AT3G46590, AT5G59430, AT1G17460, AT1G49950, AT1G72650	2022	22	18171	2.4509	0.873394
GOTERM_MF_DIRECT	GO:0004806~triglyceride lipase activity	9	0.309172	0.0987922	AT5G42930, AT2G42690, AT1G02660, AT5G04040, AT2G05260, AT3G62590, AT1G05800, AT3G07400, AT5G18640	2022	43	18171	1.88093	0.875981
GOTERM_MF_DIRECT	GO:0003999~adenine phosphoribosyltransferase activity	3	0.103057	0.0983884	AT1G80050, AT4G22570, AT5G11160	2022	5	18171	5.39199	0.880635
GOTERM_MF_DIRECT	GO:0003979~UDP-glucose 6-dehydrogenase activity	3	0.103057	0.0983884	AT3G29360, AT5G39320, AT1G26570	2022	5	18171	5.39199	0.880635
GOTERM_MF_DIRECT	GO:0033843~xyloglucan 6-xylosyltransferase activity	3	0.103057	0.0983884	AT1G18690, AT1G74380, AT3G62720	2022	5	18171	5.39199	0.880635
GOTERM_MF_DIRECT	GO:0017172~cysteine dioxygenase activity	3	0.103057	0.0983884	AT3G58670, AT5G15120, AT2G42670	2022	5	18171	5.39199	0.880635
GOTERM_CC_DIRECT	GO:0005886~plasma membrane	538	18.4816	1.70315e-14	AT1G60890, AT1G23730, AT3G05370, AT1G05340, AT4G34640, AT1G48590, AT2G27080, AT3G01610, AT1G75220, AT1G52540, AT3G25560, AT4G38740, AT1G35670, AT2G17760, AT2G02220, AT4G27720, AT1G20650, AT3G22740, AT2G38310, AT5G58700, AT3G51550, AT2G28250, AT1G02520, AT2G21500, AT1G45688, AT5G15970, AT1G54510, AT3G43720, AT1G14040, AT4G32600, AT3G11420, AT2G20840, AT4G08500, AT2G27370, AT4G03550, AT1G72130, AT5…	2715	3702	25147	1.34605	5.31675e-12
GOTERM_CC_DIRECT	GO:0005634~nucleus	1201	41.2573	1.7851e-09	AT1G05340, AT1G22730, AT3G16350, AT4G14110, AT5G25350, AT4G26600, AT1G48590, AT2G40110, AT3G01610, AT5G56140, AT5G60890, AT2G36026, AT5G58900, AT3G24010, AT2G18840, AT3G58240, AT4G14310, AT2G38310, AT1G33260, AT2G18630, AT2G31210, AT1G13670, AT2G21500, AT1G70290, AT1G26570, AT4G09510, AT5G03270, AT1G35260, AT3G63210, AT3G16170, AT3G54130, AT3G45530, AT1G13260, AT3G21215, AT4G21320, AT1G06180, AT4…	2715	9796	25147	1.13556	2.79368e-07
GOTERM_CC_DIRECT	GO:0005802~trans-Golgi network	56	1.92374	8.10127e-06	AT1G01510, AT1G27300, AT5G03700, AT2G34300, AT5G40830, AT3G23820, AT2G43200, AT4G30440, AT4G27720, AT2G18840, AT5G06700, AT5G13710, AT3G03050, AT3G08550, AT1G04430, AT1G45688, AT2G38530, AT1G74380, AT4G30260, AT3G62720, AT1G14040, AT1G30450, AT4G18030, AT1G18690, AT3G56750, AT4G15610, AT4G30996, AT5G16910, AT3G25140, AT1G35350, AT1G08030, AT5G13500, AT4G36890, AT2G26890, AT4G17430, AT5G04480, AT1…	2715	280	25147	1.85245	0.000844878
GOTERM_CC_DIRECT	GO:0005622~intracellular	103	3.5383	2.55504e-05	AT1G30640, AT5G63770, AT1G06400, AT3G21150, AT4G35870, AT3G59900, AT2G18390, AT5G01330, AT3G51770, AT4G17170, AT5G58700, AT2G44840, AT2G32400, AT3G59570, AT3G07890, AT5G62920, AT3G51550, AT5G57180, AT2G43610, AT1G56310, AT4G35290, AT2G33500, AT5G24340, AT5G07580, AT1G04020, AT3G45530, AT2G43580, AT1G54440, AT2G01450, AT5G03520, AT4G29080, AT5G01760, AT3G45280, AT3G07560, AT2G21880, AT2G32415, AT1…	2715	634	25147	1.50475	0.00199735
GOTERM_CC_DIRECT	GO:0005768~endosome	54	1.85503	5.56873e-05	AT1G54370, AT1G27300, AT5G47960, AT5G03700, AT2G34300, AT5G40830, AT3G23820, AT2G43200, AT4G30440, AT4G27720, AT5G06700, AT5G13710, AT3G03050, AT3G08550, AT2G28250, AT1G04430, AT2G38530, AT1G74380, AT4G30260, AT3G62720, AT1G30450, AT4G18030, AT1G18690, AT3G56750, AT4G30996, AT4G15610, AT4G08500, AT5G16910, AT3G25140, AT1G08030, AT5G13500, AT4G36890, AT4G17430, AT2G25350, AT5G04480, AT1G59820, AT4…	2715	285	25147	1.75495	0.00348005
GOTERM_CC_DIRECT	GO:0005794~Golgi apparatus	173	5.94297	0.000182055	AT2G15730, AT3G11030, AT5G15050, AT5G58440, AT1G52280, AT3G11130, AT5G03700, AT2G18390, AT1G22530, AT1G75220, AT4G39220, AT1G23480, AT5G65470, AT1G05670, AT1G04200, AT3G06550, AT1G79590, AT5G19660, AT4G27720, AT4G17170, AT2G21580, AT2G18840, AT1G26810, AT5G06700, AT3G59570, AT3G08550, AT3G03050, AT5G47780, AT2G38530, AT5G39580, AT1G11890, AT4G02130, AT5G60670, AT1G14040, AT1G30450, AT5G35570, AT3…	2715	1226	25147	1.30699	0.00945309
GOTERM_CC_DIRECT	GO:0016021~integral component of membrane	659	22.6383	0.00028658	AT2G15730, AT5G09711, AT5G15050, AT3G05370, AT3G10560, AT4G35870, AT1G62880, AT4G34640, AT2G27080, AT2G28840, AT4G27470, AT4G35080, AT3G25560, AT4G39220, AT5G49990, AT2G43200, AT3G06550, AT4G27860, AT2G02220, AT4G27720, AT2G18840, AT4G14310, AT1G28200, AT1G78260, AT2G18630, AT3G51550, AT2G28250, AT1G02520, AT2G46720, AT1G45688, AT1G34640, AT1G22882, AT1G14040, AT5G49780, AT3G52260, AT4G03460, AT3…	2715	5439	25147	1.12223	0.0111514
GOTERM_CC_DIRECT	GO:0031225~anchored component of membrane	46	1.58021	0.000285099	AT5G10080, AT5G44130, AT3G58100, AT4G22640, AT5G15350, AT4G12730, AT1G27950, AT4G12420, AT5G41280, AT4G31840, AT1G74790, AT5G19230, AT1G03870, AT4G26690, AT3G04010, AT3G61980, AT3G06750, AT2G17760, AT3G44100, AT4G37450, AT4G28100, AT2G25060, AT1G02405, AT1G55330, AT5G60920, AT4G27520, AT5G65390, AT4G28085, AT2G22470, AT3G43720, AT2G23130, AT5G63500, AT4G36010, AT4G28280, AT5G49280, AT5G11740, AT5…	2715	246	25147	1.73196	0.0126689
GOTERM_CC_DIRECT	GO:0009506~plasmodesma	143	4.9124	0.000535125	AT1G20450, AT3G14840, AT1G76160, AT5G45280, AT5G17820, AT5G24430, AT2G27080, AT3G11130, AT4G29900, AT5G66920, AT1G52540, AT3G15730, AT1G30740, AT5G49990, AT2G21580, AT1G14830, AT1G17620, AT2G46520, AT5G13710, AT2G32400, AT3G51550, AT2G37180, AT1G02520, AT3G15480, AT5G48450, AT5G01820, AT4G11530, AT3G02880, AT3G57660, AT5G24010, AT3G18710, AT1G22600, AT5G19770, AT5G44020, AT3G07320, AT1G53210, AT4…	2715	1008	25147	1.31399	0.0184432
GOTERM_CC_DIRECT	GO:0046658~anchored component of plasma membrane	33	1.13363	0.00182903	AT5G44610, AT1G13830, AT5G10080, AT5G20890, AT5G44130, AT3G11660, AT3G58100, AT5G15350, AT4G12730, AT1G27950, AT4G12420, AT3G55430, AT5G41280, AT5G55180, AT4G31840, AT1G03870, AT5G19230, AT1G74790, AT4G26690, AT3G04010, AT2G25060, AT4G28100, AT5G60920, AT4G27520, AT3G23770, AT5G48450, AT3G43720, AT3G02880, AT3G11650, AT2G26600, AT5G53730, AT4G20260, AT3G07320	2715	174	25147	1.75663	0.0556903
GOTERM_CC_DIRECT	GO:0005929~cilium	6	0.206115	0.00601857	AT5G18680, AT3G06380, AT3G19990, AT1G53320, AT1G76900, AT1G47270	2715	12	25147	4.63112	0.15783
GOTERM_CC_DIRECT	GO:0005856~cytoskeleton	15	0.515287	0.00742398	AT5G01730, AT3G53750, AT5G41790, AT5G04990, AT5G65930, AT5G03540, AT2G37620, AT3G18780, AT5G03340, AT3G01610, AT3G55770, AT3G56480, AT5G01840, AT3G02170, AT4G02350	2715	64	25147	2.17084	0.176642
GOTERM_CC_DIRECT	GO:0005774~vacuolar membrane	77	2.64514	0.00813538	AT3G28960, AT1G52280, AT1G30360, AT2G38210, AT3G57020, AT3G11130, AT4G12420, AT2G34300, AT1G75220, AT5G40830, AT3G50830, AT1G17340, AT1G64200, AT2G43200, AT1G54270, AT2G21410, AT3G62150, AT5G67480, AT2G21580, AT5G13710, AT1G04430, AT3G44330, AT3G52640, AT4G17340, AT2G01690, AT1G11580, AT4G18030, AT1G35620, AT4G36195, AT5G27150, AT5G15090, AT3G47520, AT3G51860, AT1G53210, AT3G14205, AT3G58730, AT2…	2715	536	25147	1.33058	0.178543
GOTERM_CC_DIRECT	GO:0005737~cytoplasm	518	17.7946	0.0151552	AT1G20450, AT5G07080, AT5G06770, AT3G01750, AT1G05340, AT1G22870, AT2G32150, AT1G01220, AT2G38210, AT4G30530, AT4G14110, AT2G28840, AT5G37750, AT2G45460, AT4G38740, AT4G36730, AT3G22740, AT2G38310, AT4G31120, AT5G53290, AT5G15970, AT1G70290, AT4G16360, AT1G26570, AT3G55770, AT1G21080, AT5G02680, AT5G44610, AT3G09770, AT2G32030, AT3G06330, AT2G35680, AT5G40590, AT1G03365, AT1G09260, AT2G38230, AT2…	2715	4407	25147	1.08869	0.289241
GOTERM_CC_DIRECT	GO:0005618~cell wall	80	2.7482	0.0241427	AT2G01850, AT3G17390, AT1G76160, AT5G45280, AT5G06870, AT5G17820, AT5G05340, AT5G20890, AT3G52500, AT5G03540, AT2G37620, AT1G10550, AT2G47550, AT4G12420, AT3G55430, AT5G66920, AT1G32970, AT5G45650, AT3G20820, AT3G44100, AT5G19660, AT4G14310, AT4G30290, AT5G38940, AT3G53750, AT3G54400, AT5G57560, AT1G29670, AT1G41830, AT3G23730, AT4G03210, AT4G21326, AT3G02880, AT2G34930, AT1G11580, AT4G34670, AT5…	2715	588	25147	1.26017	0.331419
GOTERM_CC_DIRECT	GO:0005773~vacuole	85	2.91996	0.023398	AT2G47710, AT1G11910, AT1G73200, AT1G52280, AT1G30360, AT3G11700, AT5G15350, AT1G32400, AT3G57020, AT3G11130, AT4G30920, AT1G59610, AT3G15730, AT3G62110, AT3G62550, AT1G30740, AT1G64200, AT1G79590, AT3G44100, AT2G21410, AT4G17170, AT1G11840, AT5G13710, AT1G12240, AT2G37180, AT4G27520, AT5G01820, AT3G44330, AT3G07460, AT3G52640, AT4G17340, AT4G36195, AT5G27150, AT5G15090, AT3G07470, AT2G38760, AT5…	2715	629	25147	1.25165	0.337477
GOTERM_CC_DIRECT	GO:0009505~plant-type cell wall	50	1.71762	0.0231854	AT1G76160, AT5G45280, AT5G06870, AT5G17820, AT1G53830, AT4G38400, AT3G52500, AT4G12420, AT2G47550, AT5G66920, AT4G32460, AT1G12240, AT5G60920, AT3G08550, AT3G54400, AT5G48450, AT4G15800, AT1G41830, AT5G39580, AT3G09410, AT3G02880, AT1G11580, AT4G18030, AT1G80170, AT4G36195, AT1G35620, AT3G62060, AT1G62440, AT4G16563, AT3G07320, AT2G06850, AT5G44130, AT3G45970, AT4G38420, AT1G27950, AT4G30270, AT5…	2715	341	25147	1.3581	0.350732
GOTERM_CC_DIRECT	GO:0000139~Golgi membrane	52	1.78633	0.0209852	AT5G15050, AT5G47510, AT2G34300, AT1G71980, AT1G23480, AT3G06550, AT5G19660, AT1G26810, AT2G26100, AT3G03050, AT1G04430, AT5G47780, AT1G74380, AT1G11890, AT3G62720, AT4G02130, AT4G18030, AT1G68470, AT1G18690, AT5G27150, AT3G56000, AT1G24170, AT2G32430, AT3G25140, AT3G58790, AT1G08030, AT4G36890, AT5G03520, AT1G11730, AT1G10290, AT3G50760, AT1G59820, AT5G56160, AT3G61130, AT3G28180, AT1G26850, AT5…	2715	355	25147	1.35672	0.357605
GOTERM_CC_DIRECT	GO:0005829~cytosol	280	9.61869	0.0224508	AT1G20450, AT5G49650, AT1G23730, AT3G18485, AT5G45280, AT1G06850, AT1G22870, AT3G52500, AT4G30530, AT3G11130, AT3G49680, AT3G21750, AT3G48720, AT3G19400, AT4G38740, AT3G17210, AT1G35670, AT5G42880, AT3G50970, AT5G58700, AT5G53620, AT4G31120, AT4G25210, AT1G59700, AT1G26570, AT4G09510, AT3G02880, AT5G03270, AT3G57660, AT3G16170, AT3G25570, AT5G42870, AT3G53260, AT4G39130, AT3G48260, AT1G75330, AT4…	2715	2309	25147	1.12318	0.358663
GOTERM_CC_DIRECT	GO:0036513~Derlin-1 retrotranslocation complex	5	0.171762	0.0329306	AT2G42030, AT1G19310, AT4G28270, AT1G74990, AT4G27470	2715	12	25147	3.85927	0.392915
GOTERM_CC_DIRECT	GO:0070449~elongin complex	4	0.13741	0.031469	AT5G05140, AT3G48060, AT4G24200, AT3G10820	2715	7	25147	5.29271	0.393715
GOTERM_CC_DIRECT	GO:0000932~cytoplasmic mRNA processing body	10	0.343525	0.0935446	AT3G20800, AT1G03330, AT2G32550, AT5G44260, AT1G77680, AT5G61780, AT1G19120, AT5G12980, AT2G45810, AT3G63210	2715	51	25147	1.81613	0.737251
GOTERM_CC_DIRECT	GO:0005623~cell	28	0.961869	0.0919654	AT4G35870, AT5G58530, AT1G76080, AT3G07560, AT5G21990, AT3G17880, AT3G58620, AT4G17170, AT5G24030, AT1G13730, AT2G41330, AT4G00250, AT3G57070, AT2G45140, AT4G15660, AT3G16690, AT5G57180, AT4G27970, AT3G24170, AT2G42580, AT3G56090, AT5G55190, AT3G02040, AT1G50950, AT5G41080, AT2G47450, AT1G07960, AT3G21460	2715	192	25147	1.35074	0.746539
KEGG_PATHWAY	ath04075:Plant hormone signal transduction	49	1.68327	1.83326e-05	AT3G04730, AT5G25350, AT5G13220, AT3G23240, AT1G79130, AT5G05440, AT3G20770, AT1G04240, AT3G56380, AT2G38310, AT4G36110, AT5G62920, AT2G33310, AT5G57560, AT4G12410, AT1G56150, AT2G14960, AT1G74950, AT4G16110, AT5G67260, AT1G14920, AT4G29080, AT4G32280, AT2G45210, AT2G25490, AT4G28640, AT3G17860, AT3G11410, AT1G63500, AT4G26080, AT3G23030, AT1G52830, AT1G51950, AT2G40330, AT5G18020, AT2G01760, AT4…	470	265	4727	1.85968	0.00206946
KEGG_PATHWAY	ath00620:Pyruvate metabolism	16	0.549639	0.0168218	AT1G18500, AT5G65690, AT4G00570, AT2G34590, AT3G49160, AT4G17260, AT4G34240, AT3G47520, AT1G23800, AT1G79750, AT3G13930, AT2G38040, AT1G11840, AT2G43430, AT5G08570, AT5G16390	470	84	4727	1.9157	0.380757
KEGG_PATHWAY	ath00010:Glycolysis / Gluconeogenesis	19	0.652697	0.0282242	AT2G01140, AT1G50460, AT3G55440, AT5G65690, AT5G47810, AT2G36460, AT2G34590, AT3G49160, AT4G17260, AT5G01330, AT1G13440, AT4G23730, AT1G78050, AT4G34240, AT1G23800, AT3G17940, AT3G13930, AT4G33070, AT5G08570	470	113	4727	1.69108	0.416787
KEGG_PATHWAY	ath00520:Amino sugar and nucleotide sugar metabolism	22	0.755754	0.0239094	AT1G50460, AT5G47780, AT3G02570, AT2G43610, AT1G01220, AT1G26570, AT3G02230, AT1G08200, AT3G23820, AT3G61130, AT3G01040, AT5G15650, AT2G43580, AT3G01640, AT4G30440, AT4G39210, AT5G39320, AT3G29360, AT2G34850, AT3G25140, AT5G52560, AT3G58790	470	135	4727	1.63899	0.421268
KEGG_PATHWAY	ath00100:Steroid biosynthesis	8	0.27482	0.0458326	AT3G52940, AT5G04040, AT1G58440, AT1G20330, AT4G12110, AT4G34640, AT1G76090, AT5G13710	470	34	4727	2.36646	0.44515
KEGG_PATHWAY	ath00062:Fatty acid elongation	9	0.309172	0.0157818	AT4G17470, AT1G19440, AT2G46720, AT2G26640, AT1G07720, AT5G43760, AT5G47330, AT2G16280, AT1G01120	470	34	4727	2.66227	0.450742
KEGG_PATHWAY	ath00330:Arginine and proline metabolism	10	0.343525	0.0743241	AT3G25570, AT3G59050, AT4G34240, AT3G30775, AT1G23800, AT3G02470, AT2G16500, AT4G34710, AT5G38710, AT1G65840	470	53	4727	1.89763	0.463863
KEGG_PATHWAY	ath03018:RNA degradation	17	0.583992	0.0797135	AT4G34110, AT5G10960, AT5G14580, AT5G47810, AT5G12980, AT5G35430, AT5G35910, AT3G20800, AT1G03905, AT1G61470, AT2G32550, AT1G03330, AT1G19120, AT5G60170, AT1G54440, AT2G45810, AT1G80780	470	111	4727	1.54033	0.465164
KEGG_PATHWAY	ath00592:alpha-Linolenic acid metabolism	8	0.27482	0.0599753	AT1G76690, AT1G17420, AT5G04040, AT1G67560, AT3G25770, AT2G06050, AT3G25760, AT1G76680	470	36	4727	2.23499	0.470255
KEGG_PATHWAY	ath00290:Valine, leucine and isoleucine biosynthesis	6	0.206115	0.0706729	AT1G18500, AT5G14200, AT5G65780, AT4G13430, AT3G19710, AT3G49680	470	23	4727	2.62368	0.471176
KEGG_PATHWAY	ath04144:Endocytosis	22	0.755754	0.0392225	AT1G60890, AT2G43160, AT5G03520, AT2G37550, AT1G52280, AT1G10290, AT3G11130, AT2G17840, AT5G47960, AT1G60430, AT1G59610, AT2G42010, AT3G15730, AT5G09260, AT3G17660, AT1G17730, AT4G26750, AT4G16144, AT2G19710, AT4G11830, AT3G12400, AT5G02500	470	142	4727	1.5582	0.475817
KEGG_PATHWAY	ath00561:Glycerolipid metabolism	12	0.412229	0.0114552	AT5G63770, AT5G04040, AT4G34240, AT1G80380, AT1G23800, AT5G42870, AT4G31780, AT1G32200, AT3G51520, AT2G18730, AT4G30340, AT5G07920	470	52	4727	2.32095	0.478454
KEGG_PATHWAY	ath00053:Ascorbate and aldarate metabolism	9	0.309172	0.0450992	AT1G07890, AT2G19800, AT4G34240, AT3G01640, AT1G23800, AT3G29360, AT5G39320, AT1G26570, AT5G52560	470	41	4727	2.20773	0.478913
KEGG_PATHWAY	ath04931:Insulin resistance	8	0.27482	0.0679478	AT4G08960, AT3G04240, AT4G26080, AT3G11410, AT3G05580, AT4G16360, AT5G59160, AT5G43380	470	37	4727	2.17458	0.4845
KEGG_PATHWAY	ath01110:Biosynthesis of secondary metabolites	116	3.98488	0.0574589	AT1G18500, AT5G63770, AT1G19440, AT5G17820, AT1G31710, AT5G57190, AT3G19710, AT4G34640, AT3G49680, AT4G39980, AT4G17260, AT5G01330, AT3G15730, AT3G25760, AT3G22740, AT5G13710, AT2G01140, AT2G46720, AT5G39580, AT1G07720, AT5G38710, AT3G49160, AT1G12550, AT1G68460, AT5G05590, AT3G30775, AT3G47520, AT3G25770, AT1G13700, AT5G42870, AT3G53260, AT1G75330, AT1G52340, AT1G50460, AT1G61680, AT4G23600, AT1…	470	1019	4727	1.14491	0.487619

## Sheet: darkorange2
Supplementary Data S6. Functional annotation of the co-expression module “darkorange2” derived from WGCNA (GO terms and KEGG pathways using DAVID)
Category	Term	Count	%	PValue	Genes	List Total	Pop Hits	Pop Total	Fold Enrichment	Benjamini
GOTERM_BP_DIRECT	GO:0009611~response to wounding	43	1.49357	2.58171e-05	AT3G25250, AT5G59820, AT5G47240, AT1G51400, AT2G28900, AT1G32920, AT1G20510, AT1G19660, AT3G61190, AT4G02260, AT1G61120, AT4G08170, AT5G54640, AT1G27730, AT3G51420, AT1G51760, AT1G72520, AT4G32940, AT4G16740, AT1G32640, AT2G39260, AT1G05200, AT2G26690, AT3G44260, AT1G71697, AT5G20230, AT1G26630, AT3G54420, AT3G15356, AT3G46860, AT5G53890, AT2G47800, AT5G08790, AT4G21670, AT4G24350, AT2G32700, AT5…	2043	199	18499	1.95657	0.0143029
GOTERM_BP_DIRECT	GO:0006468~protein phosphorylation	138	4.79333	9.21671e-06	AT1G60800, AT5G01020, AT2G23770, AT5G43020, AT2G26330, AT3G44200, AT5G07180, AT4G24480, AT1G34110, AT1G50240, AT2G26730, AT2G45910, AT3G57530, AT1G73660, AT2G17700, AT2G20050, AT2G20635, AT5G56790, AT5G41730, AT4G21940, AT2G24230, AT5G63370, AT1G71410, AT2G31280, AT5G56890, AT4G34220, AT3G01490, AT5G38240, AT3G04810, AT2G01830, AT1G73690, AT1G50700, AT1G67510, AT1G29750, AT1G18670, AT1G69220, AT4…	2043	870	18499	1.43628	0.0153104
GOTERM_BP_DIRECT	GO:0007169~transmembrane receptor protein tyrosine kinase signaling pathway	32	1.1115	2.50232e-05	AT1G10850, AT5G01950, AT1G67510, AT5G56040, AT1G29750, AT5G43020, AT5G58300, AT5G67200, AT3G17840, AT1G27190, AT3G28040, AT4G36180, AT5G51560, AT3G03770, AT1G34110, AT2G01950, AT5G10020, AT2G26730, AT3G51740, AT5G14210, AT2G42290, AT3G13065, AT5G53890, AT1G75820, AT4G23740, AT2G24230, AT5G01890, AT4G34220, AT2G01210, AT3G56370, AT1G07650, AT1G63430	2043	130	18499	2.22888	0.0207269
GOTERM_BP_DIRECT	GO:0009826~unidimensional cell growth	26	0.903091	0.000576843	AT2G19760, AT1G68530, AT3G51160, AT2G37640, AT5G26240, AT2G35350, AT5G54510, AT4G25420, AT5G64340, AT1G30570, AT3G49120, AT4G16780, AT4G22970, AT1G75500, AT5G19530, AT1G26770, AT2G39700, AT4G02980, AT1G75750, AT2G03090, AT3G18000, AT1G13980, AT2G40610, AT3G55500, AT1G09330, AT4G01630	2043	114	18499	2.06513	0.214534
GOTERM_BP_DIRECT	GO:0010311~lateral root formation	13	0.451546	0.00280804	AT2G38120, AT3G05090, AT2G23430, AT4G37060, AT1G13980, AT3G59420, AT5G20730, AT4G37070, AT5G05730, AT1G21410, AT1G15570, AT4G01630, AT1G77740	2043	45	18499	2.61584	0.44479
GOTERM_BP_DIRECT	GO:0009738~abscisic acid-activated signaling pathway	36	1.25043	0.00256142	AT1G70810, AT3G10660, AT1G50700, AT1G52570, AT2G01540, AT1G05470, AT5G63980, AT5G13610, AT2G40180, AT1G42550, AT3G46620, AT5G46790, AT3G59220, AT1G64060, AT3G01090, AT1G32640, AT5G58670, AT5G13530, AT2G17820, AT3G57530, AT4G35310, AT1G53300, AT5G13680, AT4G21670, AT1G28490, AT4G17615, AT5G51990, AT5G37740, AT2G46680, AT5G04870, AT4G21940, AT4G23650, AT3G19290, AT3G56850, AT5G63470, AT1G73000	2043	195	18499	1.67166	0.458456
GOTERM_BP_DIRECT	GO:0010223~secondary shoot formation	8	0.277874	0.00208865	AT5G61480, AT3G14067, AT4G32810, AT3G18550, AT5G02030, AT1G77300, AT1G55580, AT1G73870	2043	18	18499	4.02437	0.50342
GOTERM_BP_DIRECT	GO:0009408~response to heat	31	1.07676	0.00255383	AT5G22060, AT5G59820, AT3G24500, AT4G26850, AT3G28030, AT1G06460, AT4G36990, AT5G03280, AT5G49910, AT3G61190, AT1G59860, AT2G46240, AT3G08970, AT5G53000, AT5G58140, AT1G05850, AT5G53170, AT1G16540, AT5G02490, AT4G37910, AT3G06010, AT5G56030, AT3G63350, AT5G48030, AT4G26780, AT1G79440, AT1G32330, AT2G27140, AT5G14800, AT1G08550, AT5G05410	2043	160	18499	1.75437	0.510039
GOTERM_BP_DIRECT	GO:0009926~auxin polar transport	14	0.48628	0.00693803	AT2G38120, AT5G19530, AT4G32810, AT1G76520, AT2G34650, AT5G03280, AT5G23080, AT1G77110, AT5G01990, AT2G36910, AT1G15690, AT3G28860, AT1G23080, AT1G73590	2043	56	18499	2.26371	0.540209
GOTERM_BP_DIRECT	GO:0040008~regulation of growth	21	0.72942	0.00669029	AT4G00450, AT1G65380, AT1G26945, AT5G67500, AT2G42870, AT3G04740, AT3G23380, AT3G06010, AT2G47230, AT5G23080, AT2G46690, AT5G16490, AT5G60410, AT3G61880, AT3G54950, AT4G31500, AT5G20730, AT1G16510, AT2G26710, AT3G62300, AT4G39730	2043	101	18499	1.88269	0.551862
GOTERM_BP_DIRECT	GO:0009958~positive gravitropism	10	0.347343	0.00785844	AT2G36910, AT5G47990, AT2G38120, AT2G34650, AT1G16510, AT3G28860, AT2G36810, AT4G37590, AT1G68370, AT1G77740	2043	33	18499	2.74389	0.561957
GOTERM_BP_DIRECT	GO:0016192~vesicle-mediated transport	32	1.1115	0.00446086	AT1G51740, AT1G01960, AT4G23460, AT4G32150, AT1G21900, AT5G07120, AT5G08080, AT3G55480, AT3G22845, AT1G23900, AT1G29330, AT4G29160, AT4G22970, AT3G43300, AT2G33120, AT1G13980, AT4G19003, AT1G48760, AT1G03380, AT5G46860, AT2G27600, AT1G52360, AT1G16240, AT1G23490, AT3G01340, AT1G05360, AT1G09330, AT5G54730, AT5G64990, AT4G38200, AT3G08530, AT1G16020	2043	173	18499	1.67488	0.564638
GOTERM_BP_DIRECT	GO:0046777~protein autophosphorylation	26	0.903091	0.00653214	AT1G67840, AT3G10660, AT1G50700, AT1G71830, AT3G13690, AT3G45780, AT5G58140, AT1G04400, AT3G57530, AT1G70520, AT4G35310, AT4G32660, AT5G03730, AT1G10470, AT2G31800, AT4G21940, AT3G05840, AT1G08680, AT5G04870, AT4G23650, AT2G43850, AT2G20300, AT1G16670, AT2G41140, AT2G01210, AT1G09020	2043	135	18499	1.74389	0.569969
GOTERM_BP_DIRECT	GO:0009624~response to nematode	17	0.590483	0.0061154	AT2G38120, AT4G39030, AT1G69850, AT2G47800, AT4G21480, AT2G22840, AT2G38290, AT1G64780, AT2G36910, AT3G60160, AT2G30080, AT2G32700, AT5G13740, AT1G73260, AT5G06680, AT1G61800, AT2G21050	2043	74	18499	2.08016	0.575022
GOTERM_BP_DIRECT	GO:0032259~methylation	36	1.25043	0.00984175	AT5G51130, AT4G02405, AT2G43910, AT5G49810, AT2G32170, AT1G77530, AT1G73320, AT1G43245, AT3G44860, AT1G21120, AT2G43320, AT5G44170, AT3G28460, AT5G64030, AT2G21070, AT3G25900, AT3G23300, AT3G05100, AT1G23360, AT1G31600, AT5G10605, AT1G80860, AT3G03780, AT3G61210, AT4G00750, AT3G18000, AT5G37170, AT1G08060, AT1G21110, AT2G40280, AT3G44870, AT5G14430, AT4G17080, AT1G02100, AT3G61740, AT1G29790	2043	212	18499	1.53761	0.581637
GOTERM_BP_DIRECT	GO:0009965~leaf morphogenesis	14	0.48628	0.00941182	AT4G32810, AT2G37630, AT2G23760, AT2G48120, AT2G44950, AT5G67100, AT5G13300, AT5G13680, AT4G36380, AT1G52150, AT4G36870, AT2G26330, AT1G68130, AT1G69780	2043	58	18499	2.18565	0.584987
GOTERM_BP_DIRECT	GO:0015031~protein transport	53	1.84092	0.00894566	AT2G28900, AT5G47200, AT4G32150, AT1G61250, AT2G34940, AT4G24840, AT3G22845, AT4G19490, AT3G18820, AT2G02040, AT3G18160, AT5G45130, AT3G21865, AT4G29160, AT3G53230, AT2G36680, AT1G30630, AT1G43890, AT1G22740, AT4G09720, AT1G13980, AT2G16640, AT4G39990, AT2G27600, AT1G23490, AT1G33410, AT5G64990, AT4G38200, AT5G59150, AT1G51740, AT1G01960, AT1G21900, AT4G12120, AT5G07120, AT1G33040, AT4G39180, AT1…	2043	339	18499	1.41565	0.587223
GOTERM_BP_DIRECT	GO:0009414~response to water deprivation	46	1.59778	0.00590284	AT3G24500, AT2G01830, AT4G34890, AT1G27320, AT3G22380, AT2G40880, AT5G63980, AT5G13750, AT1G02730, AT5G45340, AT3G46620, AT1G27730, AT3G18490, AT5G58140, AT1G05850, AT4G24960, AT5G58670, AT1G04400, AT3G09940, AT2G18960, AT2G17820, AT2G18050, AT3G11020, AT2G39800, AT1G30270, AT2G39550, AT4G38410, AT3G06010, AT1G02205, AT2G47800, AT5G56030, AT4G17615, AT1G47128, AT5G40390, AT2G46680, AT2G32700, AT5…	2043	279	18499	1.49291	0.593823
GOTERM_BP_DIRECT	GO:0009942~longitudinal axis specification	5	0.173671	0.0118081	AT1G19850, AT5G56270, AT5G59340, AT1G13980, AT1G23080	2043	9	18499	5.03046	0.594986
GOTERM_BP_DIRECT	GO:0010050~vegetative phase change	5	0.173671	0.0118081	AT2G15790, AT5G23570, AT3G01090, AT1G69440, AT5G60450	2043	9	18499	5.03046	0.594986
GOTERM_BP_DIRECT	GO:0006438~valyl-tRNA aminoacylation	4	0.138937	0.0113091	AT1G27160, AT1G14610, AT5G16715, AT1G28350	2043	5	18499	7.24386	0.59612
GOTERM_BP_DIRECT	GO:0019222~regulation of metabolic process	4	0.138937	0.0113091	AT4G09000, AT4G24150, AT5G38480, AT5G65430	2043	5	18499	7.24386	0.59612
GOTERM_BP_DIRECT	GO:0010118~stomatal movement	9	0.312609	0.0111354	AT1G16540, AT5G46860, AT1G30270, AT1G09780, AT4G32150, AT2G47800, AT5G58140, AT4G17615, AT1G04400	2043	29	18499	2.81012	0.6083
GOTERM_BP_DIRECT	GO:0009734~auxin-activated signaling pathway	34	1.18097	0.00561113	AT3G26810, AT1G19850, AT1G76520, AT2G34650, AT5G03280, AT5G23080, AT2G36910, AT2G46690, AT5G54510, AT1G16510, AT1G21410, AT1G23080, AT2G01950, AT2G21050, AT1G75500, AT2G38120, AT1G14000, AT1G16540, AT4G24390, AT4G23980, AT4G02980, AT3G16500, AT1G31880, AT5G13680, AT5G45550, AT5G01240, AT5G01990, AT1G77110, AT3G62100, AT5G20730, AT5G49980, AT3G28860, AT1G73590, AT5G60450	2043	190	18499	1.62034	0.610132
GOTERM_BP_DIRECT	GO:0010286~heat acclimation	10	0.347343	0.020103	AT5G21160, AT4G26780, AT3G11020, AT5G60410, AT3G47220, AT5G56030, AT5G58140, AT4G38580, AT2G41140, AT5G05410	2043	38	18499	2.38285	0.716087
GOTERM_BP_DIRECT	GO:0042128~nitrate assimilation	11	0.382077	0.0194677	AT1G08090, AT2G26690, AT5G21170, AT3G45720, AT3G45060, AT1G69850, AT4G24730, AT3G01090, AT1G77760, AT1G68570, AT3G45700	2043	44	18499	2.26371	0.717981
GOTERM_BP_DIRECT	GO:0009658~chloroplast organization	23	0.798889	0.0181316	AT5G35220, AT2G41660, AT2G48120, AT3G08010, AT2G17700, AT5G24660, AT1G63680, AT1G49510, AT4G25910, AT2G34620, AT5G02250, AT3G47390, AT5G22640, AT4G16390, AT2G43090, AT5G13770, AT4G22260, AT1G63900, AT4G14605, AT1G12410, AT2G36000, AT3G56940, AT4G28740	2043	125	18499	1.66609	0.720928
GOTERM_BP_DIRECT	GO:0009793~embryo development ending in seed dormancy	66	2.29246	0.0211452	AT4G00020, AT3G18110, AT3G20630, AT3G27670, AT1G10270, AT2G26830, AT4G10760, AT4G00060, AT3G18390, AT3G54720, AT4G13230, AT2G45270, AT1G71830, AT3G59420, AT4G26300, AT2G46140, AT2G34830, AT5G61760, AT5G16715, AT5G48230, AT1G13980, AT3G63080, AT4G14590, AT2G35340, AT5G02250, AT4G37300, AT2G32700, AT5G39680, AT4G31160, AT2G46310, AT4G36800, AT1G80410, AT4G37140, AT3G20070, AT1G73590, AT1G19850, AT5…	2043	459	18499	1.302	0.721332
GOTERM_BP_DIRECT	GO:0006949~syncytium formation	6	0.208406	0.0189669	AT2G39700, AT1G26770, AT2G40610, AT2G03090, AT2G37640, AT3G55500	2043	15	18499	3.62193	0.72258
GOTERM_BP_DIRECT	GO:0035196~production of miRNAs involved in gene silencing by miRNA	6	0.208406	0.0189669	AT2G21150, AT2G28380, AT3G20550, AT1G69440, AT1G24706, AT5G23080	2043	15	18499	3.62193	0.72258
GOTERM_BP_DIRECT	GO:0008361~regulation of cell size	6	0.208406	0.0189669	AT2G36910, AT5G42350, AT4G11920, AT5G08790, AT3G28860, AT1G66740	2043	15	18499	3.62193	0.72258
GOTERM_BP_DIRECT	GO:0016310~phosphorylation	33	1.14623	0.0175466	AT2G26830, AT3G45040, AT4G39940, AT2G21940, AT5G14060, AT2G41880, AT1G80460, AT2G01460, AT3G03900, AT4G02260, AT4G08170, AT3G46280, AT5G58730, AT1G61640, AT5G67080, AT1G71697, AT2G35390, AT5G61760, AT3G10030, AT2G39800, AT2G20900, AT2G17265, AT1G73980, AT4G11845, AT3G17470, AT3G60250, AT1G21640, AT5G21170, AT3G05840, AT4G36280, AT1G72040, AT3G56370, AT1G07650	2043	198	18499	1.50914	0.724295
GOTERM_BP_DIRECT	GO:0009846~pollen germination	13	0.451546	0.022775	AT3G55200, AT3G10380, AT1G71820, AT2G41110, AT2G43900, AT2G13680, AT3G55220, AT4G29380, AT5G48230, AT3G04080, AT5G18280, AT1G02410, AT1G76850	2043	58	18499	2.02953	0.735489
GOTERM_BP_DIRECT	GO:0019760~glucosinolate metabolic process	10	0.347343	0.0236498	AT4G37750, AT5G44210, AT1G61730, AT2G44730, AT3G19290, AT1G76880, AT1G04880, AT2G30590, AT5G51990, AT2G22840	2043	39	18499	2.32175	0.736977
GOTERM_BP_DIRECT	GO:0009744~response to sucrose	12	0.416811	0.024489	AT1G72320, AT5G47010, AT4G34160, AT5G21170, AT2G28900, AT1G69780, AT4G01900, AT5G03730, AT5G08790, AT1G74670, AT1G61800, AT1G20950	2043	52	18499	2.08957	0.737858
GOTERM_BP_DIRECT	GO:0009910~negative regulation of flower development	11	0.382077	0.0261433	AT3G12810, AT5G16260, AT5G60410, AT5G65070, AT1G30970, AT1G77300, AT3G54720, AT1G79280, AT5G67100, AT3G19980, AT4G20400	2043	46	18499	2.16528	0.749881
GOTERM_BP_DIRECT	GO:0006897~endocytosis	14	0.48628	0.0298967	AT5G54280, AT5G44100, AT1G13980, AT5G13300, AT5G07120, AT5G18190, AT4G19640, AT2G01600, AT3G13670, AT3G19960, AT5G22770, AT3G43300, AT3G08530, AT5G22780	2043	67	18499	1.89205	0.765834
GOTERM_BP_DIRECT	GO:0050790~regulation of catalytic activity	7	0.24314	0.028267	AT1G02300, AT2G44070, AT1G01960, AT1G13980, AT5G27970, AT4G38200, AT3G43300	2043	22	18499	2.88108	0.766498
GOTERM_BP_DIRECT	GO:0009651~response to salt stress	68	2.36193	0.0293203	AT1G61210, AT1G66280, AT4G32150, AT5G63980, AT3G02360, AT1G27730, AT4G22330, AT2G16720, AT1G48000, AT3G09940, AT5G62690, AT1G16540, AT3G57530, AT5G08590, AT1G73660, AT3G03780, AT2G38170, AT2G37630, AT1G06040, AT5G58003, AT5G07440, AT5G56030, AT4G37530, AT2G46280, AT4G21670, AT4G17615, AT5G41580, AT3G50940, AT1G31180, AT3G51960, AT5G14800, AT5G20010, AT3G19290, AT3G07370, AT4G19810, AT3G03640, AT4…	2043	484	18499	1.27216	0.768963
GOTERM_BP_DIRECT	GO:0001736~establishment of planar polarity	3	0.104203	0.0338517	AT2G38120, AT5G03280, AT1G13980	2043	3	18499	9.05482	0.780649
GOTERM_BP_DIRECT	GO:0006656~phosphatidylcholine biosynthetic process	4	0.138937	0.0333983	AT1G80860, AT4G39180, AT3G18000, AT2G32260	2043	7	18499	5.17418	0.784944
GOTERM_BP_DIRECT	GO:0006121~mitochondrial electron transport, succinate to ubiquinone	4	0.138937	0.0333983	AT5G66760, AT5G09600, AT4G32210, AT5G40650	2043	7	18499	5.17418	0.784944
GOTERM_BP_DIRECT	GO:0001558~regulation of cell growth	5	0.173671	0.0354279	AT2G26330, AT5G42350, AT1G55350, AT1G69220, AT3G12280	2043	12	18499	3.77284	0.787383
GOTERM_BP_DIRECT	GO:0048366~leaf development	22	0.764154	0.0328427	AT1G13870, AT3G13730, AT2G06200, AT4G24150, AT2G19760, AT2G23430, AT5G56030, AT4G36380, AT2G22840, AT3G12280, AT3G54220, AT2G42600, AT4G25420, AT1G15690, AT4G31160, AT5G28640, AT4G19600, AT1G65650, AT5G20730, AT4G00850, AT2G46310, AT1G56180	2043	125	18499	1.59365	0.788351
GOTERM_BP_DIRECT	GO:0007264~small GTPase mediated signal transduction	20	0.694686	0.0374709	AT1G43890, AT5G59150, AT5G47200, AT3G21700, AT1G22740, AT4G09720, AT3G46060, AT5G59840, AT4G39990, AT5G65270, AT1G75840, AT4G19640, AT5G67560, AT5G20010, AT3G18820, AT1G23490, AT5G45130, AT5G52210, AT3G03120, AT5G64990	2043	112	18499	1.61693	0.789719
GOTERM_BP_DIRECT	GO:0048367~shoot system development	14	0.48628	0.0371035	AT2G39705, AT5G02030, AT5G59510, AT2G23430, AT5G24630, AT5G10250, AT1G02730, AT3G10870, AT4G31160, AT1G65650, AT2G20300, AT4G13395, AT5G55730, AT1G73590	2043	69	18499	1.83721	0.794502
GOTERM_BP_DIRECT	GO:0008652~cellular amino acid biosynthetic process	14	0.48628	0.0371035	AT3G10030, AT4G39940, AT2G41220, AT4G14880, AT5G66120, AT2G21940, AT5G14060, AT1G29410, AT2G45300, AT3G03900, AT1G22410, AT1G48850, AT5G05730, AT1G75500	2043	69	18499	1.83721	0.794502
GOTERM_BP_DIRECT	GO:0055085~transmembrane transport	33	1.14623	0.0414944	AT5G48970, AT4G35300, AT3G45060, AT1G76520, AT1G72820, AT4G24120, AT3G27020, AT2G36910, AT5G13750, AT4G18050, AT2G46320, AT5G56450, AT1G23080, AT5G10190, AT5G67500, AT3G01280, AT5G09470, AT3G28345, AT5G03555, AT5G24380, AT1G08090, AT5G01240, AT5G01500, AT5G01990, AT1G77110, AT5G15640, AT5G65687, AT4G25450, AT3G28860, AT1G74780, AT5G26200, AT2G34190, AT1G73590	2043	212	18499	1.40948	0.815322
GOTERM_BP_DIRECT	GO:0006970~response to osmotic stress	21	0.72942	0.0457666	AT1G16540, AT2G17820, AT5G08590, AT2G30250, AT1G53300, AT1G27320, AT5G03280, AT4G17615, AT3G59770, AT5G41580, AT5G19000, AT1G02730, AT2G43850, AT1G59860, AT3G51960, AT1G42550, AT3G14440, AT4G14605, AT4G04920, AT3G17510, AT2G35510	2043	122	18499	1.55862	0.831752
GOTERM_BP_DIRECT	GO:0009630~gravitropism	9	0.312609	0.0455172	AT5G35220, AT3G62100, AT5G13750, AT1G68130, AT5G20730, AT5G39510, AT2G36810, AT3G54220, AT1G73590	2043	37	18499	2.20252	0.836933
GOTERM_BP_DIRECT	GO:0009959~negative gravitropism	4	0.138937	0.0491276	AT5G35220, AT5G46860, AT5G58960, AT2G36810	2043	8	18499	4.52741	0.840103
GOTERM_BP_DIRECT	GO:0006183~GTP biosynthetic process	4	0.138937	0.0491276	AT1G79470, AT4G23900, AT1G17410, AT1G16350	2043	8	18499	4.52741	0.840103
GOTERM_BP_DIRECT	GO:0032012~regulation of ARF protein signal transduction	4	0.138937	0.0491276	AT1G01960, AT1G13980, AT4G38200, AT3G43300	2043	8	18499	4.52741	0.840103
GOTERM_BP_DIRECT	GO:0070417~cellular response to cold	8	0.277874	0.048424	AT5G20230, AT1G66280, AT1G20823, AT1G27320, AT5G12140, AT1G10930, AT1G29390, AT1G05200	2043	31	18499	2.33673	0.842203
GOTERM_BP_DIRECT	GO:0008152~metabolic process	44	1.52831	0.0507926	AT5G17050, AT1G04710, AT5G05860, AT5G16940, AT1G22400, AT5G13690, AT2G43820, AT5G59480, AT3G46690, AT1G20510, AT3G59420, AT2G03550, AT2G43090, AT1G30600, AT5G27320, AT2G05920, AT5G44730, AT1G51760, AT5G12890, AT4G16740, AT1G47480, AT1G12420, AT2G29900, AT3G46680, AT3G16520, AT1G67830, AT4G21650, AT5G48230, AT1G08940, AT1G69040, AT1G30530, AT1G79460, AT1G05560, AT3G56040, AT3G54970, AT3G14067, AT3…	2043	303	18499	1.31489	0.843804
GOTERM_BP_DIRECT	GO:0048510~regulation of timing of transition from vegetative to reproductive phase	9	0.312609	0.0522944	AT1G28420, AT1G02740, AT5G50080, AT4G29720, AT3G24870, AT1G27360, AT5G03730, AT5G39660, AT1G27370	2043	38	18499	2.14456	0.846366
GOTERM_BP_DIRECT	GO:0048829~root cap development	5	0.173671	0.0599899	AT5G01240, AT3G59420, AT2G38120, AT2G20000, AT2G21050	2043	14	18499	3.23386	0.853071
GOTERM_BP_DIRECT	GO:0032502~developmental process	13	0.451546	0.0557143	AT2G06200, AT2G42870, AT1G21150, AT3G22380, AT5G07120, AT2G34620, AT5G06810, AT2G30490, AT4G14605, AT3G28720, AT2G36000, AT1G51690, AT1G74120	2043	66	18499	1.78353	0.853289
GOTERM_BP_DIRECT	GO:0051301~cell division	33	1.14623	0.0571661	AT1G10270, AT3G57060, AT5G48600, AT1G63680, AT2G44950, AT3G54670, AT5G03280, AT5G40740, AT4G34160, AT2G20000, AT4G21270, AT5G61600, AT1G34460, AT4G37630, AT4G11920, AT3G53230, AT2G39090, AT5G61480, AT1G17580, AT2G20190, AT3G21870, AT2G27170, AT2G20635, AT1G44110, AT3G47690, AT1G66740, AT1G12360, AT5G45550, AT1G70210, AT5G60410, AT4G19600, AT1G15570, AT5G06150	2043	218	18499	1.37068	0.855165
GOTERM_BP_DIRECT	GO:0009740~gibberellic acid mediated signaling pathway	14	0.48628	0.0550563	AT5G15230, AT1G22690, AT5G61850, AT5G13910, AT1G75750, AT1G09530, AT1G74670, AT4G24210, AT4G02780, AT1G79460, AT4G25420, AT3G10185, AT5G27320, AT5G63470	2043	73	18499	1.73654	0.855527
GOTERM_BP_DIRECT	GO:0051298~centrosome duplication	3	0.104203	0.0627747	AT2G35630, AT5G06680, AT1G80260	2043	4	18499	6.79112	0.856008
GOTERM_BP_DIRECT	GO:1901672~positive regulation of systemic acquired resistance	3	0.104203	0.0627747	AT4G36280, AT4G04920, AT4G36290	2043	4	18499	6.79112	0.856008
GOTERM_BP_DIRECT	GO:0016197~endosomal transport	3	0.104203	0.0627747	AT3G19870, AT5G13530, AT2G38020	2043	4	18499	6.79112	0.856008
GOTERM_BP_DIRECT	GO:0009831~plant-type cell wall modification involved in multidimensional cell growth	7	0.24314	0.0597493	AT2G39700, AT1G26770, AT2G40610, AT2G03090, AT2G37640, AT3G55500, AT4G01630	2043	26	18499	2.43784	0.857142
GOTERM_BP_DIRECT	GO:0009860~pollen tube growth	20	0.694686	0.0588134	AT2G36880, AT5G04950, AT3G10380, AT5G47200, AT2G13680, AT3G23380, AT3G27960, AT3G18000, AT5G48230, AT4G14880, AT4G17615, AT4G38430, AT3G57670, AT5G15470, AT1G71820, AT5G16490, AT3G08970, AT1G04950, AT1G76850, AT5G49680	2043	118	18499	1.53472	0.857911
GOTERM_BP_DIRECT	GO:0006099~tricarboxylic acid cycle	11	0.382077	0.0620989	AT2G42600, AT5G66760, AT5G09600, AT2G22780, AT1G47420, AT2G44350, AT5G03290, AT5G55070, AT3G55410, AT4G32210, AT5G40650	2043	53	18499	1.8793	0.857911
GOTERM_BP_DIRECT	GO:0048364~root development	25	0.868357	0.0658205	AT5G47990, AT1G19850, AT2G39800, AT3G54720, AT1G31880, AT5G24630, AT4G00730, AT2G22840, AT3G54220, AT5G45550, AT5G24310, AT3G62100, AT3G59420, AT5G13750, AT2G20000, AT2G27230, AT4G16780, AT1G62830, AT2G31280, AT3G28860, AT1G23080, AT4G04920, AT1G64625, AT5G55730, AT1G73590	2043	158	18499	1.43272	0.86461
GOTERM_BP_DIRECT	GO:0010256~endomembrane system organization	4	0.138937	0.0677874	AT4G28485, AT1G05360, AT5G39650, AT3G21550	2043	9	18499	4.02437	0.868132
GOTERM_BP_DIRECT	GO:0009423~chorismate biosynthetic process	4	0.138937	0.0677874	AT1G48850, AT2G21940, AT5G66120, AT2G45300	2043	9	18499	4.02437	0.868132
GOTERM_BP_DIRECT	GO:0080167~response to karrikin	21	0.72942	0.0692029	AT5G19520, AT1G71100, AT5G17050, AT2G46170, AT3G45060, AT1G06040, AT2G34650, AT4G27280, AT1G74670, AT5G59340, AT1G30530, AT1G80460, AT5G25460, AT1G10960, AT5G13750, AT1G07440, AT2G47930, AT2G30490, AT4G02940, AT4G37470, AT1G61800	2043	128	18499	1.48556	0.869284
GOTERM_BP_DIRECT	GO:0008202~steroid metabolic process	5	0.173671	0.0749074	AT4G22540, AT5G59420, AT3G09300, AT4G12460, AT4G25850	2043	15	18499	3.01827	0.886089
GOTERM_BP_DIRECT	GO:0010087~phloem or xylem histogenesis	7	0.24314	0.0810728	AT5G19530, AT1G27320, AT5G13300, AT1G13980, AT5G10250, AT1G52150, AT5G23080	2043	28	18499	2.26371	0.898002
GOTERM_BP_DIRECT	GO:0008284~positive regulation of cell proliferation	7	0.24314	0.0810728	AT1G65660, AT3G04740, AT5G14960, AT5G59340, AT5G13680, AT5G08320, AT4G10090	2043	28	18499	2.26371	0.898002
GOTERM_BP_DIRECT	GO:0006886~intracellular protein transport	29	1.00729	0.080014	AT5G42570, AT2G38020, AT4G23460, AT1G21900, AT5G08080, AT5G53570, AT3G55480, AT4G28550, AT4G16143, AT1G48440, AT1G23900, AT2G20760, AT5G22780, AT3G02460, AT1G54030, AT5G63640, AT1G28490, AT1G48760, AT5G46860, AT1G52360, AT3G56190, AT5G20010, AT1G16240, AT3G01340, AT2G45070, AT3G03160, AT5G22770, AT3G08530, AT3G09740	2043	193	18499	1.36057	0.898595
GOTERM_BP_DIRECT	GO:0007030~Golgi organization	6	0.208406	0.0873145	AT1G71830, AT4G24840, AT1G05360, AT2G46180, AT1G09330, AT2G19950	2043	22	18499	2.4695	0.904914
GOTERM_BP_DIRECT	GO:0006261~DNA-dependent DNA replication	6	0.208406	0.0873145	AT5G04130, AT1G77470, AT4G18820, AT3G20540, AT2G02480, AT1G14460	2043	22	18499	2.4695	0.904914
GOTERM_BP_DIRECT	GO:0051276~chromosome organization	4	0.138937	0.0891328	AT5G48600, AT3G54670, AT5G24630, AT1G10930	2043	10	18499	3.62193	0.906323
GOTERM_BP_DIRECT	GO:0045493~xylan catabolic process	4	0.138937	0.0891328	AT1G78060, AT3G10740, AT1G68560, AT5G49360	2043	10	18499	3.62193	0.906323
GOTERM_BP_DIRECT	GO:0035556~intracellular signal transduction	28	0.97256	0.0972396	AT3G25250, AT3G10660, AT1G50700, AT5G09890, AT2G34650, AT5G07120, AT2G21840, AT3G45780, AT2G27230, AT3G01090, AT2G20470, AT5G58140, AT5G58690, AT3G17510, AT5G58670, AT2G29900, AT3G57530, AT5G08590, AT1G30270, AT3G10550, AT4G35310, AT1G60060, AT5G04870, AT4G21940, AT4G23650, AT3G47220, AT2G42060, AT2G31280	2043	189	18499	1.34146	0.907304
GOTERM_BP_DIRECT	GO:0006606~protein import into nucleus	9	0.312609	0.0856267	AT1G12930, AT4G11790, AT2G31660, AT5G20010, AT1G14850, AT4G16143, AT1G79280, AT4G32910, AT4G38760	2043	42	18499	1.94032	0.907318
GOTERM_BP_DIRECT	GO:0016042~lipid catabolic process	25	0.868357	0.0871181	AT5G42170, AT3G14225, AT1G53990, AT3G57140, AT2G39220, AT4G37060, AT5G45920, AT1G52570, AT1G53920, AT2G30550, AT5G15720, AT5G45910, AT3G05180, AT1G28660, AT3G54950, AT3G47220, AT4G37070, AT1G28570, AT1G58520, AT5G58690, AT4G16070, AT5G58670, AT4G10955, AT1G06800, AT5G40990	2043	163	18499	1.38878	0.907829
GOTERM_BP_DIRECT	GO:0048765~root hair cell differentiation	5	0.173671	0.0914983	AT2G38120, AT2G22475, AT5G03280, AT1G13980, AT4G00730	2043	16	18499	2.82963	0.909058
GOTERM_BP_DIRECT	GO:0009061~anaerobic respiration	5	0.173671	0.0914983	AT5G66760, AT1G33055, AT3G27220, AT5G10040, AT1G19530	2043	16	18499	2.82963	0.909058
GOTERM_BP_DIRECT	GO:0006839~mitochondrial transport	9	0.312609	0.0955327	AT5G48970, AT1G14560, AT5G15640, AT5G27520, AT2G46320, AT5G56450, AT5G09470, AT1G72820, AT5G26200	2043	43	18499	1.8952	0.909392
GOTERM_BP_DIRECT	GO:0010051~xylem and phloem pattern formation	7	0.24314	0.0931295	AT1G05470, AT4G08150, AT1G19850, AT5G02030, AT5G13300, AT2G01950, AT1G73590	2043	29	18499	2.18565	0.909871
GOTERM_BP_DIRECT	GO:0008283~cell proliferation	10	0.347343	0.0944398	AT1G22840, AT3G20060, AT5G28640, AT3G20550, AT4G00850, AT4G16780, AT5G13680, AT1G15570, AT1G69690, AT5G45550	2043	50	18499	1.81096	0.909889
GOTERM_BP_DIRECT	GO:0032877~positive regulation of DNA endoreduplication	3	0.104203	0.097085	AT4G02980, AT1G55350, AT4G11920	2043	5	18499	5.43289	0.909995
GOTERM_BP_DIRECT	GO:0043481~anthocyanin accumulation in tissues in response to UV light	3	0.104203	0.097085	AT2G36910, AT3G28860, AT4G00730	2043	5	18499	5.43289	0.909995
GOTERM_BP_DIRECT	GO:0007229~integrin-mediated signaling pathway	3	0.104203	0.097085	AT2G31800, AT2G43850, AT3G58760	2043	5	18499	5.43289	0.909995
GOTERM_MF_DIRECT	GO:0005524~ATP binding	348	12.0875	6.49028e-08	AT1G73670, AT5G22060, AT2G06200, AT4G09140, AT5G27380, AT5G01020, AT2G23770, AT3G50000, AT5G43020, AT1G28350, AT1G10930, AT5G14060, AT1G07200, AT1G80460, AT1G20510, AT3G55010, AT2G36910, AT3G13690, AT1G74230, AT4G08170, AT5G07180, AT1G71010, AT5G66310, AT1G34110, AT2G26730, AT1G71697, AT1G73660, AT2G27170, AT1G68710, AT1G05350, AT4G02480, AT5G51280, AT5G16715, AT2G20635, AT5G35360, AT3G22330, AT5…	2054	2372	18171	1.29791	6.71721e-05
GOTERM_MF_DIRECT	GO:0004672~protein kinase activity	90	3.12609	1.81474e-06	AT1G10850, AT3G25250, AT3G06640, AT3G10660, AT3G53030, AT2G23770, AT5G37790, AT5G43020, AT1G51620, AT4G13020, AT5G15730, AT3G44200, AT4G31170, AT5G46570, AT5G58300, AT4G24480, AT5G67200, AT1G11050, AT3G01090, AT3G17840, AT1G27190, AT4G35500, AT2G26730, AT2G39110, AT1G14000, AT5G13530, AT3G50530, AT5G08590, AT3G57530, AT2G42290, AT1G15530, AT5G06740, AT4G35310, AT2G17700, AT2G20050, AT5G06940, AT1…	2054	482	18171	1.65186	0.000938691
GOTERM_MF_DIRECT	GO:0005515~protein binding	268	9.30879	6.15122e-05	AT4G00020, AT3G13360, AT3G13222, AT2G18060, AT5G33280, AT3G50000, AT5G40740, AT5G23080, AT5G22350, AT4G19490, AT1G74230, AT2G15530, AT3G62300, AT3G21865, AT4G34210, AT1G73660, AT1G11400, AT1G09530, AT4G38430, AT5G37740, AT1G64860, AT5G47010, AT4G02070, AT2G45980, AT1G09470, AT2G46310, AT3G19290, AT1G23490, AT4G23570, AT1G33410, AT1G73000, AT1G47580, AT1G28420, AT5G61850, AT2G39810, AT1G73690, AT5…	2054	1901	18171	1.24719	0.0209987
GOTERM_MF_DIRECT	GO:0004674~protein serine/threonine kinase activity	120	4.16811	0.00114792	AT1G60800, AT5G01020, AT3G50000, AT5G43020, AT3G13690, AT2G26330, AT3G44200, AT5G07180, AT5G58140, AT1G34110, AT1G50240, AT2G26730, AT2G45910, AT2G17700, AT2G20050, AT2G20635, AT2G31800, AT2G24230, AT2G31280, AT4G34220, AT1G16670, AT5G38240, AT3G04810, AT5G59650, AT1G73690, AT1G67510, AT1G29750, AT4G14580, AT1G80640, AT3G51990, AT3G17410, AT2G42960, AT3G13670, AT4G36180, AT3G03770, AT5G51560, AT1…	2054	804	18171	1.32039	0.257101
GOTERM_MF_DIRECT	GO:0005086~ARF guanyl-nucleotide exchange factor activity	6	0.208406	0.00282929	AT1G01960, AT2G45070, AT1G13980, AT5G27970, AT4G38200, AT3G43300	2054	10	18171	5.30798	0.443726
GOTERM_MF_DIRECT	GO:0004712~protein serine/threonine/tyrosine kinase activity	13	0.451546	0.00995958	AT1G14000, AT1G73660, AT3G06640, AT4G32660, AT5G03730, AT2G17700, AT5G41730, AT2G31800, AT2G43850, AT4G31170, AT4G24480, AT3G58760, AT3G01490	2054	51	18171	2.25503	0.683709
GOTERM_MF_DIRECT	GO:0010011~auxin binding	5	0.173671	0.00781286	AT2G38120, AT3G26810, AT4G24390, AT4G02980, AT5G49980	2054	8	18171	5.52915	0.686427
GOTERM_MF_DIRECT	GO:0016301~kinase activity	144	5.00174	0.00678573	AT1G73670, AT1G60800, AT5G01020, AT5G25910, AT2G23770, AT3G50000, AT5G43020, AT3G13690, AT3G44200, AT5G07180, AT4G24480, AT3G46280, AT5G58140, AT1G04400, AT2G45910, AT3G57530, AT1G73660, AT4G11845, AT5G56790, AT5G41730, AT2G31800, AT4G21940, AT5G63370, AT1G71410, AT4G36280, AT5G56890, AT1G16670, AT3G01490, AT5G38240, AT3G04810, AT5G59650, AT1G73690, AT1G50700, AT1G67510, AT1G29750, AT1G18670, AT2…	2054	1039	18171	1.2261	0.691035
GOTERM_MF_DIRECT	GO:0004722~protein serine/threonine phosphatase activity	28	0.97256	0.00962448	AT4G31860, AT3G52810, AT5G54260, AT3G47810, AT1G18030, AT5G02760, AT2G40180, AT2G35350, AT1G48040, AT3G17250, AT2G39840, AT1G50370, AT2G03450, AT2G20050, AT1G48120, AT3G16560, AT1G69960, AT5G01700, AT3G15260, AT5G27840, AT4G24730, AT2G20630, AT3G20500, AT1G14700, AT4G03080, AT3G19980, AT3G10150, AT1G51690	2054	150	18171	1.65137	0.713838
GOTERM_MF_DIRECT	GO:0004832~valine-tRNA ligase activity	4	0.138937	0.0120756	AT1G27160, AT1G14610, AT5G16715, AT1G28350	2054	5	18171	7.07731	0.715617
GOTERM_MF_DIRECT	GO:0004004~ATP-dependent RNA helicase activity	18	0.625217	0.0166227	AT1G48650, AT5G63630, AT5G51280, AT1G27090, AT4G09730, AT3G22330, AT3G06980, AT1G59760, AT5G19210, AT2G35340, AT4G01020, AT2G06990, AT5G10370, AT1G32490, AT3G09720, AT1G06670, AT5G11200, AT5G11170	2054	87	18171	1.83034	0.793445
GOTERM_MF_DIRECT	GO:0005543~phospholipid binding	8	0.277874	0.0389163	AT1G70810, AT3G61190, AT2G35350, AT3G20320, AT5G07120, AT2G45540, AT5G37740, AT2G01540	2054	29	18171	2.44045	0.845477
GOTERM_MF_DIRECT	GO:0003725~double-stranded RNA binding	7	0.24314	0.0384223	AT1G24450, AT2G28380, AT3G26932, AT1G15910, AT4G21670, AT5G11200, AT5G11170	2054	23	18171	2.69246	0.854998
GOTERM_MF_DIRECT	GO:0015079~potassium ion transmembrane transporter activity	7	0.24314	0.0384223	AT1G70300, AT2G19600, AT1G31120, AT1G60160, AT4G00630, AT2G40540, AT5G14880	2054	23	18171	2.69246	0.854998
GOTERM_MF_DIRECT	GO:0000104~succinate dehydrogenase activity	4	0.138937	0.0355157	AT5G66760, AT5G09600, AT4G32210, AT5G40650	2054	7	18171	5.05522	0.860524
GOTERM_MF_DIRECT	GO:0008142~oxysterol binding	5	0.173671	0.0382038	AT4G22540, AT5G59420, AT3G09300, AT4G12460, AT4G25850	2054	12	18171	3.6861	0.866787
GOTERM_MF_DIRECT	GO:0016881~acid-amino acid ligase activity	3	0.104203	0.0353977	AT5G06460, AT1G63680, AT5G19180	2054	3	18171	8.84664	0.8741
GOTERM_MF_DIRECT	GO:0003713~transcription coactivator activity	11	0.382077	0.030158	AT4G02110, AT3G47610, AT3G24500, AT2G32700, AT3G58680, AT5G28640, AT4G00850, AT2G20410, AT2G42680, AT5G43130, AT1G55300	2054	46	18171	2.1155	0.879116
GOTERM_MF_DIRECT	GO:0016788~hydrolase activity, acting on ester bonds	23	0.798889	0.0343521	AT1G52695, AT5G42170, AT1G54030, AT1G67830, AT3G03520, AT3G27325, AT5G45920, AT1G35290, AT1G53920, AT5G17670, AT3G16175, AT5G15720, AT5G45910, AT3G05180, AT1G28660, AT3G10870, AT2G30720, AT1G28570, AT3G51420, AT4G37140, AT1G53580, AT2G41290, AT1G07230	2054	130	18171	1.56517	0.880949
GOTERM_MF_DIRECT	GO:0005525~GTP binding	45	1.56304	0.028603	AT1G17470, AT5G59150, AT5G47200, AT3G51160, AT4G15810, AT1G64990, AT3G46060, AT5G59840, AT1G03160, AT1G18070, AT1G36730, AT4G02260, AT5G67560, AT5G64300, AT3G18820, AT4G02790, AT1G56070, AT5G45130, AT5G52210, AT3G49725, AT1G04820, AT5G62690, AT1G43890, AT4G20360, AT1G22740, AT2G44070, AT3G21700, AT4G09720, AT3G17470, AT2G16640, AT4G39990, AT5G65270, AT1G75840, AT4G02510, AT4G19640, AT5G20010, AT1…	2054	292	18171	1.36335	0.88298
GOTERM_MF_DIRECT	GO:0046872~metal ion binding	207	7.19	0.0249572	AT5G22060, AT4G21850, AT4G06634, AT2G41220, AT3G46200, AT1G10930, AT3G57670, AT3G02090, AT1G48040, AT1G27730, AT4G13710, AT4G21840, AT4G38240, AT3G19000, AT1G05350, AT5G43170, AT5G35360, AT5G18550, AT5G37740, AT3G16560, AT2G20630, AT1G27360, AT2G01650, AT2G25740, AT1G71695, AT2G39810, AT3G61400, AT4G32690, AT4G16765, AT3G49120, AT5G04130, AT1G06450, AT1G75200, AT4G21830, AT4G21585, AT3G25585, AT5…	2054	1606	18171	1.14026	0.886944
GOTERM_MF_DIRECT	GO:0004721~phosphoprotein phosphatase activity	13	0.451546	0.0341099	AT2G39840, AT2G25050, AT2G01830, AT1G50370, AT1G29770, AT2G20050, AT5G58003, AT4G03080, AT1G48120, AT1G27320, AT3G19980, AT4G21670, AT1G69960	2054	60	18171	1.91677	0.894072
GOTERM_MF_DIRECT	GO:0016787~hydrolase activity	70	2.4314	0.028047	AT1G80280, AT2G44970, AT4G26190, AT5G47240, AT3G63240, AT4G26850, AT4G15810, AT1G68720, AT1G79690, AT1G44760, AT3G46200, AT1G07200, AT2G02970, AT1G68760, AT5G58200, AT3G13690, AT5G39220, AT5G19990, AT1G15040, AT4G12790, AT5G44730, AT1G51760, AT3G53230, AT1G73540, AT5G02970, AT5G09430, AT4G25770, AT5G47740, AT2G27600, AT4G24730, AT1G07670, AT4G37140, AT5G53850, AT1G18300, AT1G12880, AT4G19420, AT5…	2054	487	18171	1.27159	0.896158
GOTERM_MF_DIRECT	GO:0015171~amino acid transmembrane transporter activity	13	0.451546	0.0583746	AT1G47670, AT2G38120, AT5G49630, AT2G28900, AT3G54830, AT2G41700, AT5G01240, AT5G23810, AT2G39890, AT3G01760, AT2G21050, AT2G41190, AT1G31820	2054	65	18171	1.76933	0.9171
GOTERM_MF_DIRECT	GO:0016874~ligase activity	39	1.35464	0.0582395	AT3G06140, AT1G67530, AT5G67530, AT1G29340, AT2G39810, AT1G56040, AT2G45920, AT1G77550, AT1G63680, AT2G44950, AT4G27960, AT4G37390, AT2G40830, AT5G37930, AT3G49810, AT1G76390, AT1G20510, AT2G15530, AT3G46620, AT3G19950, AT2G45910, AT5G13530, AT4G24015, AT5G19080, AT5G45100, AT5G15400, AT5G05230, AT5G41580, AT5G62560, AT5G60410, AT3G19380, AT1G63900, AT3G07370, AT4G36800, AT4G34030, AT3G56580, AT5…	2054	260	18171	1.327	0.924806
GOTERM_MF_DIRECT	GO:0003887~DNA-directed DNA polymerase activity	7	0.24314	0.0655807	AT2G13840, AT5G67100, AT4G18820, AT3G20540, AT1G67630, AT2G02480, AT1G14460	2054	26	18171	2.38179	0.925737
GOTERM_MF_DIRECT	GO:0008757~S-adenosylmethionine-dependent methyltransferase activity	20	0.694686	0.0573342	AT4G10760, AT4G02405, AT2G43910, AT3G61210, AT5G49810, AT4G00750, AT5G37170, AT2G32170, AT1G77530, AT3G44860, AT1G21110, AT1G21120, AT2G40280, AT3G44870, AT5G14430, AT5G64030, AT1G02100, AT3G23300, AT1G29790, AT1G23360	2054	115	18171	1.53855	0.929838
GOTERM_MF_DIRECT	GO:0015631~tubulin binding	4	0.138937	0.0717984	AT3G60740, AT5G06680, AT5G49510, AT1G80260	2054	9	18171	3.93184	0.929989
GOTERM_MF_DIRECT	GO:0036002~pre-mRNA binding	3	0.104203	0.0655216	AT1G07360, AT5G04210, AT5G07060	2054	4	18171	6.63498	0.932636
GOTERM_MF_DIRECT	GO:0005034~osmosensor activity	3	0.104203	0.0655216	AT2G17820, AT2G01830, AT1G27320	2054	4	18171	6.63498	0.932636
GOTERM_MF_DIRECT	GO:0015293~symporter activity	12	0.416811	0.0708962	AT5G01240, AT2G26690, AT1G77990, AT5G45380, AT2G38120, AT5G49630, AT5G23810, AT1G69850, AT3G54700, AT1G23090, AT2G21050, AT1G31820	2054	60	18171	1.76933	0.934004
GOTERM_MF_DIRECT	GO:0008565~protein transporter activity	17	0.590483	0.0772491	AT1G30630, AT5G63640, AT2G31660, AT4G23460, AT4G12120, AT3G47810, AT1G48760, AT1G12360, AT1G12930, AT4G24840, AT5G22640, AT4G16143, AT1G23900, AT2G45070, AT5G22770, AT3G09740, AT5G22780	2054	97	18171	1.55044	0.937567
GOTERM_MF_DIRECT	GO:0003724~RNA helicase activity	5	0.173671	0.0802755	AT5G47010, AT2G06990, AT1G05460, AT1G59760, AT3G06980	2054	15	18171	2.94888	0.938816
GOTERM_MF_DIRECT	GO:0008559~xenobiotic-transporting ATPase activity	5	0.173671	0.0978571	AT3G60160, AT1G30420, AT3G62700, AT3G21250, AT2G47800	2054	16	18171	2.76458	0.964237
GOTERM_CC_DIRECT	GO:0005886~plasma membrane	544	18.8954	1.74935e-16	AT1G62740, AT2G46710, AT4G31130, AT5G22060, AT1G68720, AT2G23770, AT4G12460, AT5G43020, AT1G78110, AT2G36910, AT3G13690, AT3G45720, AT4G35350, AT1G69480, AT1G23080, AT2G26730, AT1G75500, AT2G37930, AT2G38120, AT1G22740, AT1G68710, AT4G11845, AT5G53390, AT5G37740, AT3G63080, AT3G16760, AT2G30080, AT4G38730, AT5G59650, AT2G43910, AT5G03280, AT1G69220, AT5G07150, AT1G80640, AT4G32690, AT2G30700, AT3…	2687	3702	25147	1.37525	8.88178e-14
GOTERM_CC_DIRECT	GO:0005829~cytosol	323	11.2192	1.60189e-07	AT1G62740, AT5G22060, AT4G21850, AT5G47200, AT5G27380, AT4G14930, AT1G27090, AT3G50000, AT5G59840, AT5G11520, AT2G38680, AT3G46200, AT1G80460, AT5G63980, AT4G19490, AT2G05920, AT1G15040, AT5G28900, AT4G21840, AT1G30630, AT2G23110, AT1G05350, AT1G61730, AT5G12040, AT5G16715, AT3G14420, AT5G35360, AT5G13680, AT4G38430, AT5G47010, AT2G45980, AT5G39510, AT1G23490, AT1G71410, AT5G01520, AT4G34890, AT1…	2687	2309	25147	1.30917	3.20373e-05
GOTERM_CC_DIRECT	GO:0005789~endoplasmic reticulum membrane	72	2.50087	5.03931e-05	AT3G17440, AT3G28490, AT5G42570, AT3G10660, AT5G47200, AT2G46170, AT2G37975, AT1G76520, AT1G64990, AT1G71830, AT4G21810, AT2G31710, AT3G12120, AT1G48440, AT2G32440, AT1G57750, AT1G50430, AT1G08820, AT4G35580, AT1G20270, AT1G21460, AT2G15090, AT4G36380, AT2G38960, AT1G68370, AT5G01990, AT4G11220, AT4G22200, AT1G16400, AT2G45980, AT5G39510, AT1G06080, AT3G51460, AT1G05360, AT3G03160, AT5G45160, AT5…	2687	417	25147	1.6159	0.00669672
GOTERM_CC_DIRECT	GO:0005794~Golgi apparatus	174	6.04377	7.5594e-05	AT2G28520, AT5G47200, AT3G56820, AT2G34730, AT1G64990, AT2G32530, AT5G59840, AT3G47810, AT4G33380, AT2G34940, AT4G31340, AT1G62330, AT4G19490, AT2G05070, AT2G05920, AT4G01210, AT2G46180, AT3G11320, AT5G58140, AT4G23710, AT3G23300, AT4G38240, AT2G38120, AT1G50430, AT1G20270, AT4G09720, AT1G28490, AT5G49900, AT5G19160, AT5G15470, AT4G11220, AT2G21770, AT5G14430, AT5G20010, AT2G28315, AT1G23490, AT5…	2687	1226	25147	1.32824	0.00753119
GOTERM_CC_DIRECT	GO:0009506~plasmodesma	144	5.00174	0.000242747	AT5G22060, AT5G42570, AT1G66280, AT1G45145, AT5G23400, AT2G19760, AT3G02420, AT1G79280, AT5G59840, AT1G10930, AT5G08080, AT2G36910, AT2G05920, AT5G53430, AT5G66310, AT1G23080, AT1G54030, AT3G57530, AT2G20190, AT2G27170, AT2G38010, AT1G51570, AT3G14420, AT5G47010, AT2G27600, AT1G29150, AT3G45630, AT1G68790, AT1G71695, AT1G73590, AT3G61820, AT3G52470, AT5G37630, AT5G26260, AT2G41100, AT5G37830, AT5…	2687	1008	25147	1.33697	0.0192347
GOTERM_CC_DIRECT	GO:0005802~trans-Golgi network	50	1.73671	0.000362497	AT2G28520, AT3G56820, AT3G21190, AT1G61250, AT5G08080, AT5G26240, AT1G62330, AT1G69480, AT4G01210, AT3G04080, AT3G23300, AT3G27870, AT5G13530, AT4G38240, AT1G68710, AT1G20270, AT1G08040, AT1G13980, AT1G28490, AT5G45550, AT3G02350, AT5G10840, AT5G14430, AT5G39510, AT1G74800, AT1G09330, AT4G38200, AT5G23850, AT5G11730, AT5G66120, AT1G69220, AT5G18280, AT5G44790, AT5G64030, AT3G53520, AT3G13772, AT3…	2687	280	25147	1.67121	0.0238811
GOTERM_CC_DIRECT	GO:0005768~endosome	50	1.73671	0.000548585	AT5G23850, AT2G28520, AT5G59150, AT3G56820, AT2G38020, AT3G21190, AT5G11730, AT5G54280, AT5G66120, AT5G18280, AT1G61250, AT1G62330, AT5G44790, AT5G64030, AT3G53520, AT5G45130, AT4G01210, AT3G04080, AT3G23300, AT3G13772, AT4G36290, AT2G38120, AT4G38240, AT1G04760, AT1G20270, AT1G21480, AT1G08040, AT3G66654, AT3G61210, AT4G00750, AT2G33120, AT1G13980, AT5G65270, AT4G16650, AT3G02350, AT3G62830, AT3…	2687	285	25147	1.64189	0.0308698
GOTERM_CC_DIRECT	GO:0016021~integral component of membrane	645	22.4036	0.00103108	AT4G31130, AT3G04220, AT1G34630, AT4G13270, AT5G53280, AT3G27325, AT2G23770, AT5G43020, AT1G19770, AT3G51640, AT2G34940, AT1G20510, AT2G36910, AT4G10080, AT3G45720, AT1G62330, AT1G69480, AT3G10280, AT4G38640, AT5G07180, AT3G11530, AT4G01210, AT2G46320, AT5G18140, AT1G23080, AT1G19380, AT2G26730, AT1G75500, AT2G37530, AT2G38120, AT4G38240, AT3G25180, AT1G68710, AT5G53390, AT2G41231, AT2G30080, AT1…	2687	5439	25147	1.10984	0.0502731
GOTERM_CC_DIRECT	GO:0005773~vacuole	92	3.19555	0.00167179	AT4G20830, AT2G28520, AT3G11780, AT1G20620, AT4G35300, AT2G28900, AT5G05480, AT4G16190, AT1G79690, AT4G32150, AT5G13690, AT1G52570, AT2G01540, AT4G24840, AT4G26140, AT2G39780, AT3G22845, AT2G02040, AT3G11530, AT3G13750, AT1G76020, AT4G23710, AT1G16010, AT1G09010, AT3G05500, AT1G04400, AT1G54030, AT2G18960, AT1G15530, AT1G22740, AT2G38170, AT2G47800, AT3G52840, AT5G06450, AT2G39300, AT1G24450, AT1…	2687	629	25147	1.36885	0.0716664
GOTERM_CC_DIRECT	GO:0009536~plastid	50	1.73671	0.00211514	AT2G28900, AT1G08530, AT4G39940, AT2G41220, AT5G11520, AT3G63110, AT3G24506, AT4G30010, AT2G06010, AT2G44640, AT1G05200, AT4G00630, AT3G58990, AT3G08710, AT2G16640, AT5G08540, AT2G18280, AT1G31180, AT1G53760, AT2G42770, AT1G47580, AT5G42960, AT4G39030, AT2G45150, AT1G55160, AT3G20320, AT2G43950, AT2G43090, AT1G61120, AT4G24620, AT5G53170, AT5G24690, AT3G01280, AT4G20360, AT1G30270, AT5G64280, AT3…	2687	303	25147	1.54435	0.0812077
GOTERM_CC_DIRECT	GO:0000325~plant-type vacuole	12	0.416811	0.00247625	AT3G03000, AT2G28520, AT5G46860, AT4G35350, AT1G15690, AT2G02040, AT5G39510, AT4G14630, AT3G62700, AT3G21250, AT2G47800, AT1G75820	2687	40	25147	2.80763	0.0862124
GOTERM_CC_DIRECT	GO:0016020~membrane	229	7.95415	0.0028792	AT5G44210, AT1G19770, AT5G11520, AT3G02090, AT3G45720, AT1G79710, AT3G13160, AT1G71900, AT1G23080, AT1G75500, AT2G38120, AT3G25180, AT3G14420, AT4G21940, AT1G16400, AT2G28315, AT4G38730, AT1G71410, AT2G01650, AT4G23030, AT4G01630, AT1G71695, AT1G71140, AT5G38840, AT1G21900, AT2G37640, AT5G14040, AT4G12300, AT1G12950, AT3G53520, AT1G76400, AT3G06435, AT4G28700, AT1G02500, AT4G14965, AT2G46740, AT2…	2687	1797	25147	1.19263	0.0916376
GOTERM_CC_DIRECT	GO:0005769~early endosome	9	0.312609	0.00447405	AT5G13530, AT4G19640, AT4G38730, AT5G11960, AT1G71900, AT1G69220, AT5G54440, AT3G43300, AT5G45550	2687	26	25147	3.23957	0.120249
GOTERM_CC_DIRECT	GO:0005774~vacuolar membrane	78	2.70927	0.00436731	AT3G26810, AT5G42570, AT5G60640, AT4G35300, AT3G27325, AT4G32150, AT3G02090, AT3G27020, AT2G41700, AT4G31340, AT2G05070, AT2G02040, AT1G56070, AT5G45130, AT3G21250, AT1G04820, AT4G23710, AT3G23300, AT2G44640, AT1G75500, AT1G22840, AT3G49360, AT3G18620, AT1G30630, AT2G38170, AT4G09720, AT2G47800, AT5G07440, AT4G14880, AT5G06450, AT1G76800, AT5G10840, AT1G53760, AT5G14430, AT5G11670, AT5G39510, AT5…	2687	536	25147	1.36191	0.125998
GOTERM_CC_DIRECT	GO:0005622~intracellular	89	3.09135	0.00637494	AT1G73670, AT3G11780, AT3G24500, AT5G44210, AT5G47200, AT5G09890, AT2G31200, AT5G33280, AT5G59840, AT5G25760, AT5G26240, AT5G53570, AT5G08080, AT5G49910, AT2G47890, AT5G63980, AT2G39780, AT5G16760, AT5G67240, AT3G18820, AT4G08170, AT1G42550, AT5G45130, AT5G52210, AT2G20470, AT5G58140, AT5G59880, AT3G02460, AT2G26370, AT1G54030, AT1G16540, AT1G43890, AT1G22740, AT3G21700, AT1G06040, AT1G69250, AT1…	2687	634	25147	1.31377	0.156793
GOTERM_CC_DIRECT	GO:0009524~phragmoplast	19	0.659951	0.00713906	AT3G10380, AT1G27920, AT2G20190, AT2G19760, AT5G05970, AT5G40740, AT3G47690, AT1G12360, AT1G05560, AT1G75840, AT1G71820, AT4G21270, AT2G35630, AT1G17210, AT3G19960, AT3G23670, AT3G53230, AT5G67470, AT1G50240	2687	91	25147	1.95403	0.163992
GOTERM_CC_DIRECT	GO:0005763~mitochondrial small ribosomal subunit	6	0.208406	0.00853685	AT3G03600, AT3G22300, AT1G16870, AT4G21460, AT3G18240, AT1G64880	2687	13	25147	4.31943	0.182684
GOTERM_CC_DIRECT	GO:0031901~early endosome membrane	6	0.208406	0.0121273	AT4G19640, AT1G04760, AT2G33120, AT1G09330, AT4G39990, AT3G43300	2687	14	25147	4.0109	0.237493
GOTERM_CC_DIRECT	GO:0005778~peroxisomal membrane	11	0.382077	0.013442	AT5G04870, AT5G08470, AT1G29260, AT5G27520, AT5G12390, AT4G27780, AT3G21865, AT5G25760, AT2G42770, AT3G24570, AT2G45690	2687	43	25147	2.3941	0.247917
GOTERM_CC_DIRECT	GO:0005634~nucleus	1099	38.173	0.0156263	AT1G73670, AT3G26810, AT1G34630, AT4G13270, AT5G02560, AT4G12460, AT1G78110, AT2G19090, AT2G46610, AT3G51640, AT4G36870, AT3G52250, AT4G10080, AT1G12140, AT4G35350, AT1G47420, AT2G15530, AT5G55600, AT5G28900, AT2G34830, AT2G01260, AT5G42300, AT1G73660, AT3G10550, AT2G23760, AT4G26960, AT5G53390, AT2G20635, AT1G09530, AT5G37740, AT1G75230, AT4G23570, AT2G02310, AT5G38840, AT1G28420, AT4G37750, AT1…	2687	9796	25147	1.04995	0.270206
GOTERM_CC_DIRECT	GO:0009507~chloroplast	451	15.6652	0.016728	AT5G42570, AT1G68720, AT1G27090, AT2G23770, AT2G41220, AT5G11520, AT5G14060, AT1G20510, AT3G55010, AT5G63980, AT4G19490, AT5G18140, AT3G25180, AT4G34730, AT5G61190, AT5G12040, AT1G62870, AT2G15820, AT2G02410, AT1G65230, AT4G38730, AT5G28350, AT1G05360, AT2G01918, AT1G47580, AT1G50790, AT5G14040, AT4G13830, AT4G12300, AT3G28080, AT3G06430, AT3G54650, AT2G36000, AT1G68730, AT3G26840, AT5G38830, AT3…	2687	3855	25147	1.09489	0.274811
GOTERM_CC_DIRECT	GO:0005783~endoplasmic reticulum	94	3.26502	0.017926	AT3G48350, AT5G42570, AT1G66280, AT1G60995, AT5G60640, AT2G46170, AT3G27325, AT3G02420, AT3G07140, AT4G31340, AT2G39780, AT3G22845, AT5G19290, AT5G45130, AT3G12120, AT1G51760, AT1G48440, AT4G22330, AT3G18490, AT3G11320, AT5G39650, AT2G32440, AT1G23080, AT5G24810, AT3G21550, AT1G57750, AT1G54030, AT1G51570, AT1G21460, AT2G15090, AT2G38960, AT3G63080, AT1G08750, AT4G28485, AT4G11220, AT2G45980, AT1…	2687	703	25147	1.25139	0.280273
GOTERM_CC_DIRECT	GO:0005618~cell wall	80	2.77874	0.0189499	AT1G20620, AT5G64100, AT5G60640, AT2G19760, AT5G23400, AT5G58480, AT5G27430, AT2G40830, AT3G02090, AT5G66760, AT4G26140, AT1G30600, AT2G05920, AT1G02810, AT3G10080, AT3G13750, AT1G04820, AT1G76020, AT5G65430, AT3G22800, AT4G30690, AT5G62690, AT3G10720, AT5G20630, AT1G26770, AT3G06130, AT5G02490, AT1G51570, AT5G19730, AT1G75750, AT2G44350, AT1G68560, AT5G56030, AT3G22330, AT3G52840, AT1G71380, AT3…	2687	588	25147	1.2733	0.283033
GOTERM_CC_DIRECT	GO:0005749~mitochondrial respiratory chain complex II, succinate dehydrogenase complex (ubiquinone)	5	0.173671	0.0231389	AT5G66760, AT5G09600, AT1G47420, AT4G32210, AT5G40650	2687	11	25147	4.25398	0.323066
GOTERM_CC_DIRECT	GO:0071006~U2-type catalytic step 1 spliceosome	4	0.138937	0.0306135	AT1G80930, AT1G07360, AT5G04210, AT5G07060	2687	7	25147	5.34787	0.391933
GOTERM_CC_DIRECT	GO:0030140~trans-Golgi network transport vesicle	4	0.138937	0.0306135	AT5G46860, AT5G39510, AT5G13300, AT1G28490	2687	7	25147	5.34787	0.391933
GOTERM_CC_DIRECT	GO:0009898~cytoplasmic side of plasma membrane	4	0.138937	0.0451547	AT2G43850, AT3G45780, AT5G06680, AT5G58140	2687	8	25147	4.67938	0.459942
GOTERM_CC_DIRECT	GO:0031965~nuclear membrane	9	0.312609	0.0444372	AT1G12930, AT3G13360, AT1G79280, AT1G33410, AT3G63110, AT1G15110, AT4G38580, AT4G26455, AT1G68790	2687	38	25147	2.21655	0.465788
GOTERM_CC_DIRECT	GO:0005737~cytoplasm	504	17.5061	0.0434514	AT1G62740, AT2G46710, AT1G61210, AT5G22060, AT4G26850, AT2G31200, AT4G37390, AT1G28350, AT1G12930, AT5G63980, AT2G27660, AT5G28900, AT5G42300, AT3G19000, AT2G27170, AT1G05350, AT1G03350, AT3G47690, AT5G11930, AT5G23590, AT2G31800, AT5G63990, AT1G27160, AT1G09470, AT4G29720, AT2G46310, AT2G20560, AT1G05320, AT2G43910, AT1G69220, AT1G05460, AT1G05470, AT3G13670, AT1G06450, AT3G17510, AT1G62450, AT2…	2687	4407	25147	1.0703	0.469865
GOTERM_CC_DIRECT	GO:0005887~integral component of plasma membrane	40	1.38937	0.0405832	AT5G45380, AT1G78560, AT1G17120, AT5G42570, AT4G35300, AT3G18220, AT1G08890, AT2G24610, AT2G34940, AT5G51060, AT5G53190, AT1G01340, AT5G44790, AT2G20780, AT5G27360, AT3G54700, AT1G55350, AT1G64060, AT1G48440, AT1G07810, AT4G28700, AT1G31820, AT3G19930, AT5G23660, AT2G29900, AT1G77990, AT2G18960, AT5G53130, AT1G21460, AT4G10770, AT4G21480, AT2G38290, AT4G16480, AT1G64780, AT4G22200, AT1G23090, AT1…	2687	275	25147	1.36127	0.471324
GOTERM_CC_DIRECT	GO:0045273~respiratory chain complex II	5	0.173671	0.0421843	AT5G66760, AT5G09600, AT1G47420, AT4G32210, AT5G40650	2687	13	25147	3.59952	0.471925
GOTERM_CC_DIRECT	GO:0048471~perinuclear region of cytoplasm	5	0.173671	0.0421843	AT1G05560, AT5G23570, AT3G55850, AT1G49340, AT2G39260	2687	13	25147	3.59952	0.471925
GOTERM_CC_DIRECT	GO:0071007~U2-type catalytic step 2 spliceosome	3	0.104203	0.0590807	AT1G07360, AT5G04210, AT5G07060	2687	4	25147	7.01907	0.544235
GOTERM_CC_DIRECT	GO:0031902~late endosome membrane	11	0.382077	0.0640431	AT3G17440, AT5G46860, AT2G38020, AT5G39510, AT1G16240, AT3G49990, AT4G32150, AT5G65687, AT1G28490, AT3G47810, AT2G34940	2687	55	25147	1.87175	0.551682
GOTERM_CC_DIRECT	GO:0010008~endosome membrane	14	0.48628	0.0636221	AT5G59150, AT5G45560, AT2G24170, AT1G32410, AT3G10550, AT1G13980, AT5G10840, AT1G10950, AT1G15690, AT1G16240, AT1G01650, AT1G55350, AT4G29160, AT3G13772	2687	77	25147	1.70159	0.560317
GOTERM_CC_DIRECT	GO:0000139~Golgi membrane	48	1.66725	0.0713839	AT2G24170, AT5G47200, AT1G64990, AT2G32530, AT5G46340, AT3G46060, AT3G09320, AT5G18280, AT2G19950, AT2G34940, AT1G02730, AT4G19490, AT4G39180, AT2G29050, AT5G64030, AT3G04080, AT3G23300, AT3G13772, AT3G27870, AT2G29900, AT5G44670, AT4G31590, AT4G38240, AT4G01750, AT1G30630, AT1G68710, AT4G26940, AT3G28340, AT4G00750, AT2G13650, AT1G68370, AT1G48760, AT1G27120, AT3G02350, AT2G37585, AT5G15470, AT3…	2687	355	25147	1.26541	0.58159
GOTERM_CC_DIRECT	GO:0005730~nucleolus	56	1.94512	0.0851103	AT3G04230, AT3G24500, AT4G31580, AT2G19760, AT1G79280, AT3G50000, AT3G16810, AT1G73870, AT3G02090, AT1G56070, AT2G42680, AT3G53230, AT5G61330, AT2G39260, AT5G11170, AT5G62690, AT3G14190, AT1G48380, AT1G48620, AT2G37630, AT1G61730, AT1G11400, AT3G18165, AT2G43650, AT3G22330, AT1G59760, AT4G18040, AT1G75840, AT2G33040, AT1G04230, AT1G68790, AT1G72320, AT1G14850, AT5G54640, AT3G21430, AT1G79880, AT2…	2687	428	25147	1.22451	0.617735
GOTERM_CC_DIRECT	GO:0090404~pollen tube tip	5	0.173671	0.0831387	AT5G36925, AT3G21700, AT3G51460, AT1G17140, AT5G49680	2687	16	25147	2.92461	0.618801
GOTERM_CC_DIRECT	GO:0000974~Prp19 complex	5	0.173671	0.0831387	AT1G07360, AT3G13210, AT5G04210, AT3G18165, AT5G07060	2687	16	25147	2.92461	0.618801
GOTERM_CC_DIRECT	GO:0005663~DNA replication factor C complex	4	0.138937	0.0823642	AT1G77470, AT4G18820, AT2G02480, AT1G14460	2687	10	25147	3.74351	0.625566
GOTERM_CC_DIRECT	GO:0030139~endocytic vesicle	3	0.104203	0.0915955	AT3G59420, AT4G19640, AT5G45130	2687	5	25147	5.61526	0.636224
GOTERM_CC_DIRECT	GO:0032585~multivesicular body membrane	3	0.104203	0.0915955	AT3G59420, AT2G27600, AT5G07120	2687	5	25147	5.61526	0.636224
GOTERM_CC_DIRECT	GO:0009360~DNA polymerase III complex	3	0.104203	0.0915955	AT4G18820, AT2G02480, AT1G14460	2687	5	25147	5.61526	0.636224
GOTERM_CC_DIRECT	GO:0046930~pore complex	5	0.173671	0.0999188	AT2G43950, AT5G67500, AT3G01280, AT2G28900, AT5G42960	2687	17	25147	2.75258	0.651007
GOTERM_CC_DIRECT	GO:0005743~mitochondrial inner membrane	25	0.868357	0.0998172	AT5G48970, AT1G08220, AT1G72820, AT3G02090, AT2G45270, AT5G14040, AT3G03070, AT5G66760, AT1G14560, AT5G27520, AT2G46320, AT5G56450, AT5G06220, AT5G53170, AT4G39690, AT4G05020, AT1G19140, AT5G09470, AT4G32210, AT5G01500, AT5G09600, AT5G15640, AT1G51980, AT1G02410, AT5G26200	2687	171	25147	1.36824	0.659908
KEGG_PATHWAY	ath04120:Ubiquitin mediated proteolysis	29	1.00729	0.00978245	AT3G21840, AT5G50430, AT5G02880, AT5G67530, AT3G08690, AT5G06460, AT4G27960, AT5G37930, AT3G13550, AT1G02980, AT2G20000, AT3G20060, AT4G10180, AT4G11920, AT1G21410, AT5G50870, AT2G39090, AT4G34210, AT3G60010, AT2G21470, AT5G15400, AT2G03190, AT5G41580, AT3G07370, AT4G36800, AT5G18650, AT5G25560, AT1G64230, AT5G19180	569	149	4727	1.61691	0.448301
KEGG_PATHWAY	ath00531:Glycosaminoglycan degradation	4	0.138937	0.0416618	AT5G13690, AT1G72990, AT3G52840, AT1G65590	569	7	4727	4.74718	0.576068
KEGG_PATHWAY	ath04144:Endocytosis	26	0.903091	0.0302172	AT1G01960, AT3G53710, AT3G46060, AT5G59840, AT5G13300, AT1G52570, AT3G47810, AT5G49910, AT3G18820, AT4G29160, AT5G46750, AT2G36680, AT1G77740, AT5G22780, AT5G02490, AT1G22740, AT3G09920, AT4G09720, AT1G13980, AT4G19003, AT5G65270, AT2G27600, AT1G23490, AT5G22770, AT4G38200, AT3G08530	569	142	4727	1.5211	0.604722
KEGG_PATHWAY	ath04626:Plant-pathogen interaction	28	0.97256	0.0377747	AT1G66400, AT3G10660, AT1G50700, AT2G41100, AT5G04170, AT5G45260, AT2G24610, AT1G80460, AT5G51060, AT1G01340, AT3G56800, AT1G64060, AT3G57530, AT3G10190, AT4G37010, AT2G41110, AT5G53130, AT1G12220, AT2G30250, AT4G35310, AT5G56030, AT3G03000, AT4G21940, AT5G04870, AT4G23650, AT5G56270, AT4G23570, AT3G62220	569	159	4727	1.46297	0.60618
KEGG_PATHWAY	ath00600:Sphingolipid metabolism	9	0.312609	0.00897181	AT3G48780, AT5G19200, AT2G38010, AT1G72990, AT4G22330, AT5G49900, AT3G52840, AT5G23670, AT1G69640	569	26	4727	2.87569	0.663948
KEGG_PATHWAY	ath04070:Phosphatidylinositol signaling system	15	0.521014	0.0288888	AT5G63980, AT5G63990, AT5G61760, AT2G41110, AT5G16760, AT3G10550, AT2G20900, AT4G08170, AT3G09920, AT3G56800, AT1G71010, AT5G58690, AT1G49340, AT5G58670, AT1G77740	569	68	4727	1.83255	0.693441
KEGG_PATHWAY	ath00562:Inositol phosphate metabolism	15	0.521014	0.0288888	AT5G61760, AT3G10550, AT3G03520, AT3G09920, AT1G49340, AT5G63980, AT5G63990, AT5G16760, AT4G08170, AT1G71010, AT5G58730, AT5G58690, AT5G58670, AT1G77740, AT1G07230	569	68	4727	1.83255	0.693441
KEGG_PATHWAY	ath04141:Protein processing in endoplasmic reticulum	35	1.2157	0.0666799	AT3G21840, AT5G22060, AT5G42570, AT5G60640, AT5G50430, AT3G08690, AT1G79650, AT4G27960, AT3G13550, AT5G49910, AT1G02980, AT1G59860, AT4G21810, AT1G76400, AT5G49060, AT3G53230, AT4G34210, AT3G60010, AT5G16090, AT5G02490, AT1G16190, AT5G15400, AT5G56030, AT2G38960, AT2G03190, AT3G63000, AT2G34250, AT3G01340, AT3G07370, AT5G05470, AT2G01650, AT2G45070, AT1G18260, AT5G02150, AT1G64230	569	219	4727	1.32769	0.69664
KEGG_PATHWAY	ath00740:Riboflavin metabolism	4	0.138937	0.0833444	AT3G47390, AT5G64300, AT4G20960, AT2G42070	569	9	4727	3.69225	0.731855

## Sheet: cornflowerblue
Supplementary Data S6. Functional annotation of the co-expression module “cornflowerblue” derived from WGCNA (GO terms and KEGG pathways using DAVID)
Category	Term	Count	%	PValue	Genes	List Total	Pop Hits	Pop Total	Fold Enrichment	Benjamini
GOTERM_BP_DIRECT	GO:0002229~defense response to oomycetes	6	0.78329	0.00271689	AT5G12170, AT1G08720, AT4G02420, AT4G39950, AT3G59740, AT5G26920	534	34	18499	6.11335	0.377955
GOTERM_BP_DIRECT	GO:0010200~response to chitin	12	1.56658	0.00163356	AT3G46090, AT4G39070, AT3G19580, AT5G27420, AT3G28210, AT3G45640, AT2G35930, AT4G33940, AT2G17040, AT5G47220, AT5G67450, AT4G37610	534	133	18499	3.12562	0.434803
GOTERM_BP_DIRECT	GO:0006468~protein phosphorylation	41	5.35248	0.00247387	AT3G54030, AT4G30960, AT5G55910, AT4G03390, AT5G47070, AT1G72300, AT1G66910, AT3G08760, AT1G65800, AT2G37710, AT2G33580, AT5G45800, AT3G57640, AT5G38990, AT4G14350, AT1G53730, AT2G05940, AT4G02420, AT5G46080, AT1G73460, AT1G11340, AT2G46340, AT3G27560, AT3G63260, AT5G07070, AT1G53090, AT5G41680, AT5G58540, AT1G72760, AT3G59740, AT3G46920, AT1G70130, AT3G55950, AT4G38470, AT3G53930, AT1G28390, AT5…	534	870	18499	1.63257	0.438026
GOTERM_BP_DIRECT	GO:0009626~plant-type hypersensitive response	9	1.17493	0.00128015	AT1G51660, AT5G22290, AT5G46180, AT3G45640, AT3G50930, AT5G54250, AT1G77220, AT1G32540, AT5G26920	534	74	18499	4.21326	0.591032
GOTERM_BP_DIRECT	GO:0080167~response to karrikin	10	1.30548	0.0118458	AT5G20250, AT4G39070, AT4G37290, AT5G51550, AT2G01150, AT1G66390, AT3G52360, AT3G55720, AT2G47730, AT2G16660	534	128	18499	2.70643	0.646446
GOTERM_BP_DIRECT	GO:0042742~defense response to bacterium	16	2.08877	0.0144451	AT4G39950, AT3G59740, AT2G47730, AT4G23250, AT5G26920, AT5G17880, AT1G04510, AT3G10525, AT5G22250, AT1G02450, AT5G06320, AT2G05940, AT1G77920, AT4G02420, AT2G30860, AT1G64550	534	276	18499	2.00825	0.676471
GOTERM_BP_DIRECT	GO:0034613~cellular protein localization	3	0.391645	0.0115083	AT1G49480, AT1G65800, AT3G12360	534	6	18499	17.3212	0.684689
GOTERM_BP_DIRECT	GO:0009816~defense response to bacterium, incompatible interaction	6	0.78329	0.00838312	AT5G27420, AT5G46180, AT5G06320, AT3G56710, AT4G14400, AT5G26920	534	44	18499	4.72395	0.691248
GOTERM_BP_DIRECT	GO:0007165~signal transduction	23	3.00261	0.0115061	AT2G42880, AT5G07070, AT1G72950, AT3G04210, AT1G64610, AT4G30960, AT3G14270, AT1G72940, AT3G14720, AT1G72920, AT1G63750, AT3G12360, AT1G66090, AT4G16860, AT1G72900, AT4G32160, AT1G72910, AT2G32660, AT5G64330, AT5G17880, AT3G45640, AT5G58120, AT3G08510	534	450	18499	1.77061	0.7398
GOTERM_BP_DIRECT	GO:0009617~response to bacterium	8	1.04439	0.0280388	AT1G12210, AT3G45640, AT3G50930, AT1G08720, AT5G06320, AT4G14400, AT4G39950, AT5G26920	534	102	18499	2.71704	0.835461
GOTERM_BP_DIRECT	GO:0006952~defense response	29	3.7859	0.0266728	AT1G12210, AT5G47910, AT1G72940, AT5G05170, AT1G72920, AT1G65800, AT4G16860, AT1G72900, AT2G47730, AT2G43590, AT1G11340, AT5G58120, AT2G30860, AT1G66250, AT1G72950, AT3G04210, AT1G61180, AT2G35930, AT1G63750, AT1G66090, AT4G39950, AT1G59124, AT1G72910, AT4G38700, AT5G17880, AT2G32660, AT1G11310, AT5G43740, AT1G65870	534	658	18499	1.52679	0.84848
GOTERM_BP_DIRECT	GO:0009864~induced systemic resistance, jasmonic acid mediated signaling pathway	3	0.391645	0.0383652	AT2G46370, AT2G41370, AT5G47220	534	11	18499	9.44791	0.897255
GOTERM_BP_DIRECT	GO:0070475~rRNA base methylation	3	0.391645	0.0679305	AT5G10910, AT5G26180, AT2G39670	534	15	18499	6.92846	0.977112
GOTERM_BP_DIRECT	GO:0010224~response to UV-B	5	0.652742	0.0988007	AT2G46370, AT3G45640, AT4G36220, AT4G38620, AT5G26920	534	61	18499	2.83953	0.994409
GOTERM_MF_DIRECT	GO:0043531~ADP binding	14	1.82768	0.00154883	AT1G72950, AT3G04210, AT1G61180, AT1G12210, AT1G72940, AT1G63750, AT4G16860, AT1G66090, AT1G72900, AT1G72910, AT1G59124, AT5G17880, AT5G43740, AT5G58120	534	170	18171	2.80231	0.278957
GOTERM_MF_DIRECT	GO:0005515~protein binding	76	9.92167	0.00474563	AT3G21510, AT3G58040, AT5G55910, AT4G16250, AT5G47910, AT1G72300, AT1G10120, AT5G05170, AT3G12360, AT4G14830, AT3G63010, AT1G01160, AT5G22290, AT2G33580, AT3G10525, AT2G17620, AT2G22540, AT3G47430, AT1G53090, AT4G14550, AT4G14410, AT1G67230, AT5G57360, AT4G29910, AT3G56710, AT5G51200, AT1G26670, AT2G17870, AT5G64330, AT5G03415, AT1G08720, AT1G49480, AT5G57110, AT4G29820, AT4G11740, AT5G54840, AT1…	534	1901	18171	1.36041	0.330674
GOTERM_MF_DIRECT	GO:0005524~ATP binding	92	12.0104	0.00416533	AT2G42880, AT4G30960, AT3G54030, AT5G55910, AT1G72300, AT3G08760, AT1G66910, AT1G51660, AT3G50930, AT2G33580, AT4G14350, AT1G53730, AT3G16060, AT3G27560, AT5G07070, AT1G61180, AT1G26270, AT1G53090, AT1G04160, AT3G14270, AT5G41680, AT4G29910, AT4G39280, AT3G59740, AT3G46920, AT5G08340, AT5G45930, AT5G64330, AT2G19470, AT4G38470, AT1G19920, AT3G53930, AT3G21240, AT1G28390, AT1G08720, AT5G05450, AT1…	534	2372	18171	1.31981	0.356196
GOTERM_MF_DIRECT	GO:0004672~protein kinase activity	28	3.65535	0.00104587	AT3G54030, AT4G03390, AT5G55910, AT3G08760, AT1G65800, AT3G13380, AT3G45640, AT2G33580, AT5G45800, AT4G14350, AT1G53730, AT3G57640, AT1G73460, AT2G46340, AT3G63260, AT1G53090, AT5G41680, AT5G58540, AT1G72760, AT4G23170, AT3G46920, AT4G23250, AT4G38470, AT3G53930, AT1G08720, AT5G41990, AT3G46290, AT1G70250	534	482	18171	1.97674	0.356986
GOTERM_MF_DIRECT	GO:0016301~kinase activity	47	6.13577	0.00356717	AT3G59110, AT3G54030, AT4G30960, AT5G24352, AT5G55910, AT4G03390, AT5G47070, AT1G12680, AT1G66910, AT3G08760, AT1G65800, AT2G32510, AT2G37710, AT1G80180, AT1G51660, AT3G45640, AT2G33580, AT5G38990, AT4G14350, AT2G05940, AT4G02420, AT5G46080, AT1G73460, AT1G11340, AT3G27560, AT3G63260, AT5G07070, AT1G26270, AT5G41680, AT5G58540, AT5G11360, AT1G72760, AT3G59740, AT5G08340, AT4G23250, AT2G32660, AT1…	534	1039	18171	1.53929	0.395092
GOTERM_MF_DIRECT	GO:0008173~RNA methyltransferase activity	4	0.522193	0.00877677	AT5G26180, AT4G17610, AT4G38020, AT2G39670	534	15	18171	9.07416	0.462069
GOTERM_MF_DIRECT	GO:0004674~protein serine/threonine kinase activity	36	4.69974	0.0128359	AT3G59110, AT4G30960, AT5G55910, AT4G03390, AT5G47070, AT1G72300, AT1G66910, AT1G65800, AT2G37710, AT3G13380, AT1G51660, AT5G37350, AT5G45800, AT3G57640, AT5G38990, AT4G14350, AT1G53730, AT2G05940, AT4G02420, AT5G46080, AT1G11340, AT3G27560, AT5G07070, AT1G16090, AT3G59740, AT4G23250, AT1G70130, AT2G19470, AT3G55950, AT4G38470, AT3G53930, AT1G28390, AT5G41990, AT3G46290, AT5G63610, AT2G16250	534	804	18171	1.52365	0.541056
GOTERM_MF_DIRECT	GO:0043424~protein histidine kinase binding	4	0.522193	0.0357597	AT1G26270, AT3G21510, AT5G35750, AT5G11490	534	25	18171	5.44449	0.818672
GOTERM_MF_DIRECT	GO:0004871~signal transducer activity	10	1.30548	0.0329138	AT5G67385, AT5G64330, AT3G21510, AT1G53090, AT1G64610, AT1G02900, AT4G16250, AT5G06320, AT2G46340, AT3G08510	534	150	18171	2.26854	0.828885
GOTERM_MF_DIRECT	GO:0004712~protein serine/threonine/tyrosine kinase activity	5	0.652742	0.0620596	AT4G38470, AT1G08720, AT3G46920, AT3G27560, AT3G63260	534	51	18171	3.33609	0.914387
GOTERM_MF_DIRECT	GO:0042802~identical protein binding	6	0.78329	0.0601201	AT1G50170, AT5G46180, AT3G50930, AT1G02280, AT5G35750, AT3G47430	534	72	18171	2.83567	0.926945
GOTERM_MF_DIRECT	GO:1990269~RNA polymerase II C-terminal domain phosphoserine binding	2	0.261097	0.085446	AT1G61040, AT5G61150	534	3	18171	22.6854	0.956762
GOTERM_MF_DIRECT	GO:0003729~mRNA binding	16	2.08877	0.0946873	AT5G20250, AT5G51120, AT4G09040, AT3G13060, AT5G55550, AT2G34040, AT1G49600, AT1G20970, AT4G38710, AT4G36960, AT2G17870, AT4G17520, AT3G09650, AT4G29820, AT5G07350, AT3G07030	534	351	18171	1.55114	0.960407
GOTERM_CC_DIRECT	GO:0016021~integral component of membrane	180	23.4987	0.0073308	AT1G67880, AT5G47910, AT1G72150, AT2G38995, AT2G18240, AT5G15860, AT1G33110, AT3G12360, AT1G74530, AT1G50630, AT2G39445, AT4G01140, AT3G48310, AT5G59470, AT5G52440, AT2G33580, AT1G53730, AT1G22015, AT2G43070, AT3G23410, AT4G32920, AT2G32480, AT3G04210, AT5G61670, AT5G12170, AT3G52360, AT3G02690, AT1G01180, AT1G26670, AT1G31300, AT5G67550, AT3G15720, AT1G27200, AT5G55790, AT1G17530, AT1G58200, AT5…	703	5439	25147	1.18382	0.504739
GOTERM_CC_DIRECT	GO:0005886~plasma membrane	128	16.7102	0.00717431	AT3G07020, AT4G30960, AT3G54030, AT1G19835, AT5G47910, AT1G72150, AT3G08760, AT1G33110, AT3G12360, AT5G52440, AT2G33580, AT1G53730, AT3G28850, AT2G30860, AT2G32480, AT5G07070, AT1G26670, AT5G64330, AT1G58200, AT5G06970, AT5G57110, AT1G47330, AT4G00670, AT2G16250, AT1G58340, AT5G01280, AT3G59110, AT1G24510, AT5G47070, AT1G12680, AT2G32410, AT5G24650, AT5G09870, AT1G65800, AT3G19740, AT2G03530, AT3…	703	3702	25147	1.23681	0.747219
GOTERM_CC_DIRECT	GO:0005634~nucleus	292	38.1201	0.0908797	AT5G08139, AT3G58040, AT2G01150, AT5G55910, AT4G16250, AT5G47910, AT5G08430, AT1G72150, AT4G14830, AT3G03750, AT1G51660, AT3G49140, AT1G63720, AT1G20910, AT4G18593, AT5G60470, AT1G04870, AT1G10560, AT5G60200, AT5G10550, AT2G17870, AT3G53930, AT5G03415, AT5G54020, AT2G05330, AT4G29820, AT5G59560, AT5G67450, AT4G32350, AT5G62165, AT3G19840, AT4G05010, AT4G30230, AT2G36420, AT3G18790, AT1G64490, AT1…	703	9796	25147	1.06626	0.867611
GOTERM_CC_DIRECT	GO:0031965~nuclear membrane	4	0.522193	0.0890547	AT1G67230, AT5G17020, AT4G01540, AT5G49960	703	38	25147	3.76537	0.892136
GOTERM_CC_DIRECT	GO:0005622~intracellular	25	3.26371	0.0818201	AT2G42880, AT3G21510, AT5G54840, AT4G16250, AT3G14720, AT1G02280, AT5G47220, AT1G50190, AT4G18330, AT2G42330, AT1G02900, AT3G45640, AT2G43590, AT4G14350, AT1G20910, AT1G73730, AT2G43490, AT5G17020, AT1G28370, AT5G54020, AT3G51110, AT5G06970, AT2G29100, AT5G43700, AT3G08510	703	634	25147	1.41053	0.902623
GOTERM_CC_DIRECT	GO:0015030~Cajal body	3	0.391645	0.0802874	AT2G20490, AT4G03430, AT1G09700	703	17	25147	6.31253	0.930349
GOTERM_CC_DIRECT	GO:0000974~Prp19 complex	3	0.391645	0.0721357	AT1G04510, AT3G51110, AT3G18790	703	16	25147	6.70706	0.942733
GOTERM_CC_DIRECT	GO:0005635~nuclear envelope	6	0.78329	0.0585569	AT1G67230, AT5G36940, AT5G07350, AT3G56900, AT3G57350, AT5G51200	703	75	25147	2.86168	0.943938
GOTERM_CC_DIRECT	GO:0009506~plasmodesma	38	4.96084	0.0567599	AT3G59110, AT5G01280, AT1G24510, AT1G72150, AT3G29310, AT5G05170, AT1G65800, AT5G19780, AT2G36850, AT1G02900, AT3G05220, AT5G06320, AT2G41960, AT2G01970, AT1G11340, AT2G30860, AT3G63260, AT5G20250, AT3G19080, AT1G11260, AT1G61900, AT1G65570, AT2G34040, AT5G52290, AT1G70600, AT4G23250, AT2G39370, AT5G51550, AT1G18650, AT5G51970, AT1G11310, AT5G06970, AT3G46290, AT5G57110, AT1G75370, AT2G19120, AT5…	703	1008	25147	1.34851	0.975774
KEGG_PATHWAY	ath04075:Plant hormone signal transduction	17	2.21932	0.00114342	AT3G21510, AT4G14550, AT3G03850, AT4G34000, AT5G47220, AT2G37030, AT3G63010, AT5G53160, AT2G46370, AT3G15540, AT3G12830, AT2G41370, AT1G77920, AT5G43700, AT1G15580, AT1G73730, AT5G35750	123	265	4727	2.46538	0.0853719
KEGG_PATHWAY	ath03008:Ribosome biogenesis in eukaryotes	8	1.04439	0.0148862	AT5G11240, AT5G37350, AT1G26530, AT2G20490, AT4G07410, AT5G17020, AT5G42540, AT5G66540	123	101	4727	3.04403	0.442854
