# Supplementary material for: Molecular Targets and Biological Functions of cAMP Signaling in Arabidopsis
Source: Biomolecules. 2021 May 3;11(5):688. doi: 10.3390/biom11050688 (PMC8147800; doi:10.3390/biom11050688)
Supplement: Supplementary file 1 [file biomolecules-11-00688-s001.zip › Supplementary Data S7.xlsx]

## Sheet: chocolate1
Supplementary Data S7. List of top-ranking 10% genes with highest KME within the co-expression module of “chocolate1” derived from WGCNA
GeneID	Conn-total	Conn-intramodular	KME	KME-p value	GeneName	LB1-FPKM	LB2-FPKM	LB3-FPKM	LD1-FPKM	LD2-FPKM	LD3-FPKM
AT5G58900	3591.84	1768.46	0.999464	4.32e-07	AT5G58900	10.7044	8.71282	9.6263	3.33714	3.80437	5.29074
AT1G06410	3534.11	1759.12	0.999205	9.48e-07	TPS7	170.314	145.52	155.94	78.7632	85.1166	107.103
AT5G07920	3647.27	1771.38	0.998701	2.53e-06	DGK1	44.6628	41.1155	43.619	21.8166	24.5608	29.5839
AT5G47780	3545.12	1754.21	0.998457	3.57e-06	GAUT4	42.2206	38.7979	40.9294	28.9321	30.368	33.6253
AT4G24220	3593.22	1763.02	0.998407	3.8e-06	VEP1	149.39	140.345	146.597	97.0698	105.105	117.568
AT3G11420	3519.84	1750.34	0.998407	3.81e-06	AT3G11420	77.4281	65.7317	70.4049	36.8494	40.4424	49.3581
AT3G11700	3616.69	1764.3	0.998189	4.92e-06	FLA18	149.641	136.347	147.018	71.8111	82.0602	99.5154
AT1G68460	3593.9	1762.62	0.99812	5.3e-06	IPT1	0.686044	0.599174	0.645556	0.204866	0.220511	0.364307
AT3G58790	3617.5	1766.44	0.998069	5.59e-06	GAUT15	46.3309	42.411	45.1921	21.2292	22.2317	29.0987
AT3G02170	3559.85	1752.92	0.997878	6.75e-06	LNG2	50.5251	44.6949	45.8827	25.3087	28.0978	33.1056
AT1G12450	3574.76	1753.91	0.997429	9.9e-06	AT1G12450	21.493	17.8596	20.2303	6.72498	8.59747	11.363
AT4G24740	3644.34	1761.46	0.997404	1.01e-05	AFC2	27.8051	26.3879	26.595	15.3023	16.8779	19.6689
AT1G51090	3524.68	1748.89	0.997382	1.03e-05	AT1G51090	25.7082	21.6448	21.8669	5.57307	6.86615	11.4703
AT1G51805	3539.45	1750.21	0.997095	1.27e-05	AT1G51805	64.9017	57.3587	61.4338	31.7126	32.0461	41.9443
AT3G15500	3694.57	1763.54	0.996966	1.38e-05	NAC055	32.6469	29.6095	32.6739	14.3429	16.2523	19.6394
AT5G02170	3644.35	1756.62	0.99666	1.67e-05	AVT1E	17.4744	15.8424	17.1209	9.24244	9.51503	11.4836
AT1G16370	3662.3	1758.97	0.996641	1.69e-05	2020-10-06	57.5674	49.9648	55.4004	19.8031	20.9366	28.4121
AT5G01730	3586.08	1744.93	0.996595	1.74e-05	SCAR4	15.4053	12.7635	14.1123	6.68375	7.27852	8.82683
AT2G34770	3694.09	1760.78	0.996559	1.77e-05	FAH1	113.795	103.115	111.288	35.9112	44.4708	57.5524
AT5G13500	3671.2	1757.01	0.996308	2.04e-05	HPAT3	17.8689	17.2888	18.1307	11.1454	11.9296	13.6653
AT2G34390	3444	1729.2	0.995961	2.44e-05	NIP2-1	0.68563	0.624326	0.662816	0.332706	0.381988	0.502787
AT4G19450	3554.88	1736.09	0.995831	2.6e-05	AT4G19450	44.3141	38.3269	40.1601	22.5748	23.4357	27.9302
AT5G40380	3511.23	1735.64	0.995798	2.65e-05	CRK42	11.6324	10.1676	11.0147	4.01522	5.09335	6.92792
AT3G02880	3495.35	1732.66	0.995793	2.65e-05	AT3G02880	158.502	142.834	145.826	92.1148	93.1094	112.19
AT5G19770	3648.6	1748.3	0.99563	2.86e-05	TUBA3	112.161	101.059	108.101	65.9822	71.7145	78.6583
AT2G25800	3587.65	1741.32	0.995615	2.88e-05	AT2G25800	22.2016	20.0312	21.6874	13.3753	13.5126	15.8601
AT1G19450	3438.93	1722.5	0.995555	2.96e-05	AT1G19450	85.9036	75.1007	81.8792	48.7168	49.9685	62.2468
AT1G44350	3546.55	1742.6	0.995456	3.09e-05	ILL6	116.413	103.909	117.019	44.7852	46.0146	68.2888
AT5G16910	3599.78	1743.23	0.995448	3.1e-05	CSLD2	115.27	106.073	110.465	53.597	63.9457	76.0864
AT1G07530	3666.76	1749.67	0.995405	3.16e-05	SCL14	16.6385	16.9893	16.47	20.2537	19.8402	18.7555
AT1G76160	3676.89	1750.03	0.995394	3.18e-05	sks5	244.215	218.672	256.905	85.1069	99.5743	130.12
AT5G65020	3394.95	1718.28	0.995394	3.18e-05	ANN2	40.3003	38.2686	38.9956	30.3047	31.3918	34.91
AT2G39980	3661.76	1747.64	0.995278	3.34e-05	AT2G39980	18.569	17.198	19.37	8.55467	9.62863	11.8812
AT5G44020	3550.17	1735.72	0.995147	3.53e-05	AT5G44020	158.584	138.982	154.608	58.3228	73.4641	94.5704
AT3G51870	3633.14	1742.39	0.995096	3.6e-05	EAAC	27.6113	26.3819	26.7421	20.8055	21.1653	22.6263
AT2G41430	3551.44	1731.59	0.995088	3.61e-05	ERD15	1541.1	1433.11	1443.14	1037.46	1060.89	1176.5
AT4G02670	3487.49	1719.6	0.995053	3.66e-05	AtIDD12	0.0447913	0.107064	0.0621757	0.289804	0.266184	0.190283
AT1G29670	3509.28	1727.34	0.994992	3.76e-05	AT1G29670	144.076	128.597	131.672	79.1256	89.3215	101.053
AT5G03150	3469.6	1716.8	0.994988	3.76e-05	JKD	0.97014	1.36266	1.24949	3.05756	2.77493	2.15628
AT5G19280	3493.68	1731.58	0.994984	3.77e-05	KAPP	11.9047	12.2636	12.0319	16.8499	16.1293	14.0867
AT1G77390	3673.29	1745.95	0.994942	3.83e-05	CYCA1-2	5.7424	5.34142	5.37085	2.93455	3.17712	3.67614
AT5G25350	3688.12	1747.19	0.994891	3.91e-05	EBF2	92.6297	70.9132	94.71	15.2462	18.7069	28.1613
AT4G37310	3605.01	1736.88	0.994859	3.96e-05	CYP81H1	15.9916	17.9416	15.6862	29.4593	27.9241	23.4362
AT2G17480	3380.11	1707.73	0.994796	4.06e-05	MLO8	99.0223	87.0882	93.5263	58.8281	62.0829	74.9506
AT1G68990	3539.31	1729.56	0.994716	4.18e-05	MGP3	4.10958	4.42261	4.07839	5.90139	5.78786	5.10189
AT5G21040	3697.3	1746.68	0.994662	4.27e-05	FBX2	12.3437	11.733	11.788	7.16579	7.71014	8.60831
AT4G33070	3598.81	1734.52	0.99466	4.27e-05	PDC1	9.72847	7.05038	8.93221	1.82806	1.92585	3.25353
AT3G62650	3653.52	1743.17	0.994627	4.32e-05	AT3G62650	85.2275	86.053	86.6907	110.424	106.762	99.197
AT1G30360	3690.4	1745.39	0.994275	4.91e-05	ERD4	234.654	221.913	242.334	105.653	112.086	141.83
AT4G36540	3541.59	1725.38	0.994203	5.03e-05	BEE2	5.7006	6.37091	6.46004	12.3543	10.6804	9.07258
AT5G24030	3401.64	1709.03	0.994164	5.1e-05	SLAH3	147.204	107.041	124.627	29.6828	41.0602	65.6192
AT5G18340	3475.75	1718.11	0.994118	5.18e-05	PUB48	3.12838	2.93334	2.85974	1.76491	1.91297	2.29604
AT2G22482	3393.19	1705.51	0.994052	5.3e-05	AT2G22482	1.47085	1.75789	1.75005	3.26282	3.10225	2.39898
AT1G04430	3638.04	1738.17	0.994017	5.36e-05	AT1G04430	101.115	91.5057	99.5107	45.2401	55.1009	63.9055
AT2G30230	3517.43	1723.06	0.993909	5.55e-05	AT2G30230	24.6635	20.7681	22.1397	9.61424	12.0646	14.4556
AT4G19530	3678.48	1740.98	0.993837	5.69e-05	AT4G19530	22.817	21.4993	24.0241	9.2542	9.93245	13.1523
AT4G14746	3590.96	1737.22	0.993837	5.69e-05	AT4G14746	48.1355	47.1909	48.0534	29.2974	29.9299	36.4868
AT5G20190	3613.3	1729	0.993785	5.78e-05	AT5G20190	257.043	219.801	235.954	121.962	128.285	149.737
AT2G38310	3551.71	1726.25	0.993699	5.94e-05	PYL4	129.334	107.741	121.127	30.3375	43.9115	60.8197
AT1G70290	3391.27	1704	0.993652	6.03e-05	TPS8	110.687	91.902	101.956	45.7037	54.6377	70.9108
AT4G27350	3540.78	1727.28	0.993626	6.08e-05	AT4G27350	84.7687	82.2966	80.5567	41.7217	45.1317	58.6815
AT2G44200	3586.78	1726.17	0.993572	6.18e-05	AT2G44200	30.4243	28.5252	31.2374	20.4665	21.3239	24.0956
AT2G36720	3681.5	1737.56	0.993549	6.23e-05	AT2G36720	7.23328	7.46871	7.36083	9.20994	9.07254	8.60744
AT4G14368	3550.92	1724.36	0.993465	6.39e-05	AT4G14368	2.18837	2.11017	2.1812	0.983485	1.17765	1.53844
AT2G39480	3493.06	1712.47	0.993445	6.43e-05	ABCB6	12.1004	11.1473	11.8224	8.84013	9.36461	10.0196
AT1G29640	3442.57	1708.86	0.99336	6.6e-05	AT1G29640	9.32395	8.09846	7.70357	3.20924	3.5638	5.12398
AT4G18700	3593.72	1728.32	0.993224	6.87e-05	CIPK12	52.2187	47.3848	49.7769	25.482	30.69	34.8461
AT1G75220	3644.61	1732.58	0.993139	7.05e-05	AT1G75220	115.027	107.868	121.468	55.9531	58.4566	74.1089
AT4G03400	3421.82	1700.35	0.993113	7.1e-05	DFL2	46.666	24.9218	35.1837	4.07534	6.65214	11.8926
AT1G12550	3380.83	1700.74	0.993023	7.28e-05	HPR3	9.99578	9.48499	9.66714	7.0647	7.53743	8.50415
AT2G39720	3748.92	1739.85	0.992956	7.43e-05	RHC2A	18.448	17.8989	18.5032	10.8285	11.7233	13.0482
AT4G14310	3460.58	1699.88	0.992956	7.43e-05	AT4G14310	2.11772	2.31429	2.18964	2.82249	2.73145	2.54953
AT1G30640	3747.08	1739.48	0.992938	7.46e-05	AT1G30640	36.4919	34.8287	35.9729	16.0229	18.2042	21.3228
AT4G29900	3573.06	1722.1	0.992923	7.49e-05	ACA10	93.8843	92.071	93.1185	64.2728	69.9436	77.8882
AT1G22360	3721.93	1736.03	0.992867	7.61e-05	UGT85A2	44.2372	42.7303	46.4357	14.8759	18.0786	23.3595
AT4G23440	3412.4	1695.41	0.992782	7.8e-05	AT4G23440	7.19441	5.94499	6.87783	3.51152	3.92468	4.86235
AT5G40890	3461.16	1711.7	0.99276	7.84e-05	CLC-A	77.9494	70.9492	74.0362	49.2898	48.2955	58.3844
AT3G25770	3446.34	1713.04	0.992627	8.13e-05	AOC2	93.2693	83.466	83.4186	22.0912	24.6174	46.1791
AT2G22770	3603.55	1722.58	0.99258	8.24e-05	NAI1	10.4697	9.2478	10.946	3.94113	4.96916	6.19483
AT1G47380	3481.23	1701.52	0.992546	8.31e-05	AT1G47380	30.7159	25.2719	29.6235	15.3241	16.8609	20.0994
AT5G13560	3651.39	1726.74	0.992523	8.37e-05	AT5G13560	33.5817	31.9455	31.9012	21.4128	22.0296	24.4095
AT5G01740	3568.61	1713.24	0.992467	8.49e-05	AT5G01740	8.42543	6.02265	7.49474	2.12188	2.58472	3.36975
AT1G74430	3592.12	1718.74	0.992451	8.53e-05	MYB95	106.551	95.3355	97.8304	56.7443	57.6308	67.2541
AT5G64750	3682.78	1731.13	0.992363	8.73e-05	ABR1	63.9698	51.7376	65.0844	7.81643	8.33543	15.1768
AT3G54020	3403.59	1703.42	0.992186	9.13e-05	IPCS1	155.417	148.791	155.105	110.596	113.78	132.817
AT4G15470	3355.54	1685.38	0.992152	9.22e-05	LFG5	195.487	189.722	190.305	172.276	173.195	181.076
AT1G75310	3641.25	1721.79	0.992121	9.29e-05	AUL1	21.8876	17.8803	22.0854	7.90452	9.306	11.2216
AT2G19780	3698.71	1730.7	0.99203	9.5e-05	AT2G19780	4.5697	3.87672	4.48366	1.21243	1.69729	2.04838
AT5G18130	3433.68	1696.73	0.991984	9.61e-05	AT5G18130	14.8303	16.1142	15.4616	20.3995	20.6063	18.2322
AT5G05440	3572.23	1714.61	0.991873	9.88e-05	PYL5	223.679	201.243	206.873	52.4233	75.9482	106.586
AT1G19210	3574.56	1708.28	0.991833	9.98e-05	ERF017	3.73618	5.35222	4.02291	13.2623	12.0046	9.24059
AT4G21215	3437.51	1698.93	0.9918	0.000100582	AT4G21215	4.24707	4.65134	4.2608	7.1795	6.38441	5.49475
AT5G21940	3438.45	1691.33	0.99179	0.000100833	AT5G21940	145.138	129.471	143.878	95.6857	99.955	114.254
AT1G61470	3571.83	1715.3	0.991773	0.000101243	CAF1-5	5.46578	7.8434	6.18261	24.8894	17.9971	14.6228
AT3G11170	3622.03	1721.09	0.991701	0.000103035	FAD7	190.682	176.908	189.408	114.875	113.675	133.488
AT5G44050	3564.9	1712.71	0.991679	0.000103564	DTX28	36.2918	31.0476	37.6066	4.96957	8.51131	14.0522
AT1G69270	3742.78	1729.76	0.991666	0.000103903	RPK1	8.51204	8.75983	8.35076	12.7435	12.0703	11.1374
AT1G53570	3523.84	1700.24	0.991654	0.000104192	MAPKKK3	43.6557	36.8535	40.3796	23.3302	23.6126	27.7968
AT5G24430	3503.68	1706.52	0.991615	0.000105179	CRK4	65.4243	64.3224	63.5274	44.0319	47.2435	54.0596
AT5G52120	3720.91	1727.58	0.991609	0.000105308	PP2A14	10.722	8.99575	11.1146	2.44493	3.13229	4.07856
AT2G21580	3654.21	1719.39	0.991528	0.00010735	RPS25B	87.9701	91.2314	87.8508	105.603	102.648	99.5475
AT2G18940	3589.16	1721.86	0.991521	0.000107528	AT2G18940	2.52646	2.64452	2.56151	4.11866	4.19514	3.49873
AT5G40030	3617.27	1715.83	0.991501	0.000108032	AT5G40030	0.572583	0.5824	0.621476	1.27693	1.14027	0.931577
AT5G62600	3699.6	1725.22	0.991474	0.000108734	MOS14	9.67154	9.58123	9.9841	6.42384	6.69091	7.54898
AT5G56160	3735.77	1727.88	0.991462	0.000109026	SFH14	12.3339	10.9232	12.8219	3.54804	4.28534	5.40117
AT1G78100	3616.33	1713.74	0.99121	0.000115554	AT1G78100	14.1466	11.9657	13.0214	6.54944	7.43729	8.21795
AT2G35800	3509.04	1702.72	0.991157	0.000116944	AT2G35800	9.22584	9.70685	9.68701	13.2742	12.1172	11.2981
AT4G18880	3641.13	1718.72	0.99114	0.000117414	HSFA4A	22.9619	23.7456	21.843	38.4704	37.5576	31.5068
AT2G37540	3672.22	1719.29	0.991128	0.000117707	AT2G37540	65.5657	66.474	66.778	31.5431	35.4594	44.097
AT4G26690	3502.24	1703	0.991076	0.000119111	GDPDL3	291.146	259.063	272.08	125.104	157.656	187.701
AT3G28200	3684.97	1722.55	0.991031	0.000120308	PER31	109.668	100.551	108.089	46.5921	58.2164	65.6762
AT3G06070	3640.9	1716.24	0.991022	0.000120537	AT3G06070	222.999	191.055	190.566	59.5161	80.6086	96.6122
AT1G16610	3343.04	1677.49	0.99097	0.000121933	SR45	15.1563	15.5911	15.3725	16.9322	16.5471	16.0744
AT3G24050	3706.14	1723.33	0.990934	0.000122911	GATA1	95.2193	91.1456	92.7732	66.7942	71.9278	74.9229
AT5G57940	3635.89	1716.71	0.990915	0.000123431	CNGC5	50.9762	47.2129	48.8857	33.8758	36.912	38.5994
AT1G45688	3680.11	1716.52	0.990829	0.000125779	AT1G45688	99.9597	97.8613	105.33	58.5196	64.7047	73.9118
AT3G58120	3465.5	1696.15	0.99076	0.000127662	BZIP61	18.0315	14.4694	16.3238	6.74991	8.69816	10.3245
AT5G58680	3669.79	1715.38	0.990758	0.000127719	AT5G58680	11.5487	13.5124	11.9559	27.0001	25.6105	21.8508
AT5G44130	3665.77	1718.92	0.990611	0.000131809	FLA13	187.078	153.042	169.733	44.964	64.1657	75.2769
AT3G27170	3601.11	1712.55	0.990566	0.000133068	CLC-B	40.848	34.7468	39.6173	12.8069	12.1303	18.0718
AT4G20350	3676.48	1714.23	0.990414	0.000137406	AT4G20350	1.37231	1.24422	1.33016	0.765426	0.826075	0.90463
AT5G54380	3478.6	1695.62	0.990292	0.000140911	THE1	140.069	116.363	132.834	56.7749	72.3105	85.3715
AT1G10155	3503.2	1690.38	0.990097	0.000146606	ATPP2-A10	18.3749	16.4098	19.0997	10.5271	11.461	13.4828
AT2G23120	3615.73	1710.41	0.990025	0.000148746	AT2G23120	1402.04	1417.41	1356.09	630.96	664.722	882.983
AT1G53840	3377.75	1674.83	0.990004	0.000149374	PME1	237.456	213.611	234.397	160.397	162.348	191.166
AT5G65630	3658.54	1708.14	0.989973	0.000150296	GTE7	51.7683	44.7904	55.1781	20.7581	23.9545	28.6387
AT1G08200	3669.69	1711.46	0.989942	0.000151242	AXS2	163.946	165.601	160.956	99.8573	105.552	122.163
AT1G27910	3693.52	1712.01	0.989919	0.000151924	PUB45	15.5338	12.884	16.1239	4.59088	5.35688	6.6794
AT1G72450	3702.92	1712.42	0.989895	0.000152654	TIFY11B	411.172	403.221	388.457	200.741	219.358	255.19
AT1G09260	3302.2	1662.26	0.989779	0.000156156	AT1G09260	0.052053	0.124422	0.108384	0.353627	0.348006	0.221132
AT4G35750	3569.65	1704.53	0.989775	0.000156277	AT4G35750	58.8638	60.4629	56.3362	88.8005	88.0619	74.4003
AT2G27690	3678.68	1708.62	0.989656	0.000159929	CYP94C1	343.012	320.885	305.463	82.6498	115.25	145.996
AT5G45190	3472.31	1700.39	0.98964	0.000160434	AT5G45190	16.545	16.3996	16.3352	14.0896	14.0577	15.1428
AT1G35670	3639.26	1703.69	0.989572	0.000162538	CPK11	37.1584	36.871	39.6755	21.4384	23.5262	27.7672
AT3G52500	3734.43	1714.22	0.989519	0.000164202	AT3G52500	35.5983	35.5522	36.5389	16.7825	18.011	21.7944
AT5G65280	3488.58	1681.54	0.989504	0.000164668	GCL1	40.6835	29.8099	40.1067	13.1418	13.387	19.5876
AT1G20440	3451.43	1685.04	0.989496	0.000164926	COR47	416.129	360.837	418.335	224.426	220.73	287.732
AT5G59920	3439.34	1683.3	0.989435	0.000166831	ULI3	37.9748	35.5075	33.222	12.3022	15.1685	22.2216
AT2G38760	3481.78	1687.44	0.989414	0.000167502	ANN3	12.8308	12.0381	13.8212	5.83765	6.78165	8.99648
AT4G36010	3261.67	1651.97	0.989377	0.00016867	AT4G36010	102.297	81.5177	88.441	44.665	50.8009	66.0346
AT5G01380	3595.72	1695.81	0.989376	0.000168691	GT-3A	59.7854	41.2282	58.783	13.2236	16.3835	21.3027
AT2G36380	3391.44	1669.76	0.989315	0.000170657	ABCG34	23.7984	19.8086	23.4544	12.1574	13.66	16.5384
AT3G18710	3359.14	1669.45	0.989283	0.000171654	PUB29	4.12609	6.03177	4.16215	19.4905	14.5979	9.06134
AT5G61810	3603.1	1699.77	0.989274	0.000171945	AT5G61810	17.698	14.5159	18.4734	5.4335	5.33609	7.86247
AT3G63250	3522.12	1689.77	0.989242	0.000172983	HMT-2	10.9333	11.0618	11.1372	13.3368	12.6972	12.0822
AT5G41590	3435.55	1683.53	0.989227	0.000173453	AT5G41590	0.499527	0.477606	0.468047	0.0727196	0.139152	0.291788
AT1G63150	3385.36	1668.33	0.989182	0.000174915	AT1G63150	0.651231	0.706472	0.68842	0.85567	0.814957	0.776767
AT1G52720	3342.42	1671.36	0.989172	0.000175237	AT1G52720	95.7884	82.8621	86.4542	51.7029	50.2804	66.2582
AT2G01850	3454.7	1682.89	0.989121	0.000176894	XTH27	212.297	208.157	207.531	149.783	162.141	181.292
AT3G56090	3317.35	1667.62	0.98906	0.000178864	FER3	49.7344	42.7847	42.3859	22.6631	22.7026	31.7723
AT5G40540	3673.43	1706.42	0.989047	0.00017931	AT5G40540	14.5463	14.8494	14.3758	7.24222	7.71883	9.60049
AT5G53500	3506.82	1689.71	0.989044	0.000179388	AT5G53500	15.4075	12.662	15.1221	6.11217	7.81678	9.15692
AT1G22830	3471.72	1694.16	0.989028	0.000179922	PCMP-E24	10.074	9.40885	9.13706	4.50643	4.33734	6.20112
AT1G75380	3650.98	1701.24	0.989027	0.00017996	BBD1	58.9205	64.3048	61.7885	93.4479	89.2737	83.8134
AT1G63200	3668.23	1706.56	0.989007	0.000180594	AT1G63200	0.240771	0.215817	0.250664	0	0	0.0639277
AT1G47920	3295.07	1658.19	0.988976	0.000181636	AT1G47920	0.095351	0.068375	0.0794151	0	0	0.0405071
AT3G23030	3416.64	1673.45	0.988969	0.000181863	IAA2	298.569	233.898	269.452	128.31	153.555	178.529
AT2G14960	3597.2	1697.57	0.988935	0.000182979	GH3.1	0.736178	0.78208	0.766427	1.06178	1.07095	0.977324
AT1G06640	3452.39	1681.6	0.988915	0.000183623	AT1G06640	136.075	129.749	135.654	64.1981	76.9249	98.2328
AT1G08757	3269.31	1658.77	0.988873	0.000185027	AT1G08757	0.0584268	0.209486	0.212896	1.21914	1.0742	0.527445
AT5G28237	3439.25	1693.38	0.988828	0.00018652	AT5G28237	21.9433	19.4799	20.3408	6.79842	6.2655	11.406
AT4G27720	3395	1660.66	0.988807	0.000187229	AT4G27720	81.2331	68.7521	75.6118	49.168	52.4338	58.7131
AT5G38880	3506.32	1685.36	0.988797	0.000187543	2020-08-05	13.6808	13.4803	14.0058	10.7129	11.2844	12.2348
AT2G40140	3661.75	1700.27	0.988712	0.0001904	CZF1	63.7164	77.873	69.7809	204.402	190.559	156.959
AT4G12420	3457.29	1675.77	0.988637	0.000192947	SKU5	86.8201	73.056	87.6362	43.2657	49.915	58.6925
AT1G14330	3695.71	1704.25	0.988618	0.000193594	AT1G14330	46.2315	43.0299	49.3317	15.2965	20.3915	24.389
AT1G23340	3499.11	1684.79	0.988605	0.000194013	AT1G23340	1.1093	1.31435	1.14493	2.14391	2.2377	1.77736
AT1G70790	3666.01	1704.16	0.98847	0.000198647	CAR9	17.9361	18.0162	18.4482	11.5384	11.6954	13.6359
AT5G51350	3406.44	1672.1	0.988454	0.000199191	AT5G51350	1.38458	1.51688	1.3664	2.02263	2.01689	1.71558
AT4G12000	3547.56	1692.78	0.988447	0.000199435	AT4G12000	19.9528	20.1451	18.899	9.49436	10.0963	13.4235
AT5G20220	3560.85	1697.55	0.98836	0.000202463	AT5G20220	9.24692	9.19143	9.07329	7.17437	7.13879	7.89238
AT5G64660	3554.64	1682.1	0.988335	0.000203299	PUB27	32.8285	38.2519	33.5244	56.2125	52.5476	47.8199
AT1G69570	3605.9	1695.32	0.988309	0.000204208	CDF5	59.6935	53.0135	59.1286	14.5727	22.3569	28.3618
AT5G64740	3290.61	1645.41	0.988303	0.000204447	CESA6	112.644	96.4281	106.465	69.0015	71.7533	86.0278
AT5G65470	3715.31	1703.86	0.988285	0.000205055	OFUT39	268.315	257.982	267.484	102.776	132.633	152.449
AT2G44230	3512.81	1691.46	0.988204	0.000207898	AT2G44230	50.9688	51.0816	47.5462	17.7497	18.4888	29.0909
AT5G49470	3601.74	1689.17	0.988071	0.000212603	AT5G49470	2.43665	2.4585	2.61963	4.10573	3.86115	3.38111
AT5G53750	3629.58	1691.16	0.988021	0.00021438	AT5G53750	55.9102	56.0438	50.0868	18.8493	22.4142	29.5508
AT4G18070	3727.81	1705.19	0.988015	0.000214605	AT4G18070	115.24	107.324	111.382	61.9015	70.3268	74.4502
AT3G16170	3305.35	1662.66	0.988014	0.000214645	AAE13	9.99343	9.74988	9.71398	8.02621	8.21517	9.054
AT2G38240	3515.09	1685.73	0.988007	0.00021488	ANS	79.7907	53.2857	76.1658	9.94966	8.19895	19.3052
AT1G50460	3622.09	1692.37	0.988001	0.000215105	HKL1	47.7982	40.1028	50.0769	18.5521	22.6672	26.2319
AT5G53730	3569.17	1685.84	0.98786	0.00022018	NHL26	1.32581	1.50531	1.12148	3.50629	3.36087	2.44653
AT3G58620	3467.71	1669.84	0.987858	0.000220254	TTL4	19.8295	15.0822	21.6406	5.84822	6.39818	9.90552
AT2G45180	3433.79	1673.06	0.987796	0.000222493	AT2G45180	271.251	227.166	244.565	129.701	157.016	174.76
AT1G48745	3452.05	1666.09	0.987756	0.000223953	AT1G48745	21.7453	17.3464	17.4412	8.04203	9.37661	10.9597
AT5G19100	3480.98	1673.77	0.987753	0.000224056	AT5G19100	4.05637	2.60536	3.37556	0.575785	0.98392	1.3188
AT3G20620	3525.28	1675.2	0.987735	0.000224717	AT3G20620	5.87886	5.52149	5.44705	4.04654	4.16975	4.47728
AT5G06700	3525.14	1676.32	0.987703	0.000225899	TBR	53.3973	48.7204	56.5131	32.4668	33.9237	39.8211
AT2G29550	3530.67	1676.86	0.987555	0.000231371	TUBB7	73.6286	67.2864	72.5442	51.396	50.5069	56.6188
AT5G38710	3752.53	1701.45	0.987539	0.000231951	POX2	57.2749	53.3418	58.3016	19.6901	22.2239	26.4427
AT5G57180	3653.7	1690.77	0.987535	0.000232101	CIA2	1.68324	2.21373	1.7524	5.2289	4.72426	4.07652
AT4G36040	3356.26	1649.43	0.987523	0.000232545	ATJ11	278.785	230.01	273.646	149.28	159.411	196.516
AT5G10300	3395.53	1657.06	0.987509	0.000233046	HNL	41.4209	33.7584	34.5888	18.7654	21.4674	24.4724
AT4G30210	3553.53	1679.39	0.987407	0.000236858	ATR2	343.709	327.46	350.233	269.156	269.158	292.251
AT3G18040	3712.95	1695.51	0.987391	0.000237472	MPK9	19.7844	18.4661	21.1061	9.7365	10.6982	12.2195
AT5G04430	3615.86	1687.22	0.987378	0.000237973	BTR1	81.5513	81.1384	81.6902	70.6493	73.65	75.8074
AT2G01450	3604.75	1686	0.9873	0.000240894	MPK17	287.938	294.399	291.052	188.186	201.825	233.335
AT1G15010	3454.62	1683.04	0.987297	0.000241028	AT1G15010	537.519	530.489	548.206	278.05	280.264	391.261
AT4G13350	3688.45	1695.47	0.987109	0.000248196	NIG	52.0839	52.7092	53.6265	29.7388	30.3467	36.2106
AT5G55050	3670.08	1692.78	0.987072	0.000249607	AT5G55050	21.2742	20.5368	20.3645	8.98253	9.08947	11.4189
AT1G56140	3462.46	1664.54	0.987038	0.000250943	AT1G56140	49.6373	47.483	44.7983	29.8694	32.5627	36.9141
AT2G03240	3586.72	1681.05	0.986987	0.000252909	PHO1-H5	127.414	115.083	132.226	72.7977	72.2477	86.1788
AT4G36030	3335.55	1661.79	0.986903	0.000256191	ARO3	14.806	8.79159	15.3264	0	0	3.21869
AT1G20330	3421.12	1666.2	0.986896	0.000256451	SMT2	133.497	124.101	130.899	98.1941	106.842	112.663
AT1G27950	3431.71	1671.78	0.986895	0.000256491	LTPG1	220.637	210.899	198.258	118.745	118.428	152.189
AT4G26488	3503.38	1680.29	0.986853	0.000258133	AT4G26488	7.73358	7.25201	6.92106	3.26203	3.09891	4.39105
AT4G08480	3374.04	1666.6	0.986848	0.000258323	MEKK2	6.42749	6.60634	6.32727	8.15788	8.10097	7.17524
AT3G56200	3744.03	1693.27	0.986763	0.000261658	AVT6C	65.1539	65.3564	64.75	31.1055	36.9642	41.6051
AT4G34640	3529.9	1677.87	0.986689	0.000264585	SQS1	28.9086	28.0472	28.1676	23.8297	25.1764	25.7607
AT3G13990	3411.38	1665.21	0.98661	0.000267747	AT3G13990	16.9597	16.2807	17.0031	14.0519	13.8791	15.1969
AT4G37480	3668.01	1686.28	0.986596	0.000268289	AT4G37480	3.99815	4.3037	4.07973	6.03881	5.90068	5.5398
AT4G20260	3756.64	1693.74	0.986584	0.000268767	PCAP1	147.254	146.435	145.638	87.406	98.0389	105.41
AT4G03110	3259.03	1644.95	0.986562	0.000269648	BRN1	67.6475	62.6873	66.4368	41.7368	44.948	55.5957
AT4G12410	3628.35	1684.02	0.986523	0.000271232	AT4G12410	5.06232	3.96494	4.45163	1.35944	1.75248	1.98354
AT1G05870	3359.78	1655.63	0.986518	0.000271438	AT1G05870	5.52179	5.73061	5.40349	7.99514	7.44583	6.43326
AT5G66920	3471.53	1669.13	0.986508	0.000271821	sks17	41.4665	35.6971	38.4668	23.3038	26.8489	28.6674
AT5G16370	3520.22	1679.46	0.986482	0.000272876	AAE5	69.9886	65.7485	72.5981	42.5101	40.9991	51.1586
AT4G35480	3767.86	1695.24	0.986453	0.000274037	ATL45	96.8009	94.9301	98.5373	64.7201	70.3731	73.9566
AT4G33950	3321.7	1649.39	0.986437	0.000274679	SRK2E	12.9195	12.2384	13.1472	9.51981	9.87846	11.2962
AT3G05370	3414.05	1654.34	0.986374	0.000277239	AtRLP31	2.42284	2.7832	2.29383	4.32992	4.14128	3.34764
AT3G07040	3621.33	1677.63	0.986328	0.000279091	RPM1	15.4586	14.7329	16.8283	8.96085	9.57103	11.1337
AT2G40130	3699.98	1685.13	0.98631	0.000279835	SMXL8	0.751965	0.789519	0.578001	2.85096	2.29441	1.79877
AT1G04000	3609.34	1681.29	0.98629	0.000280639	AT1G04000	13.7564	12.4009	12.7785	8.05259	8.94323	9.33047
AT2G35760	3552.84	1670.53	0.986137	0.000286952	AT2G35760	45.7509	44.7414	43.5344	30.8742	34.2272	36.881
AT4G24200	3615.28	1684.9	0.986108	0.000288124	AT4G24200	8.83978	8.90736	9.05327	6.83937	6.85658	7.60448
AT5G14120	3347.02	1662.87	0.986046	0.000290729	AT5G14120	146.268	137.271	142.3	101.731	98.6175	119.815
AT4G36730	3618.68	1675.53	0.986038	0.000291051	GBF1	209.597	212.966	201.901	101.487	120.078	143.54
AT1G11960	3623.92	1682.27	0.986021	0.000291748	AT1G11960	81.3444	83.0581	79.5722	50.1825	51.4827	60.6757
AT1G14690	3735.06	1686.23	0.985997	0.000292735	MAP65-7	15.0201	14.8877	14.9884	21.7338	19.9449	18.6839
AT5G65290	3762.48	1691.93	0.985947	0.000294847	AT5G65290	10.4036	10.0852	10.5823	6.67138	7.29891	7.66893
AT2G42010	3672.59	1682.61	0.985944	0.000294953	PLDBETA1	49.2279	46.415	45.7415	27.8653	30.996	32.8008
AT5G60300	3774.72	1689.93	0.985929	0.000295579	LECRK19	17.2143	17.304	17.6295	10.0485	11.1071	12.1436
AT1G51700	3684.92	1684.15	0.985812	0.000300524	DOF1.7	40.9339	40.0345	41.4493	71.1328	68.6346	58.6926
AT2G47440	3626.61	1679.7	0.985806	0.000300789	AT2G47440	95.5083	85.8309	84.5502	24.8269	36.8592	43.3746
AT3G10985	3329	1653.75	0.985753	0.000303014	SAG20	342.772	321.896	319.505	236.857	231.027	274.392
AT5G11070	3358.5	1649.45	0.985743	0.000303445	AT5G11070	362.256	342.102	364.511	239.751	267.829	303.258
AT1G54740	3443.99	1652.68	0.985688	0.000305781	AT1G54740	37.9653	30.6539	41.2872	14.2347	17.0346	22.3674
AT5G21990	3579.89	1679.31	0.985682	0.000306046	OEP61	36.6962	35.1223	37.5575	23.6999	22.9003	27.1029
AT3G23750	3242.07	1621.95	0.985627	0.000308371	TMK4	84.3281	66.6107	77.598	40.2562	45.0942	57.2193
AT3G46630	3460.37	1660.58	0.985537	0.000312266	AT3G46630	14.2396	14.2558	13.7776	10.2235	10.7548	12.1623
AT2G32030	3561.87	1671.2	0.985492	0.000314212	AT2G32030	26.2839	29.5444	28.2217	42.9385	38.9634	37.519
AT3G49160	3412.44	1650.68	0.985473	0.000315004	PKP4	14.1803	13.1061	11.5688	5.54656	5.99467	8.10513
AT3G25760	3490.61	1668.76	0.985394	0.000318462	AOC1	105.978	106.641	90.1121	24.6915	25.6919	46.8313
AT1G59620	3366.89	1631.85	0.985327	0.000321361	CW9	9.87852	11.3079	10.7501	14.6862	14.0992	13.0761
AT1G61100	3656.03	1680.09	0.985212	0.000326403	AT1G61100	111.577	102.353	103.879	41.0444	55.1917	60.8237
AT4G39050	3332.69	1632.65	0.985189	0.000327415	KIN7D	25.2001	24.0506	23.6911	19.9417	20.7038	21.7663
AT3G51660	3271.88	1627.7	0.985154	0.000328969	AT3G51660	23.91	21.4905	20.8748	14.4387	14.6143	17.4637
AT3G47960	3187.6	1616.59	0.985052	0.000333505	NPF2.10	470.44	396.351	419.128	239.631	273.274	339.655
AT4G22150	3470.53	1658.03	0.984893	0.000340593	PUX3	15.7057	15.7872	16.6759	22.8336	22.229	19.4419
AT5G56170	3605.93	1668.15	0.984829	0.000343484	LLG1	179.858	177.487	181.332	96.9637	117.153	132.036
AT2G46520	3543.52	1674.7	0.984753	0.000346952	CAS	29.7672	28.8425	30.1779	17.1271	16.1726	20.6702
AT2G22470	3618.15	1674.99	0.984736	0.000347714	AGP2	381.12	326.348	389.487	115.23	166.325	189.191
AT4G02600	3659.39	1670.53	0.984699	0.000349396	MLO1	53.4444	53.2914	51.9041	35.9021	39.8643	42.5679
AT3G14810	3494.59	1645.58	0.984472	0.000359807	MSL5	17.7054	13.927	17.8594	7.86855	8.60124	10.3058
AT3G02070	3453.49	1646.14	0.984437	0.000361437	AT3G02070	35.5849	32.1005	36.1819	23.8733	25.9464	28.1903
AT3G09450	3441.6	1653.65	0.984424	0.000362019	AT3G09450	1.89645	1.89605	1.66113	0.530923	0.619724	1.08453
AT3G23000	3358.62	1653.55	0.984371	0.000364484	CIPK7	49.4816	50.1889	50.3541	84.517	82.8954	62.5947
AT5G18640	3426.65	1657.74	0.984338	0.000366044	AT5G18640	8.13431	8.64904	8.07823	11.4448	11.8994	10.0387
AT1G80390	3400.63	1653.53	0.984298	0.000367916	IAA15	0.131176	0.125419	0.109253	0	0	0.0557262
AT5G09670	3654.39	1669.93	0.984276	0.000368919	AT5G09670	16.209	15.0319	15.7621	8.98389	9.01367	10.1292
AT1G17455	3344.89	1639.36	0.984165	0.000374114	EFL4	2.68686	2.84863	2.52656	4.39512	4.17695	3.33685
AT2G31010	3726.11	1672.98	0.984108	0.000376844	AT2G31010	10.7878	10.5005	12.6712	2.64442	3.12132	4.28909
AT1G68580	3158.18	1605.65	0.984057	0.000379253	AT1G68580	34.9577	29.7547	32.0853	19.3812	20.8551	26.5521
AT1G14530	3264.64	1626.02	0.983991	0.000382357	THH1	11.8623	10.8783	11.2704	7.42239	8.4618	9.60968
AT1G74950	3571.05	1657.85	0.983973	0.000383241	TIFY10B	192.521	189.559	173.327	99.5489	103.808	123.197
AT3G61960	3475.68	1653.63	0.983935	0.000385064	ATG1A	7.06541	7.77546	7.08914	10.6308	9.48959	8.97438
AT2G25200	3655.32	1663.46	0.983793	0.000391859	AT2G25200	26.5173	29.0258	25.9811	7.76535	9.69445	13.7102
AT3G51550	3370.85	1640.07	0.983757	0.000393622	FER	213.006	196.182	203.226	126.869	149.308	165.736
AT1G72510	3730.57	1676.03	0.983704	0.000396174	AT1G72510	75.7131	65.9174	72.9413	23.9199	30.1255	32.3529
AT2G41475	3543.69	1662.91	0.983664	0.000398117	ATS3A	92.9133	83.4132	87.7753	55.9589	64.4168	66.599
AT3G01520	3480.76	1643.7	0.983606	0.000400958	AT3G01520	119.46	115.96	114.216	97.5295	101.758	104.496
AT5G41790	3388.03	1638.77	0.983548	0.000403775	CIP1	52.3597	47.5135	50.1654	36.3575	34.6956	40.6232
AT2G18570	3700.45	1670.36	0.983535	0.00040439	UGT72D1	4.73465	4.72466	4.57027	8.95587	8.86108	7.53047
AT2G29440	3578.1	1651.12	0.98345	0.000408594	GSTU6	38.1092	27.4755	41.4817	9.15465	9.72572	13.6312
AT2G17520	3276.92	1624.67	0.983413	0.000410403	IRE1A	40.5359	37.6856	40.3459	30.5133	30.3535	35.1137
AT2G39130	3745.67	1669.61	0.983277	0.000417156	AVT1C	12.9645	12.9426	13.8262	5.76143	6.2094	7.32176
AT2G38750	3308.94	1619.9	0.983276	0.000417181	ANN4	37.2098	31.2065	29.8289	16.4001	16.1272	21.1766
AT1G72180	3636.86	1658.3	0.983259	0.000418051	CEPR2	42.0903	36.0196	43.123	19.5059	20.3567	23.2684
AT3G44100	3338.54	1614.05	0.983213	0.000420318	AT3G44100	71.1957	65.9658	68.8447	57.3851	56.8226	61.3623
AT2G19880	3546.63	1647.31	0.983122	0.000424894	AT2G19880	17.1657	17.1656	18.4096	11.3924	12.451	14.1452
AT1G33260	3668.28	1660.92	0.983104	0.00042578	AT1G33260	5.02815	5.12781	4.90198	3.37655	3.52053	3.90393
AT1G49530	3635.71	1668.18	0.98309	0.000426507	GGPP6	9.60813	8.33557	9.43564	3.7546	5.01909	5.324
AT3G61260	3476.26	1647.25	0.983043	0.00042889	AT3G61260	212.792	202.622	208.654	133.211	155.83	169.067
AT4G23590	3503.65	1647.3	0.983024	0.000429835	AT4G23590	0.175841	0.140104	0.167811	0.0568854	0.0816393	0.0933762
AT2G25430	3740.86	1671.44	0.982971	0.000432508	AT2G25430	98.0102	92.5063	100.432	52.2293	60.785	63.6107
AT4G19510	3348.64	1621.81	0.982959	0.000433116	AT4G19510	18.1861	16.508	18.1503	13.171	14.0717	15.1973
AT4G22570	3293.73	1607.91	0.982931	0.00043453	APT3	166.579	180.742	177.772	215.84	217.725	200.263
AT1G48490	3185.29	1603.63	0.982894	0.000436407	AT1G48490	10.6828	11.0328	11.1534	12.7319	12.4464	11.6799
AT1G72470	3738.55	1666.48	0.982893	0.000436495	ATEXO70D1	12.4377	11.9479	11.7189	4.73742	5.54792	6.15889
AT1G76090	3703.53	1669.02	0.982836	0.000439366	SMT3	42.6688	38.7237	43.0511	12.3171	18.0282	19.772
AT3G49940	3592.84	1651.44	0.982833	0.00043955	LBD38	23.0326	18.9076	21.2473	8.75571	8.75645	10.4464
AT1G01120	3213.53	1595.53	0.982757	0.000443428	KCS1	252.584	205.042	220.956	137.116	151.381	175.155
AT1G35350	3607.04	1653.88	0.982695	0.00044659	PHO1-H8	66.8824	65.6571	66.0828	26.2839	35.5266	41.5537
AT2G03980	3521.78	1647.5	0.982691	0.000446808	AT2G03980	23.9552	24.9937	25.1396	13.8088	14.9846	18.811
AT3G16350	3559.3	1648.07	0.98269	0.000446852	AT3G16350	14.8376	14.6545	14.343	6.18763	8.16914	9.75456
AT1G14780	3680.18	1660.4	0.982658	0.000448534	AT1G14780	17.5971	14.6319	17.6975	5.57103	6.13823	7.14161
AT3G14230	3418.94	1641.47	0.982593	0.000451869	RAP2-2	131.169	113.585	120.758	63.3109	79.8628	87.4726
AT1G76680	3728.65	1659.71	0.982507	0.000456315	OPR1	139.173	143.358	137.905	75.5078	87.1385	96.6888
AT1G14280	3639.48	1656.61	0.982496	0.000456899	PKS2	60.4739	56.7507	53.7094	18.2437	25.9736	29.508
AT1G01070	3220.39	1591.4	0.982493	0.000457071	AT1G01070	2.4642	3.09458	3.02124	4.85592	4.68316	3.90574
AT1G22882	3579.37	1654.29	0.982491	0.000457142	SUN3	35.0857	32.7498	34.0282	14.256	19.3883	21.7403
AT5G61590	3264.12	1612.07	0.982484	0.000457554	ERF107	58.79	47.2704	47.8406	22.812	28.995	34.7631
AT5G04480	3243.44	1624.52	0.982425	0.000460585	AT5G04480	31.5032	28.4982	30.5826	18.8443	18.4281	24.7233
AT5G43380	3445.91	1630	0.982267	0.000468917	TOPP7	9.42945	7.45919	9.0428	4.4609	5.17187	5.76705
AT2G26980	3468.66	1634.28	0.982214	0.000471678	CIPK3	8.95104	9.37331	9.85873	13.7684	13.718	12.2754
AT1G49320	3419.47	1651.68	0.982178	0.000473623	USPL1	1.97885	2.10223	1.90755	6.13492	6.83948	3.81408
AT1G74380	3541.61	1641.32	0.982145	0.000475345	XXT5	139.943	143.704	141.765	88.2091	98.6721	114.106
AT5G66200	3736.91	1658.8	0.982085	0.000478548	ARO2	40.0788	39.8755	42.4461	25.7409	28.3748	30.2895
AT5G62350	3471.77	1625.03	0.982061	0.000479831	AT5G62350	159.636	112.042	143.202	56.3445	61.1953	72.7173
AT4G31000	3708.55	1660.66	0.982061	0.000479845	CBP60F	37.1506	36.1959	35.8851	18.2285	22.4631	23.8846

## Sheet: darkorange2
Supplementary Data S7. List of top-ranking 10% genes with highest KME within the co-expression module of “darkorange2” derived from WGCNA
GeneID	Conn-total	Conn-intramodular	KME	KME-p value	GeneName	LB1-FPKM	LB2-FPKM	LB3-FPKM	LD1-FPKM	LD2-FPKM	LD3-FPKM
AT2G21050	3092.87	1505.62	0.998544	3.18e-06	LAX2	11.5733	9.77392	11.0607	16.5588	13.2891	16.5955
AT1G02270	3328.31	1519.3	0.99836	4.03e-06	AT1G02270	53.3366	65.4671	56.8326	28.32	39.7326	30.1395
AT5G51130	3261.68	1511.84	0.997317	1.08e-05	AT5G51130	4.00603	4.55232	4.29028	2.89999	3.43931	2.91197
AT5G07940	3134.56	1497.87	0.996372	1.97e-05	AT5G07940	5.514	4.95537	5.14949	7.15469	6.05781	7.12605
AT3G28460	3366.13	1505.81	0.995378	3.2e-05	AT3G28460	4.93708	4.63839	4.83759	5.94454	5.47182	5.88835
AT5G13300	3287.21	1496.74	0.995264	3.36e-05	AGD3	12.9159	12.378	12.7473	14.8556	13.9427	14.8729
AT1G72040	3121.92	1491.66	0.995196	3.46e-05	AT1G72040	12.8785	12.0319	12.5351	14.5887	13.3099	14.3085
AT4G13710	3302.37	1498.29	0.994702	4.2e-05	AT4G13710	1.88246	1.4597	1.64484	3.62129	2.40971	3.20122
AT3G02460	3348.54	1508.57	0.994546	4.45e-05	AT3G02460	22.4166	27.1189	24.2774	15.1336	18.2331	15.6775
AT1G45145	3121.88	1487.82	0.994135	5.15e-05	TRX5	313.121	424.278	362.86	202.83	271.884	210.407
AT2G28520	2988.72	1469.68	0.99407	5.26e-05	VHA-A1	9.02639	8.51315	8.84275	10.0491	9.4485	10.2125
AT5G45550	3358.94	1490.09	0.993417	6.49e-05	MOB1A	45.4891	48.3451	45.9478	37.6355	41.9837	39.2519
AT5G14880	3446.31	1492.77	0.993139	7.05e-05	POT8	10.8737	9.68957	10.4573	17.1835	13.8217	16.1796
AT2G39700	2984.36	1465.24	0.992878	7.59e-05	EXPA4	24.7356	21.1683	22.4455	34.0532	27.2388	34.8489
AT4G16650	3144.36	1481.32	0.992736	7.9e-05	OFUT29	7.57211	7.251	7.33823	8.54642	7.84363	8.41926
AT5G45920	2907.98	1451.6	0.991755	0.000101681	AT5G45920	2.10786	1.6168	1.94882	3.34335	2.38378	3.42481
AT4G15233	3218.25	1467.12	0.990738	0.000128272	ABCG42	2.36297	2.92623	2.70029	1.14872	1.61407	1.06193
AT5G23510	3169.02	1449.73	0.990262	0.000141769	AT5G23510	26.1088	28.5573	25.3598	15.4198	20.758	16.1177
AT1G05083	2939.05	1446.86	0.989953	0.000150911	AT1G05083	0.459379	0.352944	0.444093	0.66875	0.511871	0.662128
AT5G11970	3314.47	1467.81	0.98961	0.000161361	AT5G11970	87.0842	100.909	93.985	55.8204	75.097	63.154
AT2G29700	3130.62	1457.39	0.989597	0.000161786	PH1	38.5661	40.597	40.3073	33.8215	36.3415	33.4747
AT5G23850	3397.91	1486.26	0.989468	0.000165802	AT5G23850	21.5654	28.718	24.5408	12.5206	16.2564	13.8031
AT1G80280	3101.5	1463.17	0.98938	0.000168568	AT1G80280	5.90634	4.48941	5.2706	8.18096	6.56317	7.87552
AT5G03280	3381.02	1466.42	0.988776	0.000188253	EIN2	11.2274	10.0553	10.6712	15.3089	12.6208	13.9749
AT5G43630	3304.65	1481.2	0.988705	0.000190633	TZP	5.33427	4.60521	5.12364	6.74789	6.01684	6.50045
AT1G27320	3101.04	1453.89	0.988612	0.000193792	AHK3	27.0546	24.146	24.3463	34.5856	29.4336	34.4144
AT2G46080	3354.8	1466.14	0.988569	0.000195263	AT2G46080	32.9592	37.5293	32.6435	21.1203	25.108	21.7201
AT1G77300	2904.5	1435.29	0.98801	0.000214789	EFS	8.01211	7.53063	7.81171	9.58237	8.36081	9.60619
AT5G56590	3413.23	1464.03	0.987796	0.000222489	AT5G56590	4.57172	4.12796	4.25917	6.56316	5.67951	6.49366
AT5G08160	2913.62	1431.73	0.987757	0.000223922	ATPK3	27.8696	32.6782	29.6358	23.0492	26.4788	22.6891
AT3G02015	3352.34	1447.65	0.987238	0.000243254	AT3G02015	0.271581	0.324579	0.28274	0	0.100871	0
AT2G28570	2979.18	1437.44	0.987142	0.000246926	AT2G28570	33.5523	37.3707	35.237	21.3283	29.6773	21.7552
AT5G15920	3009.43	1437.74	0.986971	0.000253524	SMC5	2.9323	2.45863	2.82842	3.85361	3.11456	3.68301
AT3G15095	3293.19	1472.22	0.986967	0.000253693	AT3G15095	16.7331	12.5797	15.1437	25.895	21.4865	24.8879
AT1G10830	3126.03	1453.7	0.986637	0.000266649	Z-ISO	5.78331	5.4141	5.74563	6.42736	6.02139	6.31314
AT1G42550	3192.02	1448.72	0.986423	0.000275265	PMI1	31.6447	26.7499	26.7668	46.2191	36.6296	44.8137
AT4G34030	3356.01	1443.79	0.986281	0.000281025	MCCB	21.635	21.0589	21.4436	25.1273	23.7217	25.1817
AT3G03520	3135.48	1440.52	0.986209	0.000283956	NPC3	15.4374	18.2392	16.8061	9.99574	14.0441	11.2882
AT5G11670	3349.75	1441.98	0.986049	0.000290571	NADP-ME2	130.005	141.644	134.72	79.8618	107.408	89.5729
AT1G04780	3170.27	1434.41	0.986028	0.000291464	AT1G04780	22.7511	22.2723	22.3734	25.8072	24.2367	26.0251
AT1G63680	3339.9	1444.34	0.985894	0.000297077	ATMURE	6.54275	6.0564	6.11276	10.4876	8.44928	10.3879
AT1G19660	3037.39	1426.19	0.985846	0.000299072	BBD2	89.5109	84.8084	85.8758	112.652	99.4084	116.264
AT4G31580	3063.51	1428.57	0.985838	0.000299411	RSZ22	39.2412	42.206	41.3136	34.0036	36.2829	33.0406
AT5G13530	3062.56	1432.47	0.985712	0.000304768	KEG	8.69417	8.01119	8.80233	10.504	9.32616	10.1941
AT1G22410	2989.97	1426.48	0.985704	0.000305084	AT1G22410	128.951	148.623	146.93	96.6178	116.687	93.8149
AT3G04220	3172.37	1445.33	0.985594	0.000309787	AT3G04220	9.36983	11.4507	11.6508	5.0783	7.63187	5.43114
AT1G23890	3061.71	1432.54	0.985589	0.000310024	AT1G23890	4.3066	3.86027	3.85518	6.33275	5.05319	6.53158
AT3G63110	2799.49	1406.65	0.985309	0.000322152	IPT3	7.23117	8.87233	7.74298	4.62971	6.57159	4.36556
AT1G47655	3062.74	1441.45	0.985304	0.000322393	DOF1.6	3.03167	1.89656	2.53978	4.80418	3.61561	4.67876
AT1G27850	3084.09	1412.72	0.985124	0.000330305	AT1G27850	7.53248	7.11271	7.83119	10.1782	8.59538	9.87736
AT1G80260	3230.94	1419.59	0.984838	0.000343102	emb1427	8.38115	8.29608	8.42079	9.42688	8.88622	9.37071
AT3G01300	2784.22	1397.55	0.984728	0.000348048	AT3G01300	6.78458	6.23442	6.70797	8.32384	7.26269	8.65576
AT5G12880	2877.45	1410.02	0.984657	0.000351325	AT5G12880	24.6493	27.6183	26.1255	16.2141	21.3624	15.1983
AT2G20630	3420.3	1454.89	0.984474	0.000359727	PPC3-1.2	100.453	119.956	114.346	69.66	83.0082	74.6019
AT1G58235	2776.86	1396.03	0.984442	0.000361193	AT1G58235	5.44083	4.52085	5.2508	7.3255	6.0433	7.86969
AT3G24520	3235.13	1440.91	0.984373	0.000364399	HSFC1	14.5652	12.5042	12.8414	18.6586	16.1555	17.9931
AT4G37750	3292.73	1459.47	0.984018	0.000381119	ANT	3.70025	2.88469	3.45378	5.29385	4.5496	5.05914
AT3G43300	2989.9	1403.36	0.983852	0.000389044	ATMIN7	22.8532	22.2988	23.2147	25.3051	23.9149	25.1796
AT5G08660	3299.22	1432.17	0.983812	0.000390979	AT5G08660	15.1279	15.9843	15.6854	11.6439	13.8486	12.489
AT1G19330	3548.3	1455.09	0.983748	0.000394031	AT1G19330	10.7809	10.0451	10.5339	13.3493	12.319	12.8746
AT5G20930	3245.2	1419.35	0.983598	0.000401346	TOUSLED	3.85758	3.73171	3.79997	4.90224	4.44295	4.97881
AT2G17350	3176.4	1426.64	0.983307	0.000415637	AT2G17350	13.7586	12.184	13.1158	17.2676	14.5303	15.9914
AT3G56880	3108.55	1443.22	0.983258	0.000418112	AT3G56880	118.884	90.9495	113.795	170.06	141.017	165.117
AT3G03810	2936.95	1413.66	0.983033	0.000429399	EDA30	3.56492	3.23842	3.64048	4.33394	3.89638	4.33275
AT1G13980	3199.68	1427.73	0.983009	0.000430566	GN	8.70892	8.43222	8.35593	10.7691	9.54881	10.7046
AT1G79190	3185.58	1427.76	0.982888	0.000436703	AT1G79190	2.58415	2.19159	2.2777	3.68244	2.82644	3.31698
AT3G03000	3189.81	1432.25	0.98269	0.000446837	CML18	14.5793	19.8678	16.496	9.33055	12.8009	10.7276
AT3G54950	3054.6	1411.77	0.982643	0.000449262	PLP7	8.48166	9.47303	9.38879	6.82461	7.6362	6.59851
AT1G14345	3353.08	1435.37	0.982639	0.000449476	AT1G14345	30.5226	28.1045	27.7634	40.7586	35.3749	39.8585
AT1G65590	2988.42	1407.87	0.982412	0.000461277	HEXO3	21.1687	18.815	20.1381	25.5852	23.8685	26.9594
AT2G30930	3481.67	1433.39	0.982363	0.000463878	AT2G30930	141.7	177.272	170.859	48.8469	87.669	64.1409
AT1G69930	3080.76	1415.27	0.982015	0.000482287	GSTU11	12.9371	19.0879	16.6275	7.42295	11.6685	8.68253
AT5G52870	3300.37	1412.85	0.981899	0.000488511	MAKR5	5.65279	6.12746	5.73299	4.05433	5.04549	4.51431
AT2G38010	3364.13	1423.96	0.981842	0.000491597	AT2G38010	5.42184	5.91252	5.73999	3.89596	4.83496	4.34303
AT2G27660	2937.75	1397.57	0.981547	0.000507654	AT2G27660	42.2325	55.7481	50.5649	31.6518	38.2908	30.6961
AT5G01020	3128.22	1420.08	0.981533	0.00050841	PBL8	38.5283	35.9061	36.1461	46.1029	40.1436	44.0031
AT4G09240	2838.06	1391.17	0.981531	0.000508484	AT4G09240	0.282259	0.433724	0.251877	0	0.179721	0
AT1G55970	2895.03	1391.78	0.981368	0.000517502	HAC04	2.39862	1.91114	2.10206	2.99581	2.47536	2.97741
AT5G66320	3410.57	1417.33	0.981362	0.000517813	GATA5	7.26718	6.95625	7.03282	11.1464	9.31285	10.9212
AT5G12890	3018.23	1407.8	0.981266	0.000523157	UGT92A1	23.8404	28.4181	25.0542	18.4566	22.8055	19.6799
AT4G36945	3599.23	1433.62	0.981193	0.000527203	AT4G36945	25.6394	29.2099	27.6051	14.4109	18.5152	16.3905
AT4G12120	3024.77	1407.34	0.981003	0.000537928	SEC1B	8.13919	10.4514	9.33084	6.21832	7.66668	6.51334
AT3G17900	3057.57	1382.64	0.980944	0.000541241	AT3G17900	9.4742	9.33104	9.658	10.8834	10.0844	10.7764
AT2G26370	3510.7	1433.98	0.980758	0.000551842	AT2G26370	0.619806	0.91713	0.860364	0	0.263097	0.125384
AT2G33360	3118.17	1403.14	0.98072	0.000554018	AT2G33360	3.51143	2.86423	3.51862	5.62302	4.04962	4.92271
AT1G47580	2997.52	1399.61	0.980387	0.000573225	DYW1	4.5136	3.63738	4.5111	6.70844	5.00063	6.1633
AT1G14460	3381.93	1418.6	0.979728	0.000612258	AT1G14460	3.43903	3.03058	3.31975	5.31802	4.72938	5.40352
AT4G21650	3192.4	1415.6	0.979706	0.000613576	SBT3.13	99.362	83.3704	87.9026	123.884	108.925	118.985
AT4G25040	2959.24	1397.82	0.97961	0.000619402	AT4G25040	1.1997	0.39104	1.05029	3.14896	1.51907	2.72203
AT1G32575	3277.88	1413.48	0.97955	0.000623053	AT1G32575	0.755054	0.9024	0.698736	0.325684	0.467407	0.356403
AT1G53300	3352	1411.83	0.979315	0.000637389	TTL1	14.4226	13.6073	13.6045	18.3281	16.7909	18.5018
AT3G52300	3476.22	1410.14	0.979303	0.000638134	ATPQ	123.794	131.444	121.019	87.8216	99.6016	92.0178
AT5G04810	2944.35	1392.73	0.979229	0.000642688	PPR4	18.5374	16.9539	18.0193	26.8559	19.9865	25.2774
AT4G12790	3148.38	1399.39	0.97905	0.000653757	AT4G12790	90.2373	102.781	95.5801	68.9903	85.2952	76.1912
AT3G46530	2983.15	1410.65	0.978776	0.000670876	RPP13	24.9308	22.189	24.5756	28.7143	26.6742	28.7618
AT1G06510	3418.42	1413.49	0.978696	0.000675932	AT1G06510	9.89671	10.385	9.94151	8.0603	8.54078	8.06284
AT3G24420	2862.73	1378.5	0.978649	0.000678919	AT3G24420	80.084	60.7728	70.0469	103.384	88.2495	109.263
AT1G17210	3364.93	1417.14	0.978645	0.000679187	ATILP1	22.7855	19.7375	19.9532	30.7342	26.1842	28.6833
AT2G45980	3099.49	1414.86	0.978631	0.00068009	ATI1	61.6824	66.504	62.2382	55.6009	59.2807	56.7911
AT1G22403	3083.11	1400.36	0.978472	0.000690171	AT1G22403	6.60402	7.67686	7.50231	4.40273	6.12848	4.96723
AT1G80930	2824.06	1382.18	0.97837	0.000696739	AT1G80930	19.6429	18.045	19.7502	22.3845	20.5841	22.5253
AT3G21865	2924.74	1385.66	0.978131	0.000712154	PEX22	49.1397	54.6887	51.8033	44.2403	46.6371	43.2717
AT3G11710	3092.7	1403.48	0.978089	0.00071487	ATKRS-1	42.184	44.4644	42.8991	38.6737	39.5984	38.0289
AT5G59150	2861.4	1371.62	0.978047	0.00071758	RABA2D	17.7073	21.1341	19.4445	15.0704	17.2093	14.9533
AT1G07987	2989.27	1400.77	0.977995	0.000721022	AT1G07987	0.0625773	0	0.0651486	0.182196	0.139456	0.199381
AT5G49980	3483.51	1408.47	0.97797	0.000722641	AFB5	20.6883	18.3896	21.0091	31.831	26.2993	28.4123
AT1G52360	2780.66	1358.37	0.977931	0.000725215	AT1G52360	22.5289	21.8835	22.4134	25.563	23.7273	26.354
AT4G12750	3536.58	1417.74	0.977803	0.000733594	AT4G12750	1.27305	1.01891	1.07947	2.1859	1.70093	1.88429
AT3G11960	3397.44	1400.89	0.977762	0.000736302	AT3G11960	8.3508	8.14579	8.13335	9.97485	9.33662	9.98764
AT2G15760	3492.06	1413.78	0.977592	0.000747568	AT2G15760	4.56424	6.29869	5.4184	1.86428	3.09172	2.63298
AT1G62630	3564.37	1400.86	0.977553	0.000750148	AT1G62630	1.36164	1.27187	1.34189	2.37355	1.93705	2.2043
AT5G44180	3523.57	1409.85	0.977533	0.000751465	RLT2	7.43155	6.77584	6.95461	10.1149	8.58635	9.15361
AT4G03080	3355.61	1406.16	0.977408	0.000759826	BSL1	25.659	28.6499	26.6035	20.4404	23.523	22.3311
AT2G26780	3545.79	1416	0.977254	0.000770212	AT2G26780	8.85215	8.608	8.70344	9.52787	9.19524	9.30751
AT1G69790	3476.86	1406.98	0.977226	0.000772081	PBL18	13.6683	12.7327	12.6252	19.792	17.2062	19.3553
AT3G10190	3248.69	1403.26	0.977038	0.000784858	CML36	4.53319	3.17695	3.50871	7.30183	5.44789	6.3521
AT5G54510	3260.74	1367.78	0.976995	0.000787791	GH3.6	7.7891	7.38593	8.37637	13.1068	10.1092	11.963
AT5G67100	2856.68	1381.4	0.976946	0.000791075	POLA	2.70895	2.60806	2.63884	3.26712	2.83315	3.26822
AT2G30550	3076.3	1391.93	0.976932	0.000792074	AT2G30550	27.3776	35.2718	31.4916	20.8863	25.5569	22.4046
AT5G43990	2685.85	1350.55	0.976929	0.000792233	SUVR2	2.15969	2.01257	2.13051	2.46244	2.21295	2.51826
AT1G18610	2979.94	1390.51	0.976783	0.000802288	AT1G18610	4.23135	3.87351	3.80535	5.31234	4.45404	5.19191
AT3G22220	3315.72	1417.52	0.976403	0.000828668	AT3G22220	6.666	5.89581	6.37948	7.90073	7.24695	7.52603
AT5G39250	3243.1	1387.2	0.976381	0.000830224	AT5G39250	3.00173	3.075	3.14796	1.88879	2.4136	1.91513
AT3G45040	3547.21	1410.82	0.976301	0.000835792	EVN	50.448	56.724	53.1426	31.8472	36.4244	33.0595
AT2G43370	3382.19	1385.08	0.976251	0.000839336	SNRNP35	4.93142	4.42032	4.95327	7.21271	5.82384	6.34392
AT3G61780	3083.67	1392.14	0.976241	0.000840014	emb1703	3.06354	2.23323	2.54299	4.1045	3.4854	4.00017
AT1G48650	3089.4	1394.24	0.976205	0.000842574	AT1G48650	8.45235	7.98983	7.72463	11.225	9.32922	11.0458
AT3G11880	3334.92	1415.03	0.976151	0.000846399	AT3G11880	33.3551	35.9598	33.1643	27.7793	29.4198	28.2757
AT1G14200	3343.39	1392.52	0.976065	0.000852474	AT1G14200	32.3746	38.9754	29.2004	14.2058	19.0204	15.6143
AT3G50140	3414.36	1420.14	0.976044	0.000853979	AT3G50140	0.419328	0.668211	0.509318	0.0872065	0.222497	0.169657
AT5G46580	3115.9	1387.44	0.975812	0.000870533	AT5G46580	11.7117	10.8024	10.7419	13.7486	12.2387	13.2448
AT4G34160	2992.5	1371.78	0.975808	0.000870766	CYCD3-1	6.92965	5.7404	6.00563	8.68243	7.85768	9.08599
AT5G63370	3477.46	1397.03	0.975767	0.00087376	CDKG1	29.4878	33.4073	33.3518	14.1036	18.1836	14.4148
AT2G46680	3047.19	1368.9	0.975734	0.000876127	ATHB-7	14.6214	14.3735	14.7046	20.2072	16.4654	19.6048
AT5G48970	2946.91	1372.73	0.975716	0.000877392	AT5G48970	12.4541	15.1644	14.8551	9.18945	11.9856	9.79197
AT3G61420	3014.81	1384.48	0.975568	0.000888128	TFB1-3	7.01104	6.47067	6.31227	8.6525	7.44108	8.52537
AT1G51690	2994.29	1359.35	0.975344	0.00090439	AT1G51690	13.4719	12.836	13.8579	15.9578	14.3863	15.4662
AT3G27025	2968.61	1358.27	0.975323	0.000905916	AT3G27025	0.556987	0.426036	0.591471	1.16762	0.695109	1.00563
AT5G44090	2659.13	1337.49	0.975266	0.000910121	AT5G44090	16.8773	17.3555	16.843	15.974	16.5874	15.7778
AT3G63080	2934.92	1387.47	0.975211	0.000914118	GPX5	32.0205	39.0116	33.3988	25.8257	28.4007	25.0694
AT4G19003	3041.75	1388.05	0.97516	0.000917844	VPS25	9.79453	13.0262	11.277	7.46598	8.67695	7.55491
AT1G51570	3525.65	1413.24	0.975086	0.000923348	AT1G51570	23.1954	21.1575	22.0941	28.1185	26.0046	26.6926
AT5G45310	3598.95	1390.41	0.974893	0.00093761	AT5G45310	2.31107	2.17778	2.23637	3.76696	3.15291	3.50864
AT2G36300	3215.56	1394.22	0.974831	0.000942228	AT2G36300	22.0012	25.0768	23.5313	17.4938	18.5028	16.997
AT5G22640	2737.25	1348.45	0.974817	0.00094331	TIC100	26.9075	25.294	27.0596	32.9974	28.0361	33.0032
AT1G29150	3128.43	1373.46	0.974791	0.000945252	RPN6	46.9814	49.1673	47.6557	42.8844	46.0759	44.4451
AT2G34170	2875.65	1373.79	0.974726	0.000950085	AT2G34170	2.06743	1.32231	1.85811	2.99403	2.40266	3.10489
AT1G68570	3403.41	1396.54	0.974528	0.000964949	NPF3.1	12.701	9.75457	9.63317	23.7952	18.1646	21.775
AT1G71380	2923.82	1365.21	0.974314	0.000981196	CEL3	1.70633	1.24944	1.226	2.68228	1.86114	2.56518
AT5G18310	3001.86	1368.09	0.974115	0.00099638	AT5G18310	45.2743	49.0953	47.5304	41.8604	44.5442	42.6049
AT5G18400	3307.65	1372.24	0.974081	0.000999006	AT5G18400	110.108	115.964	105.675	79.9854	88.1715	80.5673
AT3G56800	2945.31	1374.72	0.974044	0.00100181	CAM5	344.892	418.447	369.098	290.5	326.34	292.49
AT1G15110	2874.43	1352.05	0.974	0.00100523	AT1G15110	4.72374	4.55628	4.76479	5.76386	4.95776	5.61014
AT1G26770	3533.34	1388.26	0.973996	0.00100555	ATEXPA10	10.5775	8.47999	9.70764	20.8281	14.6921	16.2628
AT5G18490	3038.69	1392.86	0.973975	0.00100713	AT5G18490	22.7158	25.5005	22.535	18.9944	20.7261	19.3331
AT4G00450	3033.52	1352.69	0.97395	0.00100903	MED12	6.39026	5.98905	6.49297	9.12799	7.06758	8.35525
AT2G28450	2905.68	1355.78	0.973741	0.00102525	AT2G28450	6.71679	6.30047	6.65659	8.17976	6.92659	7.81094
AT5G58670	3491.58	1385.68	0.973644	0.00103276	PLC1	34.5031	43.121	41.904	14.668	23.775	19.7384
AT1G31120	2833.93	1343.21	0.973635	0.00103349	POT10	3.03225	2.81026	3.15684	3.81479	3.50388	3.98078
AT3G09940	2798.07	1360.22	0.973531	0.00104162	MDAR3	94.9056	152.655	133.023	30.0419	88.2882	33.7153
AT4G29930	3435.88	1361.04	0.973472	0.00104629	BHLH27	2.18961	2.38138	2.1428	0.48876	1.22804	0.813917
AT3G62700	2867.53	1349.3	0.973433	0.00104934	ABCC14	15.9351	14.5203	14.3316	19.7115	17.3352	20.7685
AT2G29460	3226.36	1366.01	0.973174	0.00106978	GSTU4	39.6381	46.1175	43.0901	22.9267	34.1935	28.2718
AT5G18520	3554.01	1402.41	0.973019	0.00108213	AT5G18520	35.7103	34.979	35.4326	37.466	36.7558	36.9388
AT1G77992	3305.24	1358.58	0.972908	0.00109105	AT1G77992	0	0	0	0.388827	0.186009	0.354585
AT4G21950	2649.49	1322.93	0.972871	0.00109398	AT4G21950	0.325331	0.466582	0.406438	0.126295	0.290005	0.0691037
AT2G40540	2843.56	1360.13	0.972801	0.0010996	POT2	10.6432	9.3026	9.48071	14.3172	10.8544	13.6453
AT5G49430	3271.01	1374.56	0.972591	0.0011166	AT5G49430	3.36813	2.83427	3.25225	4.64516	3.77934	4.08755
AT4G24480	3206.64	1375.15	0.972556	0.00111943	AT4G24480	2.9904	2.79145	3.02807	3.49489	3.21285	3.34312
AT1G56165	2701.19	1322.62	0.972539	0.00112078	AT1G56165	0.718154	0.556735	0.646627	0.885351	0.735335	0.927629
AT1G18910	3160.66	1369.5	0.972514	0.0011228	AT1G18910	3.38139	3.45528	3.57314	2.4722	2.93887	2.47195
AT4G19640	3332.49	1368.79	0.972362	0.00113525	RABF2B	72.0625	76.2206	74.5398	61.6997	68.5162	65.8522
AT1G49840	3570.41	1390.75	0.972256	0.00114395	AT1G49840	7.92807	6.72356	7.16999	12.0661	9.99402	10.5144
AT4G28760	3128.24	1375.38	0.972172	0.00115084	AT4G28760	14.2058	13.4084	13.0769	18.0402	15.1981	17.1066
AT3G59080	2911.55	1345.23	0.97215	0.00115264	AT3G59080	39.2613	36.7525	37.3975	41.917	40.5447	42.5102
AT2G39800	2758.23	1350.28	0.972089	0.0011577	P5CSA	31.8842	27.6676	27.7529	50.4712	34.7545	52.9801
AT2G41160	3589.47	1386.9	0.971808	0.00118099	RBL18	26.9009	28.8456	28.147	21.9217	24.0468	23.4467
AT1G27190	3555.47	1389.56	0.971502	0.00120667	AT1G27190	11.3301	9.99945	11.2117	17.737	15.7081	16.6995
AT5G03355	2981.35	1349.16	0.971446	0.00121133	AT5G03355	16.2135	25.119	19.9727	8.51697	15.3897	10.8084
AT5G37300	3608.52	1383.57	0.971412	0.0012142	WSD1	9.03902	8.07896	8.24136	15.2467	12.9213	14.2405
AT4G11410	2866.99	1336.85	0.971364	0.00121828	AT4G11410	11.4058	10.6859	10.8098	12.24	11.482	12.1135
AT3G06020	3612.72	1385.31	0.971355	0.00121905	FAF4	6.5847	5.83953	6.25915	9.40984	8.10274	8.39195
AT3G17950	3541.28	1393.07	0.971261	0.00122705	Y-3	6.35823	5.51541	6.06786	8.69213	7.67518	7.89639
AT2G40815	3014.23	1323.55	0.971213	0.00123112	AT2G40815	2.97587	2.77452	3.27657	5.08068	3.69786	4.61669
AT5G65270	3022.26	1318.12	0.971163	0.0012354	RABA4A	40.2936	40.643	38.6464	32.6285	36.0821	32.8504
AT3G62100	3040.59	1349.42	0.971062	0.00124398	IAA30	0.783413	0.523222	0.719649	1.36409	0.872932	1.12568
AT2G40610	3507.37	1372.25	0.970966	0.00125224	EXPA8	10.8034	9.31708	9.14185	21.3892	14.9078	17.3851
AT3G14190	3348.33	1338.6	0.970942	0.00125432	PANS1	3.49003	3.49636	3.4197	2.6026	3.0167	2.73906
AT2G28410	3544.36	1368.51	0.970911	0.00125699	AT2G28410	3.42479	3.09827	3.54075	6.62453	5.4857	6.16322
AT3G15710	3405.17	1367.17	0.970905	0.00125746	AT3G15710	41.0965	46.395	43.2499	30.6555	36.6141	34.7798
AT3G03160	3261.22	1334.97	0.970902	0.00125773	AT3G03160	49.6122	51.8058	47.2297	36.1233	42.4823	39.0375
AT2G44640	3359.26	1348.92	0.970875	0.00126005	AT2G44640	7.98706	7.9969	7.98484	9.77928	8.885	9.56408
AT5G67410	3024.8	1344.56	0.970829	0.00126402	AT5G67410	2.58586	2.8898	2.67463	1.62962	2.37617	1.90815
AT1G55350	2828.88	1329.88	0.970778	0.0012684	DEK1	10.7396	8.72735	9.16129	13.3493	10.8109	12.9372
AT1G08507	3243.38	1330.35	0.970777	0.0012685	AT1G08507	0.38457	0.35748	0.444858	0.746461	0.571353	0.680723
AT1G05460	3342.44	1345.31	0.970764	0.00126964	SDE3	2.15353	1.97486	2.12216	3.89745	2.73164	3.22936
AT1G69690	3276.98	1359	0.970692	0.00127581	TCP15	7.47161	7.12515	7.2007	8.96445	8.57279	9.20865
AT1G19740	2947.53	1338.02	0.970683	0.0012766	AT1G19740	22.9033	22.5025	22.3517	30.1377	26.067	31.4175
AT5G46270	3063.05	1346.28	0.970619	0.0012822	AT5G46270	4.04906	3.70203	3.84934	4.96353	4.74223	5.26692
AT1G61120	3515.61	1370.18	0.970506	0.00129198	GES	21.4239	32.3497	29.8421	4.99104	11.2252	8.75383
AT3G25180	3201.75	1390.89	0.970394	0.00130182	CYP82G1	9.7779	19.9212	12.0719	3.88515	5.63988	4.44707
AT4G27260	3495.53	1367.53	0.970373	0.00130361	GH3.5	13.2153	9.98753	12.8478	30.3572	20.2041	22.4153
AT4G34920	2976.02	1337.59	0.970241	0.00131524	AT4G34920	22.2843	23.0634	22.6522	20.7411	21.0888	20.2156
AT1G69640	3542.67	1371.12	0.970231	0.00131611	SBH1	20.3229	21.9506	21.0701	16.2536	18.2101	17.7329
AT4G23650	3449.41	1368.33	0.970192	0.00131957	CPK3	144.398	165.447	160.138	101.604	124.342	116.829
AT3G18110	2665.96	1301.2	0.970163	0.00132211	EMB1270	2.57569	2.36411	2.48379	3.04376	2.80291	3.30132
AT3G03900	2870.48	1313.47	0.970134	0.00132466	APK3	3.13137	2.99788	3.34538	4.05736	3.56227	4.02216
AT5G44060	3604.11	1369.43	0.969947	0.00134121	AT5G44060	47.8067	53.011	49.9921	32.9297	39.1879	37.6146
AT2G34250	2905.7	1336.88	0.969943	0.00134154	AT2G34250	114.487	129.983	124.19	100.57	105.627	96.6036
AT3G19960	3567.98	1382.55	0.969883	0.00134693	ATM1	6.59983	6.07378	6.20078	8.37066	7.7958	8.08251
AT1G02730	2838.36	1321.59	0.969724	0.00136112	CSLD5	4.73238	4.10069	4.78103	6.77316	6.15741	7.6537
AT1G67060	3009.74	1340.03	0.969719	0.00136155	AT1G67060	47.9049	52.1876	47.6341	40.0368	45.7567	42.398
AT5G10060	3620.66	1369.7	0.969646	0.00136804	AT5G10060	8.10635	7.6551	7.64304	10.8924	9.59243	10.0887
AT2G24195	3242.38	1366.31	0.969584	0.00137367	AT2G24195	2.29466	2.84594	2.1185	1.17653	1.59201	1.37946
AT5G51620	2696.51	1314.54	0.969487	0.00138234	AT5G51620	18.6324	21.3957	17.2785	12.9287	16.2246	12.7145
AT3G13772	3500.25	1345.11	0.969464	0.00138445	TMN7	18.1326	17.7246	18.4679	21.7342	20.1725	20.8073
AT2G18280	2767.23	1311.22	0.969264	0.0014025	TULP2	50.4107	45.9107	47.2985	54.5978	50.5579	54.6835
AT2G42070	3457.59	1370.08	0.969232	0.00140546	NUDT23	7.44081	7.04155	7.34338	9.19454	8.79962	9.19513
AT1G09530	3524.55	1380.65	0.969218	0.00140674	PIF3	2.71158	2.32897	2.6935	4.29751	3.83453	4.05115
AT1G52150	2901.14	1325.71	0.96917	0.00141111	ATHB-15	23.3271	21.7259	21.9545	25.3402	24.4069	25.9435
AT1G19770	3103.24	1350.26	0.969106	0.00141687	PUP14	508.75	431.363	450.891	647.166	607.199	678.479
AT4G23740	2933.8	1329.91	0.969077	0.00141952	AT4G23740	7.28195	7.19984	7.14748	9.20528	8.11405	9.512
AT2G30990	3498.84	1343.59	0.968976	0.00142878	AT2G30990	19.3327	22.2116	19.1056	9.09255	13.4233	11.8975
AT1G23490	3461.05	1387.65	0.968904	0.00143537	ARF2-A	331.454	391.563	344.257	240.323	269.14	261.226
AT1G10450	3411.8	1345.41	0.968796	0.0014453	SNL6	5.53955	5.25258	5.63227	6.85388	6.17857	6.39364
AT2G16640	3397.73	1337.51	0.968673	0.00145667	TOC132	10.0579	9.22485	9.94008	14.762	11.7526	12.7177
ATCG00040	3287.16	1370.35	0.968659	0.00145797	MATK	0.709843	1.05613	0.829501	0.323367	0.532685	0.461566
AT3G25970	3617.61	1357.52	0.968623	0.00146136	PCMP-E46	0.296781	0.256849	0.277012	0.496603	0.399113	0.423885
AT1G05717	3156.94	1325.84	0.968562	0.00146701	AT1G05717	0	0	0	0.167128	0.0959415	0.182891
AT2G20070	3158.35	1325.82	0.968549	0.00146817	AT2G20070	0	0	0	0.173996	0.0998843	0.190407
AT5G12400	2836.21	1320.98	0.968377	0.00148423	AT5G12400	6.89758	5.47835	6.31746	8.5661	6.92514	8.27817
AT4G14150	2577.16	1292.94	0.968078	0.00151224	KIN12A	0.890743	0.828706	0.899578	1.01977	0.927151	1.05365
AT5G37830	3263.99	1333.76	0.968038	0.00151598	OXP1	11.1576	11.1834	11.1381	12.9463	11.944	12.6827
AT1G32240	3513.08	1363.63	0.96802	0.00151768	KAN2	0.820843	0.67179	0.631639	1.54132	1.23278	1.4119
AT2G35950	2714.86	1293.48	0.967977	0.00152178	EDA12	1.22971	1.10226	1.39454	3.00493	1.90853	3.49825
AT2G38325	3201.39	1324.15	0.967944	0.00152494	MIR390A	0	0	0	0.415476	0.238509	0.454664
AT4G14880	3168.88	1343.01	0.967928	0.00152643	OASA1	280.14	324.999	312.454	216.664	263.445	242.699
AT5G15537	3080.16	1368.3	0.967798	0.00153876	AT5G15537	0.902827	1.1642	0.977026	0.645625	0.714784	0.630822
AT1G36940	3177.53	1347.5	0.967796	0.00153897	AT1G36940	2.45905	2.87457	2.95252	1.28908	2.10004	1.63943
AT4G33960	3308.73	1357.5	0.967726	0.0015456	AT4G33960	1.8993	1.46878	1.55085	2.71073	2.24082	2.41267
AT1G10960	2830.11	1339.92	0.96766	0.00155187	FD1	222.114	208.117	203.962	268.584	228.339	265.063
AT5G11960	2988.95	1360.1	0.96759	0.00155864	AT5G11960	27.499	29.5447	28.0347	25.5658	26.2066	25.3772
AT4G28550	3415.46	1345.84	0.967582	0.00155933	AT4G28550	5.50737	6.18361	6.18853	3.0463	4.40714	3.82207
AT5G46090	3546.38	1351.01	0.967549	0.00156255	DMP6	1.9885	2.16436	2.10718	1.41294	1.70136	1.62163
AT2G33870	2999.02	1345.3	0.967519	0.00156542	RABA1H	0.143295	0	0.0745914	0.278139	0.186281	0.253644
AT1G67590	3602.32	1357.33	0.967407	0.00157615	AT1G67590	4.2875	4.02927	3.95499	6.16455	5.29464	5.66923
AT1G30630	3639.6	1371.33	0.967399	0.00157692	AT1G30630	65.8086	69.5538	67.9973	55.2883	58.4764	57.5849
AT2G30720	3144.09	1344.58	0.96733	0.00158354	AT2G30720	28.865	37.7297	36.2576	20.873	24.6936	21.9869
AT2G48060	3029.92	1336.36	0.967226	0.00159359	AT2G48060	3.16988	2.2998	2.74112	4.35407	3.34684	3.86737
AT5G16760	3454.53	1347.51	0.967008	0.00161473	ITPK1	25.4256	26.4217	27.2006	17.9604	21.7179	19.7261
AT2G22990	2602.27	1287.85	0.966925	0.00162282	SNG1	160.509	142.822	152.274	187.617	161.26	195.2
AT4G19810	3110.19	1333.94	0.966869	0.00162831	ChiC	2.95786	4.36039	3.49877	1.49676	2.61617	2.07797
AT1G58320	2754.3	1295.57	0.966772	0.00163777	PCR9	2.06829	2.47191	2.37494	1.68259	1.86404	1.51826
AT3G10740	3299.39	1337.27	0.966648	0.00165001	ASD1	57.1445	50.4334	55.3165	75.5296	62.9861	66.58
AT4G37330	3186.82	1344.94	0.966521	0.00166248	CYP81D4	13.0463	12.8737	12.4046	16.7615	14.4298	16.2717
AT3G52990	3119	1320.27	0.966436	0.00167093	AT3G52990	34.837	35.6622	35.1213	31.2987	33.9395	32.579
AT2G21440	2937.28	1292.16	0.966395	0.00167498	AT2G21440	6.89562	6.90485	7.13045	8.8563	7.9209	9.09783
AT3G47295	2800.58	1320.73	0.966307	0.00168375	PSY2	25.6417	22.6718	24.4146	38.2224	26.5191	35.2177
AT5G53130	2802.39	1315.41	0.966233	0.00169104	CNGC1	32.0197	30.6229	29.992	38.1302	34.1106	39.7554
AT3G22380	2870.54	1318.39	0.96623	0.00169133	TIC	26.5336	23.0245	25.049	38.0808	27.244	34.1303
AT1G76280	2805.54	1318.96	0.966198	0.00169458	AT1G76280	2.08969	1.82541	1.94427	2.79618	2.10414	2.61015
AT3G25780	3642.88	1356.75	0.966105	0.00170386	AOC3	329.269	353.719	348.415	229.069	254.589	241.648
AT2G43090	3350.42	1369.62	0.966077	0.00170665	AT2G43090	66.14	69.808	66.8884	60.7378	63.0222	62.4052
AT3G09320	3044.67	1353.93	0.966068	0.00170749	PAT16	6.5235	5.41898	6.7512	8.8636	7.71515	8.46487
AT5G65610	2999.52	1355.55	0.966068	0.00170755	AT5G65610	2.08591	3.14114	2.08475	1.0122	1.2551	0.930446
AT1G32330	3332.2	1309.16	0.966059	0.00170845	HSFA1D	4.93606	5.02097	4.68209	3.66208	4.13118	3.84439
AT1G14000	3657.64	1358.16	0.965889	0.00172547	VIK	43.5226	47.1479	46.0507	32.7447	36.3931	35.5097
AT1G24706	2650.87	1298.29	0.965882	0.00172623	THO2	8.58528	7.86513	8.0983	9.81713	8.53639	9.89746
AT2G46150	2710.92	1286.72	0.965836	0.00173086	AT2G46150	8.71169	9.23622	7.92026	4.92872	7.22445	4.90327
AT5G62560	3257.84	1326.88	0.965477	0.00176721	PUB41	32.6282	31.7281	32.0388	37.5264	36.451	38.4444
AT2G41100	3227.56	1343.41	0.965464	0.00176851	CML12	788.231	886.296	812.45	659.04	739.632	711.912
AT2G43680	3407.09	1320.68	0.965335	0.00178169	IQD14	64.6044	63.1974	63.7297	79.3249	70.2296	73.881
AT4G29100	2834.76	1310.95	0.965276	0.0017877	BHLH68	15.4903	12.4199	14.2355	25.3749	15.8238	22.0321
AT2G17820	3253.96	1333.24	0.965272	0.00178812	AHK1	7.10233	6.9683	6.58227	10.0117	8.56707	10.0333
AT1G02300	3490.57	1362.57	0.965247	0.00179064	CATHB1	2.64389	1.98191	2.54079	4.69156	3.80017	3.93778
AT5G62020	3288.8	1337.45	0.965208	0.00179462	HSFB2A	32.9055	31.0402	30.492	38.6138	36.5056	38.7195
AT5G27320	2860.28	1317.55	0.965116	0.00180409	GID1C	4.28505	3.93373	4.08613	5.50877	4.37335	5.13136
AT4G39940	3484.6	1340.13	0.965076	0.00180824	APK2	96.1808	103.426	95.8377	76.4076	84.8796	83.058
AT3G16560	3026.02	1327.53	0.965062	0.00180967	AT3G16560	3.27412	2.47579	2.78669	4.14892	3.49263	3.86456
AT5G42520	2643.74	1285.14	0.965055	0.00181034	BPC6	25.4605	24.7368	25.0923	26.4006	25.3958	26.4803
AT3G21430	2584.51	1273.34	0.964985	0.00181763	ALY3	4.80826	4.65143	4.86735	5.60839	5.09421	5.85483
AT1G12244	2981.84	1331.69	0.96491	0.00182533	AT1G12244	5.59185	5.17939	4.99689	6.96461	5.86736	6.65645
AT3G56370	2652.24	1283.76	0.964807	0.00183608	IRK	10.0801	8.42599	9.15787	12.4451	9.89598	12.6086
AT3G11800	2667.3	1309.97	0.964688	0.00184835	AT3G11800	38.6718	40.4159	39.8652	32.6352	37.869	32.2832
AT5G39660	3536.35	1324.82	0.964612	0.00185636	CDF2	28.1537	27.6781	27.6461	34.6319	31.1389	32.503
AT5G49360	3334.77	1340.34	0.964578	0.00185987	BXL1	188.18	145.976	173.594	295.324	226.275	241.124
AT5G45560	3617.04	1337.15	0.964556	0.0018621	EDR2L	2.33057	2.17419	2.24305	3.05919	2.69964	2.769
AT2G02480	2979.48	1306.76	0.964545	0.00186328	STI	2.12267	1.86895	2.06442	2.79023	2.20954	2.51121
AT1G74260	2918.23	1320	0.964399	0.00187857	PUR4	10.2047	9.64044	9.51341	11.4685	10.3884	11.1586
AT5G43810	3349.01	1351.72	0.964398	0.00187874	AGO10	4.7528	3.92703	4.81847	8.06427	7.3467	8.03151
AT5G67080	3362.53	1321.7	0.964282	0.00189088	MAPKKK19	7.92015	10.6541	8.87025	3.22771	5.78794	4.9705
AT5G06940	2952.92	1301.32	0.964174	0.00190227	AT5G06940	0.660437	0.516468	0.696062	1.09201	0.76316	0.943884
AT4G05460	2613.71	1291.68	0.963988	0.00192194	SKIP19	6.79161	7.80072	7.5145	5.07905	6.73228	4.85553
AT1G29790	3307.99	1330.13	0.963972	0.00192364	AT1G29790	5.48342	5.15488	4.83849	7.79872	6.80545	7.83592
AT4G25850	3057.29	1317.1	0.963954	0.00192553	ORP4B	4.01203	2.85684	2.87229	6.05009	4.58781	5.44645
AT1G27370	3062.36	1316.89	0.963895	0.00193181	SPL10	5.82105	5.35947	5.31953	6.5282	6.09383	6.41886
AT2G42600	2607.19	1284.95	0.963818	0.00194005	PPC2	61.7864	57.2718	58.2043	70.2831	61.9218	72.046
AT3G16940	2707.89	1295.81	0.963814	0.00194047	AT3G16940	22.0309	19.854	20.4583	25.8741	21.7641	25.333
AT5G60450	3470.35	1361.94	0.963712	0.00195129	ARF4	12.8573	10.5235	12.1448	18.4587	16.3496	16.6631
AT1G14870	2943.38	1305.78	0.963708	0.00195172	PCR2	151.221	196.046	174.619	95.4662	147.046	115.653
AT3G15780	3304.33	1292.72	0.963684	0.00195434	AT3G15780	24.5905	24.8844	25.5262	36.2337	29.8805	33.8179
AT1G68530	2859.69	1299.65	0.963639	0.00195913	CUT1	172.121	161.668	157.961	195.982	181.497	201.555
AT5G61760	3052.59	1325.17	0.963603	0.001963	IPK2B	10.3116	12.9568	11.1794	8.02319	9.75251	8.85806
AT2G22780	3219.89	1350.18	0.96344	0.00198048	PMDH1	56.6845	71.1885	58.93	41.5828	48.7906	46.1386
AT3G61172	3293.86	1304.72	0.963399	0.00198494	LCR8	0	0	0	0.383241	0.146669	0.279592
AT4G19170	3281.64	1321.68	0.963365	0.00198858	CCD4	22.4171	20.351	18.2761	45.5668	35.4871	48.0465
AT4G29600	2843.3	1296.95	0.963354	0.00198982	CDA7	0	0	0	0.131397	0.0502866	0.14379
AT5G42720	2964.97	1301.19	0.963319	0.0019936	AT5G42720	8.11475	7.38703	7.61915	9.6542	9.33778	10.3231
AT3G13210	2810.25	1319.56	0.963281	0.00199773	AT3G13210	1.32463	1.48099	1.59037	0.787931	1.20222	0.782832
AT1G16750	2708.68	1279.57	0.963219	0.00200439	AT1G16750	2.73341	2.1208	2.51295	3.40158	2.71416	3.41807
AT2G37900	2887.59	1311.12	0.963171	0.00200959	NPF5.6	6.21459	4.87631	6.78459	9.95446	7.52458	9.15805
AT3G18820	3547.54	1308.95	0.963159	0.00201087	RABG3F	90.211	93.8242	87.1935	60.9516	71.7555	68.0319
AT5G13740	3190.12	1342.92	0.963084	0.00201906	ZIF1	33.5753	29.5488	33.1955	43.5316	41.9376	44.6825
AT4G36800	3394.14	1304.89	0.963037	0.00202411	RCE1	77.4382	76.478	77.1861	58.5085	66.1571	60.3262
AT2G25740	3300.42	1358.95	0.962913	0.00203765	AT2G25740	8.5899	10.6099	9.22292	6.45502	7.05972	6.81756
AT1G65610	3395.55	1313.09	0.962893	0.00203983	KOR2	6.30978	8.62877	7.67442	1.54075	3.93229	3.04996
AT5G65430	3546.77	1328.33	0.96286	0.00204348	GRF8	120.739	132.829	132.179	83.0807	100.679	95.7939
AT1G76390	3314.38	1344.58	0.962733	0.00205733	PUB43	13.6578	16.1703	15.0641	10.2933	10.8464	10.2663

## Sheet: cornflowerblue
Supplementary Data S7. List of top-ranking 10% genes with highest KME within the co-expression module of “cornflower” derived from WGCNA
GeneID	Conn-total	Conn-intramodular	KME	KME-p value	GeneName	LB1-FPKM	LB2-FPKM	LB3-FPKM	LD1-FPKM	LD2-FPKM	LD3-FPKM
AT1G66090	2889.8	472.958	0.99876	2.3e-06	AT1G66090	88.51	150.895	86.2286	206.888	221.468	195.034
AT5G09400	2973.13	468.834	0.997738	7.67e-06	POT7	85.9594	207.216	72.1801	420.367	423.697	366.976
AT1G19300	2954.19	469.05	0.997024	1.33e-05	GATL1	39.0431	42.9377	38.3239	46.1597	46.3553	44.8479
AT2G17650	3026.77	469.416	0.996278	2.08e-05	AAE2	5.61345	4.33517	5.55027	3.48992	3.48271	3.58595
AT1G28370	2702.96	459.61	0.995678	2.8e-05	ERF11	152.771	192.834	145.694	215.429	216.955	211.182
AT4G31620	2714.19	462.444	0.995441	3.11e-05	AT4G31620	0.322907	0.647795	0.312162	0.805848	0.860961	0.820615
AT5G27420	2983.75	470.816	0.99534	3.25e-05	ATL31	16.9785	36.1383	18.1109	59.4899	66.5713	51.5042
AT1G12540	3129.81	463.024	0.994279	4.9e-05	BHLH55	1.26054	0.561755	1.33457	0.0622051	0.0952255	0.136145
AT4G32050	3044.69	463.275	0.994266	4.92e-05	AT4G32050	3.52114	4.20828	3.41263	4.89508	5.06638	4.73912
AT1G77500	3023.57	460.174	0.994165	5.1e-05	AT1G77500	16.4338	19.5133	15.7967	22.9594	22.7261	22.5466
AT1G19540	3177.07	464.122	0.994025	5.34e-05	AT1G19540	18.2086	14.5385	18.7398	11.2417	11.5258	12.2438
AT1G70130	2919.77	465.24	0.992613	8.16e-05	LECRK52	16.9741	11.7166	15.666	9.18202	9.38532	10.0253
AT5G67450	2711.95	454.127	0.992014	9.54e-05	AZF1	3.67424	7.97003	3.20172	10.9962	12.0298	9.16252
AT4G23540	3081.89	460.258	0.991849	9.94e-05	AT4G23540	3.85331	4.08765	3.82598	4.33927	4.28652	4.20741
AT5G62165	2554.54	450.062	0.99171	0.000102792	AGL42	6.6581	8.16232	6.57468	8.68041	8.70847	8.64939
AT4G18197	3074.72	461.793	0.991359	0.000111672	PUP7	10.7686	15.5455	10.6373	21.4257	21.7339	18.1184
AT1G11390	2759.5	458.527	0.991343	0.000112092	AT1G11390	7.84189	5.8656	7.60873	5.05652	4.91387	4.91023
AT4G25440	2586.95	453.495	0.990875	0.000124525	ZFWD1	7.30506	6.62177	7.26231	6.45033	6.35717	6.44656
AT1G10120	2961.87	459.962	0.990699	0.000129368	BHLH74	14.6107	11.1815	14.6629	9.26656	8.82271	10.2159
AT1G58420	2878.88	455.283	0.990493	0.000135142	AT1G58420	34.6801	44.3836	33.9237	51.2108	55.6297	49.4419
AT1G21010	3094.59	456.691	0.99044	0.000136641	AT1G21010	28.8728	24.8248	30.038	21.1836	20.7693	22.5778
AT1G72940	2957.86	457.433	0.990079	0.00014716	AT1G72940	17.1807	29.259	17.9401	42.3639	48.7676	43.1709
AT5G22250	2917.36	461.841	0.989795	0.000155671	CAF1-11	72.6916	108.126	79.6795	138.106	146.815	135.338
AT2G47790	2796.51	453.239	0.989779	0.000156165	GTS1	9.1089	10.2403	9.0056	10.8596	11.1173	10.4919
AT1G18650	2874.42	457.592	0.989745	0.00015722	PDCB3	8.92266	10.1777	9.20458	11.0679	10.9093	10.8877
AT3G13062	2552.12	447.919	0.989742	0.000157297	AT3G13062	35.5677	48.1756	35.8183	53.4378	52.071	52.682
AT1G63720	3225.01	454.531	0.989491	0.000165075	AT1G63720	6.89957	9.95374	7.05556	15.0564	14.6026	13.9328
AT1G23052	2823.33	452.836	0.989467	0.000165817	AT1G23052	21.3764	15.1629	23.1507	11.828	12.0951	14.0345
AT4G18205	2736.21	444.479	0.989319	0.000170516	PUP22	30.1749	40.1919	27.8184	46.2871	50.7821	46.4755
AT1G23050	2825.2	452.569	0.989298	0.000171199	AT1G23050	21.3764	15.1629	23.1507	11.801	12.0951	14.0345
AT4G36970	2942.57	451.553	0.98919	0.000174662	AT4G36970	3.68294	4.5564	3.31006	5.59888	5.49844	5.13382
AT5G53550	2718.12	449.834	0.989168	0.000175369	YSL3	18.5156	23.6246	18.0442	26.2594	27.2173	24.4206
AT2G37130	2793.67	449.651	0.989143	0.000176182	PER21	23.8109	35.5084	23.0619	43.2447	50.2824	44.2962
AT2G38995	2616.7	448.634	0.988717	0.000190237	AT2G38995	5.12776	6.20301	5.15437	6.63205	6.79154	6.82677
AT2G18240	2629.97	442.547	0.988549	0.000195935	AT2G18240	5.37985	6.53308	5.02461	7.11832	7.2475	6.85275
AT2G33580	3257.35	451.334	0.988549	0.000195937	LYK5	31.2671	38.9672	29.6035	53.15	51.1973	48.2807
AT4G32070	2603.38	444.835	0.988003	0.000215017	Phox4	17.506	14.26	17.6412	13.321	13.1387	14.0678
AT5G17020	2848.61	450.503	0.987826	0.00022142	XPO1	34.3378	32.3248	34.6762	30.887	31.1321	31.9343
AT3G54030	2555.59	444.38	0.987335	0.000239587	BSK6	28.6868	23.3027	28.195	21.5782	22.1632	21.8234
AT1G67080	2709.44	446.052	0.987252	0.000242735	ABA4	10.8105	13.3663	10.5618	14.6979	15.0663	13.6534
AT5G01445	2625.79	442.614	0.987051	0.000250432	AT5G01445	0.544391	1.16183	0.485794	1.58502	1.38651	1.28024
AT1G80325	2728.05	441.528	0.98703	0.000251245	AT1G80325	1.60528	3.59233	0.949098	5.91121	5.5796	5.2129
AT5G20250	3025.78	447.779	0.986994	0.000252635	DIN10	382.03	265.876	448.374	180.132	171.151	211.756
AT2G26190	3122.86	456.086	0.986853	0.000258124	IQM4	44.3601	72.0123	49.204	110.577	115.165	93.7323
AT2G46370	3123.08	450.899	0.986598	0.000268209	JAR1	40.8591	26.5381	39.945	17.3447	15.151	18.3461
AT5G05810	2771.87	445.658	0.986513	0.000271631	ATL43	2.20026	1.43015	2.10313	1.04896	1.19	1.29822
AT4G25640	2959.83	452.043	0.986451	0.000274123	ATDTX35	52.6736	64.7554	54.8379	75.3709	78.4189	76.3039
AT1G24140	2947.38	450.028	0.986342	0.000278541	3MMP	24.06	37.3112	25.9451	51.7779	54.7644	53.9589
AT4G38890	3033.2	446.388	0.986264	0.000281711	AT4G38890	8.17906	9.06615	8.29238	9.97663	9.63383	9.55421
AT4G32160	2924.2	442.405	0.986252	0.000282222	EREL1	11.8968	10.932	12.3632	9.9991	10.2482	10.1949
AT5G15440	3205.07	446.114	0.98612	0.00028765	EDL1	13.8852	12.0619	14.2863	10.0634	9.70393	10.4248
AT5G10560	3059.47	445.329	0.985994	0.000292878	BXL6	9.48183	10.2947	9.24578	11.3651	10.9838	10.8946
AT1G50170	2966.14	445.089	0.985925	0.000295763	SIRB	9.24627	10.4844	9.35407	11.7006	11.1948	11.0345
AT3G19840	2779.79	442.019	0.985815	0.000300374	MED35C	6.52869	5.96945	6.67108	5.68349	5.53181	5.82632
AT2G16660	2757.29	447.112	0.985605	0.00030933	AT2G16660	38.8798	24.6689	38.1984	20.5527	17.5811	21.9139
AT5G66050	3033.81	446.626	0.985583	0.000310259	AT5G66050	19.3062	16.5674	20.0101	14.3393	13.7234	15.2698
AT5G47220	2952.37	445.151	0.985267	0.000323981	ERF2	71.2024	90.9718	70.3718	113.931	105.364	98.1866
AT1G21980	2819.35	453.761	0.984985	0.000336461	PIP5K1	25.3231	15.8488	22.4967	12.5916	11.6456	13.8807
AT5G11490	2516.58	430.491	0.984948	0.000338159	AT5G11490	15.5676	16.8703	15.2888	17.1985	17.5322	17.2197
AT3G15540	2639.62	438.722	0.984592	0.000354263	IAA19	51.2716	42.0348	50.2857	38.0076	39.8978	40.7255
AT5G35750	3338.88	442.238	0.98449	0.000358967	AHK2	11.3258	9.09152	11.6521	6.38076	6.53035	6.92804
AT5G63280	3333.41	445.054	0.98437	0.000364543	AT5G63280	8.23532	8.43635	8.23787	8.72912	8.73234	8.64558
AT1G05575	2722.92	437.769	0.984194	0.000372788	AT1G05575	61.0647	88.2483	57.3273	103.25	117.358	96.1332
AT5G27030	2933.43	451.859	0.984157	0.000374506	TPR3	13.2301	10.0807	12.4049	8.46508	8.18851	9.28845
AT3G23290	2580.79	429.351	0.983727	0.000395067	LSH4	4.48686	7.15616	3.92252	8.20841	9.45911	8.06943
AT2G44810	3036.09	450.684	0.983716	0.000395605	DAD1	2.05514	0.788084	1.5675	0.170656	0.159197	0.361833
AT1G80180	2794.49	444.522	0.983563	0.000403028	AT1G80180	56.5571	75.7792	61.568	89.8191	85.9588	82.7292
AT2G28120	3343.9	442.763	0.98356	0.000403197	AT2G28120	15.0523	10.3635	14.6172	5.94469	6.35043	7.11633
AT1G61040	3041.51	442.868	0.983504	0.000405939	VIP5	11.2551	10.6733	11.5522	9.99	10.0442	10.3461
AT2G41510	3134.39	442.077	0.983482	0.000407032	ATCKX1	0.481505	0.575469	0.435082	0.723004	0.698497	0.656115
AT5G67385	3207.62	439.37	0.983417	0.000410203	SR1IP1	15.3954	18.7274	14.9521	24.5135	22.4185	22.1519
AT2G26975	2762.01	435.904	0.983354	0.000413331	COPT6	29.8759	36.6383	26.7234	43.7219	41.4542	41.4194
AT3G58040	2927.9	449.508	0.983338	0.000414112	SINAT2	10.3443	9.0782	10.0193	8.33009	8.00797	8.34118
AT5G42380	3077.34	442.799	0.983256	0.000418172	CML37	145.138	200.554	138.329	274.646	308.846	245.051
AT2G18160	3312.71	439.399	0.983249	0.000418543	BZIP2	94.3296	77.5822	93.7892	58.45	61.2615	62.1846
AT1G13080	2977.87	445.118	0.982965	0.000432797	CYP71B2	9.65108	12.8687	9.62273	16.0186	16.7327	13.8833
AT1G20970	2786.95	437.758	0.982852	0.000438553	AT1G20970	44.5767	34.9875	46.1588	30.9348	28.3017	32.9113
AT5G44562	2689.68	430.245	0.982637	0.000449618	AT5G44562	0.954304	0.550602	1.16481	0.319367	0.366673	0.314541
