# Supplementary material for: Molecular Targets and Biological Functions of cAMP Signaling in Arabidopsis
Source: Biomolecules. 2021 May 3;11(5):688. doi: 10.3390/biom11050688 (PMC8147800; doi:10.3390/biom11050688)
Supplement: Supplementary file 1 [file biomolecules-11-00688-s001.zip › Supplementary Figure S1.pdf]

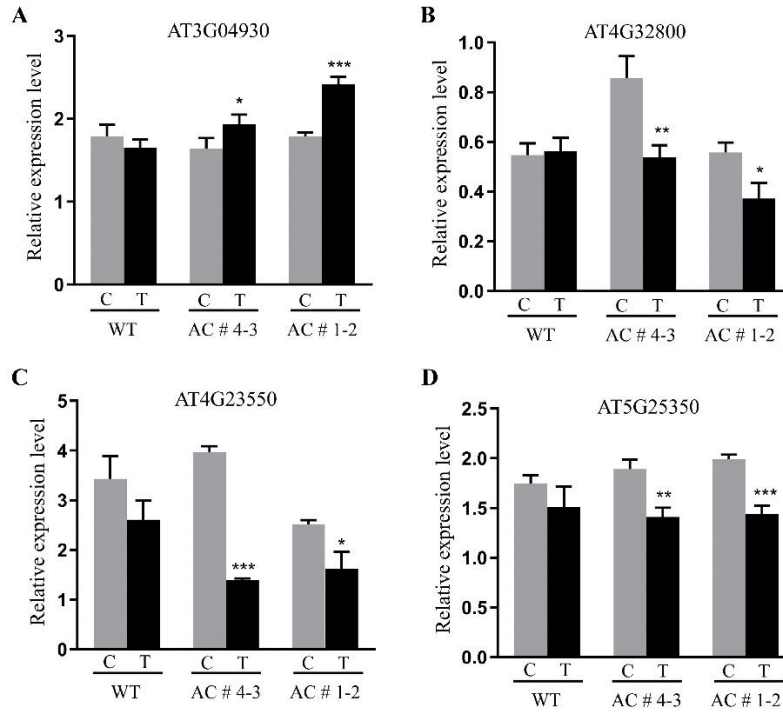

**Supplementary Figure S1.** Quantitative RT-PCR detection of cAMP-responsive genes (CRGs) in independent AC transgenic lines and wild type plants. About two-week-old AC transgenic plants (transgenic lines AC #4-3 and AC #1-2) and wild type (WT) plants were thoroughly sprayed with 30  $\mu$ M dexamethasone (T) or mock control (C), and then covered overnight using a transparent plastic dome. Shoot tissue samples were collected 24 h after spray and used for total RNA isolation. Quantitative RT-PCR was performed to detect relative expression of CRGs using the  $2^{-\Delta\Delta C_q}$  method.  $\beta$ -tubulin (*AtTUB4*) was used as an internal control. (A) AT3G04930. (B) AT4G32800. (C) AT4G23550. (D) AT5G25350. Data are Ave  $\pm$  SD (n = 3), two-tailed Student's *t*-test \**p* < 0.05, \*\**p* < 0.01, \*\*\**p* < 0.001.
