# Supplementary material for: Molecular Targets and Biological Functions of cAMP Signaling in Arabidopsis
Source: Biomolecules. 2021 May 3;11(5):688. doi: 10.3390/biom11050688 (PMC8147800; doi:10.3390/biom11050688)
Supplement: Supplementary file 1 [file biomolecules-11-00688-s001.zip › Supplementary Figure S2.pdf]

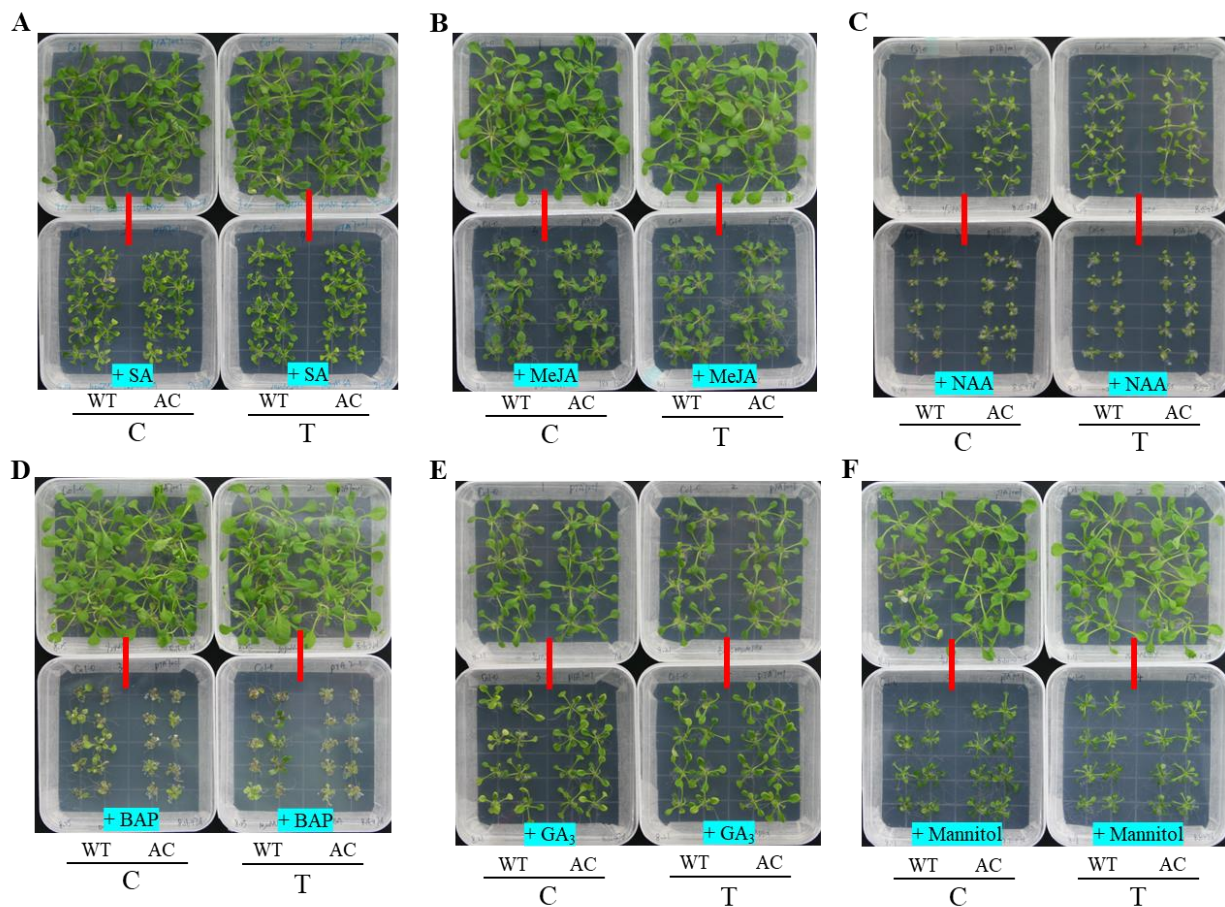

**Supplementary Figure S2.** Phenotypic characterization of cellular cAMP elevation in plants grown under different treatment regimes. (A) 100  $\mu$ M SA (salicylic acid), photograph taken 10 days after treatment. (B) 50  $\mu$ M MeJA (methyl jasmonate), photograph taken 12 days after treatment. (C) 0.1  $\mu$ M NAA (1-naphthaleneacetic acid), photograph taken 4 days after treatment. (D) 0.1  $\mu$ M BAP (6-benzylaminopurine), photograph taken 14 days after treatment. (E) 10  $\mu$ M GA<sub>3</sub> (gibberellic acid), photograph taken 7 days after treatment. (F) 100 mM mannitol, photograph taken 10 days after treatment. In (A) to (F), seven-day-old AC transgenic seedlings and wild type (WT) Col-0 seedlings were transplanted onto 1/2MS basal salt growth medium containing 10  $\mu$ M dexamethasone (T; right column panels) or mock control (C; left column panels) with the addition of indicated treatments (bottom row panels) or mock control (upper row panels).
