# Supplementary material for: Molecular Targets and Biological Functions of cAMP Signaling in Arabidopsis
Source: Biomolecules. 2021 May 3;11(5):688. doi: 10.3390/biom11050688 (PMC8147800; doi:10.3390/biom11050688)
Supplement: Supplementary file 1 [file biomolecules-11-00688-s001.zip › Supplementary Table S1.pdf]

**Supplementary Table S1.** Primers used in this study

| Gene ID                        | Sequence (5'→3')                                                                                   | Size (bp)               |
|--------------------------------|----------------------------------------------------------------------------------------------------|-------------------------|
| At5G09400<br>( <i>AtKUP7</i> ) | Forward: <u>C</u> ACC ATG GCG GAG GAA AGC AGT AT<br>Reverse: <u>T</u> TA TTT CCT CCC AAC GGT CAA G | 319 (RNA)<br>882 (gDNA) |
| <i>AC</i> transgene            | Forward: ATG GCG GAG GAA AGC AGT AT<br>Reverse: TTT CCT CCC AAC GGT CAA G                          | 312                     |
| At5G44340<br>( <i>AtTUB4</i> ) | Forward: TGT TTC GTT CAT GTG TGT TCG TT<br>Reverse: ACA CGC AAA AGT TTA ACA AAT CCA                | 74                      |
| AT1G14920                      | Forward: GAC GAC CTG GTG CGA TCG AT<br>Reverse: GGT ACA CCT TCC AAC GAG TCA                        | 169                     |
| AT1G61120                      | Forward: TGT CCA TCT TCG CAA CAT CTG G<br>Reverse: TGT GTG CTG CGA TTG AGA TCA TTC                 | 131                     |
| AT2G38310                      | Forward: CTA GCT CCA CCG AGA GAC TC<br>Reverse: AAC GAC GTA AGA CTC GAC AAC GA                     | 158                     |
| AT2G38470                      | Forward: TCT TGA GAT ACC AAA GTT CAG ATC<br>Reverse: TGG TTG GAG AAG CTA GAA CGT TA                | 152                     |
| AT2G46370                      | Forward: CTG CCA TTT CCT TAA GCT CTG GA<br>Reverse: ATG TAC TGC TTG CTG CTG AAG ATA                | 181                     |
| AT3G04930                      | Forward: GAT AAA GTC GAA ACT TCA GCT GGA T<br>Reverse: AGA CTG ATC ATG AGG GCT CTT GA              | 142                     |
| AT3G09870                      | Forward: GGA AGA GGG TAA TGC TGC ATC A<br>Reverse: CCC TTA ACC GCA ATC ACT GCT A                   | 75                      |
| AT4G03400                      | Forward: GTT CTA ACC ACT TTC ACA GGT CTT<br>Reverse: AGA AGC TGA GAC GCC TTG TCA                   | 185                     |
| AT4G23550                      | Forward: CGA ACC GGA GAT GGA GAC AAG T<br>Reverse: CCG AGC TTG TGA GGA TCG TTT G                   | 95                      |
| AT4G27260                      | Forward: CTC TTA CAC GCT CAT ACC ATC CA<br>Reverse: TCT GCA AAG CCC GGC GTA AG                     | 193                     |
| AT4G32800                      | Forward: AAA GTT ACC GAG TCT AGG AAC GA<br>Reverse: CCA CCG AGG CAT GTA CAC CA                     | 91                      |
| AT5G25350                      | Forward: GGT TGG GAC GTC GAG TCG T<br>Reverse: CAA CAT CAG TCA CCT TAC TCT CA                      | 80                      |
| AT5G47230                      | Forward: CTC TTG AAG TTG GGA AGT GGA A<br>Reverse: ACC GTT AAC GTC AAC GCT CTG T                   | 128                     |
| AT3G18780<br>( <i>AtACT2</i> ) | Forward: CTT GCA CCA AGC AGC ATG AA<br>Reverse: CCG ATC CAG ACA CTG TAC TTC CTT                    | 68                      |
| Vd991-ITS                      | Forward: CGG TGT TGG GGA TCT ACG TC<br>Reverse: CGG GCT TGT AGG GGG TTT AG                         | 129                     |

Note: the underline indicates nucleotides added for cloning purpose.
