# Supplementary material for: Molecular Targets and Biological Functions of cAMP Signaling in Arabidopsis
Source: Biomolecules. 2021 May 3;11(5):688. doi: 10.3390/biom11050688 (PMC8147800; doi:10.3390/biom11050688)
Supplement: Supplementary file 1 [file biomolecules-11-00688-s001.zip › Supplementary Table S2.pdf]

**Supplementary Table S2.** List of cAMP-responsive gene sets

| Gene Set                                                 | Size | Core Subset | NES   | <i>P</i> -value | FDR  |
|----------------------------------------------------------|------|-------------|-------|-----------------|------|
| <b>GO term-based</b>                                     |      |             |       |                 |      |
| Intracellular signal transduction                        | 489  | 102         | -1.48 | 1.2E-03         | 0.21 |
| Apoplast                                                 | 398  | 87          | -1.56 | 1.2E-03         | 0.21 |
| Response to oxidative stress                             | 386  | 76          | -1.44 | 1.2E-03         | 0.21 |
| Glycosyl compound metabolism                             | 207  | 76          | -1.86 | 1.4E-03         | 0.21 |
| Response to wounding                                     | 185  | 62          | -1.77 | 1.4E-03         | 0.21 |
| Secondary metabolic process                              | 381  | 123         | -1.42 | 2.5E-03         | 0.21 |
| Sulfur compound metabolic process                        | 340  | 122         | -1.46 | 2.6E-03         | 0.21 |
| Ethylene-activated signaling pathway                     | 153  | 46          | -1.73 | 2.8E-03         | 0.21 |
| Phosphorelay signal transduction system                  | 170  | 47          | -1.68 | 2.8E-03         | 0.21 |
| Intracellular                                            | 142  | 44          | -1.72 | 2.9E-03         | 0.21 |
| Response to chitin                                       | 113  | 42          | 1.97  | 3.0E-03         | 0.21 |
| S-glycoside metabolic process                            | 102  | 53          | -1.76 | 3.0E-03         | 0.21 |
| Pattern specification process                            | 153  | 55          | 1.88  | 3.4E-03         | 0.21 |
| Response to organonitrogen compound                      | 209  | 48          | 1.67  | 3.7E-03         | 0.21 |
| Cell division                                            | 248  | 98          | 1.61  | 4.1E-03         | 0.21 |
| Response to nitrogen compound                            | 254  | 53          | 1.57  | 4.1E-03         | 0.21 |
| Transferase activity, transferring alkyl or aryl groups  | 133  | 52          | -1.71 | 4.4E-03         | 0.21 |
| Chemical homeostasis                                     | 322  | 65          | 1.71  | 4.7E-03         | 0.21 |
| Molecular function regulator                             | 382  | 77          | -1.40 | 4.9E-03         | 0.21 |
| Enzyme regulator activity                                | 301  | 78          | -1.47 | 5.1E-03         | 0.21 |
| ATPase activity                                          | 361  | 166         | 1.36  | 5.2E-03         | 0.21 |
| Microtubule motor activity                               | 60   | 42          | 1.72  | 5.2E-03         | 0.21 |
| Response to drug                                         | 391  | 68          | 1.45  | 5.3E-03         | 0.21 |
| Kinesin complex                                          | 58   | 42          | 1.81  | 5.3E-03         | 0.21 |
| Absciscic acid-activated signaling pathway               | 228  | 52          | -1.55 | 5.4E-03         | 0.21 |
| Glucosyltransferase activity                             | 179  | 46          | -1.61 | 5.6E-03         | 0.21 |
| Lipid catabolic process                                  | 196  | 43          | -1.55 | 5.6E-03         | 0.21 |
| Homeostatic process                                      | 494  | 82          | 1.50  | 5.6E-03         | 0.21 |
| Microtubule associated complex                           | 87   | 58          | 1.82  | 5.7E-03         | 0.21 |
| Response to jasmonic acid                                | 151  | 44          | -1.66 | 5.7E-03         | 0.21 |
| Transferase activity, transferring glycosyl groups       | 472  | 111         | -1.38 | 5.9E-03         | 0.21 |
| Tissue development                                       | 126  | 49          | 1.74  | 6.1E-03         | 0.21 |
| Anatomical structure formation involved in morphogenesis | 141  | 55          | 1.64  | 6.5E-03         | 0.21 |
| Copper ion binding                                       | 183  | 50          | -1.57 | 6.9E-03         | 0.21 |
| Metal ion transmembrane transporter activity             | 179  | 45          | 1.68  | 7.0E-03         | 0.21 |
| Auxin-activated signaling pathway                        | 181  | 58          | 1.63  | 7.2E-03         | 0.21 |
| Metal ion transport                                      | 181  | 43          | 1.58  | 7.2E-03         | 0.21 |
| Ion homeostasis                                          | 225  | 44          | 1.54  | 7.6E-03         | 0.21 |
| Hormone metabolic process                                | 186  | 57          | -1.49 | 1.1E-02         | 0.23 |
| <b>KEGG pathway-based</b>                                |      |             |       |                 |      |
| Phenylalanine, tyrosine and tryptophan biosynthesis      | 52   | 28          | -1.80 | 1.6E-03         | 0.13 |
| $\alpha$ -Linolenic acid metabolism                      | 34   | 10          | -1.91 | 1.6E-03         | 0.13 |
| Phosphatidylinositol signaling system                    | 58   | 23          | -1.68 | 3.0E-03         | 0.13 |
| Inositol phosphate metabolism                            | 61   | 20          | -1.68 | 3.1E-03         | 0.13 |
| Estrogen signaling pathway                               | 26   | 11          | -1.78 | 3.3E-03         | 0.13 |

Note: Gene sets were determined using GSEA (Gene Set Enrichment Analysis) with the false discovery rate (FDR) < 0.25 of normalized enrichment score (NES). Size, number of genes in the gene set. Core Subset, number of genes in the leading-edge subset that contribute most to the enrichment result; for a list of core genes, see Supplementary Data S5.
