# Supplementary material for: Molecular Targets and Biological Functions of cAMP Signaling in Arabidopsis
Source: Biomolecules. 2021 May 3;11(5):688. doi: 10.3390/biom11050688 (PMC8147800; doi:10.3390/biom11050688)
Supplement: Supplementary file 1 [file biomolecules-11-00688-s001.zip › Supplementary Table S3.pdf]

**Supplementary Table S3.** WGCNA co-expression modules and correlation with cellular cAMP elevation

| Module name           | Size<br>(n) | ME vs. Trait |                 | GS vs. MM |                 | CRGs<br>(n) | Hubs<br>(n) |
|-----------------------|-------------|--------------|-----------------|-----------|-----------------|-------------|-------------|
|                       |             | R            | <i>p</i> -value | R         | <i>p</i> -value |             |             |
| <b>Darkorange2</b>    | 3183        | <b>0.88</b>  | <b>0.02</b>     | 0.59      | <1e-200         | 88          | 3           |
| <b>Cornflowerblue</b> | 786         | <b>0.88</b>  | <b>0.02</b>     | 0.64      | 8.7e-92         | 31          | 3           |
| <b>Peachpuff2</b>     | 140         | <b>0.88</b>  | <b>0.02</b>     | 0.54      | 5.8e-12         | 2           | 3           |
| Forestgreen           | 782         | 0.68         | 0.1             | 0.24      | 0.1e-10         | 1           | 3           |
| Lightpink3            | 357         | 0.68         | 0.1             | 0.17      | 1.3e-03         | 0           | 3           |
| Royalblue3            | 469         | 0.68         | 0.1             | -0.058    | 0.21            | 0           | 3           |
| Steelblue             | 663         | 0.68         | 0.1             | 0.53      | 2.7e-49         | 2           | 3           |
| Dodgerblue3           | 1096        | 0.49         | 0.3             | 0.059     | 0.051           | 5           | 2           |
| Goldenrod3            | 345         | 0.49         | 0.3             | -0.018    | 0.74            | 0           | 3           |
| Lemonchiffon4         | 604         | 0.49         | 0.3             | -0.3      | 5e-14           | 0           | 3           |
| Orangered2            | 320         | 0.49         | 0.3             | 0.0092    | 0.87            | 0           | 3           |
| Burlywood             | 1260        | 0.29         | 0.6             | 0.03      | 0.29            | 1           | 3           |
| Chocolate3            | 318         | 0.29         | 0.6             | -0.065    | 0.25            | 0           | 3           |
| Deeppink              | 246         | 0.29         | 0.6             | 0.23      | 2.7e-4          | 0           | 3           |
| Deepskyblue3          | 452         | 0.29         | 0.6             | 0.16      | 6.4e-4          | 0           | 3           |
| Green                 | 897         | 0.29         | 0.6             | 0.22      | 2.7e-11         | 0           | 1           |
| Red4                  | 184         | 0.29         | 0.6             | 0.12      | 0.1             | 0           | 3           |
| Bisque4               | 1677        | 0.098        | 0.9             | -0.45     | 2.2e-84         | 0           | 3           |
| Brown4                | 2915        | 0.098        | 0.9             | -0.36     | 6.5e-90         | 0           | 3           |
| Chartreuse4           | 890         | 0.098        | 0.9             | 0.17      | 3.4e-07         | 1           | 2           |
| Cornsilk              | 285         | 0.098        | 0.9             | -0.11     | 0.064           | 0           | 3           |
| Salmon4               | 249         | 0.098        | 0.9             | -0.13     | 0.04            | 0           | 3           |
| Dodgeblue2            | 662         | -0.098       | 0.9             | -0.47     | 1.1e-37         | 0           | 3           |
| Lightseagreen         | 158         | -0.098       | 0.9             | -0.14     | 0.079           | 0           | 3           |
| Lightskyblue3         | 122         | -0.098       | 0.9             | -0.33     | 2.1e-04         | 0           | 3           |
| Mistyrose4            | 2326        | -0.098       | 0.9             | 0.049     | 0.018           | 1           | 1           |
| Skyblue1              | 869         | -0.098       | 0.9             | 0.2       | 2.7e-09         | 1           | 2           |
| Cyan1                 | 612         | -0.29        | 0.6             | 0.31      | 4.2e-15         | 2           | 3           |
| Cyan3                 | 182         | -0.29        | 0.6             | -0.05     | 0.5             | 0           | 3           |
| Moccasin              | 144         | -0.49        | 0.3             | 0.24      | 3.8e-3          | 1           | 3           |
| Antiquewhite          | 233         | -0.68        | 0.1             | 0.49      | 1.8e-15         | 2           | 3           |
| Paleturquoise         | 734         | -0.68        | 0.1             | 0.46      | 0.1e-38         | 4           | 3           |
| <b>Orange</b>         | 171         | <b>-0.88</b> | <b>0.02</b>     | 0.12      | 0.12            | 0           | 3           |
| <b>Aquamarine1</b>    | 841         | <b>-0.88</b> | <b>0.02</b>     | 0.055     | 0.11            | 1           | 3           |
| <b>Chocolate1</b>     | 3119        | <b>-0.88</b> | <b>0.02</b>     | 0.76      | <1e-200         | 284         | 3           |

Note: WGCNA (Weighted Correlation Network Analysis) was performed to determine co-expression modules. The modules in bold indicate their significant relationship with cellular cAMP elevation by the threshold  $p < 0.05$  of correlation coefficient (R). Size, number of genes in the module; CRGs, number of cAMP-responsive genes included in the module; Hubs, number of hub genes that were defined with more than 4 connections in the constructed network of top 10% genes with highest  $K_{ME}$  in the module, wherein  $K_{ME}$  represents eigengene connectivity measured for each gene by correlating its gene expression profile with the module eigengene (ME) which is defined as the first principal component of gene expression values and represents the gene expression profiles in the module. ME vs. Trait, the correlation between ME and trait (i.e. induction of cAMP elevation); GS vs. MM, the correlation between module membership (MM, also known as  $K_{ME}$ ) and gene significance (GS) which is defined as the correlation of gene expression profiles with the trait.
